# Supplementary material for: Engineering Sr-doping for enabling long-term stable FAPb1−xSrxI3 quantum dots with 100% photoluminescence quantum yield
Source: Royal Society of Chemistry journal article supplement (doi:10.1039/d0tc04625f), 2021-01-01
Supplement: d0tc04625f2.xlsx [file d0tc04625f2.xlsx]

## Sheet: PLQY_day 0_PQDs
QUA												QUA
4												4
3	1024	1	1	0	1	255	283	571	1012			11	1024	1	1	0	1	255	283	490	1023
389.09nm	410.22nm	625.89nm	948.97nm									389.09nm	410.22nm	565.57nm	956.90nm
FAPbI3												FAPbSrI3 = 4, 7, 12, 6%
N o.	Cursor1-2: 389.09 - 410.22(nm)	Cursor3-4: 625.89 - 948.97(nm)	QuantumYield	Abs	Peak Wavelength	Peak Count	Peak FWHM	Peak Wavelength	Peak Count	Peak FWHM		N o.	Cursor1-2: 389.09 - 410.22(nm)	Cursor3-4: 565.57 - 956.90(nm)	QuantumYield	Abs	Peak Wavelength	Peak Count	Peak FWHM	Peak Wavelength	Peak Count	Peak FWHM
1	98115874	---	---	---	399.66	35049.6	6.64	783.86	71.21	44.71		1	148004134	---	---	---	399.66	52993.3	6.63	883.11	27.48	4.57
2	21852617	70051176	0.919	0.777	399.66	7869.84	6.6	783.86	1555.8	53.38		2	40286270	79939941	0.742	0.728	399.66	14433.8	6.63	752.29	1626.1	60.52
3	18068105	76900941	0.961	0.816	399.66	6511.9	6.6	785.33	1702.01	53.43		3	25431588	107323132	0.876	0.828	399.66	9124.93	6.62	754.5	2168.28	61.05
												4	22485156	122730556	0.978	0.848	399.66	8078.79	6.63	757.44	2596.43	58.81
												5	15917033	131988006	0.999	0.892	399.66	5709.8	6.62	757.44	2814.73	58.11
Wavelength	1	2(QY=0.918544)	3(QY=0.960688)									6	26577242	44430348	0.366	0.82	399.66	9490.13	6.65	714	741.25	81.45
195.445	207.163	318.712	-462.132									7	23206838	53816195	0.431	0.843	399.66	8304.93	6.63	719.16	907.21	81.62
196.208	57.3792	-100.414	57.3792									8	16061510	73984405	0.561	0.891	399.66	5764	6.61	721.37	1275.28	80.39
196.972	143.699	-91.4449	52.2542									9	14616635	84084980	0.63	0.901	399.66	5227.28	6.64	720.63	1437.25	81.28
197.735	228.324	168.238	456.647									10	34668716	103089362	0.91	0.766	399.66	12429.6	6.63	770.66	2047.8	62.32
198.498	144.301	-66.6003	177.601									11	21938996	124387246	0.987	0.852	399.66	7871.76	6.64	769.92	2476.48	61.84
199.261	10.1753	-10.1753	264.558
200.024	476.71	168.25	56.0835
200.787	240.608	-180.456	-8.59316									Wavelength	1	2(QY=0.742123)	3(QY=0.875589)	4(QY=0.977785)	5(QY=0.999250)	6(QY=0.365902)	7(QY=0.431229)	8(QY=0.560732)	9(QY=0.630381)	10(QY=0.909595)	11(QY=0.986690)
201.55	118.303	205.059	-39.4344									195.445	286.841	-175.292	366.519	-159.356	79.678	47.8068	286.841	111.549	-366.519	127.485	0
202.313	-14.4628	43.3885	-108.471									196.208	258.206	444.689	301.241	372.965	71.724	-86.0688	-86.0688	-215.172	172.138	430.344	329.93
203.076	53.0936	-26.5468	192.464									196.972	274.335	535.606	-130.636	130.636	-26.1271	-143.699	104.508	222.08	-261.271	-39.1907	287.398
203.839	207.102	24.365	-103.551									197.735	-156.221	-84.1192	-168.238	504.715	252.358	72.1022	360.511	-144.204	252.358	372.528	-132.187
204.602	218.362	-33.5942	111.981									198.498	99.9005	-188.701	321.901	233.101	-99.9005	33.3002	-44.4002	188.701	-11.1001	0	199.801
205.364	61.907	51.5892	41.2713									199.261	132.279	183.156	132.279	0	-132.279	172.981	-223.857	-111.929	71.2273	-142.455	-274.734
206.127	-42.9026	-152.543	-76.2713									200.024	355.195	467.362	28.0417	168.25	-74.778	28.0417	-37.389	-121.514	-18.6945	214.987	280.417
206.89	-30.8812	74.9971	48.5275									200.787	103.118	-180.456	257.795	94.5247	-42.9658	-17.1863	85.9316	51.5589	326.54	498.403	8.59316
207.653	73.7578	49.1719	188.492									201.55	86.7557	220.833	94.6426	7.88689	-134.077	47.3213	134.077	339.136	189.285	260.267	110.416
208.415	103.003	57.2237	183.116									202.313	188.017	-94.0084	173.554	166.323	-72.3142	101.24	-79.5456	65.0827	202.48	159.091	180.785
209.178	114.087	0	24.9566									203.076	132.734	99.5506	86.2772	-73.0038	146.008	-33.1835	172.554	73.0038	258.832	19.9101	92.9139
209.941	10.027	13.3694	13.3694									203.839	140.099	207.102	-121.825	-182.737	73.095	-115.734	-48.73	109.642	97.46	67.0037	109.642
210.704	125.844	15.7305	69.2143									204.602	95.1835	223.961	39.1932	-27.9952	-16.7971	16.7971	-55.9903	83.9855	-50.3913	179.169	95.1835
211.466	38.601	-71.2635	29.6931									205.364	46.4303	-5.15892	56.7481	103.178	196.039	41.2713	20.6357	87.7016	170.244	61.907	-72.2248
212.229	-14.0608	75.9283	44.9945									206.127	71.5043	23.8348	23.8348	52.4365	104.873	-33.3687	23.8348	147.776	52.4365	114.407	57.2035
212.991	58.7225	0	18.6844									206.89	8.82319	8.82319	70.5855	141.171	-17.6464	105.878	26.4696	83.8203	-48.5275	52.9391	-97.0551
213.754	0	58.4078	22.8552									207.653	81.9531	86.0508	-86.0508	28.6836	32.7813	53.2695	86.0508	73.7578	12.293	36.8789	24.5859
214.516	21.7654	19.3471	-36.2757									208.415	57.2237	76.2983	45.779	-34.3342	26.7044	34.3342	41.964	11.4447	19.0746	45.779	41.964
215.279	64.5775	-50.7394	-6.91902									209.178	74.8697	103.392	53.4784	106.957	74.8697	24.9566	35.6522	7.13045	-78.4349	78.4349	85.5654
216.041	55.0603	-4.40482	-15.4169									209.941	110.297	143.721	23.3964	83.5585	40.1081	-20.054	56.8198	-3.34234	13.3694	83.5585	40.1081
216.804	-6.31562	-10.526	-21.0521									210.704	-12.5844	22.0227	18.8766	-28.3149	84.9448	-37.7533	62.9221	40.8994	-37.7533	-40.8994	72.3604
217.566	16.107	30.2007	44.2943									211.466	62.3555	32.6624	59.3862	29.6931	100.957	68.2942	-17.8159	-53.4476	59.3862	47.509	38.6011
218.328	34.7026	-75.189	7.71169									212.229	47.8067	44.9945	-70.304	25.3094	25.3094	81.5526	-25.3094	-129.359	2.81216	118.111	-11.2486
219.091	29.5643	-11.0866	79.4541									212.991	96.0914	61.3917	-13.346	64.061	-5.33841	42.7073	29.3613	-66.7302	5.33841	56.0533	61.3917
219.853	81.4737	49.5927	-51.3638									213.754	55.8683	-50.7894	-17.7763	60.9472	-2.53947	22.8552	-15.2368	2.53947	50.7894	96.4998	78.7235
220.615	44.1379	42.4402	18.6737									214.516	26.6022	4.83677	2.41838	29.0206	16.9287	-53.2044	-7.25515	2.41838	33.8574	38.6941	-12.0919
221.378	61.8376	-6.50922	29.2915									215.279	25.3697	43.8204	69.1902	29.9824	39.2078	55.3521	62.2711	25.3697	27.6761	66.8838	-18.4507
222.14	42.0907	21.8248	-15.5892									216.041	57.2627	66.0724	50.6555	22.0241	30.8338	-22.0241	-39.6434	-13.2145	55.0603	28.6314	-17.6193
222.902	46.2554	-4.47633	-37.3027									216.804	31.5781	48.4198	-18.9469	-35.7885	-14.7364	27.3677	21.0521	44.2094	33.6833	54.7354	42.1041
223.664	18.541	22.8197	2.85246									217.566	72.4816	-2.01338	18.1204	-26.1739	-2.01338	-6.04013	48.3211	-18.1204	8.05351	-10.0669	42.2809
224.426	4.08215	-16.3286	0									218.328	23.1351	23.1351	96.3962	-9.63961	-32.7747	-32.7747	50.126	-50.126	-23.1351	23.1351	21.2072
225.189	45.3201	-25.8972	34.9612									219.091	38.8032	72.0631	35.1076	81.3019	20.3255	12.9344	36.9554	-16.6299	-16.6299	0	-22.1732
225.951	34.4153	-12.2912	29.4989									219.853	70.8467	58.4485	54.9062	-24.7963	-21.254	-10.627	38.9657	21.254	37.1945	21.254	7.08467
226.713	16.2916	10.4731	-13.9642									220.615	39.045	6.79044	5.09283	-18.6737	-8.48805	44.1379	13.5809	39.045	27.1618	23.7665	-5.09283
227.475	47.28	30.787	2.19907									221.378	48.8192	42.31	47.1919	4.88192	81.3653	-21.155	37.428	-14.6458	-13.0184	14.6458	16.2731
228.237	16.6104	5.19076	-4.15261									222.14	14.0302	38.9729	24.9426	28.0605	42.0907	21.8248	28.0605	18.707	-3.11783	15.5892	4.67675
228.999	27.4419	-10.7807	4.90033									222.902	70.1291	-25.3658	16.4132	17.9053	-19.3974	-16.4132	35.8106	-19.3974	-31.3343	-17.9053	35.8106
229.761	35.1893	6.48224	25.0029									223.664	85.5738	5.70492	58.4754	11.4098	31.3771	-22.8197	4.27869	0	-17.1148	11.4098	-12.8361
230.522	7.01025	-0.876281	11.3917									224.426	32.6572	32.6572	-10.8857	21.7714	-35.3786	6.80358	-61.2322	-24.4929	-16.3286	19.05	23.1322
231.284	26.5901	-26.5901	-9.97129									225.189	33.6663	14.2434	-32.3715	18.128	-20.7177	28.4869	44.0252	9.06401	20.7177	3.88458	51.7943
232.046	22.11	15.0032	28.4271									225.951	29.4989	-3.68736	19.6659	3.68736	29.4989	22.1241	22.1241	-8.60383	38.1027	2.45824	9.83295
232.808	13.5412	2.25686	18.8072									226.713	79.1304	0	8.14578	17.4552	16.2916	-45.3836	11.6368	-9.30946	4.65473	-22.11	8.14578
233.57	6.46325	-8.61766	12.9265									227.475	17.5926	27.4884	19.7916	-6.59721	29.6874	27.4884	-14.2939	-4.39814	5.49767	0	6.59721
234.332	0.686979	6.18281	24.7313									228.237	13.496	44.6406	12.4578	9.34338	-16.6104	-21.8012	8.30522	-29.0683	17.6486	12.4578	6.22892
235.093	20.4104	-2.6336	5.92561									228.999	-6.86047	-2.9402	8.8206	31.3621	-11.7608	35.2824	-4.90033	32.3422	26.4618	-8.8206	37.2425
235.855	22.1219	4.42439	2.52822									229.761	-1.85207	12.9645	-1.85207	-0.926035	-24.0769	-8.33432	11.1124	13.8905	9.26035	-7.40828	15.7426
236.617	26.1301	12.7612	21.2687									230.522	0.876281	9.63909	27.1647	-6.13397	-7.01025	1.75256	0	7.01025	-3.50512	-11.3917	-2.62884
237.378	8.78192	-6.44008	4.68369									231.284	6.64753	15.7879	24.9282	5.81659	10.8022	27.4211	4.98565	-11.6332	-3.32376	11.6332	0
238.14	8.47823	1.13043	14.6956									232.046	4.73785	15.7928	-2.36893	5.5275	12.6343	-1.57929	9.47571	16.5825	-22.8996	-14.2136	18.1618
238.902	18.5843	2.18639	2.73299									232.808	36.8621	-0.752288	-3.00915	3.00915	3.76144	6.01831	-2.25686	-13.5412	22.5687	-8.27517	15.0458
239.663	9.53325	-2.64812	11.1221									233.57	2.87255	0.718139	-3.59069	10.7721	1.43628	0	15.799	3.59069	28.0074	5.02697	22.9804
240.425	25.1924	-2.05653	10.2826									234.332	-3.4349	-3.4349	24.0443	23.3573	8.24375	6.18281	20.6094	-5.49583	4.12188	6.18281	-5.49583
241.186	11.4938	3.99784	-0.999461									235.093	5.92561	-9.87601	16.46	27.6528	16.46	-6.58401	6.58401	23.044	9.87601	-2.6336	-4.6088
241.948	10.7001	14.5911	3.40459									235.855	12.0091	12.0091	21.4899	-1.26411	-18.9617	22.1219	15.1693	10.7449	9.48083	12.0091	6.95261
242.709	14.2223	3.7926	-5.21483									236.617	17.015	23.6994	34.6376	-4.86142	-12.1535	-6.07677	4.86142	15.1919	4.86142	0.607677	8.50748
243.471	-1.38746	-1.84995	12.0247									237.378	2.92731	15.8075	5.85461	14.6365	22.833	22.833	0	2.92731	7.611	15.222	-15.8075
244.232	23.0368	13.0994	14.0028									238.14	9.04345	20.3478	9.04345	5.08694	4.52172	3.39129	-5.08694	6.21737	10.1739	4.52172	8.47823
244.993	-7.9495	-14.5741	0.883278									238.902	22.9571	-3.82618	2.73299	-2.18639	1.63979	-4.37278	0	12.5717	6.01257	21.8639	1.09319
245.755	3.02504	9.93942	3.02504									239.663	11.1221	19.0665	11.6517	9.53325	20.1257	7.94437	3.17775	5.29625	11.6517	7.94437	20.6554
246.516	4.231	-2.5386	8.88511									240.425	11.3109	1.54239	-4.11305	3.08479	3.08479	1.02826	3.59892	24.1642	5.14131	17.9946	3.08479
247.277	4.14577	-7.0478	-4.14577									241.186	9.99461	15.9914	-2.49865	12.4933	6.99622	3.99784	7.49596	4.49757	12.993	16.9908	5.49703
248.038	-0.406321	9.34539	-2.43793									241.948	19.9412	-1.94548	-16.0502	-14.5911	-1.94548	6.80918	9.24103	-2.91822	11.1865	4.8637	-0.97274
248.8	7.1716	1.99211	0.796845									242.709	14.6963	4.74075	5.68891	3.31853	8.53336	4.26668	14.2223	0	9.95558	7.58521	-2.84445
249.561	7.42638	6.25379	4.69034									243.471	7.3998	-9.24975	11.5622	-2.77493	6.47483	15.7246	8.32478	4.16239	-3.6999	6.93731	-20.8119
250.322	14.1958	11.1264	2.68568									244.232	10.3891	12.6476	9.03403	3.16191	-6.32383	10.8408	15.8096	-5.42042	-4.51702	6.32382	19.4232
251.083	8.28921	-4.1446	-8.28921									244.993	11.9243	-2.64983	-7.9495	7.06622	-3.53311	-0.441639	-8.39114	3.09147	0	7.50786	8.39114
251.844	15.5568	-2.9632	4.4448									245.755	-8.64297	-2.16074	3.02504	7.34652	4.32149	0	-13.8288	6.48223	9.50727	-0.864297	2.16074
252.605	8.7478	-6.19636	5.46738									246.516	8.03891	7.19271	0.846201	1.6924	-0.4231	-3.3848	5.07721	3.8079	4.231	-2.1155	12.2699
253.366	10.0519	5.74393	-7.17991									247.277	13.681	-7.0478	12.0227	11.6081	-9.53526	4.97492	-14.0956	7.46238	2.07288	-16.5831	-0.414577
254.127	13.8056	-2.83192	6.72581									248.038	0.406321	4.46954	0.812643	12.1896	1.62529	8.53275	2.03161	8.53275	13.4086	2.84425	-5.28218
254.888	2.44646	-1.39797	6.29089									248.8	11.1558	2.39053	5.17949	1.19527	4.38265	6.37476	3.98422	1.99211	-0.796845	-8.36687	1.99211
255.649	4.83684	-9.32819	0									249.561	7.81724	0.781724	8.59897	-0.390862	0.781724	0	10.1624	-5.86293	5.47207	-10.5533	5.08121
256.41	15.3832	-4.78589	2.39294									250.322	13.0448	12.2774	4.60403	-6.13871	4.22036	-8.44073	20.7181	3.83669	1.15101	13.4284	-9.20806
257.171	9.14414	4.06406	4.7414									251.083	8.28921	-1.13035	4.52139	-0.753564	5.27495	-1.88391	-6.4053	-0.376782	13.9409	-1.13035	0
257.932	14.1044	-4.70148	8.73132									251.844	2.2224	1.1112	3.3336	-4.8152	-2.5928	1.852	1.852	4.4448	-3.704	3.704	5.556
258.693	8.6656	9.99877	1.33317									252.605	13.4862	-4.73839	0	-2.55144	1.45797	-2.18695	-5.83187	0	1.82246	-2.18695	12.7572
259.454	10.2578	6.94881	7.6106									253.366	10.4109	0.717991	1.79498	2.87196	-2.87196	-6.46192	0.717991	-2.51297	-6.46192	5.74393	-1.07699
260.214	13.8049	1.31475	1.64344									254.127	3.5399	13.0976	3.5399	-0.70798	13.0976	-1.41596	-2.83192	0.70798	8.84976	-1.41596	-1.76995
260.975	14.3709	3.59273	2.28628									254.888	9.78583	10.4848	11.5333	0	-2.09696	1.04848	1.04848	-2.09696	0.698988	-3.14544	5.94139
261.736	10.39	1.62343	-3.89623									255.649	19.0019	-2.76391	11.7466	4.83684	-3.80037	0.345488	-1.72744	11.4011	4.14586	1.03646	3.45488
262.496	18.405	-2.26026	3.87474									256.41	0.341849	4.44404	4.78589	-3.76034	4.78589	1.02555	1.3674	9.57178	-0.341849	4.10219	14.3577
263.257	4.1771	-6.42631	10.2821									257.171	3.04805	-1.69336	-10.1601	-2.70937	0.338672	9.14414	-6.43476	-4.40273	-3.72539	5.75742	1.69336
264.018	5.43923	3.5195	1.91973									257.932	6.38058	5.70894	11.7537	9.40296	3.69402	1.34328	-5.0373	0.33582	4.36566	7.38804	1.34328
264.778	12.1178	6.37781	-3.82669									258.693	11.3319	-7.33243	-9.66548	-2.99963	7.99901	8.33231	4.66609	3.66621	0.333292	6.66585	0.333292
265.539	3.49957	3.81772	-3.81772									259.454	9.26508	8.60329	-1.32358	4.96343	2.31627	3.97075	-2.64717	1.32358	5.62523	6.94881	7.2797
266.299	3.49501	0.953185	5.08365									260.214	-0.328688	0.328688	-0.986063	11.1754	0.986063	-10.1893	0	-4.27294	11.1754	7.8885	5.58769
267.06	11.1165	5.39943	-2.54091									260.975	16.3306	6.85884	14.3709	8.81851	11.758	14.3709	3.26611	6.85884	-5.55239	8.81851	12.0846
267.82	14.9324	3.81252	-3.49481									261.736	11.6887	5.19498	0	-0.974058	-0.649372	-0.974058	8.44184	-2.92218	0.324686	3.24686	3.57155
268.581	14.9354	3.8133	0.953325									262.496	4.84343	12.9158	0.968685	-4.52053	-1.61448	10.0097	2.26026	10.9784	-9.04106	0.322895	3.22895
269.341	6.03559	3.81195	4.44728									263.257	15.7444	-2.89184	-4.49841	2.24921	-5.14104	-1.28526	13.1739	3.53447	-2.89184	-3.85578	-1.60658
270.102	8.88378	-1.58639	0.634556									264.018	13.7581	4.47937	1.59977	-6.71905	3.19955	-9.9186	0.63991	8.95874	-5.11928	4.15941	0.319955
270.862	3.79891	0.949727	1.58288									264.778	11.4801	11.1612	-0.637781	4.14558	4.46447	1.59445	-2.87001	2.55112	1.59445	7.33448	-2.23223
271.622	4.41533	-3.78456	13.5614									265.539	6.36286	14.9527	-0.636286	-4.454	0.636286	-4.13586	-0.318143	-0.318143	2.86329	-3.81772	3.18143
272.383	9.72875	-4.70746	-3.45214									266.299	8.57867	6.99002	4.4482	1.58864	3.81274	5.08365	4.4482	-4.13047	3.17728	3.17728	7.30775
273.143	9.66939	-3.11916	-0.623832									267.06	11.7517	7.30511	5.71705	5.71705	2.85852	-1.90568	3.49375	-4.44659	-3.81136	-2.54091	1.27045
273.903	3.40527	8.97753	2.47656									267.82	11.4376	6.67191	-1.90626	4.44794	-2.85939	-2.85939	0.63542	3.49481	1.58855	1.90626	-4.44794
274.663	14.1115	2.76095	1.53386									268.581	8.57992	1.58888	1.2711	-1.2711	3.49552	0.63555	4.76662	8.8977	2.85997	4.13107	0
275.423	7.59477	0.303791	8.50614									269.341	6.35326	8.89456	-3.81195	-2.5413	6.98858	10.1652	-6.67092	3.17663	5.40027	15.8831	0.952989
276.184	14.1271	-3.00576	-3.30634									270.102	8.56651	0	4.44189	8.24923	1.26911	-3.49006	4.44189	5.711	-0.634556	7.29739	-7.61467
276.944	1.78327	0	5.05261									270.862	7.91439	3.48233	3.16576	-1.58288	-2.84918	2.84918	1.58288	-2.5326	-6.01494	1.2663	-0.633151
277.704	16.4488	-0.293729	0									271.622	10.0922	2.20766	0	9.77679	-0.630761	6.62299	-1.26152	-4.41533	-4.73071	6.62299	0.31538
278.464	4.93375	-1.16088	7.83596									272.383	10.6702	1.88298	5.02129	-10.0426	5.02129	-4.70746	3.13831	1.56915	-4.0798	7.53194	7.53194
279.224	3.15212	-3.72524	4.0118									273.143	19.0269	9.04556	-8.73364	10.6051	-5.30257	13.4124	-1.24766	0.311916	2.49533	3.11916	4.0549
279.984	7.91733	-0.282762	4.24142									273.903	9.90624	-0.61914	6.81054	0.30957	13.6211	5.57226	6.50097	3.71484	11.7637	1.23828	0.92871
280.744	11.4327	2.23077	3.90385									274.663	6.13544	3.68126	5.82866	-3.37449	0.920316	9.50993	8.89638	6.74898	2.76095	2.45418	4.60158
281.504	3.8485	-1.37446	10.7208									275.423	11.2403	4.55686	-2.43033	2.12654	8.50614	2.73412	0.303791	3.03791	6.07582	6.6834	2.43033
282.264	14.8968	1.6251	6.77125									276.184	8.71672	7.81499	6.01153	-5.1098	4.80922	0	-7.51441	3.90749	-4.20807	7.21383	3.30634
283.023	9.33711	-1.60065	8.80356									276.944	8.91637	-0.594424	-5.64703	4.7554	-2.08048	8.91637	-0.594424	1.78327	-2.97212	0.594424	7.72752
283.783	9.45763	6.30509	-0.262712									277.704	6.46204	2.34983	2.0561	-0.587458	11.7492	-4.40593	6.75577	7.04949	0	-2.93729	7.93068
284.543	5.94898	1.03461	7.24224									278.464	6.38486	3.48265	7.25552	-0.870663	2.32177	-0.580442	0.290221	2.32177	0.870663	11.0284	2.90221
285.303	11.4598	-2.03729	12.4784									279.224	9.74293	10.316	-3.15212	8.5967	-5.73114	2.0059	2.86557	1.43278	5.15802	-0.286557	-8.5967
286.063	3.25985	8.77653	-0.752274									279.984	14.9864	4.52419	10.4622	1.69657	-0.565523	4.52419	-0.282762	0.282762	-1.13105	1.97933	4.24142
286.822	7.90238	-6.91458	2.71644									280.744	12.5481	-9.20193	3.625	3.34616	-3.34616	11.7115	-4.46154	-0.278846	0	8.36539	-3.90385
287.582	0.243228	0.243228	4.62134									281.504	-1.09957	-0.274893	6.87232	-0.274893	-0.549786	-1.37446	-8.24679	-1.37447	6.04764	5.22297	4.12339
288.342	8.38458	1.43736	-3.59339									282.264	8.6672	0.27085	5.14615	3.2502	8.39635	-2.43765	-0.81255	-2.43765	7.31295	7.85465	-2.7085
289.101	16.7536	-3.77546	-5.42723									283.023	10.671	2.40097	1.0671	8.53679	3.73484	0.533549	-3.2013	7.73646	-2.1342	6.40259	-3.73484
289.861	3.02186	8.13578	4.41656									283.783	11.822	11.2966	-1.57627	5.77966	4.4661	-1.05085	5.25424	11.0339	7.09323	5.25424	5.77966
290.62	5.26799	-2.51947	-3.89373									284.543	12.9326	7.50089	-2.58651	1.03461	4.39707	-0.775954	-3.36247	2.58651	6.46629	-0.258651	1.81056
291.38	6.32274	-4.06462	11.0648									285.303	11.4598	11.9691	4.5839	3.81992	-13.7517	-4.32924	5.09323	-1.27331	1.27331	-5.85721	2.80127
292.139	13.5865	-1.55911	6.6819									286.063	1.50455	5.51668	1.75531	0.501516	-2.00606	-0.250758	5.51668	5.26592	0.501516	2.50758	3.51061
292.899	7.25558	2.85826	6.81585									286.822	8.39628	3.21034	-2.22254	-2.22254	0.740848	3.95119	9.87797	2.46949	-3.45729	4.44509	2.71644
293.658	10.2063	4.56025	0.43431									287.582	5.59425	2.67551	-0.243228	-0.972913	4.37811	1.21614	3.89165	4.13488	3.64843	7.29685	1.7026
294.418	5.79251	-3.64714	11.1559									288.342	19.4043	-1.1978	6.70767	1.67692	2.63516	-1.1978	11.4989	3.59339	-0.239559	-0.958238	5.03075
295.177	4.23972	2.33185	1.27192									289.101	4.95529	2.35967	4.2474	3.5395	0	1.65176	-1.65176	1.65176	0	2.8316	2.35966
295.936	10.2638	-3.35145	0.628397									289.861	6.50862	-4.64902	9.76293	0.232451	-2.78941	4.18411	4.64902	0.464902	9.53048	1.3947	1.62715
296.696	3.51906	6.83112	0.207004									290.62	2.97756	2.74852	8.24555	7.32938	1.83235	-1.6033	5.95512	9.39077	-6.64225	0.458086	2.97756
297.455	1.84166	3.47868	2.25091									291.38	3.613	1.12906	9.2583	5.41949	5.19368	8.80668	-5.19368	12.1939	4.96787	3.38718	7.22599
298.214	9.91585	2.63074	0.607093									292.139	13.8093	3.11822	7.12736	-3.56368	-0.89092	8.9092	-0.22273	1.55911	-3.78641	8.68647	2.2273
298.973	4.40421	-6.20594	4.20402									292.899	9.89397	3.07812	2.41853	6.59598	6.59598	2.41853	0.659598	-0.439732	-1.75893	1.53906	-3.07812
299.733	10.7057	-1.78428	0.991264									293.658	6.51464	-2.82301	3.69163	-3.47448	-2.82301	-0.868619	-0.651464	7.16611	0.434309	3.25732	-2.17155
300.492	10.6037	1.37455	8.05096									294.418	3.21806	3.64714	-2.35991	9.86872	5.36344	0	4.71982	-0.214537	4.50529	-3.4326	-4.71982
301.251	6.81292	7.39688	2.33586									295.177	9.75137	2.11986	-2.33185	4.45171	2.75582	6.1476	6.1476	3.60377	1.05993	0.423972	5.29966
302.01	0.579346	3.6692	1.15869									295.936	10.8922	7.3313	-1.25679	6.91237	6.28397	1.88519	7.75023	2.30412	2.72305	6.28397	3.97985
302.769	7.85697	1.91633	0.191633									296.696	6.21011	6.41712	1.86303	3.93307	0.207004	5.3821	0.414008	4.14008	1.65603	3.72607	4.76109
303.528	6.8477	0.190214	2.663									297.455	8.79902	7.16199	1.4324	-0.613885	1.63703	-1.4324	-2.04628	-2.04628	0.613885	-1.4324	7.16199
304.287	10.0123	2.07803	5.28953									298.214	6.47566	4.65438	3.84492	2.8331	5.05911	9.71349	0	4.24965	3.03546	3.23783	2.42837
305.046	4.12722	5.62803	6.00323									298.973	8.80843	8.20786	3.00287	1.80172	0.400383	-0.800766	0.200192	3.00287	3.00287	-0.800766	3.00287
305.805	4.28568	1.118	-0.372668									299.733	10.1109	3.56855	-0.991264	0.396506	5.35283	3.3703	2.37903	3.56855	7.93011	2.18078	7.33535
306.564	4.0745	-0.370409	-1.48164									300.492	4.32003	7.85459	4.51639	3.3382	-3.73093	3.73093	0.39273	7.2655	-1.57092	0	-0.39273
307.323	6.62656	-2.76107	6.07435									301.251	8.56481	-2.33586	4.47706	5.64499	-2.72517	3.50379	1.75189	2.72517	5.25568	1.36258	0.194655
308.081	0.914753	2.01246	8.78163									302.01	5.021	5.60035	-0.579346	4.82789	-2.12427	-0.772462	5.021	6.75904	2.5105	5.21412	2.89673
308.84	7.64227	-1.45567	6.55051									302.769	6.8988	7.09043	1.91633	3.64103	2.2996	3.4494	0.5749	2.8745	4.5992	3.06613	0.958167
309.599	10.8538	3.61793	5.6078									303.528	9.70091	7.22813	-0.190214	2.85321	3.04342	3.23364	3.42385	-3.99449	0.760856	-0.95107	0.190214
310.358	7.37214	0	1.07885									304.287	9.82342	1.70021	-0.566736	1.88912	1.70021	1.13347	5.47844	0.377824	0.755647	3.77824	-2.07803
311.116	13.2316	5.00656	-0.357612									305.046	8.25444	5.62803	-0.562803	1.31321	0.562803	-1.87601	1.1256	1.31321	-0.375202	4.50242	1.31321
311.875	1.06722	5.15824	1.06722									305.805	8.38504	4.47202	4.84469	4.47202	2.79501	0	4.47202	4.84469	-0.372668	1.67701	-0.186334
312.634	10.084	1.06147	6.01502									306.564	6.66737	3.51889	0.555614	1.85205	0	2.77807	2.40766	-0.370409	4.25971	10.5567	2.22246
313.392	5.63493	0.352183	-1.40873									307.323	8.2832	2.76107	0	7.73099	2.577	-1.2885	1.65664	-2.02478	-1.47257	-2.20885	2.577
314.151	16.4891	5.78873	-2.98207									308.081	8.23278	-0.548852	0.365901	1.64655	-2.56131	6.58622	5.48852	4.02491	0.365901	4.20786	-3.84196
314.909	12.5824	0.873778	0.873778									308.84	8.3701	7.82423	4.54897	-0.727835	2.36546	10.1897	4.18505	-1.27371	4.73093	3.27526	1.63763
315.668	7.83408	3.30772	4.35227									309.599	12.301	5.96959	-2.17076	5.4269	0	2.17076	-0.723587	3.43704	5.4269	8.14035	-1.44717
316.426	11.2755	2.60203	0.173469									310.358	7.73175	2.51732	2.51731	-1.07885	1.25866	1.07885	2.33751	1.07885	3.23655	7.01252	-7.19233
317.185	7.08682	2.24704	5.18548									311.116	8.04626	-1.07283	3.75492	-0.894029	5.90059	4.11253	0.715223	-0.894029	-1.78806	-4.11253	8.22507
317.943	12.0475	-2.4095	-0.688429									311.875	11.2058	1.42296	4.62462	0.711481	1.42296	-1.60083	0	-0.17787	1.06722	1.24509	-0.711481
318.702	11.6506	5.65396	2.22732									312.634	10.084	5.30737	1.4153	0	3.89207	1.59221	2.12295	7.2534	2.12295	9.90708	5.30737
319.46	9.89108	3.75179	3.75179									313.392	4.05011	7.21975	1.05655	2.81746	1.40873	-1.58482	3.69792	3.52183	1.23264	0.704366	0.880458
320.218	4.58188	-2.37579	7.12736									314.151	10.7004	2.45582	1.22791	-0.350832	4.03457	9.64788	-0.701664	1.57874	1.92958	0.175416	-4.3854
320.977	12.9992	0.675282	5.23344									314.909	12.4076	6.64071	1.74756	-0.699022	7.864	2.97084	7.864	0.174756	2.79609	4.89316	0
321.735	6.21715	-1.34425	2.1844									315.668	6.96362	3.6559	0	6.09317	-1.74091	2.78545	1.21863	0.870453	4.87454	2.78545	-5.04863
322.493	9.20375	1.67341	3.51416									316.426	11.7959	2.42856	3.12244	0.520407	0.867345	2.94897	2.2551	-0.520407	0	5.0306	2.60203
323.251	8.17105	-2.50134	2.33459									317.185	9.50671	5.18548	3.97553	3.45698	-1.90134	0.864246	0.864246	-1.38279	4.66693	10.1981	0.691397
324.01	7.47885	-0.99718	0.664787									317.943	9.4659	4.6469	-1.37686	1.03264	0.344215	0.172107	-1.03264	-0.860537	-0.172107	0.344215	3.44215
324.768	12.0986	2.65175	1.82308									318.702	9.59459	4.11197	2.22732	-1.54199	6.51062	0	1.54199	4.2833	8.22394	2.91264	3.25531
325.526	14.7096	-0.826381	-0.165276									319.46	13.1313	8.01518	-2.72857	6.99197	-0.852679	3.92232	2.55804	-0.170536	2.04643	10.2321	7.33304
326.284	5.76827	4.12019	4.94423									320.218	10.0122	9.50315	2.71519	3.73338	1.69699	1.52729	2.20609	3.56368	2.71519	0.848496	-0.678796
327.042	7.7236	5.09429	-3.45097									320.977	13.3368	-1.18174	5.57108	0.844103	4.22051	-0.506462	-2.36349	3.54523	0.337641	4.55816	2.70113
327.8	16.3944	0.327889	5.41017									321.735	8.90565	3.52865	1.51228	1.51228	-0.336062	4.03275	0.840155	4.36881	-2.52047	0.840155	2.35243
328.558	13.2465	6.54147	5.23317									322.493	13.7219	-0.669363	2.51011	0.334682	3.34682	3.34682	1.17139	1.67341	0.167341	3.17948	5.52225
329.316	15.6611	0.652546	4.73096									323.251	10.0054	-0.500268	0.667024	1.66756	3.83539	1.33405	-4.33566	-1.00054	-2.50134	10.3389	4.1689
330.074	12.2043	3.90539	-4.71901									324.01	10.3042	-0.49859	7.47885	7.64505	-1.49577	1.99436	-0.99718	3.65633	2.49295	6.64787	0.332393
330.832	7.78967	5.19312	4.05712									324.768	15.0818	6.62937	-2.32028	-0.828672	0.331469	1.16014	3.64615	-5.46923	2.81748	1.16014	3.48042
331.589	8.2535	5.17867	-0.4855									325.526	7.43743	3.14025	2.64442	-1.65276	2.97497	-0.661105	-0.991658	4.13191	0.330553	-1.15693	-2.47914
332.347	5.48784	6.13347	9.20021									326.284	9.22924	3.62577	0.494423	0.659231	3.13135	3.79058	0.329616	-2.30731	-2.30731	4.12019	9.88847
333.105	14.652	-0.966064	-0.161011									327.042	19.7198	3.45097	4.43696	2.79364	-2.30065	2.95798	2.95798	1.31466	-1.80765	1.47899	3.77964
333.863	11.8886	4.01643	4.65906									327.8	14.5911	4.09861	0.819722	3.11494	2.13128	3.93467	4.09861	1.14761	-3.11494	3.11494	-0.491833
334.621	12.9877	-1.60343	6.4137									328.558	11.284	-2.12598	0.49061	2.78012	-3.76134	0.163537	0.49061	-3.27073	4.41549	4.25195	-0.327073
335.378	9.91944	1.11994	3.67979									329.316	15.8242	6.36232	3.09959	3.26273	6.85173	2.93646	-1.95764	-1.14196	-1.46823	2.77332	6.68859
336.136	7.34139	1.11717	3.19191									330.074	12.3671	7.9735	-0.976347	-2.27814	8.94984	1.46452	-0.488173	2.44087	1.46452	6.83443	4.06811
336.893	15.7571	3.18325	3.34241									330.832	14.2811	6.00454	1.46056	1.78513	1.94742	5.19312	0.486855	-0.162285	-0.64914	9.89938	4.54398
337.651	13.6507	-0.317458	5.39678									331.589	14.2413	1.78017	1.13283	2.75117	0.4855	8.739	8.739	-0.4855	3.72217	2.913	2.58933
338.409	8.70774	-1.4249	-0.158323									332.347	22.9198	2.42111	0.484221	3.22814	1.12985	5.16503	3.22814	3.06674	4.35799	2.09829	3.22814
339.166	13.5879	4.58196	2.36998									333.105	18.3552	7.88952	2.57617	2.09314	5.31335	1.77112	-1.4491	6.11841	1.77112	6.60144	8.69458
339.924	14.2013	3.31364	0.473376									333.863	13.0132	7.8722	4.01643	2.89183	4.33774	4.4984	6.58695	-2.08854	2.57051	7.55089	0.803286
340.681	15.4489	3.15283	4.72925									334.621	13.7895	4.64993	2.2448	0.962055	1.1224	2.56548	0.320685	2.72582	2.56548	9.46021	6.73439
341.438	17.0131	2.83552	2.04788									335.378	18.239	6.87961	-0.319982	4.47975	4.63974	1.7599	2.71984	0.319982	3.67979	10.2394	-2.07988
342.196	15.1174	1.88967	4.25176									336.136	16.5979	2.71312	4.30908	4.78786	7.18179	3.83029	2.87272	3.83029	-2.39393	4.78786	-3.03231
342.953	17.0028	1.57434	3.30611									336.893	13.3697	4.93404	-0.477488	8.27646	1.75079	2.5466	0.795813	2.70576	5.25237	10.5047	1.11414
343.711	14.7925	-2.04577	4.87837									337.651	16.5078	10.7936	2.38093	1.26983	3.33331	-0.158729	3.96822	-1.74602	1.90475	11.111	3.49203
344.468	16.0471	9.28216	3.61847									338.409	16.1489	3.79974	7.12451	4.59135	-1.26658	3.79974	4.27471	1.58323	4.59135	2.8498	0
345.225	13.8417	6.13441	5.34795									339.166	19.5918	8.37393	2.36998	2.36998	1.57999	-0.157999	-2.21198	-0.789993	3.15997	6.31995	3.15997
345.982	15.4041	1.72903	5.34427									339.924	17.5149	5.9961	2.99805	6.31169	2.36688	2.36688	2.0513	2.52467	-0.157792	4.57597	-0.157792
346.739	18.9993	1.72721	2.04125									340.681	21.2816	5.51745	0	4.25632	2.67991	6.93623	1.73406	3.7834	-0.157642	5.20217	2.04934
347.497	15.2112	9.87943	1.72498									341.438	20.1637	6.14363	1.89035	7.0888	6.77374	2.99305	3.78069	2.04788	-1.73282	3.78069	7.56139
348.254	19.1046	8.76931	0.939569									342.196	22.2037	3.4644	7.24374	2.36209	7.24374	4.09429	5.98396	3.14945	3.77935	0.787363	5.35407
349.011	19.8516	3.12623	1.71943									342.953	18.1049	7.24194	8.97371	0	6.29734	6.92708	1.73177	3.46354	1.73177	3.30611	0.944601
349.768	15.4486	4.83743	0.78023									343.711	29.1129	5.66521	5.66521	2.04577	4.72101	4.56364	3.14734	3.46207	-0.786834	8.18308	4.24891
350.525	22.1274	-0.934959	4.98645									344.468	27.3745	2.98917	9.43948	7.07961	2.20255	7.86624	2.04522	6.13567	1.41592	10.8554	3.46115
351.282	23.3455	5.60291	11.3615									345.225	23.4366	8.02192	4.2469	5.19065	-0.62917	4.2469	1.88751	6.2917	1.88751	4.56148	4.40419
352.039	22.233	4.35332	7.77379									345.982	23.4205	11.946	5.65864	5.81582	2.9865	1.72903	2.67213	1.88621	7.54485	9.43106	4.55835
352.796	14.9159	4.8166	2.01986									346.739	24.652	6.90884	4.86759	4.55356	2.66933	2.82634	1.57019	1.41317	4.55356	4.55356	7.22288
353.553	23.3005	7.61151	6.67949									347.497	30.736	5.64539	1.09771	4.54767	4.07723	7.52719	4.54767	10.0362	3.29314	7.21355	2.82269
354.31	22.2092	-3.88273	2.32964									348.254	25.9947	4.22806	3.60168	2.50552	4.22806	6.42038	0.31319	3.44509	1.40935	10.4918	1.09616
355.066	20.8137	6.98966	3.10652									349.011	30.3244	10.4729	3.90779	4.22041	4.84566	-0.625246	5.78353	2.03205	4.84566	12.8176	5.00197
355.823	24.2293	3.72759	6.52328									349.768	24.8113	6.0858	2.18465	7.64626	0.468138	6.39789	5.30557	1.71651	6.0858	8.89462	5.30557
356.58	19.5655	5.43485	10.5591									350.525	25.2439	9.50542	7.16802	0.46748	5.2981	5.92141	4.20732	2.3374	8.41463	3.89566	8.57046
357.337	22.3391	5.89505	-0.310266									351.282	28.4815	6.3811	3.89091	7.47055	3.73528	11.6727	2.49018	7.31492	1.08946	5.91419	0.933819
358.093	27.108	6.97062	6.04121									352.039	32.8054	8.3957	5.90808	0.777379	4.35332	7.92927	5.59713	1.08833	2.17666	5.28618	2.02119
358.85	32.9191	6.95474	6.02744									352.796	33.0947	11.6531	10.0993	3.72898	1.86449	7.14721	4.97197	5.12735	5.43809	7.14721	9.63319
359.607	24.0455	6.31965	4.00758									353.553	30.6014	13.9803	4.66011	4.81544	4.1941	4.34943	7.92218	2.01938	1.86404	7.1455	0.776684
360.363	30.8806	0.768173	5.06994									354.31	28.7322	9.16325	4.50397	3.10619	7.76546	9.31856	0	5.90175	-4.65928	4.9699	8.07608
361.12	29.3932	5.35813	11.0224									355.066	29.0459	11.0281	4.8151	5.12575	4.65977	7.76629	5.59173	9.47488	4.1938	9.78553	4.8151
361.876	31.4115	4.11705	7.01423									355.823	35.4121	10.7168	4.8148	4.97012	8.38707	6.83391	8.23176	1.08721	4.03822	9.00834	5.28075
362.633	26.4188	8.0471	9.71725									356.58	33.0749	11.3355	11.025	7.76407	8.54048	6.98766	3.88204	1.39753	5.74541	10.0933	5.43485
363.389	32.1805	6.04329	9.06494									357.337	35.9908	7.29124	4.65398	4.80912	2.01673	8.06691	4.80912	3.41292	1.08593	6.05018	6.82585
364.146	31.71	6.46223	5.25995									358.093	35.7825	11.153	6.04121	7.59023	7.43533	5.11179	0.929416	-0.154903	2.78825	13.3216	7.28043
364.902	32.4269	6.42561	6.12674									358.85	40.1829	12.5185	10.5094	6.95474	3.86374	8.19114	10.2003	4.48194	2.7819	10.6639	4.01829
365.658	39.6648	3.71393	3.86249									359.607	39.3052	8.16931	5.85724	8.63172	10.1731	6.47379	5.24069	12.331	-1.07896	12.9476	14.1807
366.415	38.6869	8.85961	9.30259									360.363	33.4924	14.1344	7.22083	7.06719	7.06719	7.989	4.91631	4.14814	7.5281	13.6735	4.91631
367.171	40.072	7.33918	11.3023									361.12	40.8749	10.5632	13.4719	5.35813	2.44943	9.03227	4.2865	5.51122	6.73593	12.0941	11.1755
367.927	35.4691	9.04974	8.75781									361.876	39.3407	12.6561	8.38658	3.96456	5.94685	5.79436	10.5213	3.81208	4.72698	10.6738	5.03195
368.683	39.3459	8.27571	7.98534									362.633	38.5653	12.2984	6.37695	9.56542	3.7958	8.0471	3.64397	5.92145	0.75916	5.46595	5.92145
369.44	46.0662	11.1194	9.53093									363.389	44.2671	13.4463	6.79871	12.3888	4.68355	9.06494	7.10087	10.8779	6.79871	11.1801	4.83463
370.196	46.962	11.92	13.2126									364.146	46.2876	12.9245	11.121	4.05768	7.6645	7.06336	8.41592	8.86677	3.60682	11.4216	11.8725
370.952	53.9853	11.5683	17.4238									364.902	50.6577	16.8859	8.2188	5.23015	8.51767	9.41427	9.41427	8.51767	5.37958	8.51767	7.77051
371.708	58.2027	11.4986	9.79509									365.658	47.8355	13.9644	9.65622	4.90239	8.31921	11.1418	7.87354	3.56537	8.46777	11.8846	10.2505
372.464	56.5659	14.6705	11.9903									366.415	47.6942	16.9809	9.74557	13.1417	4.87278	10.4839	6.6447	3.83916	2.65788	12.2558	10.0409
373.22	62.937	16.4001	8.69064									367.171	56.5117	14.9719	10.862	10.7152	7.63275	10.7152	3.52281	9.39416	0.146784	15.7059	4.5503
373.976	67.6871	11.8383	11.8383									367.927	57.0717	15.0342	14.8883	8.31992	4.67083	10.2174	9.77956	7.29817	7.00625	15.6181	7.00625
374.732	74.6943	15.6305	15.6305									368.683	61.9953	17.4226	13.3573	11.1795	0.435564	11.7602	7.84015	1.74226	12.341	12.341	9.43722
375.488	72.4917	14.5532	17.0246									369.44	63.1063	18.6286	16.8957	12.2747	9.38652	14.5852	6.35395	3.75461	9.24211	15.7405	5.19869
376.244	83.618	23.1516	15.9337									370.196	71.6638	23.9837	11.202	16.6593	8.7605	12.6381	12.4945	4.30844	7.32435	16.8029	10.1966
377	94.7455	17.8154	17.0056									370.952	76.8362	19.9945	12.568	8.14064	9.99727	16.5669	9.85446	13.1393	8.42627	19.9945	13.1393
377.755	94.3464	21.1144	18.7089									371.708	77.367	19.5902	11.2147	10.3629	7.94964	16.0412	15.8993	8.37551	6.10419	21.7195	16.3251
378.511	101.421	21.818	18.6445									372.464	87.8817	27.5071	11.5671	11.8492	10.5797	20.5951	16.3632	7.0531	4.65505	23.5574	13.9651
379.267	101.751	22.2334	21.3179									373.22	92.6534	25.7916	19.2035	12.8958	9.11115	22.0069	17.5215	14.9984	6.02738	23.8292	14.5778
380.023	110.822	22.7593	22.5006									373.976	103.62	26.8798	18.9412	13.3703	14.3452	21.3089	14.6237	13.9274	9.47062	26.0442	17.1307
380.778	118.364	28.1211	23.136									374.732	107.2	30.1544	17.4287	21.5784	6.77782	22.6849	20.0568	14.5239	7.19279	23.5149	19.5035
381.534	126.867	25.3988	21.987									375.488	121.78	32.8135	15.9262	21.8299	14.8278	24.1639	19.3586	15.7889	11.9446	27.7336	15.6516
382.29	134.918	30.3565	24.61									376.244	125.699	37.4511	21.9259	17.8403	9.39682	17.4318	20.4279	15.6614	15.7975	26.8286	19.7469
383.045	142.081	29.1575	25.6981									377	128.622	31.7168	22.6741	23.7538	11.742	24.5636	19.3	13.0916	15.521	27.2629	15.7909
383.801	145.307	34.7075	27.6193									377.755	141.921	41.6942	26.9943	22.0498	20.7134	27.3952	20.9807	15.2344	11.6263	32.2061	20.8471
384.556	167.103	35.186	29.7449									378.511	147.569	41.917	30.5452	24.3304	16.1321	25.7849	26.1816	12.1652	16.1321	34.2477	22.0825
385.312	183.664	34.2201	32.0664									379.267	164.266	45.2515	24.7183	22.6258	16.0865	28.7726	22.7565	17.2636	15.6942	41.0664	22.1026
386.067	197.496	43.8091	36.8233									380.023	167.332	45.9065	28.5784	24.4404	16.8108	30.3888	24.9576	20.4316	17.1988	40.7339	22.3713
386.823	221.777	45.1052	42.9963									380.778	173.456	50.7458	31.9558	28.7602	15.4666	32.0836	27.8654	18.2787	15.8501	45.8885	24.2864
387.578	264.01	53.915	49.3931									381.534	182.34	55.0939	31.7169	25.2724	17.0589	33.1069	28.0524	21.987	20.9761	43.5949	29.0633
388.333	302.297	68.0571	51.301									382.29	196.505	57.2151	31.231	29.2322	22.1115	36.2279	28.8574	20.2377	18.9884	48.5954	35.1036
389.089	347.114	77.0355	65.1053									383.045	212.009	55.4733	31.752	33.9759	25.0804	33.3581	34.0994	26.4394	24.2155	49.7901	32.8639
389.844	417.374	87.7497	71.9998									383.801	224.865	61.1047	37.8849	35.0741	23.2198	41.6734	31.53	23.7086	22.8532	51.0836	29.5747
390.599	521.884	110.034	94.1085									384.556	240.498	64.2054	42.0781	37.967	24.5456	44.8591	36.637	28.6566	20.9181	56.9505	33.1305
391.354	736.733	154.272	131.225									385.312	260.121	76.2175	46.6638	34.5791	26.3232	48.6979	43.7922	26.0839	26.5625	64.1328	35.8952
392.109	1203.17	254.242	211.869									386.067	298.375	77.0803	50.6764	39.1914	30.3111	54.9389	45.5851	28.8903	31.8504	69.9761	42.5066
392.865	2234.81	456.461	389.274									386.823	344.322	99.8171	54.2433	48.9713	39.1302	61.8585	54.5948	35.3812	32.3351	82.5952	47.6826
393.62	4225.28	855.114	719.904									387.578	394.565	107.018	65.2778	58.4369	38.4942	66.6691	58.7848	42.6682	39.5377	93.9165	55.3064
394.375	7275.54	1485.06	1236.53									388.333	453.331	122.113	75.2874	69.8933	51.9896	80.2224	70.6967	54.285	44.1854	107.193	65.9913
395.13	11331.2	2341.22	1954.72									389.089	520.274	146.118	89.6476	79.4216	57.2654	94.6469	81.9213	57.1517	55.3338	123.62	78.5126
395.885	16258.7	3394.36	2837.7									389.844	618.298	169.087	102.487	90.7872	63.4498	110.362	103.387	66.1498	59.6248	139.5	91.5747
396.64	21701.1	4578.09	3808.32									390.599	780.71	204.811	134.536	117.274	81.5235	139.436	121.951	79.4075	76.1777	180.421	114.712
397.395	27062.4	5804.32	4819.48									391.354	1098.32	292.774	180.406	167.835	117.22	197.499	175.224	116.448	104.759	255.723	162.983
398.149	31717.6	6865.18	5719.91									392.109	1782.1	475.94	301.312	253.805	178.669	324.028	281.982	191.665	173.099	420.352	271.061
398.904	34596.4	7641.95	6309.23									392.865	3263.93	877.434	540.634	466.847	329.768	591.051	509.258	347.403	322.195	773.895	480.912
399.659	35049.6	7869.84	6511.9									393.62	6165.83	1621.88	1020.45	883.207	618.577	1107.09	963.411	660.288	594.773	1445.49	898.111
400.414	33021.4	7531.39	6220.57									394.375	10682.6	2824.81	1757.2	1529.61	1072.29	1908.15	1651.43	1137.13	1028.49	2487.94	1554.06
401.169	28917.5	6667.74	5487.65									395.13	16773.9	4436.68	2757.65	2415.65	1679.56	2968.3	2581.38	1784.88	1605.02	3901.12	2433.04
401.923	23525	5518.07	4524.23									395.885	24209	6417.4	4009.91	3504.08	2466.59	4300.27	3734.93	2554.87	2334.7	5600.82	3530.44
402.678	17725.2	4204.61	3452.43									396.64	32534.2	8645.11	5389.06	4767.34	3342.73	5778.77	5010.57	3456.2	3142.48	7513.88	4707.44
403.433	12076.9	2889.62	2361.66									397.395	40747.2	10902	6858.63	6003.35	4234.87	7263.39	6314.52	4344.95	3964.51	9447.87	5930.79
404.187	7159.42	1713.94	1398.57									398.149	47781.8	12864.3	8062.26	7118.78	5011.92	8519.09	7418.67	5135.09	4676	11147	6984.97
404.942	3579.24	858.355	688.318									398.904	52258.8	14149.4	8899.38	7867.61	5560.1	9370.75	8161.75	5631.22	5117.63	12166.9	7689.97
405.696	1575.87	372.816	298.853									399.659	52993.3	14433.8	9124.93	8078.79	5709.8	9490.13	8304.93	5764	5227.28	12429.6	7871.76
406.451	838.06	195.615	159.094									400.414	49913.9	13692.6	8653.27	7683.83	5462.59	8973.94	7851.55	5453.85	4956.4	11742.5	7477.39
407.205	631.247	145.03	119.132									401.169	43760.3	12086.1	7673.27	6805.2	4842.12	7920.91	6928.67	4802.83	4378.74	10339.7	6577.86
407.96	545.538	120.965	103.207									401.923	35755.1	9935.55	6333.11	5627.61	4023.18	6486.87	5683.47	3961.56	3622.43	8485.19	5398.4
408.714	475.122	111.084	90.7483									402.678	27037.5	7546.36	4827.32	4309.27	3062.46	4921.9	4311.05	2999.31	2742.36	6416.37	4116.75
409.469	415.918	92.9831	78.3215									403.433	18394.5	5195.65	3324.01	2971.09	2120.38	3354.38	2957.33	2057.19	1868.1	4379.24	2801.85
410.223	359.077	82.6827	66.4852									404.187	10980.7	3093.15	1995.01	1787.56	1274.31	2000.87	1774.85	1237.46	1128.06	2606.4	1664.28
410.977	317.185	69.7563	59.3491									404.942	5534.76	1563.4	998.334	888.705	643.766	999.793	882.187	623.144	564.293	1279.95	824.698
411.731	274.523	64.5223	50.3293									405.696	2453.84	693.16	446.294	391.5	284.622	438.937	383.077	276.296	248.318	559.465	365.458
412.486	238.837	52.9198	42.4103									406.451	1292.02	357.985	233.196	201.782	145.41	231.462	203.613	142.519	130.089	302.288	191.664
413.24	209.342	47.982	43.9063									407.205	957.086	268.287	171.408	148.004	108.293	178.219	150.69	104.265	96.0155	227.042	144.647
413.994	187.907	41.1422	36.8989									407.96	819.07	218.54	141.588	123.543	89.6499	153.713	132.231	87.8359	83.826	194.003	124.021
414.748	162.915	36.8466	30.874									408.714	718.765	199.646	128.283	112.414	79.4404	128.568	120.016	76.9698	66.8022	168.858	110.893
415.502	139.836	35.3251	24.2517									409.469	627.518	173.291	107.077	98.8478	68.484	113.131	101.591	70.2813	63.0923	148.414	97.1452
416.256	132.986	32.9047	26.4332									410.223	555.801	150.11	94.7367	85.5079	62.53	101.517	88.5214	58.7631	55.3729	126.661	81.4585
417.01	120.483	26.0577	21.5181									410.977	481.262	130.043	85.1327	74.6317	54.5674	86.6328	75.0068	54.2861	50.3483	114.667	71.9127
417.764	109.617	24.9623	21.3446									411.731	418.601	115.505	73.2996	65.5495	52.1034	77.2214	65.0826	47.8082	42.0189	96.1766	62.0012
418.518	107.374	25.3122	20.538									412.486	356.488	100.817	62.1273	58.5931	41.8522	66.9636	56.175	42.5963	35.9929	87.3316	53.2918
419.272	95.1888	23.5953	18.8404									413.24	314.754	90.9619	56.5038	49.5566	37.7927	58.9122	46.222	33.5318	33.1613	73.8255	47.4262
420.026	92.3011	22.2488	20.3724									413.994	279.786	78.6868	50.7359	45.8468	35.7919	52.4886	44.3709	31.0873	29.0579	67.6172	39.943
420.78	84.8077	17.2641	19.0439									414.748	243.408	68.3638	43.0949	35.6521	27.5661	44.3813	39.6032	27.8417	25.6364	58.9914	37.5817
421.533	85.0828	19.9413	16.5734									415.502	215.886	59.6682	38.6196	34.5014	24.7092	39.5348	35.5081	23.1535	21.8723	51.0658	36.5148
422.287	80.3984	17.9153	15.5325									416.256	197.884	58.153	35.2746	29.8057	18.8678	38.4648	29.8057	22.2403	21.6023	44.116	28.7119
423.041	76.9743	15.8166	14.8501									417.01	183.221	49.7549	31.3238	28.146	22.3352	31.6869	27.4197	19.5206	18.0679	45.5784	25.967
423.795	72.8661	18.9819	11.5466									417.764	163.974	49.7438	32.0169	26.4999	17.3651	28.9418	26.5903	21.3446	15.3753	37.5339	22.9726
424.548	68.6092	14.2791	13.8437									418.518	159.17	42.9678	26.3031	25.9428	17.6555	28.5551	25.1321	20.2678	16.5746	38.2836	22.9702
425.302	62.316	14.994	11.7872									419.272	148.391	38.7574	27.0943	23.6851	15.8798	25.7485	24.1336	15.5209	13.6369	36.335	22.6085
426.055	62.9001	9.05968	9.9225									420.026	139.122	37.7961	23.321	21.5339	15.726	21.5339	22.6062	15.0112	11.3478	33.6859	21.5339
426.809	58.4111	11.854	9.44886									420.78	136.511	37.9988	23.2264	23.4044	17.1751	22.5145	21.0907	12.8146	14.7724	30.3457	18.8659
427.562	54.2154	13.169	11.5443									421.533	126.118	34.299	23.4864	17.8142	14.6236	23.2205	20.9162	11.1671	15.6871	31.1084	17.2825
428.316	48.2695	11.5779	9.96037									422.287	119.494	31.6828	19.2391	15.9738	12.0024	20.4747	17.8271	12.3554	9.61957	27.0054	19.0626
429.069	53.2095	12.8787	11.2689									423.041	117.219	30.0516	21.001	19.1557	13.7077	19.8587	19.2436	12.3018	13.2684	27.4155	16.256
429.823	50.4244	8.76947	7.67328									423.795	106.369	31.4033	15.483	15.9203	10.7593	19.1569	14.6957	10.0595	9.09733	24.5803	13.646
430.576	47.8304	11.7478	7.88782									424.548	100.302	24.2918	20.8091	17.6747	12.4506	19.5902	11.9282	11.667	8.79381	22.7246	12.4506
431.329	43.0101	8.60201	8.76904									425.302	95.7707	23.5743	15.514	15.6007	12.5672	14.3873	14.4739	9.44707	8.49369	21.5809	14.9073
432.083	42.8822	8.2274	7.89499									426.055	89.8202	22.9512	14.8406	13.9778	9.9225	18.1194	16.6526	9.23224	10.3539	22.8649	16.3937
432.836	39.4477	7.69106	7.93916									426.809	85.8988	22.2478	15.4618	11.3386	9.36296	16.4926	14.7746	10.9091	8.16038	18.2105	10.9091
433.589	36.9501	7.48878	6.99502									427.562	82.2637	21.0363	12.998	11.9719	11.8863	14.6228	13.5966	8.29478	5.55836	20.0956	13.9387
434.342	33.4058	7.94207	6.22265									428.316	77.7249	20.0059	13.5359	12.1738	11.3225	16.2601	13.1954	9.27932	4.59709	18.3884	11.663
435.096	32.5833	8.71603	6.27229									429.069	76.5946	21.5211	14.1497	11.1842	8.04921	14.1497	13.2177	9.15068	7.03247	16.2679	11.0147
435.849	33.0662	9.80638	5.8352									429.823	70.3244	16.2741	13.0699	9.44404	6.5771	11.2991	9.61269	10.2029	9.10675	14.8406	8.5165
436.602	32.2535	8.14401	7.57958									430.576	68.3891	19.4678	11.0765	11.9996	8.3913	11.4961	11.4122	6.62913	8.72695	13.3422	11.58
437.355	29.6004	4.81307	6.01634									431.329	64.2228	16.6194	10.2723	11.6085	5.51197	11.2745	9.18662	6.59766	7.43281	16.4524	10.6064
438.108	28.0164	6.54514	4.62949									432.083	63.243	17.1197	8.2274	8.97535	8.06119	10.7206	11.4685	4.15526	4.65389	14.0448	10.8037
438.861	25.0948	4.05011	4.28835									432.836	58.7167	18.8555	11.4952	10.999	5.45817	9.17966	9.42775	4.79658	6.86407	17.3669	10.4201
439.614	25.3655	4.82023	3.39787									433.589	57.2768	15.8005	9.46384	8.88778	7.48878	9.62843	8.14714	3.70324	4.93766	13.0025	10.9451
440.367	25.7147	5.50468	4.56102									434.342	58.6239	11.7903	7.45081	11.3809	6.0589	8.84272	11.299	9.66149	5.64951	8.84272	9.17022
441.119	22.7016	5.40142	3.28782									435.096	53.0293	12.9519	9.77499	8.47166	3.01396	6.92395	6.35374	5.37624	7.08687	14.9069	9.93791
441.872	23.0687	3.03945	4.52021									435.849	52.2737	16.2899	8.67176	11.7515	6.96983	11.5083	7.37505	6.80774	4.3764	13.6965	7.94236
442.625	18.0822	5.27722	5.19961									436.602	46.8482	12.6595	5.88627	8.46655	5.07993	11.1275	7.49894	3.22535	5.4831	13.1433	7.33768
443.378	19.9392	2.78222	5.40987									437.355	44.7616	9.70636	10.3481	7.46026	6.41743	8.18222	5.45481	5.77569	5.8559	8.02178	7.21961
444.13	22.0137	7.54316	3.84855									438.108	43.5012	8.62042	7.02405	10.137	5.34786	6.06623	5.82677	5.02858	3.43221	8.46079	5.58731
444.883	18.7811	3.90954	4.21617									438.861	40.3422	12.6268	7.86197	7.06783	4.76483	5.47956	5.40014	4.36776	2.77949	8.89435	7.30607
445.636	20.9951	3.05384	5.87863									439.614	37.6926	9.95654	6.16357	5.68945	2.92375	6.08455	6.16357	4.42513	3.71395	8.53418	6.87475
446.388	19.6941	2.28117	4.86649									440.367	35.9377	8.25702	6.29106	7.86383	2.43779	6.84153	5.03285	5.89787	1.6514	7.07744	5.26876
447.141	16.5107	4.16554	4.99865									441.119	36.4009	6.7322	4.2272	5.40142	5.87111	7.51501	3.83579	4.46204	3.83579	5.71454	6.26251
447.893	16.4451	3.3192	2.4894									441.872	33.9795	10.8329	6.07891	7.4038	3.11739	6.39065	4.13054	2.72771	3.74087	7.87141	3.35119
448.646	16.3054	3.83214	2.10392									442.625	31.3529	6.90695	3.7251	4.50116	3.7251	5.89807	4.73398	4.96679	4.50116	5.97567	3.18185
449.398	18.4879	5.16462	2.09579									443.378	31.3	11.1289	2.47308	4.71432	3.40049	4.55975	4.40518	2.47308	1.70025	7.41925	3.16864
450.151	16.1059	1.11846	3.57908									444.13	31.6351	8.2359	5.8498	6.08071	2.23216	4.61826	4.69523	1.92428	3.38673	10.4681	2.9249
450.903	16.9363	1.26279	4.15979									444.883	28.3633	8.35568	5.0594	3.14296	3.52625	4.67611	3.14296	4.13951	3.0663	7.97239	3.21962
451.656	16.8723	3.77407	4.73609									445.636	27.8663	7.78728	4.42806	3.6646	2.36672	5.72594	2.44307	3.35922	2.13768	7.25286	4.27537
452.408	17.7685	1.8432	1.10592									446.388	26.0053	6.00707	3.26967	2.81344	2.66136	4.25818	3.57383	3.64987	0.456233	5.70292	2.7374
453.16	14.472	0.587697	2.35079									447.141	27.7955	5.45307	4.31701	6.05897	4.99865	3.55964	5.90749	3.55964	1.43901	5.3016	1.96917
453.912	14.4931	3.22069	2.19593									447.893	25.3466	6.94014	4.149	1.35785	5.95947	2.86658	5.50685	3.77182	3.69638	5.65773	4.9788
454.665	14.8801	3.57415	4.8871									448.646	25.9985	8.11513	7.51401	4.05756	1.72822	4.95924	4.20784	4.20784	1.57794	6.91289	2.32934
455.417	16.5014	2.10811	2.47158									449.398	26.0477	4.86522	5.68857	3.81733	1.64669	3.74248	4.86522	2.76944	2.91913	6.21252	5.38917
456.169	13.1122	4.70881	3.25995									450.151	24.1588	5.36862	2.908	4.62298	2.908	3.20626	4.54841	4.10103	1.49128	5.96513	3.9519
456.921	14.2934	2.38223	2.67099									450.903	23.7703	2.67415	3.93695	3.11985	3.93695	6.46254	3.11985	1.85705	2.22846	6.16541	5.42259
457.673	14.4598	4.89186	2.51787									451.656	24.5684	6.95613	5.92011	3.62607	2.96005	4.95809	3.40406	0.962018	3.62607	6.58612	5.4761
458.425	13.4063	1.43383	2.72428									452.408	21.8235	6.5618	6.48807	3.61267	0.958465	3.09658	2.87539	2.28557	3.61267	5.5296	4.57114
459.177	12.1457	4.85826	3.57225									453.16	20.4959	6.83198	3.15887	1.68963	3.45272	4.18734	3.37926	5.21581	5.4362	4.11388	3.45272
459.929	14.3836	4.55717	4.69958									453.912	25.6923	6.95377	4.46505	2.12273	1.90314	2.41552	4.68464	2.78151	2.63511	4.09906	3.0743
460.681	13.4855	2.62612	1.63245									454.665	22.3931	3.72003	3.64709	2.48002	2.91767	3.1365	4.52239	3.20944	0.583534	5.10592	2.91767
461.433	12.3821	4.59907	0.919814									455.417	19.1911	4.65238	1.89003	2.68966	4.79776	4.07083	4.87046	1.81733	-0.508854	4.72507	3.78006
462.184	14.8133	3.3859	2.60996									456.169	22.5299	7.09944	1.15909	2.6804	3.47728	2.60796	2.60796	-0.289773	3.62216	5.14347	3.83949
462.936	9.9176	3.37621	0.28135									456.921	23.4614	2.5988	1.37159	4.76447	2.16567	2.95974	2.5988	0.794078	1.73253	3.39288	2.5988
463.688	10.9426	4.13856	1.82377									457.673	19.7833	5.68319	2.9495	1.79848	2.51787	5.10768	1.58266	0.719391	-1.00715	3.38114	1.43878
464.44	11.9637	4.19778	3.778									458.425	22.0093	6.23717	3.3695	2.36582	1.64891	3.22612	1.50552	1.43383	0.860299	6.09378	2.36582
465.191	12.0733	3.41962	3.00089									459.177	21.2192	4.64393	3.42936	3.21503	1.71468	4.42959	0.357225	2.2148	4.2867	6.78728	1.71468
465.943	11.2083	2.64543	1.11386									459.929	20.0088	6.1949	2.99064	3.27546	2.70582	2.5634	0.284823	2.42099	2.42099	5.55405	3.13305
466.695	12.0839	2.70845	3.75017									460.681	20.938	6.45884	4.96834	1.34855	3.33589	1.63245	2.91003	2.05831	3.33589	2.6971	2.48417
467.446	12.4017	2.63276	3.25631									461.433	18.3255	6.79247	2.61793	2.68869	1.76887	2.61793	2.12265	3.32548	0.566039	1.83963	2.8302
468.198	10.921	3.66337	0.345601									462.184	20.3859	5.64316	3.66805	1.55187	1.55187	3.24482	2.6805	2.25726	2.6805	4.16183	1.83403
468.949	10.3444	2.55163	1.862									462.936	17.7251	3.86857	3.23553	3.93891	1.75844	3.86857	1.47709	2.03979	2.88384	3.16519	3.23553
469.701	12.3175	0.688128	4.19758									463.688	17.3258	4.62957	2.87595	0.210435	3.71768	1.96406	1.47304	3.85798	1.82377	3.4371	5.05044
470.452	9.54448	0.617988	4.11992									464.44	19.8695	6.92634	1.53919	1.81904	4.33771	4.5476	1.3293	1.3293	1.74907	4.33771	2.51867
471.203	9.66119	2.12409	2.32965									465.191	19.75	3.69877	4.95495	4.81538	1.32597	1.60513	1.81449	0.697881	3.34983	3.97792	0.488517
471.955	11.7614	2.73521	2.53007									465.943	16.2206	4.03776	0.835398	4.80354	0.905015	2.78466	1.18348	3.55044	1.87965	3.41121	2.15811
472.706	11.6692	3.75326	1.56954									466.695	17.7091	5.90304	2.15287	2.98624	2.08343	2.50011	3.26403	2.36122	2.36122	4.09741	3.19459
473.457	10.557	3.40549	3.47359									467.446	16.628	5.33481	2.0785	2.0785	1.17782	1.38566	2.35563	2.84061	0.900682	2.14778	4.157
474.209	11.5573	1.49565	2.92331									468.198	17.1418	4.14721	0.760322	5.18401	2.4192	3.87073	3.45601	0.276481	3.38689	3.04129	2.21184
474.96	10.7235	2.91841	-1.08592									468.949	18.8958	6.41355	3.65504	3.10333	1.58615	2.13785	2.48267	1.862	1.79304	2.82748	0.896518
475.711	10.1639	1.15191	1.76175									469.701	15.6893	3.99114	2.27082	3.09658	2.89014	4.74808	2.95895	1.72032	0.688128	4.05996	3.30301
476.462	11.976	1.62387	3.38306									470.452	15.999	3.77659	3.70793	3.70793	1.44197	1.37331	1.51064	1.02998	1.37331	5.01257	2.54062
477.213	11.08	2.56731	2.77									471.203	14.3205	3.42596	3.01484	3.90559	2.12409	3.97411	1.4389	1.91854	1.85002	6.23524	2.19261
477.964	8.63491	3.03571	0.742063									471.955	17.2318	4.58147	1.0257	1.09408	1.84626	4.17119	2.73521	1.7095	2.32492	2.94035	1.64112
478.715	6.93719	1.01027	3.83903									472.706	15.6955	6.75587	2.93437	4.02623	3.27557	1.36482	5.80049	2.45668	3.07085	3.27557	1.77427
479.466	9.34618	0.672387	2.82402									473.457	17.6404	5.04012	2.1114	1.49841	2.52006	0.953536	3.13305	1.49841	1.49841	3.40549	1.15786
480.217	9.6647	4.42966	1.00674									474.209	15.7043	4.82686	2.78734	2.65137	1.29169	2.03952	2.65137	2.1075	2.5154	4.82686	4.01105
480.968	9.17764	0.334951	2.14368									474.96	15.135	4.61517	1.56101	1.76462	0.610831	2.7148	3.59712	3.8686	0.27148	4.61517	3.39351
481.719	10.3638	1.87217	1.33726									475.711	14.9749	2.37158	2.10055	3.86229	0.948634	1.55847	3.65902	1.28743	-0.406557	3.79454	1.96503
482.47	9.47712	2.06895	0.400442									476.462	14.1412	5.20991	1.42088	2.97709	1.55621	2.97709	4.60095	1.55621	1.69153	3.85668	2.77411
483.22	9.2603	3.06456	-0.066621									477.213	15.3363	3.24292	3.85097	3.78341	1.08097	2.77	3.31048	3.1078	-0.337804	4.52658	1.8917
483.971	9.57714	1.86222	3.3254									477.964	13.9643	3.44047	2.83333	3.84523	2.29365	4.51984	-0.809523	0.269841	3.17063	3.23809	4.31746
484.722	9.42899	0.664014	3.85128									478.715	12.5947	4.64724	1.07762	1.54908	0.673513	3.09816	3.97373	3.30022	1.75114	4.984	3.50227
485.472	9.68065	1.52503	3.05007									479.466	14.1201	4.1688	4.63947	3.63089	3.83261	3.63089	2.62231	0.605148	1.68097	2.55507	0.941342
486.223	7.68097	-0.595937	1.65538									480.217	12.8192	3.7585	2.61752	1.87925	3.42292	0.67116	2.21483	2.01348	-0.33558	4.09408	2.9531
486.974	9.25863	0.595198	1.25653									480.968	11.6563	3.28252	2.21067	1.60776	3.55048	0.870871	3.28252	1.07184	1.54077	3.41649	2.07669
487.724	9.24829	1.4533	1.25513									481.719	10.8987	4.3461	2.67452	1.60471	1.40413	3.87806	0.601768	2.67452	2.13962	4.14551	3.54374
488.475	9.04174	0.461987	2.37593									482.47	13.4148	3.93768	6.00663	0.600663	3.4705	0.667403	0.934364	3.13679	0.600663	3.4705	3.67072
489.225	5.67076	1.78036	1.64848									483.22	12.3249	2.46497	4.53022	1.86538	2.66483	0.866071	2.73145	2.59821	1.86538	2.59821	0.266483
489.976	6.78645	3.03084	2.56963									483.971	15.0973	3.79095	2.19476	1.26365	3.52492	2.92635	1.72921	1.52968	1.6627	3.72444	1.06413
490.726	8.29584	2.10688	2.43608									484.722	14.5419	2.92166	-0.664014	2.45685	1.59363	4.18328	2.58965	2.12484	2.85526	4.44889	2.78886
491.476	8.42191	-0.328981	3.68458									485.472	11.0068	1.1272	3.11638	2.58593	2.85115	2.58593	1.52503	2.18809	1.79026	2.58593	2.91746
492.227	7.82502	3.81387	3.74812									486.223	14.3687	1.05944	1.7216	1.65538	0.794583	2.31753	1.58917	1.25809	2.31753	-0.066215	2.71482
492.977	9.46457	2.30042	-0.131452									486.974	13.1605	3.43892	2.57919	0.198399	1.65333	1.91786	1.3888	1.85173	2.64532	0.793597	4.49705
493.727	6.70166	1.90537	0.657026									487.724	12.6173	2.24601	1.32118	4.35991	3.30296	3.03872	3.43508	-0.79271	-0.198178	3.03872	2.24601
494.477	7.15951	2.03619	2.43029									488.475	10.8897	4.28988	1.45196	1.58395	1.58395	2.83792	3.6299	1.64995	0.791977	1.45196	1.45196
495.228	8.86529	2.62675	-0.459682									489.225	12.9241	4.41792	3.95635	0.263756	1.25284	1.78036	2.43975	1.1869	0.593452	4.2201	1.45066
495.978	6.76199	1.31301	2.10081									489.976	10.0808	1.97663	1.77897	2.63551	1.12009	0.988318	1.71308	1.25187	1.51542	1.44953	3.16262
496.728	8.07345	1.70658	-0.393827									490.726	10.2052	3.9504	1.3168	-0.13168	2.6336	3.75288	1.51432	2.23856	1.646	3.02864	0.92176
497.478	7.87601	2.42844	-0.065633									491.476	11.6459	2.89503	3.02662	3.22401	1.31592	1.57911	1.11854	0.526369	1.18433	3.22401	2.03968
498.228	7.41675	3.15048	1.77214									492.227	12.7568	5.72081	1.77542	4.40568	0.065756	4.40568	0.526052	3.87963	2.36723	3.48509	0.591808
498.978	6.62999	1.24723	1.31287									492.977	11.3706	3.81212	2.10324	3.41776	1.64315	-0.722988	1.90606	1.64315	-0.131452	2.89195	1.31452
499.728	6.95993	1.44451	1.44451									493.727	13.2062	2.6938	4.40207	2.75951	2.16818	2.6938	2.03678	1.24835	1.18265	0.52562	2.5624
500.478	8.40502	0.590978	1.96993									494.477	12.0858	3.94101	5.38605	1.90482	1.11662	3.02144	0.262734	2.36461	1.44504	5.32037	0.985253
501.227	7.74695	1.70696	-0.131304									495.228	9.45631	3.34911	1.97006	2.62675	0.853694	1.77306	2.29841	0.853694	0.722357	1.97006	1.70739
501.977	7.94165	0.525068	1.64084									495.978	12.4079	2.23211	2.42906	0.984755	1.37866	2.49471	1.18171	3.15122	2.03516	2.69166	0.656503
502.727	4.91973	1.63991	2.09909									496.728	6.56378	0.525102	2.03477	-0.459465	1.50967	1.64095	4.26646	0.393827	2.23169	3.21625	1.70658
503.477	6.55478	0.589931	3.53958									497.478	10.5013	3.938	2.9535	1.5752	-0.131267	0.328167	1.44393	2.9535	2.62534	2.29717	-0.590701
504.226	4.78124	0.327482	3.01284									498.228	10.961	4.135	2.10032	1.18143	1.83778	3.80683	2.29722	1.24706	0.656349	1.57524	2.36286
504.976	5.30068	1.63601	0.06544									498.978	10.9625	1.9693	1.05029	0.919008	3.67603	1.9693	0.590791	2.88831	-0.853365	1.77237	2.29752
505.726	6.01415	2.15725	1.56891									499.728	9.455	2.56073	2.03545	1.11622	1.90413	4.00525	1.57583	0.919236	0.459618	1.90413	3.21733
506.475	7.83536	0.97942	2.02413									500.478	8.53635	4.20251	1.70727	0.656642	1.37895	3.02056	1.90426	3.41454	2.82356	4.79349	-0.590978
507.225	6.19446	2.6734	2.41258									501.227	9.12565	4.00478	0.393913	1.31304	1.6413	1.05043	2.56043	0.262609	1.57565	3.74217	2.88869
507.974	6.57494	0.84628	1.36707									501.977	10.6326	3.28167	2.03464	1.70647	2.69097	1.44394	1.5752	1.1814	2.23154	2.88787	2.55971
508.724	5.39303	0.259905	0.389858									502.727	9.83947	3.739	2.16468	1.50872	2.82065	1.44312	1.57431	0.590368	2.42707	1.70551	1.44312
509.473	6.09467	1.16707	3.43636									503.477	10.291	2.81856	1.6387	0.458835	1.04877	0.196644	-0.327739	0.852122	2.8841	2.29418	1.76979
510.223	6.85628	1.87577	1.35832									504.226	8.31805	3.6678	3.27482	2.16138	1.44092	2.88185	1.76841	-0.130993	1.11344	-1.04794	3.6678
510.972	4.70977	0.064517	1.74197									504.976	9.55431	2.35586	2.68306	1.24337	1.96321	3.33746	0.785286	1.04705	0.523524	2.29042	2.55218
511.721	8.04298	0.450407	1.28688									505.726	11.1785	2.15725	2.15725	0.261485	2.35336	1.24205	2.15725	1.76502	2.15725	3.3993	0.980568
512.471	5.83951	0.770045	3.40103									506.475	9.07596	3.78709	2.35061	2.28531	2.28531	1.89355	0.587652	1.2406	0.261179	2.74238	2.93826
513.22	6.52794	0.959992	1.85598									507.225	8.80265	2.60819	3.39065	3.65147	1.56492	2.02135	0.782458	3.32545	1.63012	3.12983	2.6734
513.969	4.78783	-0.191513	1.85129									507.974	8.07221	4.0361	2.60394	2.14825	0.976477	1.17177	0.065098	1.69256	2.01805	2.21335	1.10667
514.718	4.96643	1.91017	1.97384									508.724	9.09668	3.18384	1.42948	0.909668	0.779716	2.01426	0.324881	-1.16957	0.974645	1.29953	0.844692
515.467	5.081	0.127025	3.17563									509.473	10.3739	2.4638	-0.84288	1.55609	1.10223	2.26929	1.94511	2.13962	0.583533	1.68576	4.14956
516.216	5.25802	0.570147	1.83714									510.223	7.30905	2.26387	1.423	3.42814	1.48768	1.48768	0	-0.970228	0.776182	2.45791	4.13964
516.965	5.62404	1.20064	1.32702									510.972	8.06467	3.03232	0.322587	1.61294	2.06456	1.61294	1.87101	0.387104	0.387104	2.51618	1.16131
517.714	5.92468	1.26057	2.01691									511.721	8.94379	1.60859	1.93031	1.99466	1.09384	2.18769	0.579094	2.57375	-0.128688	3.53891	2.6381
518.463	6.41327	3.58389	0.691627									512.471	8.98386	1.79677	0.256682	1.15507	1.15507	1.7326	2.11762	1.0909	2.1818	2.8235	3.4652
519.212	5.58234	0.564506	2.32075									513.22	11.1359	3.13597	2.49598	3.39197	0.831993	0.895992	3.58397	-0.063999	0.447996	3.58397	3.19997
519.961	4.75576	2.81591	2.065									513.969	8.23506	3.76642	1.97897	2.93653	1.53211	0.255351	2.68118	3.19189	1.46827	1.34059	1.97897
520.71	3.05911	1.43591	1.18619									514.718	7.51333	4.32971	1.20977	2.92892	0.636723	-0.254689	2.16486	1.78282	2.16486	1.91017	1.71915
521.459	5.23281	-1.3082	1.93116									515.467	5.71612	3.49319	1.0162	1.96889	1.33376	2.41348	-0.190538	0.76215	1.14322	3.17563	0.571613
522.208	5.22203	2.11368	1.11901									516.216	6.84177	2.78739	1.52039	2.21724	1.39369	1.96384	0.253399	0.950246	1.26699	1.45704	1.58374
522.956	4.65407	2.54422	3.78531									516.965	7.51978	3.22276	3.60191	2.27489	0.315957	2.40127	2.14851	0.505531	0	2.14851	0.063191
523.705	3.84147	2.10662	1.6729									517.714	8.1937	3.46657	2.89931	0.693314	1.3236	0.756342	1.82783	0.945428	1.51268	1.82783	1.19754
524.454	4.76485	2.22772	0.804454									518.463	7.73365	2.70363	3.33239	2.82938	0.503002	2.13776	1.76051	0.251501	2.32638	2.01201	2.20063
525.202	6.43001	1.54567	2.65856									519.212	6.52318	0.313614	1.94441	1.94441	0.564506	1.31718	0.940844	1.00357	0.188169	2.13258	0.188169
525.951	6.79723	3.21324	0.679724									519.961	10.0121	2.75333	1.25152	1.68955	-0.500606	2.25273	2.37788	1.00121	1.8147	2.87849	0.938637
526.699	4.50967	2.40928	0.864868									520.71	7.679	1.24862	2.68453	1.99779	0.374585	2.12265	0.874033	1.24862	2.12265	1.6232	1.68563
527.448	3.83033	-0.185338	2.34762									521.459	8.53446	1.86886	2.05575	1.3082	0.498363	1.12132	0.872135	0.747544	0.186886	2.36722	2.49181
528.196	4.14108	1.54518	-0.309035									522.208	6.09237	3.17052	-0.435169	1.36767	3.29485	1.18117	2.30018	1.67851	2.73535	1.74068	0.994672
528.945	5.8758	2.10292	1.48441									522.956	6.70185	1.98573	4.40585	1.73752	0.930813	2.10984	2.66833	2.66833	0	3.35093	2.1719
529.693	4.95309	2.47654	1.98124									523.705	7.55903	0.86743	1.9827	2.10662	0.743511	3.84147	0.433715	-0.123918	2.66425	1.05331	0.681552
530.441	3.34801	0.372001	2.108									524.454	6.74504	0.742573	-1.73267	1.2995	0.247524	1.91831	1.42327	-1.23762	0.990098	4.39356	0.928216
531.19	4.96859	1.49058	2.85694									525.202	7.23376	2.78221	-0.865578	1.42202	1.97846	1.17471	2.2876	0.556443	1.36019	3.15318	3.02952
531.938	2.36503	1.36923	0									525.951	6.79724	0.988689	0.556137	0.988689	1.66841	0.61793	2.78069	-0.308965	1.29765	4.26372	2.28634
532.686	4.3671	0.124774	0.998194									526.699	7.41316	2.90349	1.11197	1.54441	2.3475	0.123553	1.97684	0.926645	2.59461	1.35908	1.35908
533.434	5.37963	0.375323	0.875753									527.448	7.16642	2.65652	3.83033	2.16228	0.803133	2.78008	2.4094	0.247118	1.42093	1.54449	4.07745
534.182	4.45401	2.63477	2.3211									528.196	7.7877	0.309035	-0.123614	2.34867	1.05072	1.05072	-0.370843	-0.370843	1.60699	2.96674	-0.803492
534.931	4.53058	0.503398	2.51699									528.945	6.98911	2.28847	0.494804	3.77288	-0.432954	-0.742206	1.42256	1.17516	2.41217	2.72142	0.804056
535.679	5.23937	0.694374	0.757499									529.693	4.82926	2.22889	0.309568	1.73358	2.22889	0.309568	2.47654	2.78611	1.11444	-0.309568	-0.247654
536.427	5.51097	1.90034	1.58361									530.441	4.09201	0.496001	0.868002	1.674	-0.124	1.302	1.116	-0.496001	2.23201	1.24	1.426
537.175	5.91377	0.635889	-0.445122									531.19	6.7076	1.05583	2.4843	0.621074	0.062107	-0.124215	1.98744	1.05583	1.6769	2.42219	0.24843
537.923	5.10894	1.3411	0.510894									531.938	7.09509	2.73846	1.80489	4.54335	0.995802	1.36923	1.4937	1.74265	-1.18251	2.55174	0.560139
538.67	4.87587	2.50209	3.33613									532.686	2.99458	3.11936	3.24413	1.934	1.55968	1.80923	1.68445	3.05697	0.062387	1.18535	1.37252
539.418	4.12587	0.967	1.86953									533.434	4.50387	1.37618	2.62726	1.68895	1.87661	2.50215	1.00086	2.31449	1.18852	3.87834	1.87661
540.166	6.2835	-0.129557	1.29557									534.182	7.65337	1.38012	3.26209	1.69378	0.752791	1.94471	1.38012	1.38012	1.38012	2.76023	1.38012
540.914	3.83958	3.57927	2.79834									534.931	5.72615	3.96426	1.88774	3.27209	1.25849	1.0068	3.14624	1.88774	2.70576	0.943871	2.64284
541.662	2.74493	3.85597	3.72526									535.679	6.75436	3.78749	2.46187	1.57812	4.29249	0.378749	0.757499	-1.2625	-0.063125	2.33562	3.09312
542.409	3.87121	3.21507	2.29648									536.427	6.27111	4.11739	0.316723	2.8505	2.72381	3.92736	0.570101	0.69679	1.90034	0.950167	0.316722
543.157	5.13608	-0.658471	1.64618									537.175	7.63067	0.699478	1.7169	1.84408	1.01742	3.62457	1.1446	4.45122	2.54356	4.32404	2.79791
543.905	5.74642	-0.924711	0.066051									537.923	3.89557	4.02329	2.87378	0.830203	1.27724	1.40496	2.74606	2.74606	1.21337	1.53268	1.53268
544.652	4.43801	3.31195	2.64956									538.67	5.32497	1.09066	2.56625	1.21897	2.43794	1.28313	-0.577406	1.79638	1.21897	1.0265	0.064156
545.4	5.44649	3.98524	1.39483									539.418	6.3822	2.19187	1.61167	2.5142	-0.1934	4.835	1.03147	2.38527	-0.644666	1.99847	1.09593
546.147	4.595	2.13101	3.12993									540.166	6.86651	3.04459	0.518227	2.52636	1.23079	1.94335	0.842119	2.3968	-0.064778	3.75715	0.129557
546.895	3.60543	1.46888	2.93776									540.914	5.59668	1.88725	2.9285	3.90466	3.5142	1.88725	3.57927	1.36663	1.10632	2.99357	2.73326
547.642	4.15095	2.67803	0.870361									541.662	5.4245	2.54886	2.28744	0.84962	0.914976	3.6599	2.61422	2.22208	0.065355	2.09137	1.96066
548.389	3.6249	0.268511	0.738405									542.409	6.56137	3.01823	2.03403	3.14946	1.96841	2.75577	0.590523	0.262455	1.83718	1.83718	3.3463
549.137	4.9784	-0.403654	1.41279									543.157	5.59701	2.63389	3.75329	0.92186	-0.263389	3.4899	0.856013	0.197541	2.69973	1.18525	3.4899
549.884	3.90837	0.539086	2.42589									543.905	7.06744	2.97229	2.84018	1.58522	1.45312	2.50993	1.65127	1.71732	0.990762	1.45312	-0.066051
550.631	1.82142	-0.3373	1.3492									544.652	5.76279	2.58332	2.64956	0.728629	0.861107	2.18589	2.31837	3.04699	1.45726	2.78204	2.91452
551.378	4.65706	0.472455	-0.269974									545.4	5.71218	1.46125	1.5941	2.78967	1.72694	2.72325	2.52399	1.66052	0.597786	1.79336	2.92251
552.126	2.7671	3.64447	0.674902									546.147	7.65833	3.3963	1.79804	1.39848	1.1987	1.1987	1.1321	0.399565	5.19435	2.19761	3.99565
552.873	4.79019	0.607207	0.404805									546.895	4.60694	2.67069	1.13504	2.80423	2.80423	2.13655	1.60241	0.867975	1.80272	2.73746	2.80423
553.62	4.31588	1.34871	3.16947									547.642	6.29338	0.736459	1.94158	1.07121	1.60682	1.53987	2.27633	5.55692	0.200853	1.94158	1.47292
554.367	4.0434	2.35865	1.75214									548.389	6.24288	1.54394	2.28234	2.48373	0.469894	2.55085	2.14809	2.08096	2.61798	3.155	1.47681
555.114	3.36649	0.807958	1.88523									549.137	6.32391	3.63288	2.82558	0.740032	2.08555	1.34551	0.538205	-0.067276	1.07641	0.941859	2.08555
555.861	4.03557	0.067259	2.89216									549.884	5.25609	4.11053	2.42589	3.70622	1.28033	2.15634	2.76282	2.42589	1.95419	0.673857	2.69543
556.608	3.29166	0.268707	2.82142									550.631	5.32933	2.09126	1.41666	1.14682	0.13492	2.63094	2.63094	0.06746	3.17062	2.49602	-0.3373
557.355	2.61604	1.60987	2.54896									551.378	6.00693	3.44217	3.84714	2.22729	0.809923	3.57716	1.34987	-0.269974	2.96972	3.44217	2.49726
558.102	2.74544	3.01329	1.07139									552.126	6.81651	0.742392	2.69961	3.17204	0.742392	2.15969	0.269961	0.13498	1.48478	4.04941	3.98192
558.848	2.87358	1.73751	1.73751									552.873	5.5998	2.42883	1.28188	1.07948	2.09149	4.38538	2.36136	0.53974	0.944544	2.02402	0.674674
559.595	1.8669	1.46685	1.40017									553.62	4.65306	2.29281	0.134871	3.37178	1.68589	1.82076	1.68589	2.0905	2.96717	1.48358	2.36025
560.342	2.92608	1.59604	3.5911									554.367	3.57167	2.6956	1.95431	1.3478	3.97601	2.0217	0.876069	2.22387	1.75214	1.14563	3.90862
561.089	2.51955	0.397824	2.45325									555.114	3.02984	3.09717	0.13466	-0.673298	0.875287	1.81791	1.48126	1.00995	1.3466	1.75057	1.81791
561.835	1.58605	2.31299	2.90776									555.861	4.50638	4.37186	1.00889	1.68149	0.941632	1.34519	1.54697	0.538076	3.69927	2.08504	1.47971
562.582	4.47767	1.7779	3.22655									556.608	3.35883	1.74659	-0.40306	0.40306	1.07483	2.82142	1.67942	0.940473	1.94812	1.94812	3.02295
563.328	4.45989	-0.524693	3.01699									557.355	3.82344	1.47572	2.07942	2.54896	2.68312	0.402468	2.61604	2.61604	3.3539	2.68312	3.48805
564.075	2.15503	0.783646	0.587734									558.102	5.82569	2.74544	1.80797	1.9419	3.08025	1.60709	1.47316	3.08025	2.41063	1.07139	-0.267848
564.821	4.35516	0.390015	2.47009									558.848	4.07648	3.00724	1.26972	1.73751	-0.133655	0.868757	0.935585	4.41061	1.67069	3.20772	3.00724
565.568	2.9747	1.22868	-0.905342									559.595	6.4008	2.667	0.40005	1.3335	1.13348	1.6002	1.40017	1.46685	0.600075	-0.66675	3.06705
566.314	4.17946	0.578694	1.22169									560.342	4.45562	0.665019	2.85958	1.59604	1.99506	1.33004	0.73152	1.39654	1.66255	3.19209	2.26106
567.06	4.53743	1.59769	1.46987									561.089	3.11629	1.39238	0.596736	2.18803	2.25433	1.59129	2.18803	1.59129	2.78477	1.39238	2.85107
567.807	3.30151	0.444435	2.22217									561.835	3.03993	1.91648	2.84168	2.44516	-0.330428	0.991283	1.45388	3.56862	1.3878	-0.528684	1.32171
568.553	1.89182	0.441423	1.13509									562.582	4.67521	3.81919	1.71205	3.09486	3.4241	2.76562	2.10714	3.2924	1.38281	0.460936	-1.11942
569.299	3.50803	1.31551	2.56838									563.328	4.00079	0.59028	-1.11497	2.16436	0.39352	1.04939	2.36112	2.36112	3.34492	1.04939	1.90201
570.046	3.11244	0.49799	1.68071									564.075	1.6979	1.95911	2.80806	3.78762	0.326519	2.74276	2.02442	2.54685	3.91823	1.37138	3.19989
570.792	2.28943	1.0519	0.618766									564.821	4.87518	1.17004	0.650025	1.95007	0.390015	3.70514	2.01508	2.5351	4.22516	2.27509	1.30005
571.538	3.38406	0.861397	3.19947									565.568	3.7507	2.58669	0.776008	0.517338	0.905342	2.78069	5.17338	2.32802	5.10872	0.129335	1.87535
572.284	2.50926	1.04043	1.46884									566.314	3.60076	2.44338	2.05758	2.70057	0.064299	4.50096	2.50767	3.72936	5.40114	1.02879	0.578694
573.03	3.41006	1.64414	1.70503									567.06	3.96226	3.13147	2.81193	1.27815	0.447353	4.2818	2.04504	3.19537	4.60134	4.02617	1.78941
573.776	3.03011	1.21205	1.03024									567.807	3.74595	2.34915	0.761888	0.888869	2.22217	3.42849	4.25387	3.61897	6.47605	1.58727	1.90472
574.522	2.41309	0.180982	1.20655									568.553	3.97281	0.882847	1.07203	2.77466	0.378363	5.29708	4.16199	4.09893	4.41423	2.7116	2.01794
575.268	2.88389	0.120162	1.08146									569.299	5.07412	1.25287	-0.751721	0.313217	1.94195	5.01148	5.13676	4.51033	5.44998	0.501148	1.31551
576.014	2.215	0.598649	1.55649									570.046	5.47789	2.67669	2.1787	1.92971	3.05019	4.66865	4.66865	5.04214	6.72286	1.05823	4.29516
576.759	2.62559	-1.9692	0.417708									570.792	2.78444	3.71259	1.0519	1.98005	1.54691	5.38326	5.25951	6.12578	9.21961	2.59882	1.67067
577.505	3.51098	0.714097	0.59508									571.538	2.27655	1.78432	0.615283	1.29209	2.21502	3.87629	5.29144	5.78367	8.73703	2.58419	0.676812
578.251	1.60313	0.356252	-0.059375									572.284	4.40651	1.16283	1.04043	0.244806	1.89725	3.9169	7.8338	7.58899	9.79225	3.7945	2.81527
578.997	1.65955	-0.177809	1.54101									573.03	5.17599	1.64414	-0.730728	-0.365364	-0.060894	5.96761	8.40337	7.73354	9.37768	2.49665	4.019
579.742	2.78198	2.78198	0.295955									573.776	4.12096	0.909035	1.15144	1.09084	0.606023	6.60565	6.36324	8.54492	10.363	2.5453	3.15132
580.488	2.24752	0.059145	1.59692									574.522	4.4039	1.9908	1.14622	3.13702	0.422291	6.75666	8.3855	7.35994	10.497	0.603273	1.56851
581.233	1.77391	-0.118261	1.59652									575.268	2.16292	1.74235	0.120162	2.94397	0.480648	7.45005	9.61297	8.89199	10.6944	2.10284	2.64357
581.979	4.9676	-0.768795	-1.18276									576.014	3.65176	1.55649	0.059865	0.838109	0.897973	6.88446	9.15933	9.33892	11.075	0.778244	1.13743
582.724	2.72191	0.828407	1.53847									576.759	3.6997	0.656399	3.87872	0.179018	-0.179018	7.10104	10.1443	11.1588	11.6362	0.954762	1.61116
583.47	3.43541	0.770006	0.592312									577.505	3.86802	1.42819	3.33245	2.14229	0.416556	9.22375	9.22375	8.92621	14.877	2.26131	1.4877
584.215	2.78782	2.19467	2.07604									578.251	3.85939	1.60313	0.534378	3.02814	0.653128	10.0344	11.5782	13.0032	13.0032	1.90001	1.66251
584.961	2.55531	1.18851	-1.36679									578.997	3.02275	1.89663	1.24466	3.08202	1.00758	10.6685	11.2612	12.5652	14.7581	1.18539	0.592696
585.706	3.33584	2.02533	-0.119137									579.742	3.90661	1.3022	1.89411	1.95331	2.30845	10.832	9.05624	12.4301	14.0875	2.60441	0
586.451	2.32957	0.716791	1.97117									580.488	2.89812	1.77436	4.02188	1.53778	2.12923	10.4096	12.1839	11.9474	13.7809	2.72069	1.18291
587.196	4.85291	0.059912	0.778863									581.233	5.79477	1.30087	0.768695	0.827825	1.65565	12.1217	13.5409	12.0035	16.793	3.54782	2.42434
587.942	3.00524	0.360629	3.00524									581.979	2.89776	2.30638	2.89776	0.709657	1.06448	12.833	12.2416	13.8383	16.0264	1.2419	2.01069
588.687	3.43729	1.20607	0.603034									582.724	2.54439	-0.591719	3.01777	3.25445	3.07694	12.8403	14.3196	11.6569	15.9764	2.72191	1.30178
589.432	1.14956	1.08906	2.11761									583.47	2.66541	2.42848	2.66541	0.355388	1.71771	13.6232	11.4909	14.867	16.7032	1.42155	1.24386
590.177	1.27487	1.5177	1.39628									584.215	3.0844	1.95741	1.5422	2.3133	1.66083	13.168	11.4479	12.3376	18.1505	0.177946	2.07604
590.922	2.43685	0.121843	0.48737									584.961	3.74382	3.56555	0.713109	1.78277	2.37703	11.2315	12.5388	12.4794	14.3216	3.09014	1.54507
591.667	3.24024	0.18341	-0.244546									585.706	3.038	2.14447	1.78706	1.9062	1.78706	14.4156	12.4498	11.9137	13.2838	2.26361	3.038
592.412	2.51557	1.59524	1.47253									586.451	3.52422	2.7477	0.955721	1.07519	-0.179198	13.2606	12.9022	13.4398	14.4553	2.44903	1.49331
593.157	4.67948	0.369432	-1.78559									587.196	3.05554	2.99562	0.23965	0.599125	1.4379	14.9182	11.3235	12.7014	15.8768	3.59475	2.33659
593.902	1.35942	1.17405	1.5448									587.942	2.16378	-0.060105	-0.420734	-0.480839	1.2021	14.305	11.4199	11.1795	14.7858	2.94514	1.74304
594.647	2.41824	0.558056	0.49605									588.687	4.34184	0.783944	1.99001	0.36182	1.08546	12.6034	11.0958	10.9149	12.4225	1.20607	2.83426
595.391	1.8666	2.73768	-0.06222									589.432	1.57308	1.63359	2.54113	1.33107	-0.484026	11.0721	11.3141	9.92253	12.8872	3.20667	0
596.136	2.30983	1.99769	0.31214									590.177	1.15345	1.03204	1.09274	0.060708	2.06407	11.7773	9.77398	8.74194	13.1736	3.94602	0.971327
596.881	3.13176	-0.187906	2.69331									590.922	2.13225	-0.48737	0.791977	3.10699	0.365528	10.5394	9.93017	10.7831	11.575	1.03566	0.426449
597.625	2.01053	1.00527	0.816778									591.667	1.71182	3.11796	1.22273	2.13978	2.13978	10.8823	9.84299	11.2491	12.533	4.03501	0.550229
598.37	4.78865	2.14229	-0.126017									592.412	3.06776	3.06776	0.429487	1.65659	1.59524	10.0623	10.4917	10.8599	11.1667	1.28846	2.20879
599.115	1.45287	1.51604	2.02138									593.157	-0.061572	1.90873	3.0786	2.52445	0.800437	10.9598	8.86637	11.083	11.5755	1.35458	1.1083
599.859	2.78568	1.07629	0.63311									593.902	1.85376	3.39855	0.556127	0.679711	2.10093	10.5046	7.78578	9.9485	10.5046	2.59526	2.03913
600.604	1.45893	2.98129	1.26863									594.647	2.9763	-0.49605	1.86019	2.54226	2.17022	9.36294	6.63467	8.80489	11.9672	1.67417	2.41824
601.348	-0.063536	-0.444749	2.03314									595.391	1.67994	2.1777	-0.311101	1.61772	0.24888	9.08413	7.96417	7.77751	10.2663	1.30662	1.99104
602.092	2.79968	0.890806	2.79968									596.136	1.93527	3.1214	4.12024	0.187284	0.624279	10.4879	9.36419	7.67863	9.92604	-0.811563	1.37341
602.837	0.063712	0.127424	1.46537									596.881	3.75811	1.0648	0.250541	3.50757	3.00649	10.7733	8.58102	9.45791	9.70846	1.56588	1.56588
603.581	1.78597	1.08434	2.42382									597.625	3.95823	2.3875	0.62829	-0.376974	-0.816778	8.41909	8.79607	8.60758	9.48719	3.32994	1.82204
604.325	2.61763	0.063845	0.574602									598.37	3.08742	-0.567077	0.252034	1.51221	-1.32318	8.56916	9.5773	8.50615	8.00209	1.63822	2.39432
605.07	3.13077	-0.127787	1.40565									599.115	3.09524	0.063168	2.84257	2.33722	1.32653	7.01166	9.66473	11.0544	10.6754	1.89504	0.947522
605.814	2.62108	1.79001	1.27858									599.859	3.16555	1.39284	1.26622	2.08926	1.01297	11.0161	8.16711	10.0031	8.16711	1.7094	1.64609
606.558	1.98267	2.6862	0.063957									600.604	3.29844	1.52236	0.38059	1.90295	0.063432	12.052	11.6714	9.38788	10.4662	2.72756	2.47383
607.302	2.04722	1.40747	3.83854									601.348	1.52485	2.35082	2.8591	3.11324	2.28728	8.83145	10.1657	10.6104	12.3894	0.254142	1.14364
608.046	1.66386	2.49579	-0.383968									602.092	4.45403	0.445403	1.46347	0.572661	1.59072	9.41709	9.22621	10.4988	12.2168	2.99056	1.9725
608.79	1.9203	2.11233	1.60025									602.837	3.37673	-0.318559	-0.637119	4.2687	3.56787	9.42936	8.5374	8.79224	9.04709	1.52909	1.21053
609.534	3.84143	0.448166	1.53657									603.581	1.72219	2.4876	0.446493	3.06166	2.16868	10.0142	7.39902	8.80228	13.3948	1.14812	2.61517
610.278	1.66491	0.576313	0.832452									604.325	2.74532	0.82998	0.510757	0.255379	1.46843	10.6621	7.7252	11.5559	11.939	1.91534	1.65996
611.022	4.99563	1.53712	3.39446									605.07	2.49184	2.49184	2.49184	3.06688	1.46955	10.0313	9.39232	10.8619	12.1397	-0.702827	1.85291
611.766	3.97139	2.75435	2.24191									605.814	3.70788	1.53429	0.831076	1.91787	1.34251	11.0597	10.3565	10.6761	14.5119	1.15072	2.17358
612.51	3.07525	1.21729	1.08915									606.558	1.53497	1.72684	1.72684	1.3431	0.895401	11.4483	9.52962	12.4077	14.1345	2.36642	1.53497
613.253	1.66608	0.961199	1.66608									607.302	2.87891	2.23915	0.831685	1.59939	-0.44783	12.9871	10.2361	12.6672	14.9703	1.08759	1.91927
613.997	1.34598	0.320472	2.75606									608.046	1.72786	0.319973	1.2159	1.40788	0.767936	10.8791	10.4951	13.8228	15.5507	2.68777	1.85584
614.741	2.4363	0.833471	1.79517									608.79	3.2005	2.49639	2.11233	0.896139	-0.6401	11.9059	12.4179	12.2899	16.8986	2.94446	0.06401
615.484	2.43716	1.7958	1.53926									609.534	2.81704	0.256095	2.30485	-0.128048	1.02438	11.9084	13.8932	14.7255	15.3017	1.47255	1.53657
616.228	2.37389	-1.7323	2.56637									610.278	4.86665	1.98508	1.40877	0.448244	1.92104	12.7429	13.7034	16.4569	18.1859	1.98508	3.58595
616.972	1.79738	1.92576	1.98995									611.022	4.29111	4.03493	2.11353	-0.192139	3.33042	17.4847	15.8195	19.5342	18.8297	1.85735	1.98544
617.715	2.18388	1.54156	0.70655									611.766	6.27735	3.13868	2.75435	3.01057	3.33084	14.9888	16.5261	20.0491	23.2518	2.24191	-0.064055
618.458	0.514213	1.0927	1.02843									612.51	3.20338	4.48474	3.01118	3.13932	1.85796	18.7718	15.7607	18.5156	22.8081	3.52372	1.28135
619.202	2.31592	1.35095	-0.257324									613.253	3.5244	1.40976	0.961199	1.02528	1.2816	17.4938	17.3657	20.7619	25.1834	3.33216	2.43504
619.945	-0.128784	-0.064392	1.86737									613.997	1.41008	1.79465	2.88425	1.28189	1.92283	17.1773	20.2538	23.2663	23.9713	1.92283	2.49968
620.689	0.386739	2.77163	3.35174									614.741	4.03913	3.78268	-0.192339	2.56453	1.79517	21.0291	21.9267	26.9916	29.1715	0.384679	2.05162
621.432	1.67756	0.387129	1.41947									615.484	2.82198	2.82198	1.02617	2.95025	1.02617	21.1007	20.3311	25.8467	30.7211	2.24476	0.76963
622.175	1.09804	-1.3564	1.80853									616.228	1.92478	2.69469	3.4646	0.769912	3.59292	23.2898	19.9535	26.177	30.6681	3.14381	1.98894
622.918	1.61645	-0.387947	1.87508									616.972	1.28384	2.76026	2.31092	1.86157	1.09127	25.9336	25.2917	29.5284	31.9035	1.41223	1.02707
623.662	2.07139	1.16516	1.35935									617.715	1.4131	0.513855	1.79849	2.18388	0.835014	24.4723	27.7482	34.1713	36.4837	1.54156	-0.449623
624.405	1.36094	-0.19442	-0.38884									618.458	1.41409	2.05685	2.50679	2.69962	2.31396	27.9603	24.8108	36.1878	41.0728	2.57107	0.835596
625.148	1.752	0.778668	1.29778									619.202	3.02356	2.76623	3.53821	1.0293	3.66687	30.8789	32.1012	35.768	43.6164	3.34521	1.8656
625.891	0.844672	2.72894	2.46904									619.945	3.28399	4.31426	3.15521	0	0.32196	34.3209	33.0975	39.4079	47.3925	1.03027	1.86737
626.634	0.845842	1.3013	2.01701									620.689	2.38489	3.15837	3.28728	2.51381	1.80478	35.8378	35.9668	43.1859	49.2448	2.77163	2.90055
627.377	1.88946	2.86677	-0.847001									621.432	3.93581	1.16139	2.7099	1.16139	2.7099	38.6483	39.2936	48.133	56.5208	2.45181	2.00016
628.12	3.00162	1.95758	1.30505									622.175	4.39214	3.55247	3.10033	2.84197	1.61476	40.1752	40.6273	50.6388	59.1647	1.80853	3.16493
628.862	0.196075	1.17645	0.326791									622.918	1.81042	3.87947	0.452605	1.81042	0.193974	42.4156	44.7433	54.9592	64.6579	1.42247	-0.32329
629.605	3.60059	-1.11291	0.327327									623.662	2.84817	2.52451	2.39505	2.20086	0.064731	48.3541	47.3184	59.4231	68.5502	4.40171	1.0357
630.348	2.09849	2.03292	2.49196									624.405	2.13862	4.08282	2.72188	3.17553	0.77768	49.7067	50.938	63.7049	74.398	3.8884	1.87939
631.091	0.78835	2.62783	2.16796									625.148	1.68711	1.88178	3.37423	3.17956	1.88178	56.1939	53.793	66.7708	79.2944	1.49245	1.94667
631.833	0.131618	-0.065809	1.05294									625.891	1.75432	2.53402	1.49442	1.42945	3.05382	59.9068	63.2855	74.9159	85.3769	1.42945	1.5594
632.576	1.7139	1.77982	1.51614									626.634	1.1061	1.23623	3.5135	2.2122	2.73272	63.3731	61.8115	75.4751	91.481	1.17117	1.23623
633.319	3.30157	1.84888	2.113									627.377	1.95462	3.12739	4.36531	1.62885	0.716693	69.6495	68.8025	81.2469	99.7506	1.23792	2.15008
634.061	1.38905	2.51352	2.11665									628.12	2.80587	2.80587	3.45839	1.30505	1.89233	72.6915	72.6263	89.1352	105.905	1.89233	2.67536
634.804	0.132523	-0.79514	0.993925									628.862	0	3.33327	4.18293	0.915016	3.1372	80.8482	74.8353	95.0963	111.959	3.1372	2.74505
635.546	1.92502	4.58023	1.85864									629.605	2.02943	3.79699	5.49909	1.04745	2.35675	82.8791	80.1951	99.1145	118.558	1.37477	0.654653
636.289	2.39405	-0.199505	2.32755									630.348	4.00026	5.90202	4.39372	1.96734	0.852513	87.0219	86.7596	106.958	124.533	2.88543	4.32815
637.031	2.33203	0.399776	1.86562									631.091	2.82492	4.53301	6.10971	3.35049	1.70809	91.3172	92.4998	111.617	133.56	2.23366	1.44531
637.773	3.07072	2.20291	0.734303									631.833	3.35626	5.65957	6.12024	3.75111	3.35626	97.9896	97.9896	119.246	142.674	2.10589	2.76398
638.516	1.60504	0.80252	2.27381									632.576	2.50493	5.40537	5.07577	3.36187	3.29596	102.241	100.329	127.949	146.67	1.77982	2.37309
639.258	1.40703	5.22612	-0.201005									633.319	0.528251	4.22601	6.66917	1.91491	2.70729	103.867	107.103	127.771	153.721	1.91491	1.32063
640	0.73837	3.22198	1.07399									634.061	2.24894	4.56403	7.60671	3.30727	1.78592	111.653	113.439	136.193	161.328	1.85207	2.0505
640.742	0.067242	1.61382	2.42073									634.804	3.44561	6.42739	5.83103	0.596355	0.728879	116.024	116.753	140.674	164.859	2.2529	2.2529
641.484	1.81881	0.336817	3.03136									635.546	0.796562	6.30611	8.09838	3.58453	2.52245	119.683	122.007	147.43	173.053	1.59312	3.58453
642.226	2.56455	2.15962	1.68721									636.289	3.99009	5.71913	7.64767	3.72408	4.98761	124.358	127.084	151.091	177.825	2.66006	3.92359
642.969	0.811318	1.55503	2.36634									637.031	1.06607	4.66406	5.79676	3.3981	2.99832	130.127	126.329	159.044	185.096	1.86562	3.66462
643.71	2.30295	1.89655	3.45443									637.773	2.73695	7.34303	8.4111	3.27099	4.40582	133.71	131.64	155.939	190.919	3.67151	0
644.452	2.23942	2.23942	3.39305									638.516	-0.267507	4.48074	9.96463	3.00945	2.80882	135.425	136.228	164.717	194.477	1.73879	2.20693
645.194	0.815816	1.90357	2.51543									639.258	1.74204	7.57118	8.64321	3.95309	3.75209	142.043	137.286	161.943	197.923	3.75209	3.35008
645.936	1.97512	0.885399	1.90701									640	0	5.70559	9.53169	1.81236	4.3631	143.378	140.29	173.92	204.126	4.22885	4.0946
646.678	-1.02351	2.31994	3.13875									640.742	1.27761	7.59839	10.6243	4.43799	2.42073	144.033	140.537	174.561	202.265	1.34485	2.15176
647.42	0.957027	1.91405	5.12693									641.484	2.69454	6.66898	9.56561	3.77235	2.42508	146.111	147.661	178.715	204.785	1.88618	2.62717
648.162	0.547828	3.42392	2.12283									642.226	1.61972	9.24589	10.9331	4.25176	1.95716	148.272	149.419	180.599	208.539	5.06162	3.98181
648.903	2.40106	2.26386	4.66492									642.969	2.23113	8.51884	11.7641	5.81445	3.71854	149.485	151.919	185.927	211.619	2.772	3.78615
649.645	-1.0996	4.32966	0.962146									643.71	2.43842	6.97659	11.5825	4.1995	5.28324	149.218	154.569	185.455	213.904	2.84482	4.87684
650.386	0.61959	3.30448	3.78638									644.452	0.814333	8.00761	13.2329	4.07167	6.37894	152.009	154.248	190.69	220.413	2.64658	5.2253
651.128	2.96527	3.58591	3.03423									645.194	1.22372	11.0135	10.8776	5.09885	3.67117	156.501	161.26	195.456	226.321	5.57475	3.26327
651.869	2.14145	3.31579	4.14474									645.936	0.749184	8.78588	12.3275	6.94698	3.95024	157.942	162.981	196.695	224.21	5.17618	4.83564
652.611	2.56017	3.3213	3.18291									646.678	2.86581	10.235	16.1714	5.86809	5.11752	164.784	165.33	198.082	230.016	3.13875	4.98106
653.352	1.45542	1.73265	3.74252									647.42	1.57226	10.4589	13.1933	7.1777	5.26365	163.241	165.702	201.933	235.36	6.0156	4.44334
654.094	0.694188	2.63791	4.23455									648.162	4.51958	9.45003	14.449	6.71089	6.09458	164.006	172.36	212.078	242.962	4.99893	6.30002
654.835	2.22507	3.61573	3.82433									648.903	1.30343	13.1715	14.5436	5.89975	8.84963	168.143	174.592	213.557	247.035	5.76255	3.9103
655.576	1.46261	5.29326	6.33798									649.645	1.37449	12.4392	14.3635	7.90334	6.80375	173.599	183.564	224.043	253.663	6.04777	6.80375
656.318	-0.697641	3.90679	6.55782									650.386	0.20653	12.2541	15.7651	7.84814	5.64515	172.866	185.67	228.491	263.326	7.50392	6.95317
657.059	2.37593	3.35426	5.73019									651.128	0.551678	13.8609	17.3089	8.48206	8.34414	181.64	189.157	237.498	270.529	5.58574	8.13726
657.8	1.11992	2.44983	4.05971									651.869	2.00329	14.7829	15.5428	9.04935	8.42764	182.507	196.53	241.569	278.043	5.45724	5.18093
658.541	-0.350529	4.97751	5.18783									652.611	2.83694	14.9459	20.0662	8.64922	8.02647	188.069	202.668	252.488	285.632	6.50421	6.71179
659.282	2.17662	6.03837	6.1788									653.352	0.277223	16.6334	20.5145	7.69295	6.93058	195.442	207.848	259.342	298.847	5.75239	5.61377
660.023	0.914148	5.20361	4.00819									654.094	1.04128	14.7168	18.2571	8.39968	8.81619	202.009	218.877	272.746	307.803	7.0113	6.6642
660.764	1.19718	3.02815	6.83095									654.835	1.8774	15.5059	21.6944	10.9863	9.03933	208.809	224.732	276.464	314.777	5.49313	6.95333
661.505	0.705284	6.62967	7.1939									655.576	0.905425	16.8548	23.6107	10.7955	9.75073	214.029	236.734	295.378	335.356	8.63636	8.70601
662.246	1.69529	6.56926	4.52078									656.318	2.86033	18.627	22.9524	13.1854	10.046	219.757	237.965	306.892	346.797	6.90664	7.32522
662.987	1.98093	5.73053	7.78221									657.059	3.63378	20.0557	25.1569	12.6484	12.2291	230.535	254.435	313.414	357.858	6.0796	7.54708
663.728	1.62971	4.81827	5.88112									657.8	3.91972	20.2986	22.7484	13.789	9.9393	243.723	262.411	334.716	374.823	5.24963	8.60939
664.468	0.567743	6.67098	8.37421									658.541	2.03307	22.1534	29.7248	13.5304	13.6005	251.539	274.534	348.706	397.079	8.90343	8.5529
665.209	2.70099	6.6814	6.11277									659.282	3.44047	21.2747	30.2621	13.9023	14.1831	264.775	290.193	362.232	411.381	7.79371	9.90012
665.95	0.213576	5.55298	8.32947									660.023	2.10957	25.3149	31.5029	13.9935	15.8218	275.791	300.192	380.637	431.407	10.2666	11.462
666.69	2.13926	7.05955	7.84394									660.764	2.39435	25.6337	33.7322	15.0703	15.2816	286.336	311.266	395.491	449.223	9.08446	10.4225
667.431	2.71448	5.92901	8.07202									661.505	2.53902	29.763	32.302	18.0553	16.0099	292.411	331.06	414.778	469.084	8.95711	11.5667
668.171	2.43317	7.87203	7.87203									662.246	2.33103	29.0319	38.2854	18.6482	17.1649	306.212	337.646	429.898	491.353	9.88922	11.3726
668.912	1.93576	9.46371	9.17693									662.987	3.67886	33.3927	40.4675	16.9794	18.3236	319.283	356.354	451.368	511.22	10.6121	11.4611
669.652	3.23215	8.04447	9.05003									663.728	-0.354284	34.9325	42.5141	20.5485	18.4228	329.272	366.472	471.907	534.757	10.6285	12.0457
670.393	1.43914	10.7216	10.146									664.468	1.41936	38.8904	44.7807	23.0646	21.9291	344.975	383.085	485.917	549.433	11.4968	12.2065
671.133	1.1534	10.3085	9.73185									665.209	2.77207	41.1546	47.4095	22.7452	19.6177	358.947	403.514	507.218	582.419	9.80886	12.2255
671.873	2.23892	11.3391	10.4002									665.95	0.142384	42.5728	50.3328	25.2732	23.0662	375.04	415.263	518.848	598.013	12.8858	16.5877
672.614	1.88146	11.2164	9.47969									666.69	2.28187	40.7172	53.624	26.4555	25.1006	387.633	432.772	541.66	619.243	12.5503	14.2617
673.354	1.74022	9.35371	14.1393									667.431	2.50018	48.3607	59.1472	30.6451	27.2877	399.315	442.675	563.041	644.404	15.7154	15.2154
674.094	1.96199	9.73726	13.2979									668.171	2.07535	49.6653	63.3341	28.6256	27.0512	412.351	460.013	586.681	666.618	13.454	15.9588
674.834	0.582667	8.5215	11.5805									668.912	2.86779	52.4089	66.8912	29.4665	31.9042	425.365	472.899	597.719	683.323	14.4823	14.4823
675.574	4.16106	12.8482	13.3592									669.652	1.72382	55.7367	73.4776	33.1835	29.664	436.269	490.282	617.413	702.096	17.2382	19.2493
676.314	2.92704	14.2693	14.3425									670.393	-0.79153	58.7171	76.2747	35.9786	34.1797	445.415	505.428	633.512	729.575	14.1756	18.4211
677.054	0.220074	11.4439	16.4322									671.133	5.19032	65.5999	84.0543	37.5577	34.4579	459.559	511.03	652.682	738.395	18.1661	20.545
677.794	1.61779	15.4425	16.9133									671.873	3.1056	62.112	80.6012	40.5895	39.3617	469.09	528.963	667.921	753.217	16.3947	22.2448
678.534	3.39048	14.3727	15.4046									672.614	4.48657	67.7328	90.238	41.1028	37.8464	474.781	536.29	677.255	772.269	20.0448	22.7947
679.274	-0.147763	16.1062	18.9137									673.354	1.5227	74.5396	92.0869	45.8259	42.9255	483.347	549.911	694.277	793.47	19.8676	22.9855
680.014	1.85148	16.219	17.4039									674.094	3.05198	72.6661	96.3552	48.977	46.2883	497.545	559.747	710.02	801.943	22.7445	26.0871
680.753	2.89529	16.4066	16.7036									674.834	2.25783	78.223	103.496	48.944	46.759	512.018	570.504	723.089	827.387	23.7437	26.22
681.493	3.87019	18.9044	17.6391									675.574	2.19003	85.1923	106.217	55.4808	51.6848	516.045	576.855	729.865	828.708	23.2143	26.7184
682.233	2.98564	19.0335	18.9588									676.314	2.85386	86.2744	114.154	53.4184	53.7843	528.623	583.139	742.882	839.62	26.0506	29.1972
682.973	1.64739	21.0417	18.2711									677.054	1.61388	90.8907	120.527	58.3197	53.9916	529.866	596.035	757.056	859.317	27.0692	30.0768
683.712	1.42792	19.6902	19.0138									677.794	2.27961	95.9643	123.687	62.1378	63.0203	530.12	600.715	756.464	872.503	26.62	29.7085
684.452	1.13203	21.5087	21.886									678.534	2.80083	100.24	131.492	65.6722	64.2718	544.688	606.749	777.379	871.059	30.2195	32.2833
685.191	0.758339	20.3235	21.3851									679.274	3.32468	101.44	134.539	70.4093	69.3749	546.577	615.508	782.777	884.068	29.4788	34.6505
685.931	2.05846	22.1856	22.7956									680.014	3.85108	105.386	139.305	73.0964	71.9114	543.816	614.765	786.064	890.043	28.4387	37.7702
686.67	3.60381	24.1532	24.3832									680.753	2.67258	110.986	145.284	79.2122	76.0199	554.188	616.994	800.065	893.382	32.739	35.7086
687.409	3.62573	25.5344	25.9201									681.493	2.82822	112.98	153.394	80.3065	83.4324	554.926	629.874	804.032	910.314	31.6314	41.7534
688.149	1.3971	26.933	28.4077									682.233	2.5378	118.754	154.656	84.1951	84.2697	557.718	638.181	813.14	909.203	36.7234	41.3511
688.888	0.70272	26.9376	31.5443									682.973	2.8455	118.537	159.498	92.7782	92.329	560.264	636.568	814.412	925.162	39.9867	43.4313
689.627	-0.549604	27.0876	30.5423									683.712	4.13344	127.235	166.465	94.1673	95.2194	567.559	648.424	822.705	939.644	40.3574	47.8727
690.366	2.36768	31.3324	30.4642									684.452	4.15079	134.637	169.805	101.732	99.4681	571.225	655.524	836.046	940.797	42.5645	47.7719
691.105	2.06151	29.1782	32.5084									685.191	2.19918	135.894	177.982	109.277	105.409	575.806	660.285	846.912	954.9	41.9361	48.4578
691.845	4.06051	32.7229	36.4649									685.931	0.228718	141.653	183.051	111.843	115.121	583.688	664.197	855.939	965.342	44.5238	55.8834
692.584	-0.559429	34.5248	34.4449									686.67	2.07028	142.159	190.465	121.686	118.849	584.124	675.216	874.269	989.591	50.8368	57.2009
693.323	0.320805	35.7698	37.6144									687.409	1.23429	149.041	197.332	125.049	128.675	594.543	682.563	883.058	986.276	55.3888	60.1717
694.062	2.81633	39.67	38.7044									688.149	-0.310467	161.132	199.32	137.459	133.268	596.951	696.223	900.044	1007.08	57.9021	61.7054
694.8	1.13012	39.9578	39.4735									688.888	0.62464	162.875	208.239	143.043	140.076	604.573	708.42	918.221	1033.94	58.7942	68.9446
695.539	2.02438	39.8397	40.4066									689.627	2.19842	164.646	218.978	153.261	153.889	615.321	712.13	935.034	1050.92	64.8533	70.3494
696.278	1.46213	43.2142	46.2197									690.366	2.05199	173.63	224.93	160.766	159.582	622.701	724.432	945.022	1057.72	67.2422	77.1076
697.017	0.244459	44.899	49.7067									691.105	2.7751	185.218	238.025	171.739	169.678	628.442	727.474	962.723	1079.04	66.3646	78.3372
697.756	1.63477	45.7734	48.5525									691.845	1.11465	191.003	241.162	179.777	179.777	631.846	731.369	973.168	1092.59	74.9203	82.0859
698.494	1.63975	47.8806	52.4718									692.584	1.43853	194.681	252.223	192.364	187.409	645.102	751.873	981.958	1112.78	80.2381	91.6665
699.233	3.12514	50.249	52.7985									693.323	4.89228	197.616	259.612	200.022	197.376	650.834	759.988	996.261	1125.79	85.1738	93.6752
699.971	5.03121	54.1886	55.7557									694.062	1.85073	210.098	271.253	208.006	210.822	657.493	768.134	1017.5	1146.57	91.2491	95.5943
700.71	-0.330807	55.8236	58.8836									694.8	2.74458	220.374	280.189	219.566	214.965	661.605	777.442	1021.55	1156.19	93.7193	104.052
701.448	0.663331	62.1044	63.5969									695.539	2.10535	227.702	294.263	230.779	228.997	670.797	788.616	1042.31	1176.32	99.5183	109.235
702.187	1.91195	63.1775	63.3437									696.278	3.98025	235.404	310.703	241.577	245.963	674.044	797.188	1055.82	1173.77	106.248	118.92
702.925	2.16627	63.9049	66.9876									697.017	3.50392	243.563	316.086	260.838	262.631	673.73	801.093	1067.39	1206.57	111.636	125.163
703.664	0.834968	63.8751	71.0558									697.756	5.80342	253.47	333.737	270.227	269.328	685.621	817.955	1085.65	1218.39	115.987	128.493
704.402	4.51805	68.6074	76.0538									698.494	1.47577	259.408	339.755	284.25	283.922	693.284	816.183	1089.04	1236.2	121.833	135.197
705.14	4.27587	72.606	77.8041									699.233	3.20738	271.641	350.838	297.3	302.399	695.92	820.186	1108.6	1236.73	131.832	148.362
705.878	1.51215	78.3796	78.3796									699.971	3.38163	288.593	370.907	312.76	315.647	696.451	829.077	1114.78	1254.75	136.832	154.565
706.617	3.45142	83.255	82.6657									700.71	2.81186	303.184	383.901	331.386	328.574	713.881	834.626	1126.31	1276.75	143.157	165.403
707.355	3.6276	81.3258	85.6283									701.448	1.82416	310.522	400.155	343.274	350.322	714.905	840.689	1145.9	1276.33	150.41	170.062
708.093	0.845613	83.8002	91.0725									702.187	3.40826	322.205	413.646	361.359	367.094	715.235	849.072	1154.07	1292.39	161.934	178.393
708.831	3.30567	91.2873	92.5587									702.925	1.4164	333.938	429.337	374.431	387.678	720.534	845.594	1166.78	1300.68	168.719	189.298
709.569	3.31372	90.4901	99.4966									703.664	4.00785	352.941	445.539	399.783	401.703	720.076	869.202	1164.86	1310.9	176.596	203.565
710.307	2.21473	98.0443	101.792									704.402	2.34269	361.026	463.268	414.071	420.346	718.956	862.948	1173.27	1316.68	191.264	215.193
711.045	3.67237	102.912	105.388									705.14	4.02435	375.187	480.994	428.425	440.331	727.15	874.038	1187.18	1331.72	197.109	226.957
711.782	3.16818	104.892	115.424									705.878	4.78847	388.706	500.773	448.604	460.953	724.57	870.408	1180.73	1324.47	207.836	237.491
712.52	2.9189	108.858	115.211									706.617	2.44125	402.89	524.279	481.515	482.188	723.535	874.219	1203.03	1343.53	222.574	247.66
713.258	5.42242	115.936	119.81									707.355	1.77162	417.934	531.064	498.163	504.406	728.389	885.642	1195.51	1345.17	239	264.309
713.996	3.02023	119.86	123.398									708.093	5.41192	437.351	561.318	517.177	530.876	725.62	883.073	1204.07	1357.29	243.959	276.346
714.733	4.58558	125.541	130.559									708.831	5.50945	453.046	575.017	547.046	557.471	738.351	877.698	1218.52	1358.21	259.283	293.95
715.471	3.90419	131.701	136.126									709.569	5.26797	466.3	604.712	562.143	579.051	730.293	889.437	1221.57	1379.7	268.666	305.712
716.209	4.08979	137.225	138.096									710.307	6.04791	488.348	621.998	588.692	610.243	729.412	896.624	1225.51	1375.26	284.337	321.732
716.946	6.19879	139.429	146.326									711.045	1.45187	502.773	641.896	617.812	629	724.396	889.824	1225.46	1386.45	297.206	334.1
717.684	4.55686	145.118	149.412									711.782	2.99693	522.921	660.18	643.312	652.902	727.054	892.228	1228.91	1384.92	314.249	347.729
718.421	4.13519	151.154	158.193									712.52	4.63589	534.416	690.147	672.892	694.268	726.548	895.586	1241.56	1397.12	318.847	368.983
719.158	7.95101	155.663	162.554									713.258	4.47565	561.35	712.058	699.062	723.592	737.105	904.511	1246.73	1404.49	342.99	392.91
719.896	3.37233	160.541	170.214									713.996	6.47192	570.391	733.139	727.098	746.514	741.25	894.764	1254.08	1408.2	353.367	404.969
720.633	6.59985	162.41	179.177									714.733	3.11474	595.347	759.65	758.352	780.934	735.424	902.062	1250.39	1407.69	374.547	412.356
721.37	8.595	176.466	182.017									715.471	5.98643	611.136	785.35	792.811	814.067	735.289	906.119	1251.42	1412.71	389.204	439.178
722.107	6.28754	180.542	187.369									716.209	3.48067	634.439	814.564	821.7	847.892	735.64	905.323	1256.35	1428.12	408.631	459.449
722.845	6.11876	191.211	201.919									716.946	3.7542	664.056	841.027	852.202	875.426	725.258	901.269	1255.56	1420.13	426.93	478.965
723.582	5.96523	193.87	208.241									717.684	3.15475	677.657	873.427	883.33	913.563	729.536	902.696	1269.61	1415.26	441.402	494.419
724.319	5.25564	204.336	212.853									718.421	3.87124	702.015	889.154	922.94	935.961	726.298	905.607	1273.81	1429.1	462.614	518.307
725.056	3.71527	215.758	221.195									719.158	6.71419	737.589	930.003	950.234	981.508	721.51	907.21	1263.77	1425.35	484.747	542.877
725.793	6.25302	215.593	229.187									719.896	4.52602	747.681	960.138	983.655	1017.2	723.542	895.886	1262.76	1422.95	499.105	562.824
726.53	8.33249	222.351	235.031									720.633	5.79717	776.018	991.94	1023.69	1059.19	710.465	898.293	1268.33	1437.25	523.529	584.8
727.266	7.34894	235.438	244.783									721.37	3.58125	806.766	1033.19	1054.86	1088.25	711.952	896.655	1275.28	1434.02	536.829	609.707
728.003	7.43707	242.068	258.302									722.107	4.4911	822.95	1052.53	1086.58	1130.68	711.48	897.053	1264.87	1429.16	564.981	635.042
728.74	6.97468	250.001	270.563									722.845	5.21894	850.328	1089.23	1140.61	1187.22	703.477	900.897	1253	1431.34	583.892	660.736
729.477	9.13782	260.021	280.468									723.582	4.79026	888.368	1125.26	1171.45	1218.08	702.723	888.458	1255.41	1423.79	608.454	697.571
730.213	9.59102	267.915	286.554									724.319	7.15854	913.665	1151.08	1220.03	1256.73	693.654	885.213	1263.17	1430.98	635.117	715.22
730.95	6.42764	276.932	293.136									725.056	5.79945	938.243	1189.79	1248.24	1300.07	689.319	879.704	1260.66	1411.99	652.438	742.511
731.687	10.5848	284.07	308.316									725.793	1.5406	957.164	1234.93	1298.36	1349.38	688.466	871.435	1255.77	1416.17	679.132	768.577
732.423	6.9562	300.924	313.933									726.53	4.89081	987.4	1276.95	1327.04	1387.18	681.091	878.263	1245.53	1409.28	708.896	799.829
733.16	9.58313	309.463	324.832									727.266	5.71584	1019.96	1307.3	1374.52	1427.96	673.2	863.365	1246.87	1395.57	732.717	832.79
733.896	11.8579	320.435	336.366									728.003	4.08132	1051.8	1342.94	1407.87	1458.85	667.976	847.373	1236.46	1392.09	757.04	861.249
734.632	7.33594	329.846	348.412									728.74	6.79352	1077.54	1376.46	1457.16	1511.42	657.703	849.099	1217.67	1393.67	783.881	883.338
735.369	10.1343	341.31	359.317									729.477	5.51888	1092.65	1405.51	1501.23	1551.35	645.076	833.442	1211.26	1382.07	801.867	908.083
736.105	11.3368	354.344	374.025									730.213	5.06696	1128.39	1445.17	1534.84	1598.9	641.151	831.795	1208.38	1357.4	833.967	945.349
736.841	12.886	362.985	385.49									730.95	6.06552	1147.02	1484.15	1578.57	1640.5	633.258	805.356	1191.1	1349.98	854.604	969.487
737.578	11.3736	376.601	393.889									731.687	4.52341	1192.19	1517.79	1610.61	1694.83	618.26	813.129	1178.53	1345.54	890.118	1005.1
738.314	12.6613	385.85	414.178									732.423	3.97497	1212.46	1556.11	1649.88	1729.47	613.049	800.144	1157.08	1313.73	912.166	1031.96
739.05	12.1973	399.051	419.987									733.16	3.8875	1231.43	1588	1690.43	1781.92	607.354	786.178	1157.93	1301.68	931.643	1067.98
739.786	10.3203	408.977	435.828									733.896	3.89229	1266.89	1634.22	1735.87	1820.96	593.438	782.621	1138.27	1284.09	971.17	1089.21
740.522	14.0093	430.076	449.304									734.632	6.79254	1279.08	1661.91	1783.63	1877.46	578.634	760.492	1117.69	1273.65	998.231	1130.73
741.258	11.3931	435.693	461.787									735.369	5.33862	1303.71	1688.36	1803.82	1909.42	579.648	740.349	1095.96	1252.59	1015.51	1174.59
741.994	13.7148	448.905	483.791									736.105	5.89516	1335.66	1725.2	1862.69	1966.99	557.591	733.811	1077.82	1230.36	1056.41	1201.8
742.73	15.0983	464.826	498.521									736.841	6.17075	1354.66	1753.94	1892.88	1989.88	543.661	722.431	1060.73	1206.2	1072.44	1232.15
743.466	13.763	474.13	508.676									737.578	4.64041	1373.38	1793.57	1924.68	2049.52	535.649	705.525	1038.45	1186.85	1104.15	1273.02
744.201	15.1309	485.023	526.61									738.314	3.82571	1397.29	1808.56	1964.59	2079.64	520.479	681.067	1023.65	1166.75	1132.32	1304.75
744.937	14.6303	497.618	542.068									739.05	7.73707	1414.16	1834.51	2012.09	2121.78	509.737	679.77	1000.72	1149.64	1169.21	1329.14
745.673	18.7529	517.992	553.818									739.786	4.38386	1432.43	1859.67	2034.2	2155.12	499.394	655.021	984.45	1106.19	1187.29	1371.51
746.408	15.7018	537.506	572.461									740.522	6.86729	1458.89	1892.72	2076.49	2182.79	485.38	642.504	952.265	1085.03	1212.95	1408.53
747.144	17.3764	553.227	594.085									741.258	7.35037	1483.03	1914.4	2103.03	2243.33	472.17	632.132	921.553	1069.94	1242.67	1430.01
747.879	17.3753	566.679	609.645									741.994	6.99545	1486.35	1937.19	2136.01	2296.07	458.386	610.537	903.149	1035.33	1272.99	1464.81
748.615	18.2667	583.968	632.427									742.73	5.89203	1493.08	1958.73	2167.35	2305.9	444.48	591.689	878.096	1011.4	1297.26	1490.96
749.35	18.4067	597.838	647.271									743.466	7.66663	1506.08	1964.13	2194.87	2327.61	430.255	580.632	859.124	991.858	1319.49	1530.46
750.086	22.0953	622.478	671.43									744.201	4.91985	1527.01	1995.51	2216.16	2380.19	418.559	559.192	840.366	963.362	1350.73	1562.93
750.821	18.6452	645.602	695.705									744.937	5.40484	1542.89	2005.57	2257.45	2414.38	404.338	545.05	819.765	934.198	1372.27	1604.68
751.556	24.4275	662.812	716.475									745.673	7.46386	1541.1	2032.03	2285.25	2434.9	390.36	530.867	792.008	910.311	1408.43	1636.73
752.292	24.1333	684.902	736.837									746.408	2.99082	1554.48	2033.76	2332.37	2474.62	385.535	515.075	773.033	880.983	1440.45	1671.31
753.027	21.4918	708.357	754.438									747.144	6.01129	1581.72	2059.43	2354.55	2516.1	371.761	503.446	745.494	859.615	1458.21	1696.97
753.762	26.527	727.015	779.097									747.879	8.12105	1576.24	2086.54	2393.44	2532.45	357.232	488.491	722.962	835.24	1489.83	1740.45
754.497	27.9778	758.336	802.259									748.615	7.5717	1586.46	2089.22	2397.86	2564.06	349.056	473.799	706.819	800.14	1529.48	1778.4
755.232	25.3742	772.439	835.776									749.35	7.30575	1588.48	2099.31	2420.86	2604.36	335.78	456.942	686.93	796.042	1559.16	1808.6
755.967	27.1051	788.512	853.466									750.086	4.57144	1602.1	2124.1	2446.86	2627.34	325.525	442.192	663.811	766.383	1575.34	1856
756.702	27.1932	807.886	867.711									750.821	7.5537	1612.47	2131.67	2475.13	2677.74	317.351	430.943	641.012	738.732	1626.63	1883.74
757.437	26.343	831.346	899.042									751.556	4.71239	1611.16	2144.14	2498.34	2689.91	309.575	415.46	620.785	712.244	1646.55	1908.23
758.172	29.9805	850.447	920.801									752.292	3.95786	1626.1	2157.32	2533.03	2723.87	299.832	404.956	602.27	698.127	1669.54	1967.54
758.907	29.4769	874.047	928.172									753.027	4.35644	1620.69	2150.53	2541.26	2750.56	289.848	392.757	579.794	668.568	1697.75	1986.54
759.642	34.1467	895.795	971.969									753.762	6.99613	1613.29	2163.55	2561.46	2752.3	277.027	382.067	566.784	653.167	1720.85	2025.67
760.376	33.0737	925.15	987.138									754.497	2.73909	1617.63	2168.28	2567.11	2773.32	278.898	363.125	548.6	634.783	1740.3	2059.99
761.111	33.9778	945.257	1021.89									755.232	7.47458	1621.49	2165.27	2578.43	2803.26	263.184	351.207	526.466	614.784	1776.69	2089.54
761.846	37.2938	966.258	1042.18									755.967	3.64687	1600.48	2145.64	2575.38	2779.8	252.225	336.497	504.056	588.033	1796.13	2112.62
762.58	40.0244	992.379	1075.21									756.702	3.95538	1588.28	2152.81	2574.85	2793.78	238.213	329.681	489.28	564.432	1816.21	2134.92
763.315	39.0592	1020.29	1090.45									757.437	8.84728	1577.6	2142.23	2596.43	2814.73	235.596	312.637	474.472	544.555	1842.22	2149.79
764.049	39.823	1041.71	1121.97									758.172	3.89746	1572.68	2128.72	2571.83	2800.88	225.653	303.902	457.402	526.458	1863.99	2202.17
764.784	41.2788	1069.3	1170.16									758.907	5.73442	1566.91	2112.68	2591.56	2807.15	218.512	295.172	441.047	506.239	1870.53	2218.72
765.518	44.6644	1090.77	1181.46									759.642	2.32359	1551.25	2092.65	2563.33	2793.87	206.194	277.316	419.762	481.994	1882.01	2240.65
766.252	48.0948	1124.77	1215.6									760.376	5.47846	1533.87	2080.9	2555.6	2777.38	200.268	270.677	408.146	461.713	1898.19	2257.94
766.987	47.7271	1145.03	1244.07									761.111	7.14249	1511.35	2075.61	2561.81	2772.82	202.745	262.231	390.184	450.181	1930.21	2285.19
767.721	44.8161	1181.25	1276.15									761.846	3.38103	1503.33	2040.91	2541.41	2762.92	188.006	246.713	373.45	432.977	1930.98	2296.64
768.455	48.7876	1214.49	1302.84									762.58	3.39539	1484.5	2025.09	2502.3	2745.94	185.306	244.674	365.364	423.806	1937.74	2319.56
769.189	51.1416	1229.85	1329.58									763.315	5.99321	1471.75	2003.28	2503.3	2744.06	173.7	232.909	348.019	402.475	1971.87	2324.75
769.923	48.6573	1251.58	1365.08									764.049	6.10275	1446.56	1986.08	2485.47	2725.14	167.464	223.112	334.41	385.301	1973.15	2372.11
770.657	50.0592	1281.52	1390.57									764.784	8.94201	1442.06	1961	2490.14	2691.96	164.387	220.119	328.879	374.629	1993.03	2376.5
771.391	51.6101	1304.37	1412.44									765.518	6.38062	1411.79	1942.32	2457.9	2676.52	158.574	210.77	312.964	365.788	2001.84	2393.68
772.125	54.0283	1325.86	1437.59									766.252	8.29583	1399.79	1927.05	2427.74	2668.32	149.85	204.246	302.43	346.955	2002.97	2416.29
772.859	58.9682	1344.3	1460.5									766.987	5.79468	1368.92	1898.23	2398.58	2624.99	147.29	195.334	288.575	331.245	2018.66	2431.34
773.593	60.8454	1374.82	1497.94									767.721	6.43243	1359.03	1864.98	2359.96	2598.07	140.143	182.639	274.907	322.887	2042.24	2432.2
774.327	57.2896	1397.56	1516.09									768.455	5.93937	1340.18	1859.02	2352.09	2571.64	128.757	182.635	271.832	308.105	2034.44	2447.76
775.061	60.242	1414.26	1524.41									769.189	4.58144	1311.25	1813.72	2308.09	2539.4	128.28	171.218	261.142	301.736	2033.63	2448.62
775.794	59.9152	1441.83	1556.58									769.923	6.53765	1283.42	1791.21	2268.24	2502.1	125.609	169.229	246.287	287.335	2030.85	2476.48
776.528	66.6243	1452.79	1579.62									770.657	4.19852	1265.05	1741.95	2230.6	2468.3	122.295	163.527	245.129	277.856	2047.8	2457.1
777.262	63.2413	1453.44	1598.4									771.391	6.14149	1239.83	1725.65	2201.99	2422.76	118.735	156.877	228.205	266.885	2023.57	2463.28
777.995	65.865	1480.68	1621.8									772.125	7.45591	1199.86	1682.33	2145.9	2360.61	110.758	146.309	223.569	261.497	2026.39	2460.23
778.729	61.4107	1493.02	1615.5									772.859	8.81259	1167.18	1646.76	2105.12	2311.51	108.58	148.073	216.833	245.991	2014.93	2469.81
779.462	60.3229	1511.77	1639.26									773.593	8.75474	1152.56	1618.75	2052.88	2280.28	101.227	136.683	209.019	240.865	2013.04	2462.93
780.196	64.9196	1518.96	1659.96									774.327	5.81676	1115.17	1577.33	2007.88	2212.89	96.7997	132.688	197.88	228.829	2007.22	2432.94
780.929	69.0568	1532.4	1675.73									775.061	7.80508	1087.43	1542.77	1958.64	2156.18	95.7496	128.729	188.531	214.365	1988.1	2439.14
781.662	68.9146	1533.09	1678.1									775.794	2.64818	1058.83	1499.53	1910.11	2111.15	90.4796	119.83	177.208	214.834	1985.7	2422.43
782.396	61.2312	1543.21	1681.52									776.528	6.97231	1037.55	1459.65	1851.42	2047.65	86.3238	121.628	174.529	203.746	1960.21	2407.33
783.129	63.7635	1547.78	1691.16									777.262	2.44949	1003.84	1422.26	1808.72	1984.31	83.0599	111.674	169.905	193.287	1937.32	2372.88
783.862	71.2127	1555.8	1679.11									777.995	7.1568	981.041	1371.42	1768.29	1940.95	79.9549	107.128	161.14	188.313	1917.91	2355.37
784.595	62.235	1548.84	1698.67									778.729	2.68952	946.935	1329.86	1711.43	1875.16	77.4357	101.753	153.863	179.525	1895.33	2348.29
785.328	63.1406	1546.36	1702.01									779.462	6.16684	918.523	1301.2	1638.14	1825.16	72.6566	98.6694	148.004	170.765	1865.41	2318.06
786.061	66.5841	1534.22	1678.2									780.196	6.76246	892.532	1263.9	1617.24	1781.23	72.2456	98.2811	137.729	164.891	1842.77	2286.05
786.794	67.2018	1534.83	1680.74									780.929	4.08218	862.7	1217.4	1545.78	1712.02	72.572	95.7043	140.041	161.246	1815.55	2267.42
787.527	65.4978	1531.08	1678.54									781.662	5.69543	833.81	1173.03	1493.68	1648.26	67.6616	86.2287	130.995	152.182	1782.78	2237.73
788.26	63.0905	1513.58	1679.52									782.396	7.63964	804.101	1139.33	1448.11	1596.23	63.1696	84.0361	124.287	147.32	1765.33	2194.63
788.993	60.0683	1502.65	1646.74									783.129	6.27369	772.691	1106.11	1400.17	1535	64.2198	83.6112	122.964	143.725	1717.28	2157.35
789.726	62.7689	1488.22	1641.58									783.862	1.94633	754.946	1081.7	1341.48	1488.71	59.0768	82.3182	113.116	128.229	1704.87	2148.75
790.458	60.6941	1465.9	1630.8									784.595	2.18975	722.733	1033.79	1298.64	1436.59	58.6623	73.4142	112.023	127.812	1683	2078.99
791.191	69.6782	1461.82	1617.91									785.328	6.26763	701.162	995.741	1247.03	1384.57	56.989	75.0955	106.782	123.379	1642.23	2047.43
791.924	63.3876	1439.21	1594.1									786.061	5.92633	668.514	962.158	1208.74	1322.97	50.0833	69.1406	103.769	112.949	1613.24	2010.54
792.656	56.6732	1414.79	1578.08									786.794	5.81331	657.601	924.316	1151.03	1279.16	51.3896	67.5506	96.966	115.22	1578.78	1967.22
793.389	57.6842	1387.07	1546.25									787.527	3.96956	628.125	896.654	1125.25	1245.04	47.051	65.4978	96.904	105.894	1539.61	1934.46
794.121	59.0183	1367.94	1519									788.26	8.2088	609.679	862.627	1079.46	1186.41	45.2656	61.2142	95.5738	106.832	1499.16	1884.74
794.854	56.8194	1351.79	1488.21									788.993	6.84472	590.416	824.788	1038.51	1141.18	44.1366	57.8261	87.3291	104.441	1460.05	1839.69
795.586	51.3127	1316.66	1455.07									789.726	6.27689	564.683	795.389	993.051	1097.39	45.3594	59.2159	86.3369	96.6404	1432.43	1799.34
796.318	54.0551	1295.62	1445.58									790.458	6.16424	538.542	759.625	951.783	1051.83	43.2683	56.308	81.0835	93.7676	1388.02	1754.56
797.051	54.3342	1268.99	1401.5									791.191	7.00343	514.811	744.5	919.111	1016.21	38.8156	50.9232	77.9873	88.077	1360.8	1714.77
797.783	50.6968	1238.12	1381.67									791.924	5.83833	496.616	717.4	873.844	963.563	39.796	51.5918	75.3026	85.0729	1311.6	1651.29
798.515	51.2035	1211.69	1350.34									792.656	6.36372	476.319	682.599	851.298	943.872	35.3007	45.9869	72.4024	84.6495	1277.55	1624.91
799.247	47.1761	1183.98	1312.26									793.389	8.8095	463.404	660.713	808.423	908.586	36.6862	44.6509	74.9411	80.4923	1252.52	1570.99
799.979	45.5217	1153.84	1288.79									794.121	5.5632	441.065	628.037	782.597	861.812	28.7835	43.659	65.3071	80.4245	1207.94	1522.99
800.711	46.9519	1132.35	1236.53									794.854	5.57291	421.36	602.601	748.829	827.94	35.8604	42.4025	64.6942	65.7845	1171.4	1477.06
801.443	44.3266	1096.8	1204.52									795.586	4.12443	396.551	576.085	709.523	802.807	30.3267	43.3065	61.6238	67.0826	1129.36	1422.44
802.175	43.3847	1046.29	1169.36									796.318	1.83031	393.883	569.226	680.631	760.189	30.7492	40.5109	56.1295	67.1114	1091.96	1389.33
802.907	41.3689	1027.52	1138.21									797.051	4.7942	375.791	536.95	662.337	724.538	27.6588	40.0746	58.7596	66.2582	1068.12	1333.28
803.639	39.1176	1003.01	1093.39									797.783	7.0481	361.802	513.027	637.296	706.788	30.4181	39.321	54.901	65.9059	1026.3	1299.82
804.371	38.8685	957.823	1061.17									798.515	6.43136	335.668	494.72	597.498	672.448	28.4464	35.8672	51.4509	63.3242	994.264	1253.5
805.103	41.7738	936.761	1038.82									799.247	3.34319	331.099	472.627	582.333	632.234	26.1264	28.8505	50.3954	59.6821	969.4	1212.71
805.834	36.7245	906.217	1000.23									799.979	7.21382	317.035	450.739	562.554	616.284	29.2284	35.8203	51.7405	53.7305	920.757	1168.27
806.566	34.3609	858.893	964.31									800.711	7.63751	307.003	437.091	526.863	585.459	24.7906	29.7988	47.4527	53.3374	895.467	1117.33
807.298	31.0772	835.978	939.31									801.443	8.84007	292.354	415.862	509.062	565.638	24.4996	33.7185	48.3678	57.8393	858.623	1081.65
808.029	31.8651	814.763	895.073									802.175	4.17404	271.313	398.431	484.568	539.969	21.1232	30.7361	44.5231	49.7091	827.599	1048.7
808.761	35.3572	780.99	871.927									802.907	3.79531	270.479	382.314	466.697	519.325	21.6333	25.4286	40.9894	50.0981	797.015	1004.62
809.492	30.8431	759.742	843.44									803.639	3.54463	252.808	369.655	444.472	491.438	27.4709	34.4336	36.8389	44.9409	753.994	961.609
810.223	29.2084	720.518	811.596									804.371	6.88164	243.406	354.15	426.279	472.922	20.8998	24.2132	38.4862	37.3393	732.895	936.286
810.955	29.2221	705.714	783.949									805.103	0.514139	231.234	331.362	408.74	454.884	18.3805	25.964	37.4036	42.1594	707.84	891.388
811.686	25.8313	679.032	741.954									805.834	6.46559	222.933	317.331	394.401	433.582	22.2416	23.1468	34.2676	43.966	678.499	866.13
812.417	20.9789	647.292	713.681									806.566	-0.518655	214.983	299.523	377.581	412.201	22.0429	24.8955	36.0466	35.9169	648.449	834.646
813.148	27.4381	626.66	692.78									807.298	4.14363	204.203	298.859	360.108	391.314	19.2938	23.049	35.9978	41.5658	625.688	796.743
813.88	26.0842	597.099	665.351									808.029	2.72019	197.149	281.605	349.48	373.055	16.1916	20.4662	30.4403	38.7304	602.847	761.136
814.611	24.0698	574.819	647.3									808.761	1.82657	181.353	271.768	333.219	360.878	18.1353	17.222	30.008	34.9658	570.021	730.629
815.342	26.6472	551.978	613.293									809.492	6.19498	174.514	253.072	311.99	348.105	18.3213	21.8801	27.9433	32.293	557.812	702.142
816.073	18.7473	530.631	597.605									810.223	5.44339	170.736	247.608	300.448	337.888	13.9404	13.8076	30.005	34.3863	524.291	670.466
816.804	17.6989	512.45	568.133									810.955	6.2429	160.854	246.927	285.447	323.701	15.1424	19.3929	27.6282	34.4024	502.886	657.63
817.535	17.9965	494.286	551.298									811.686	2.64936	156.047	225.593	277.256	309.048	15.6312	18.1481	27.0235	30.7326	480.197	615.579
818.265	22.0585	482.236	534.815									812.417	1.99167	147.782	214.967	263.564	294.368	11.4189	18.8545	28.0161	30.4061	463.926	586.081
818.996	18.7846	456.396	506.21									813.148	8.16452	141.34	204.381	252.029	277.058	14.9906	18.8721	25.0289	23.0213	448.781	566.564
819.727	20.8658	440.408	488.121									813.88	4.46	132.313	204.079	243.408	267.059	13.6503	16.4885	24.8679	25.5436	432.079	550.877
820.458	23.3129	429.207	465.98									814.611	8.43122	132.588	187.935	234.986	251.985	11.151	14.9586	19.1742	29.6453	407.01	532.391
821.188	21.4416	401.961	453.059									815.342	1.63146	126.438	184.899	224.598	245.263	8.02135	13.7315	20.9371	25.0157	397.261	495.964
821.919	21.0534	388.647	430.894									816.073	-1.76605	122.265	176.741	210.975	240.862	10.5963	13.7209	22.2794	23.5021	380.245	482.947
822.649	23.8342	373.403	424.05									816.804	5.03737	114.498	162.693	202.175	222.597	13.8868	9.25786	24.7784	22.8724	370.995	465.48
823.38	29.9094	372.871	403.92									817.535	4.25872	115.81	161.694	196.588	219.393	11.1276	17.447	17.9965	24.7281	349.215	447.44
824.11	25.5626	350.208	396.647									818.265	6.52045	107.518	162.317	188.399	203.799	13.5958	10.2662	15.6768	23.7233	333.93	425.078
824.841	26.6226	339.863	376.681									818.996	3.20034	98.2364	143.459	176.714	202.874	9.8793	12.6622	18.9237	18.5063	315.999	411.452
825.571	23.9283	322.396	352.412									819.727	7.37259	100.295	145.922	173.186	184.176	11.824	15.3016	21.0049	26.2909	304.502	392.834
826.301	15.5791	308.58	339.596									820.458	4.99562	88.5335	136.963	163.19	185.809	13.8767	12.3503	17.2071	23.0354	291.689	372.59
827.032	18.0579	291.093	326.198									821.188	6.82233	95.2342	135.054	155.104	175.292	14.6193	11.5562	20.6062	18.3785	286.12	360.47
827.762	19.4418	282.486	317.888									821.919	6.87746	90.6702	128.847	149.058	168.147	15.0181	18.106	22.8781	26.6677	272.993	342.61
828.492	21.987	267.75	296.102									822.649	10.924	89.6621	130.095	152.511	165.137	16.7407	17.3082	27.8066	25.6785	267.284	342.049
829.222	16.5661	256.991	294.445									823.38	16.379	96.7071	127.471	153.962	163.22	23.9275	26.3488	29.6246	32.0458	262.776	325.87
829.952	10.2541	253.609	278.45									824.11	21.7282	89.0432	126.109	151.53	163.033	23.7164	25.1366	33.6575	35.2196	250.94	326.776
830.682	8.71519	235.891	264.361									824.841	19.6837	83.1248	114.987	141.043	154.213	28.1803	26.1978	28.1803	30.3044	234.364	305.452
831.412	10.5672	216.482	254.494									825.571	10.1943	84.5279	113.27	124.597	151.357	19.5391	22.3709	25.3442	24.9195	226.965	296.768
832.142	13.2792	214.976	239.026									826.301	6.86052	71.4637	104.051	119.773	135.495	12.2918	19.4381	19.1523	22.4396	210.675	271.562
832.872	14.1246	209.073	234.674									827.032	9.67902	73.6762	97.0792	122.36	125.827	16.1799	18.3468	20.8027	22.8252	203.115	254.544
833.601	14.7822	195.682	220.27									827.762	14.3637	73.2694	95.4679	120.713	127.097	19.1516	20.0221	19.1516	26.406	193.983	252.453
834.331	7.32138	191.527	208.659									828.492	13.4526	67.9862	94.6021	114.419	124.256	13.5972	20.8298	22.421	23.7229	190.072	238.82
835.061	14.5502	184.891	202.087									829.222	15.8458	63.9596	89.3129	107.176	111.353	13.2529	17.2864	18.4388	24.9212	177.473	225.155
835.79	15.1466	176.413	197.054									829.952	9.53201	58.3474	85.3548	98.2086	109.907	12.8538	15.5978	15.0201	18.1975	170.276	211.726
836.52	12.4021	164.664	182.893									830.682	8.27943	60.5706	78.001	90.638	97.0291	9.87722	15.2516	19.6092	24.693	161.957	196.818
837.249	13.458	155.664	181.981									831.412	8.5125	56.7989	79.1075	86.1523	100.829	10.8608	14.3832	17.6121	14.8235	149.703	189.036
837.979	10.567	151.362	168.328									832.142	6.9347	48.1003	67.1338	80.7082	98.2662	7.67244	7.52489	12.0988	8.85281	148.727	182.958
838.708	9.35029	138.919	169.196									832.872	4.70819	47.229	67.9745	80.0392	83.2761	8.53359	11.1819	14.8602	11.6233	140.069	182.295
839.438	8.16853	141.687	161.143									833.601	7.61066	49.4693	64.9833	77.7165	81.8146	10.6842	11.416	16.0995	11.1233	136.699	172.118
840.167	12.4365	134.554	151.336									834.331	7.32138	47.0033	67.9424	78.7781	78.1924	12.4464	15.5213	12.8856	15.2285	137.203	171.027
840.896	10.7165	127.843	140.824									835.061	8.9653	42.181	60.2586	73.0452	81.2756	11.1699	8.81833	18.5185	18.2245	127.719	154.321
841.626	8.34773	120.056	140.09									835.79	11.5827	45.7368	57.3194	71.7235	73.5055	14.2556	10.5432	16.0376	15.4436	121.47	151.317
842.355	4.37759	119.855	132.082									836.52	4.33326	41.6889	63.8035	68.7345	75.0102	10.7584	13.448	12.4021	12.2527	115.504	144.492
843.084	8.70285	113.587	122.29									837.249	0.149533	34.243	57.5701	61.458	67.1402	4.03739	7.92524	11.215	14.8037	107.215	144.15
843.813	6.42263	109.035	115.01									837.979	3.86962	38.845	50.9003	62.658	66.6765	4.61377	7.88806	11.0135	12.5018	104.628	131.269
844.542	7.95349	96.4923	110.298									838.708	0.742087	36.6591	45.5641	58.1796	58.4764	4.15569	6.8272	6.23353	10.8345	94.6903	129.42
845.271	8.03644	97.0437	111.6									839.438	4.30704	32.2286	46.1893	60.0016	60.1501	8.31705	9.5052	10.5448	10.8419	95.9431	123.419
846	4.73859	93.2432	104.402									840.167	8.84039	30.1173	47.4984	54.241	66.3779	8.24104	9.73941	7.49186	7.94137	88.8534	118.521
846.729	4.58024	89.7728	98.9332									840.896	6.64121	31.5457	45.5828	46.6394	62.3368	7.39589	12.5277	9.65994	12.9805	85.7319	106.259
847.457	7.73409	89.1695	95.5388									841.626	3.49087	30.8107	43.7118	52.9702	59.193	6.22286	10.7762	12.5975	11.6868	83.022	106.244
848.186	7.83087	76.8027	92.1633									842.355	1.05666	32.3036	36.9831	49.8139	49.8139	1.35856	12.378	11.9252	5.73615	80.3061	105.062
848.915	-1.50808	71.0308	86.7148									843.084	7.35241	30.61	36.762	42.4639	50.7166	4.80157	1.95064	8.10265	4.80157	73.5241	91.68
849.644	8.055	73.7108	84.8055									843.813	1.04554	25.2424	30.6195	40.9256	44.0623	3.58473	8.81245	6.42263	10.3061	71.9933	93.0535
850.372	5.35608	72.6896	75.7502									844.542	3.90171	23.5603	37.6665	45.3199	44.7196	3.15138	2.70119	5.85257	11.7051	65.8789	87.1883
851.101	5.99163	66.0615	74.0504									845.271	-0.454893	21.9865	35.0267	42.6083	43.6697	8.49133	6.21687	8.94622	8.3397	66.1111	86.1263
851.829	2.90819	64.4393	74.8476									846	1.07	21.4001	35.0044	37.7559	38.0616	-1.98715	8.25432	9.47718	7.33717	63.5888	79.7917
852.558	0.304445	61.9545	78.3946									846.729	3.66419	19.695	27.3288	36.1839	41.9856	9.16048	4.27489	2.90082	9.16048	58.6271	75.4213
853.286	-0.303581	57.6803	68.6092									847.457	1.81979	20.1693	31.8463	35.0309	36.8507	9.70553	6.5209	8.79563	3.63957	55.5035	72.7914
854.014	4.56723	57.0904	64.7024									848.186	4.21662	20.7819	30.7211	31.1729	36.1425	6.02374	8.28265	6.77671	10.0898	56.4726	75.2968
854.743	4.29009	56.5372	62.6659									848.915	6.03234	23.0737	25.939	33.6303	33.9319	6.18314	3.6194	3.6194	9.65174	55.1959	69.2211
855.471	1.2356	50.9685	58.5365									849.644	3.49557	22.1892	22.4932	29.3324	36.0195	5.01538	4.40745	3.64755	7.14311	50.1538	64.136
856.199	0.154584	46.6843	58.4327									850.372	4.59092	17.9046	26.0152	28.0046	29.0758	3.51971	7.65154	5.66214	6.12123	50.6532	62.2835
856.927	6.78001	51.4664	56.5515									851.101	6.75979	17.514	21.8157	28.8827	26.5783	1.84358	5.3771	1.53632	7.98884	48.2403	60.3772
857.655	3.07207	47.7708	56.3726									851.829	3.6735	16.2246	25.1023	28.9288	35.9697	4.74494	3.82656	3.97962	5.05106	36.735	57.0923
858.383	3.82845	37.3657	51.4544									852.558	7.76335	14.1567	23.29	30.14	27.2478	-0.304445	5.78445	10.3511	6.24112	45.6667	53.1256
859.111	4.46189	41.234	43.2341									853.286	4.25013	19.5809	28.3848	25.6526	28.8401	-0.455371	4.09834	4.85729	8.34846	40.8316	47.9657
859.839	5.88802	40.4414	48.4987									854.014	1.06569	19.7913	17.8122	26.7944	30.7527	3.3493	4.26275	6.24188	4.56723	39.5827	47.4992
860.567	5.62518	42.8139	43.7514									854.743	2.91113	12.8703	19.3054	23.1358	27.1195	7.66087	7.50765	3.06435	3.67722	36.4657	49.336
861.295	5.31881	40.9861	41.1426									855.471	0.15445	13.2827	19.3062	18.9973	25.0209	7.87694	5.71464	2.1623	2.62565	35.9868	48.1884
862.023	3.58746	36.6545	45.0773									856.199	2.62793	18.2409	19.323	18.0863	26.4338	1.23667	4.17377	2.00959	5.10127	38.8006	45.6022
862.75	4.96365	38.6234	40.0194									856.927	0.616365	17.8746	21.1105	20.8023	25.8873	2.15728	4.62273	7.24228	4.93092	35.441	41.2964
863.478	-1.08384	30.5024	35.6119									857.655	3.84009	11.2131	13.5171	20.5829	24.2694	3.53288	3.07207	3.68649	4.91532	33.9464	41.6266
864.206	7.31603	29.4198	35.8019									858.383	4.441	10.5665	17.9172	23.1238	19.7548	7.50376	-1.83766	5.05356	4.90042	31.5464	36.1406
864.933	5.65884	30.8093	32.8527									859.111	2.30787	12.4625	9.84692	22.6171	19.2323	3.38488	8.30834	3.84645	4.92346	29.5408	40.0031
865.661	1.74422	25.8462	34.0916									859.839	-1.70443	9.76172	15.6497	15.8047	17.3542	2.63412	5.57813	5.26823	5.57813	30.2149	37.3425
866.388	2.38369	24.6314	31.4647									860.567	-0.31251	12.1879	12.5004	20.1569	22.5007	3.59387	3.59387	0.62502	2.96885	23.907	33.2823
867.116	5.86364	24.5639	32.8047									861.295	9.07326	10.3247	13.4535	18.6158	16.5822	1.87723	2.81584	1.87723	0.156436	29.8792	36.2931
867.843	0.631266	27.7757	31.4055									862.023	2.18368	12.6341	10.7624	16.0656	17.0015	1.09184	1.71574	5.45919	3.11953	29.1677	36.4986
868.57	3.95046	29.3914	27.3372									862.75	4.80854	10.3926	17.3728	19.6995	16.287	3.87785	3.72274	6.82502	1.86137	27.4552	35.0558
869.298	10.0337	22.1379	28.9863									863.478	0.464503	9.4449	15.7931	15.0189	21.2123	3.87086	5.72887	4.02569	6.50305	29.4185	30.812
870.025	4.67054	23.0306	28.9896									864.206	11.2075	10.7406	15.566	14.7877	19.7689	5.13679	3.26887	8.09434	6.84905	23.9717	26.7736
870.752	1.30053	24.0598	21.7839									864.933	5.50165	7.54512	13.0468	12.1036	16.3478	2.51504	1.5719	0.31438	4.87289	24.2073	28.923
871.479	3.74856	23.7952	23.4692									865.661	10.1482	10.6239	13.4781	18.3936	13.3195	7.45258	-1.42709	6.18406	11.0996	20.7721	23.6263
872.206	3.74727	20.3656	26.068									866.388	0.476737	10.0115	12.2363	9.37583	15.4145	5.87976	5.87976	3.01934	5.56193	24.7903	28.7631
872.933	5.53468	21.162	23.9294									867.116	6.02212	7.76537	9.66709	14.8968	16.0062	2.85258	3.32801	7.76537	4.7543	18.8587	18.3833
873.66	4.5733	15.6799	24.3365									867.843	4.41886	8.67991	11.8362	16.0973	14.0457	3.47196	5.20794	6.31266	3.15633	21.9365	20.674
874.387	-0.164595	16.6241	22.7141									868.57	1.42216	5.84668	4.42451	10.2712	11.6934	1.89622	6.47875	5.37262	6.32073	16.908	23.2287
875.114	-1.33223	16.4863	22.1483									869.298	6.37061	9.07812	6.21134	11.6264	13.5375	4.1409	4.30016	3.34457	2.86678	18.1562	19.5896
875.841	4.71305	18.6839	21.7137									870.025	5.1537	8.05266	12.5622	11.7569	11.9179	5.47581	8.69687	3.54317	5.47581	15.4611	22.0643
876.567	6.2389	14.164	21.5832									870.752	0.975397	8.29087	9.75397	13.0053	15.1186	9.1037	3.73902	0	7.15291	18.0448	23.7347
877.294	7.92048	17.3576	20.7281									871.479	3.91154	8.63799	14.8313	15.8091	14.8313	2.11875	2.28173	4.40048	1.95577	12.3865	22.0024
878.021	7.55379	13.429	25.515									872.206	3.2585	7.65747	11.2418	11.5677	10.4272	8.79794	4.88775	3.58435	7.98332	19.0622	20.2027
878.747	7.88606	17.9534	16.2755									872.933	8.79037	8.13923	17.9063	10.7438	16.1157	8.79037	4.55797	7.16253	7.81367	13.5111	18.2319
879.474	5.22238	16.1725	18.531									873.66	7.34995	6.36996	12.4132	10.7799	17.4765	3.91997	6.85995	-1.30666	0.489997	18.7832	17.4765
880.2	2.72374	16.5127	18.3853									874.387	4.77326	10.0403	7.24218	12.0154	13.003	-0.822975	7.07759	6.5838	4.93785	15.3073	18.4346
880.927	11.4889	19.8913	25.3785									875.114	8.826	7.32724	12.3231	13.1557	13.3223	5.99502	4.66279	3.66362	8.49294	13.9884	21.4822
881.653	17.7064	20.4569	27.5051									875.841	10.2677	10.2677	10.436	17.3373	8.58448	-2.86149	-1.51491	3.53479	9.08945	11.2777	15.4857
882.379	13.5337	30.151	29.8084									876.567	3.541	10.7916	12.815	13.6581	9.61128	8.43095	6.40752	3.20376	14.5012	12.4778	9.61128
883.105	23.0446	27.3121	27.1414									877.294	1.85373	6.74083	11.1224	16.3465	6.40379	1.68521	5.56119	6.06675	7.24639	14.9984	20.391
883.832	16.5085	28.0814	20.593									878.021	7.88952	8.22524	17.6255	9.56814	7.21807	9.23241	5.37159	9.23241	5.20372	10.0717	21.4863
884.558	9.07561	22.4322	23.2883									878.747	0.503366	8.55722	7.55049	9.73174	11.7452	2.85241	8.72501	5.70481	5.70481	10.9063	14.9332
885.284	12.6164	19.5295	19.5295									879.474	9.60244	14.3194	11.1186	14.4879	11.9609	10.2763	4.71699	6.73855	4.38006	12.4663	14.8248
886.01	10.7989	15.5017	22.1203									880.2	8.68193	11.7461	12.4271	18.0448	13.2783	7.14983	9.70334	9.87357	11.2354	16.5127	21.9602
886.736	11.9142	16.2944	15.0679									880.927	11.3175	21.0916	16.1188	17.3191	9.94564	14.0611	12.6893	18.8624	15.4329	20.2342	22.8064
887.462	8.23135	7.35568	15.587									881.653	20.6288	26.6455	26.1298	26.4736	24.0669	17.1907	20.1131	23.895	22.0041	37.4757	30.9432
888.188	5.59421	11.7129	8.2165									882.379	24.1551	29.9797	33.0634	29.2945	27.0674	24.3264	20.2149	28.4379	23.6412	37.0036	34.2625
888.914	12.7713	13.9959	11.5466									883.105	27.4828	29.5312	30.5554	33.4573	29.0191	25.093	23.2153	21.8497	28.3363	33.9694	29.3605
889.639	5.80055	11.7769	9.66758									883.832	18.8911	24.8478	30.4641	28.0814	28.9324	17.5296	20.4229	19.7421	19.7421	29.2728	32.8468
890.365	5.50342	7.45625	11.5394									884.558	14.0415	21.2335	24.3158	24.3158	17.8087	20.3773	24.487	20.5485	11.6442	23.1171	22.2609
891.091	2.1532	12.2015	9.86885									885.284	15.9001	22.6404	22.2947	21.4306	20.9121	17.6284	13.6533	9.50549	10.7153	13.3077	24.023
891.816	1.62454	13.3573	9.3862									886.01	12.0181	10.7989	19.1593	13.9341	18.811	11.4956	10.7989	12.889	9.75385	17.2434	17.2434
892.542	7.96693	8.51013	10.1397									886.736	9.46126	5.25625	13.8415	16.82	16.1192	7.53396	11.739	10.3373	8.76042	12.9654	19.2729
893.267	8.3316	7.06375	14.4897									887.462	9.98271	12.0843	13.8357	16.2876	16.813	6.83027	4.02811	10.5081	12.6097	14.186	14.8865
893.993	9.05236	11.0439	14.8459									888.188	8.04168	8.91578	9.96469	9.61505	9.26542	8.2165	4.5453	11.7129	7.51722	16.2582	15.3841
894.718	11.2571	9.80454	10.7124									888.914	6.99795	14.3458	6.64806	11.7216	9.27229	7.1729	13.9959	8.2226	5.07352	13.9959	13.9959
895.444	7.1262	16.8105	14.4351									889.639	3.51548	10.0191	9.4918	11.4253	12.3042	7.38251	6.1521	7.38251	9.66758	7.38251	10.1949
896.169	11.8135	13.6594	10.8906									890.365	11.0068	0.887648	11.1844	15.9777	8.87648	6.74613	3.90565	6.03601	8.69895	11.0068	7.98883
896.894	12.3088	7.08687	14.1737									891.091	8.43338	3.94754	11.3043	11.3043	13.4575	3.94754	8.61281	5.56244	7.89508	10.5866	13.9958
897.619	6.94174	5.44082	15.1968									891.816	11.3717	4.15159	8.66419	6.49814	14.8013	5.23461	6.85915	9.74721	10.2887	9.74721	10.8302
898.345	3.76573	9.60261	17.3223									892.542	7.6048	6.15626	7.78586	8.32906	11.9504	-0.724266	7.42373	3.62133	4.8888	8.87226	11.4072
899.07	3.20241	8.85371	12.0561									893.267	10.1428	10.1428	3.80356	6.52039	8.51272	8.15048	1.44897	5.25253	4.89029	14.1275	11.954
899.795	4.89145	10.7236	11.6642									893.993	7.06084	5.61246	8.14712	10.6818	10.5007	11.9491	4.88827	10.1386	9.05236	11.0439	15.9321
900.52	8.12869	5.2931	9.64101									894.718	15.6146	10.5308	14.3437	10.3492	17.0672	8.35201	8.17045	17.7934	13.9805	15.6146	16.1593
901.245	6.66195	8.7557	6.85229									895.444	10.9634	15.5315	17.5414	17.3587	16.4451	8.03981	17.5414	6.21258	15.7142	21.744	15.3487
901.97	5.20529	3.27741	8.09712									896.169	12.9211	16.2436	18.4587	9.78309	15.5053	14.2132	14.0286	11.629	14.3978	11.2598	14.3978
902.694	8.55337	7.5814	8.16458									896.894	15.1062	9.13833	10.6303	9.88432	17.9037	11.5628	10.8168	8.01935	13.0548	14.1737	15.4792
903.419	0	10.7401	4.49132									897.619	9.19311	17.6358	12.3826	13.6959	11.4445	9.94357	6.19128	14.0711	7.87981	10.694	13.8835
904.144	8.20275	10.5464	11.1323									898.345	5.27202	10.544	10.3558	10.9206	11.1089	7.71974	12.0503	9.41432	11.6738	9.79089	9.97918
904.868	14.4369	8.38903	15.8026									899.07	4.8978	3.76754	2.63728	11.1142	14.3166	8.28858	7.91183	6.78157	5.27455	4.8978	17.1423
905.593	18.6147	8.81747	13.7161									899.795	5.83211	9.78289	8.0897	9.40663	6.77277	5.07958	5.83211	2.63386	2.06946	10.3473	9.21849
906.318	8.8572	14.1715	15.5493									900.52	1.89039	10.5862	-3.21367	3.78079	6.80542	9.45197	9.07389	3.40271	1.89039	12.2876	9.64101
907.042	10.3639	5.18197	13.1542									901.245	3.80683	9.51707	10.2784	6.47161	7.804	8.7557	0.951707	0.190341	11.4205	3.42614	15.4177
907.767	7.24464	10.6657	4.62852									901.97	10.025	3.85577	7.90433	8.4827	3.85577	-0.385577	7.51876	7.13318	2.50625	6.36203	6.7476
908.491	9.92464	2.83561	1.82289									902.694	4.27669	8.74777	15.9404	5.63745	5.63745	4.47108	6.99821	5.63745	6.80382	10.8861	5.83184
909.215	6.28564	6.89393	9.12431									903.419	5.85825	11.9118	4.49132	10.3496	11.326	8.78738	5.07715	5.85825	12.3023	12.107	11.1307
909.94	0	-0.406221	8.53065									904.144	6.64032	11.5229	11.1323	10.5464	11.9135	7.22623	8.39805	12.4994	6.05441	11.9135	14.6478
910.664	5.69667	7.32429	13.021									904.868	9.94978	11.9007	20.875	11.1203	12.2909	11.5105	5.65772	12.0958	20.6799	19.1192	20.4848
911.388	6.33119	2.65501	4.4931									905.593	13.7161	14.6958	20.1822	20.1822	15.0877	8.0337	12.3445	10.385	19.5944	19.7903	16.4593
912.112	4.73609	6.38343	9.6781									906.318	14.1715	11.4159	11.6128	15.7461	8.66037	7.87306	11.2191	4.92066	8.26671	16.1398	15.7461
912.836	4.36405	7.68905	6.8578									907.042	4.18543	4.78335	11.3605	14.1508	14.5494	10.7625	4.18543	10.1646	8.96879	7.17503	11.9584
913.56	2.09967	3.7794	9.86844									907.767	8.25084	7.64712	9.25704	12.0744	7.0434	2.21364	7.24464	6.43968	7.24464	8.65332	16.3004
914.284	5.69024	8.85149	0.421499									908.491	3.64579	4.25342	7.29157	9.72209	0.202544	0.810174	1.82289	10.1272	1.01272	8.70937	11.7475
915.008	-0.423113	2.11557	6.55826									909.215	6.08288	5.67735	10.1381	5.88011	4.8663	8.31326	2.43315	-0.202763	10.7464	11.3547	13.9906
915.732	12.7202	9.32813	22.2603									909.94	8.73376	5.07777	7.71821	7.10888	3.8591	6.09332	6.29643	-3.04666	7.5151	1.62489	5.28088
916.456	11.8759	11.2397	14.2086									910.664	2.03452	6.71393	9.76572	-0.406905	-0.81381	5.49322	5.90012	7.73119	8.545	6.51048	4.88286
917.18	15.5481	8.51953	14.4832									911.388	1.42962	-1.42962	1.22539	6.53542	3.06348	10.2116	1.83809	-0.816927	0.204232	4.28887	10.8243
917.903	8.60621	11.4032	14.2002									912.112	7.41302	5.14793	2.05917	10.0899	8.64852	-2.471	0.205917	1.64734	-1.44142	10.0899	4.53018
918.627	5.45341	17.2328	9.37987									912.836	5.61092	8.72811	-1.24687	5.81874	7.48123	6.64999	0.207812	5.40311	5.61092	4.98749	4.77968
919.35	7.26815	5.94667	6.38716									913.56	2.93954	13.6478	5.66911	11.3382	5.45914	3.56944	7.76877	2.93954	3.56944	9.65847	6.71894
920.074	5.97737	13.9472	11.0692									914.284	5.90099	9.06223	7.16549	5.05799	8.42999	10.5375	11.802	4.42574	-1.05375	5.26874	4.21499
920.797	5.55911	3.7802	12.8971									915.008	2.11557	15.2321	7.40448	8.46227	9.09694	8.46227	15.6552	10.5778	13.5396	9.73161	9.09694
921.521	4.01228	6.46423	5.34971									915.732	16.7482	15.0522	12.0842	15.4762	16.1122	15.6882	7.63211	13.1442	12.9322	18.4443	16.5362
922.244	0	2.90792	4.6974									916.456	16.9655	19.7224	15.481	27.3569	15.0569	9.96725	13.7845	15.269	15.0569	18.45	23.9638
922.968	8.57797	6.09487	9.93239									917.18	15.5481	18.53	7.02861	13.4183	15.3352	19.5949	13.6313	11.0754	14.9092	24.2807	15.7611
923.691	1.14144	8.67493	5.93548									917.903	4.08795	10.9729	18.073	13.7699	10.9729	15.276	9.46683	12.0487	10.5426	18.5033	15.7063
924.414	2.08323	1.62029	11.342									918.627	5.45341	9.81614	10.4705	11.5612	15.7058	14.1789	6.10782	11.3431	7.63477	10.2524	13.5245
925.137	-0.234293	-1.17146	5.38873									919.35	10.1314	8.14914	11.0123	13.6553	9.69087	12.7743	12.1136	13.2148	10.7921	3.7442	13.8756
925.86	8.47591	11.7721	8.71136									920.074	9.96228	6.86291	5.31322	7.52706	9.29813	13.0617	3.76353	5.75598	7.52706	6.42014	9.96228
926.583	-0.946507	15.1441	3.78603									920.797	3.55783	13.3419	3.33547	2.44601	5.11438	14.8984	-0.889458	2.22364	7.33803	12.8971	11.7853
927.306	9.76186	8.0952	6.19045									921.521	3.78938	15.3804	3.34357	6.91004	4.23519	3.56647	0.222905	-1.33743	6.24133	3.12066	8.02456
928.029	0.239905	3.83848	3.59857									922.244	2.46055	11.8554	5.14478	2.90792	7.82901	7.38164	3.1316	5.36846	8.50007	7.38164	9.39481
928.752	1.69895	4.36872	4.12602									922.968	9.48091	10.3839	6.09487	8.35223	5.41767	4.06325	8.57797	10.6096	7.22355	2.03162	6.54634
929.475	3.20502	0.49308	7.88929									923.691	8.44664	2.96774	4.56575	12.0992	5.93548	10.9578	1.36973	5.25061	11.4144	5.02233	5.02233
930.198	12.3057	-2.7625	-1.25568									924.414	0.925881	-1.38882	2.54617	3.24058	13.6567	0.694411	9.95322	0.23147	6.94411	2.08323	5.09234
930.92	2.80694	4.08281	5.35869									925.137	2.10863	1.17146	1.64005	12.1832	6.3259	5.15444	12.4175	9.13741	7.26307	8.90312	1.87434
931.643	6.98906	6.2125	6.73021									925.86	1.17721	4.23796	7.2987	8.00503	4.4734	7.53415	3.76707	5.88605	0.235442	5.88605	2.35442
932.366	-3.14323	11.2632	13.8826									926.583	10.4116	9.46507	10.4116	11.8313	7.80868	-5.67904	1.89301	1.18313	8.28193	8.75519	13.2511
933.088	3.45997	6.38763	1.86306									927.306	4.52379	0	-0.952377	9.04758	2.14285	8.33329	6.42854	6.66664	9.76186	2.14285	6.42854
933.811	1.91367	10.6619	5.46762									928.029	2.39905	8.15676	4.79809	5.51781	-5.038	6.47743	-5.99762	4.31829	5.2779	3.11876	5.038
934.533	-1.98666	2.27047	-0.283808									928.752	-0.242707	6.55309	9.70827	8.49474	3.3979	-1.69895	1.69895	1.45624	6.31038	5.33955	0.728121
935.256	11.8396	-3.2559	16.2795									929.475	9.36853	4.68426	1.47924	4.19118	4.43772	4.93081	0.493081	8.38237	5.67043	0.739621	-0.986161
935.978	6.79848	11.1248	-5.25337									930.198	-3.76704	4.52045	-1.75795	4.77159	4.01818	-0.251136	0.251136	1.00455	7.78522	6.52954	7.78522
936.7	0	12.2762	-0.323058									930.92	9.44151	1.53106	5.61387	10.7174	1.53106	1.27588	5.35869	13.014	9.44151	6.63457	7.14492
937.422	18.3353	-3.39542	11.884									931.643	0.776563	10.8719	4.91823	12.9427	4.40052	6.73021	-1.81198	5.69479	3.88281	-0.517708	3.10625
938.145	11.7366	1.77827	6.40177									932.366	5.76258	8.38194	10.2155	4.45291	7.3342	2.09549	0.785807	2.61936	8.90581	12.5729	3.92903
938.867	3.34976	7.81609	8.18829									933.088	6.12148	9.04915	5.85533	-0.266151	-0.798454	7.98454	5.85533	0.532303	-1.06461	6.12148	-3.19382
939.589	6.63825	3.12388	1.56194									933.811	-3.82733	6.28776	3.28057	4.10071	0.820143	6.56114	1.91367	11.2086	9.29495	4.10071	3.28057
940.311	1.22879	-4.91515	17.203									934.533	-0.283809	2.55428	7.94664	4.54094	5.67617	5.67617	7.09521	-4.25713	12.7714	9.36568	5.39236
941.033	-3.4057	14.4742	14.0485									935.256	12.7276	8.58372	-0.887972	5.62382	11.2476	4.43986	7.99174	4.73585	7.10377	2.95991	10.0637
941.755	15.8052	1.3171	9.21969									935.978	16.3782	7.41652	5.56239	-2.16315	10.1977	-0.927065	12.0518	0.927065	0.618043	10.5067	-3.39924
942.476	5.80794	2.68059	2.68059									936.7	1.29223	7.43034	5.16893	-0.969175	11.9532	1.61529	3.8767	5.81505	-0.969175	11.6301	9.69175
943.198	-9.94592	0.452087	12.2064									937.422	1.69771	8.48855	6.4513	6.79084	2.71633	1.01863	0	9.84671	3.73496	5.43267	10.1863
943.92	14.0901	3.18163	11.8175									938.145	16.0044	11.3809	7.11308	9.247	15.6488	17.427	8.89135	2.13392	4.6235	12.4479	11.0253
944.642	5.90903	4.54541	8.63627									938.867	0	-1.11658	1.86098	7.0717	19.7263	12.6546	6.32731	-3.34976	8.56048	6.32731	10.0493
945.363	7.27356	-0.909195	17.2747									939.589	7.41922	17.5718	0.780971	13.667	0.780971	-4.29534	8.20019	8.59068	11.7146	-1.56194	-2.34291
946.085	2.71568	5.43136	12.6732									940.311	-6.14394	15.5646	7.37273	10.2399	-1.22879	11.4687	18.0222	18.4318	5.73434	-2.86717	9.01111
946.806	-1.79047	-5.81902	18.7999									941.033	5.10855	4.25713	5.53426	12.3457	2.12856	9.36568	-1.27714	5.10855	10.6428	16.1771	8.08854
947.528	3.95059	5.26745	22.3867									941.755	25.0249	21.5126	9.65873	14.0491	3.51226	-3.51226	3.51226	-5.2684	-0.878066	2.6342	8.34163
948.249	6.88236	3.44118	9.89339									942.476	6.70147	10.7224	-1.78706	16.0835	2.68059	14.7432	-5.80794	0.89353	9.38206	5.36118	19.2109
948.971	3.36622	5.4701	-0.420777									943.198	3.6167	9.94592	14.9189	8.58966	12.6584	13.5626	5.87714	7.2334	4.52087	9.49383	3.16461
949.692	12.4019	-4.13396	10.3349									943.92	0	14.9991	16.3627	9.99943	9.99943	23.635	-8.63587	-1.36356	1.81808	15.4537	22.2714
950.413	6.92779	8.55785	3.26013									944.642	25.9088	9.54536	14.5453	-1.36362	4.54541	4.99995	4.99995	0.909081	-4.99995	4.54541	14.0908
951.134	12.0469	8.43284	14.4563									945.363	-0.454598	6.81897	11.8195	19.5477	0	13.1833	-6.36437	0.909195	10.9103	13.6379	7.72816
951.855	7.08796	5.51286	5.90663									946.085	3.16829	-1.35784	-3.62091	11.7679	11.7679	8.14704	7.24181	0.452613	8.59965	4.52613	11.3153
952.576	1.1586	7.72402	8.88262									946.806	19.6952	-11.1904	5.81902	13.4285	-5.81902	13.8761	-4.47617	4.02855	3.13332	4.02855	5.81902
953.297	6.38875	17.663	10.5227									947.528	7.90118	1.75582	-2.19477	9.657	7.46223	0	0.438955	2.63373	5.70641	-0.438955	13.6076
954.018	2.58316	-1.47609	16.9751									948.249	5.16177	8.1728	7.3125	-12.9044	3.01103	10.3235	-3.44118	10.7537	24.9485	-1.29044	21.5074
954.739	6.19713	7.65528	15.6751									948.971	6.73243	-1.26233	10.9402	8.41554	17.6726	-1.68311	5.04932	13.0441	1.26233	2.94544	20.6181
955.46	3.97375	-3.97375	7.22499									949.692	5.37415	8.68132	9.09471	11.5751	12.4019	2.48038	24.8038	20.6698	11.1617	8.26792	9.09471
956.181	7.506	0	1.42971									950.413	8.15034	5.29772	2.85262	-0.407517	2.4451	12.2255	22.8209	4.8902	17.1157	16.7082	14.2631
956.902	3.87418	3.87418	11.6225									951.134	13.2516	9.23597	9.63753	3.21251	6.42502	-2.81095	9.23597	0.401564	2.81095	16.4641	16.8657
												951.855	9.84439	10.2382	-2.36265	12.9946	4.33153	12.207	3.15021	0	11.0257	-2.36265	-1.5751
												952.576	8.88262	2.70341	3.86201	11.1998	13.1308	3.08961	12.3584	1.93101	8.49642	5.40681	10.4274
												953.297	7.89199	12.7775	16.9114	19.5421	11.2743	3.75809	12.7775	4.50971	6.38875	7.14037	4.1339
												954.018	3.32121	22.1414	2.95219	6.64242	7.74949	6.64242	7.74949	11.4397	1.47609	-3.32121	14.7609
												954.739	10.9361	0.729074	6.19713	0.364537	1.09361	5.83259	18.5914	-8.74889	17.1332	2.9163	7.65528
												955.46	5.05749	2.89	7.58624	5.77999	10.4762	7.94749	1.445	0	3.6125	5.05749	14.45
												956.181	9.29314	10.008	0	3.57429	18.2289	5.36143	-0.357428	10.3654	1.07228	5.71885	7.86343
												956.902	7.04396	12.3269	9.15714	-0.352198	2.46538	0.352198	3.16978	2.11319	9.15714	22.5407	1.05659

## Sheet: Reproducibility_PLQY_100%_7% Sr
QUA												QUA												QUA												QUA
4												4												4												4
5	1024	1	1	0	1	256	284	563	950			5	1024	1	1	0	1	256	284	551	914			6	1024	1	1	0	1	256	284	523	985			7	1024	1	1	0	1	256	284	518	992
389.84nm	410.98nm	619.95nm	904.14nm									389.84nm	410.98nm	611.02nm	878.02nm									389.84nm	410.98nm	590.18nm	929.47nm									389.84nm	410.98nm	586.45nm	934.53nm
First time												Second time												Third time												Fourth time
N o.	Cursor1-2: 389.84 - 410.98(nm)	Cursor3-4: 619.95 - 904.14(nm)	QuantumYield	Abs	Peak Wavelength	Peak Count	Peak FWHM	Peak Wavelength	Peak Count	Peak FWHM		N o.	Cursor1-2: 389.84 - 410.98(nm)	Cursor3-4: 611.02 - 878.02(nm)	QuantumYield	Abs	Peak Wavelength	Peak Count	Peak FWHM	Peak Wavelength	Peak Count	Peak FWHM		N o.	Cursor1-2: 389.84 - 410.98(nm)	Cursor3-4: 590.18 - 929.47(nm)	QuantumYield	Abs	Peak Wavelength	Peak Count	Peak FWHM	Peak Wavelength	Peak Count	Peak FWHM		N o.	Cursor1-2: 389.84 - 410.98(nm)	Cursor3-4: 586.45 - 934.53(nm)	QuantumYield	Abs	Peak Wavelength	Peak Count	Peak FWHM	Peak Wavelength	Peak Count	Peak FWHM
1	134039266	---	---	---	400.41	47091.8	6.77	882.38	30.15	4.77		1	127246245	---	---	---	400.41	44646.4	6.78	824.11	21.44	3.36		1	127889057	---	---	---	400.41	44908.8	6.77	883.83	26.04	4.24		1	118914723	---	---	---	400.41	41768.3	6.78	882.38	24.33	5.14
2	84224477	12256501	0.246	0.372	400.41	29634.5	6.76	739.79	253.08	60.51		2	81071493	21782290	0.472	0.363	400.41	28496.5	6.77	747.14	447.75	61.47		2	72384166	32755713	0.59	0.434	400.41	25459.2	6.77	750.09	654.1	62.38		2	66048294	34319147	0.649	0.445	400.41	23278	6.76	750.09	682.95	63.05
3	35750536	53486955	0.544	0.733	400.41	12585	6.77	752.29	1054.33	63.34		3	43019713	40463946	0.48	0.662	400.41	15146.8	6.77	750.82	817.14	62.7		3	47546975	52356629	0.652	0.628	400.41	16738.7	6.77	749.35	1036.09	62.8		3	47960957	48708288	0.686	0.597	400.41	16870.4	6.77	750.09	974	62.09
4	27519687	98356044	0.923	0.795	400.41	9700.64	6.76	755.23	1904.25	64.52		4	32364210	93643001	0.987	0.746	400.41	11386.5	6.76	754.5	1856.02	63.63		4	36892482	68661246	0.755	0.712	400.41	12967.9	6.77	752.29	1350.02	63.35		4	34734280	65040699	0.773	0.708	400.41	12202.2	6.78	751.56	1284.46	63.02
5	24408177	116459834	1.062	0.818	400.41	8595.25	6.76	754.5	2220.13	65.57		5	26402530	113816092	1.129	0.793	400.41	9330	6.75	755.23	2228.31	64.3		5	28069183	95714345	0.959	0.781	400.41	9892.5	6.76	753.03	1878.69	63.32		5	26234815	77634504	0.838	0.779	400.41	9253.68	6.76	753.03	1533.47	63.15
																								6	22924476	114987273	1.095	0.821	400.41	8079.51	6.76	755.23	2255.65	63.17		6	21588715	87799519	0.902	0.818	400.41	7603.59	6.77	751.56	1732.14	63.13
																																				7	15903578	105811037	1.027	0.866	400.41	5601.66	6.76	753.76	2087.67	63.14
Wavelength	1	2(QY=0.246041)	3(QY=0.544182)	4(QY=0.923361)	5(QY=1.062288)							Wavelength	1	2(QY=0.471736)	3(QY=0.480418)	4(QY=0.986941)	5(QY=1.128638)
195.445	717.102	175.292	637.424	79.678	-47.8068							195.445	685.23	95.6136	270.905	414.325	31.8712							Wavelength	1	2(QY=0.590141)	3(QY=0.651671)	4(QY=0.754548)	5(QY=0.958871)	6(QY=1.095486)
196.208	301.241	516.413	-129.103	-71.724	415.999							196.208	229.517	215.172	243.862	157.793	243.862							195.445	15.9356	223.098	15.9356	-223.098	-366.519	191.227						Wavelength	1	2(QY=0.649167)	3(QY=0.686479)	4(QY=0.772634)	5(QY=0.837663)	6(QY=0.902118)	7(QY=1.027180)
196.972	404.97	274.335	-431.097	117.572	-104.508							196.972	261.271	-52.2542	-261.271	-91.4449	-117.572							196.208	129.103	-14.3448	-243.862	157.793	487.723	487.723						195.445	334.647	127.485	143.42	-31.8712	-191.227	191.227	350.583
197.735	420.596	120.17	180.255	144.204	-84.1192							197.735	504.715	0	-96.1362	-444.63	60.0851							196.972	-13.0636	509.479	143.699	248.208	300.462	26.1271						196.208	-401.654	-286.896	-502.068	14.3448	430.344	215.172	301.241
198.498	344.102	55.5003	-33.3002	122.101	177.601							198.498	-199.801	410.702	188.701	188.701	-144.301							197.735	-60.0851	-36.0511	84.1192	192.272	300.426	252.358						196.972	130.636	-39.1907	104.508	-391.907	-117.572	39.1907	130.636
199.261	-101.753	111.929	40.7013	71.2273	111.929							199.261	254.383	-132.279	315.435	254.383	213.682							198.498	-99.9005	133.201	144.301	355.202	266.401	444.002						197.735	264.375	-180.255	240.341	48.0681	108.153	228.324	276.392
200.024	93.4725	224.334	205.639	-56.0835	-46.7362							200.024	364.543	-149.556	130.861	-65.4307	261.723							199.261	183.156	335.786	-417.188	142.455	356.136	407.013						198.498	155.401	-22.2001	55.5003	-44.4002	-11.1001	0	-77.7004
200.787	-51.5589	-25.7795	223.422	-197.643	77.3384							200.787	-42.9658	206.236	300.76	-77.3384	266.388							200.024	280.417	-130.861	121.514	168.25	-56.0835	177.598						199.261	132.279	30.526	152.63	-101.753	10.1753	132.279	91.5779
201.55	134.077	-189.285	189.285	47.3213	31.5475							201.55	157.738	165.625	-31.5475	197.172	39.4344							200.787	60.1521	25.7795	77.3384	128.897	-42.9658	0						200.024	102.82	-168.25	299.112	392.584	-18.6945	243.028	74.778
202.313	-21.6942	180.785	260.331	21.6942	231.405							202.313	28.9257	122.934	101.24	-137.397	115.703							201.55	63.0951	-228.72	126.19	299.702	134.077	55.2082						200.787	214.829	77.3384	8.59316	-206.236	103.118	223.422	-85.9316
203.076	165.918	6.63671	-92.9139	126.097	92.9139							203.076	46.4569	132.734	92.9139	-132.734	-39.8202							202.313	108.471	-122.934	43.3885	101.24	122.934	130.165						201.55	228.72	-78.8689	149.851	70.982	70.982	276.041	55.2082
203.839	237.559	341.11	54.8212	0	274.106							203.839	176.646	18.2737	158.372	67.0037	140.099							203.076	331.835	0	245.558	139.371	-13.2734	0						202.313	-57.8513	-28.9257	0	202.48	-7.23142	-130.165	65.0827
204.602	-39.1932	5.59903	72.7874	167.971	223.961							204.602	55.9903	-67.1884	83.9855	95.1835	111.981							203.839	213.194	-54.8212	115.734	36.5475	24.365	67.0037						203.076	205.738	86.2772	73.0038	172.554	39.8202	106.187	199.101
205.364	118.655	211.516	-41.2713	170.244	20.6357							205.364	350.806	-20.6357	170.244	67.0659	20.6357							204.602	33.5942	89.5845	-27.9952	50.3913	156.773	-5.59903						203.839	207.102	164.464	6.09125	255.832	97.46	-121.825	-60.9125
206.127	-9.53391	147.776	-23.8348	95.3391	0							206.127	204.979	162.077	-33.3687	195.445	85.8052							205.364	77.3838	98.0194	-46.4303	67.0659	-15.4767	123.814						204.602	123.179	83.9855	-201.565	61.5894	11.1981	11.1981	5.59903
206.89	17.6464	-4.41159	26.4696	0	57.3507							206.89	13.2348	167.641	-110.29	-119.113	-26.4696							206.127	52.4365	23.8348	109.64	190.678	138.242	-4.76696						205.364	77.3838	15.4767	20.6357	20.6357	92.8605	-113.496	82.5427
207.653	127.027	147.516	94.2461	110.637	53.2695							207.653	188.492	81.9531	69.6602	-57.3672	172.102							206.89	-52.9391	83.8203	-4.41159	26.4696	-22.058	66.1739						206.127	23.8348	23.8348	190.678	119.174	42.9026	28.6017	147.776
208.415	95.3728	45.779	-49.5939	30.5193	-80.1132							208.415	26.7044	41.964	-7.62983	91.5579	68.6684							207.653	73.7578	-24.5859	-45.0742	-16.3906	-77.8555	40.9766						206.89	74.9971	8.82319	22.058	83.8203	44.1159	0	74.9971
209.178	164	82.0002	39.2175	60.6088	-7.13045							209.178	39.2175	82.0002	124.783	-60.6088	64.174							208.415	87.743	0	34.3342	103.003	129.707	-99.1877						207.653	16.3906	-40.9766	65.5625	20.4883	16.3906	12.293	-16.3906
209.941	110.297	63.5044	-33.4234	36.7657	40.1081							209.941	80.2161	33.4234	53.4774	-6.68468	36.7657							209.178	42.7827	0	-21.3913	74.8697	71.3045	35.6522						208.415	15.2597	19.0746	156.411	7.62983	30.5193	-53.4088	-80.1132
210.704	53.4838	40.8994	-141.575	59.776	28.3149							210.704	106.968	3.1461	31.4611	72.3604	119.552							209.941	106.955	127.009	-6.68468	86.9008	56.8198	53.4774						209.178	92.6958	60.6088	14.2609	-82.0002	14.2609	3.56522	67.7393
211.466	130.65	50.4783	50.4783	-97.9873	-32.6624							211.466	118.772	0	38.6011	71.2635	89.0793							210.704	78.6526	84.9448	15.7305	-6.29221	97.5293	78.6526						209.941	140.378	-3.34234	100.27	-86.9008	16.7117	33.4234	-13.3694
212.229	64.6796	89.9891	22.4973	36.5581	50.6188							212.229	14.0608	61.8675	16.8729	-8.43647	81.5526							211.466	47.509	-29.6931	-47.509	32.6624	-130.65	23.7545						210.704	-44.0455	3.1461	69.2143	31.4611	34.6072	0	-44.0455
212.991	152.145	80.0762	-2.66921	16.0152	56.0533							212.991	69.3994	-29.3613	29.3613	61.3917	32.0305							212.229	-44.9945	53.431	-47.8067	42.1824	56.2432	67.4918						211.466	-14.8466	-20.7852	118.772	77.2021	118.772	56.4169	11.8772
213.754	-40.6315	0	20.3157	-15.2368	-12.6973							213.754	86.3419	66.0262	-63.4867	60.9472	43.171							212.991	2.66921	82.7454	-77.407	90.753	26.6921	98.7606						212.229	-25.3094	53.431	98.4255	-47.8067	-28.1216	78.7404	-87.1769
214.516	72.5515	31.439	-33.8574	7.25515	-31.439							214.516	89.4802	31.439	24.1838	0	48.3677							213.754	-10.1579	5.07894	7.61841	104.118	45.7104	50.7894						212.991	72.0686	-10.6768	69.3994	32.0305	58.7225	-61.3917	8.00762
215.279	50.7394	-9.22535	46.1268	-34.5951	-29.9824							215.279	136.074	11.5317	57.6585	29.9824	57.6585							214.516	45.9493	7.25515	24.1838	45.9493	-16.9287	12.0919						213.754	20.3157	-40.6315	109.197	60.9472	33.0131	53.3288	2.53947
216.041	-24.2265	85.8941	-2.20241	2.20241	105.716							216.041	2.20241	-2.20241	39.6434	-2.20241	-11.0121							215.279	18.4507	32.2887	-46.1268	-27.6761	73.8028	-36.9014						214.516	74.9699	43.5309	-29.0206	65.2963	9.67353	21.7654	4.83677
216.804	79.9979	29.4729	44.2094	-2.10521	79.9979							216.804	12.6312	8.42083	-54.7354	88.4187	21.0521							216.041	41.8458	17.6193	-26.4289	48.4531	15.4169	41.8458						215.279	48.4331	66.8838	-20.757	50.7394	59.9648	20.757	94.5599
217.566	26.1739	-10.0669	-16.107	-24.1605	2.01338							217.566	148.99	-4.02676	36.2408	62.4147	20.1338							216.804	-14.7364	-8.42083	105.26	54.7354	44.2094	21.0521						216.041	70.4772	30.8338	6.60724	72.6796	15.4169	41.8458	35.2386
218.328	-7.71169	63.6215	19.2792	44.3422	1.92792							218.328	11.5675	46.2702	21.2072	3.85585	38.5585							217.566	48.3211	-4.02676	60.4013	4.02676	18.1204	42.2809						216.804	25.2625	65.2614	50.525	35.7885	2.10521	23.1573	101.05
219.091	77.6064	46.1943	29.5643	64.672	51.7376							219.091	35.1076	40.651	9.23885	33.2599	-12.9344							218.328	36.6305	90.6124	15.4234	9.63961	25.063	3.85585						217.566	130.87	50.3344	-2.01338	68.4548	50.3344	38.2542	-4.02676
219.853	63.762	19.4828	-17.7117	-19.4828	-3.54233							219.853	58.4485	-14.1693	-12.3982	8.85583	8.85583							219.091	29.5643	24.021	0	31.4121	16.6299	33.2599						218.328	50.126	21.2072	57.8377	11.5675	50.126	-28.9188	38.5585
220.615	61.114	69.602	5.09283	5.09283	54.3235							220.615	25.4642	57.7187	6.79044	6.79044	59.4164							219.853	21.254	-1.77117	42.508	67.3043	17.7117	35.4233						219.091	31.4121	12.9344	-35.1076	5.54331	72.0631	25.8688	35.1076
221.378	21.155	11.3911	35.8007	26.0369	-30.9188							221.378	19.5277	55.3284	-17.9004	-47.1919	9.76384							220.615	79.7877	-1.69761	3.39522	52.6259	10.1857	0						219.853	-24.7963	21.254	26.5675	-24.7963	26.5675	-37.1945	33.6522
222.14	26.5016	34.2961	-12.4713	-29.6194	0							222.14	74.8279	23.3837	3.11783	-20.2659	23.3837							221.378	3.25461	-32.5461	-22.7823	-3.25461	47.1919	6.50922						220.615	45.8355	-11.8833	-8.48805	3.39522	-40.7426	6.79044	32.2546
222.902	14.9211	11.9369	32.8264	8.95265	14.9211							222.902	31.3343	34.3185	-4.47633	-20.8895	35.8106							222.14	14.0302	-14.0302	42.0907	4.67675	71.7101	4.67675						221.378	37.428	16.2731	3.25461	1.62731	-39.0553	30.9188	9.76384
223.664	12.8361	21.3935	35.6558	18.541	25.6721							223.664	1.42623	35.6558	1.42623	55.623	-9.98361							222.902	29.8422	16.4132	10.4448	55.208	-13.429	16.4132						222.14	14.0302	1.55892	14.0302	-7.79458	23.3837	-31.1783	18.707
224.426	12.2464	9.52501	23.1322	-10.8857	-2.72143							224.426	20.4107	38.1	2.72143	-35.3786	32.6572							223.664	-8.55738	39.9344	-8.55738	57.0492	0	57.0492						222.902	20.8895	5.96844	40.2869	-7.46054	17.9053	-40.2869	40.2869
225.189	12.9486	-9.06401	9.06401	-14.2434	10.3589							225.189	-27.192	14.2434	0	9.06401	12.9486							224.426	-9.52501	0	-13.6072	28.575	-1.36071	20.4107						223.664	15.6885	-9.98361	38.5082	-5.70492	19.9672	11.4098	12.8361
225.951	22.1241	19.6659	33.1862	25.8115	9.83295							225.951	38.1027	67.6016	2.45824	-11.0621	28.2697							225.189	-14.2434	42.7303	-1.29486	5.17943	14.2434	28.4869						224.426	44.9036	20.4107	35.3786	35.3786	-20.4107	27.2143	-14.9679
226.713	46.5473	2.32736	-17.4552	10.4731	-2.32737							226.713	44.2199	-5.81841	-11.6368	36.0742	0							225.951	-43.0192	-8.60383	9.83295	-9.83295	12.2912	20.895						225.189	18.128	7.76915	51.7943	2.58972	-6.47429	50.4995	16.8332
227.475	19.7916	12.0949	28.5879	-7.69674	21.9907							227.475	41.7823	15.3935	27.4884	-7.69674	-24.1898							226.713	-17.4552	-2.32736	5.81841	-12.8005	-27.9284	22.11						225.951	34.4153	3.68736	23.3533	-13.5203	-6.1456	19.6659	14.7494
228.237	39.4498	17.6486	42.5643	-6.22892	11.4197							228.237	24.9157	-19.7249	-12.4578	12.4578	30.1064							227.475	15.3935	12.0949	-19.7916	7.69674	-12.0949	34.0856						226.713	-1.16368	-8.14578	32.5831	36.0742	58.1841	45.3836	1.16368
228.999	9.80067	5.8804	1.96013	4.90033	-4.90033							228.999	24.5017	13.7209	6.86047	-3.92027	24.5017							228.237	5.19076	9.34338	20.7631	24.9157	4.15261	15.5723						227.475	-9.89581	24.1898	4.39814	69.2707	4.39814	60.4744	28.5879
229.761	11.1124	-5.55621	3.70414	23.1509	6.48224							229.761	25.0029	32.4112	-1.85207	-6.48224	23.1509							228.999	-3.92027	16.6611	27.4419	18.6213	13.7209	-3.92027						228.237	-7.26707	-5.19076	-1.03815	40.488	-7.26707	20.7631	-13.496
230.522	-2.62884	38.5564	0.876281	5.25769	12.2679							230.522	17.5256	31.5461	0	5.25769	7.01025							229.761	12.9645	14.8166	4.63018	-0.926035	-1.85207	-12.9645						228.999	19.6013	51.9435	-1.96013	-7.84053	3.92027	-14.701	9.80067
231.284	9.14035	-2.49282	10.8022	3.32376	16.6188							231.284	34.8995	19.1116	11.6332	19.9426	39.0542							230.522	-6.13397	-21.0307	17.5256	15.7731	19.2782	-1.75256						229.761	6.48224	14.8166	-11.1124	22.2248	-6.48224	-11.1124	-2.77811
232.046	7.89642	15.0032	9.47571	35.5339	19.7411							232.046	13.4239	11.8446	22.8996	6.31714	7.89642							231.284	-22.4354	8.30941	7.47847	37.3923	19.9426	23.2663						230.522	-3.50512	-9.63909	-10.5154	-3.50512	12.2679	-16.6493	-2.62884
232.808	6.7706	18.8072	9.77975	2.25686	-14.2935							232.808	18.8072	-1.50458	18.0549	15.7981	-13.5412							232.046	1.57929	19.7411	12.6343	13.4239	-6.31714	-0.789642						231.284	18.2807	-4.98565	-14.9569	2.49282	0	38.2233	7.47847
233.57	-16.5172	-12.9265	-10.0539	0.718139	20.826							233.57	32.3162	9.3358	-2.87255	15.0809	-0.718139							232.808	9.02746	16.5503	3.76144	28.587	26.3301	0.752288						232.046	18.9514	28.4271	19.7411	6.31714	9.47571	19.7411	0.789642
234.332	13.7396	26.7922	18.5484	23.3573	6.86979							234.332	-1.37396	-2.06094	8.24375	0.686979	28.1661							233.57	27.2893	0.718139	19.3897	8.61766	-2.15442	5.02697						232.808	5.26602	-2.25686	9.77975	-4.51373	7.52288	24.0732	10.532
235.093	25.0192	-2.6336	3.292	17.7768	13.168							235.093	0.658401	23.7024	4.6088	5.2672	9.87601							234.332	1.37396	21.2964	2.74792	20.6094	-24.7313	-10.3047						233.57	-22.2623	18.6716	6.46325	12.9265	6.46325	5.74511	-11.4902
235.855	5.05644	1.26411	4.42439	4.42439	-1.26411							235.855	14.5373	18.3296	0	21.4899	4.42439							235.093	3.292	26.336	5.2672	22.3856	-6.58401	-0.658401						234.332	10.3047	-2.06094	-7.55677	6.86979	6.18281	-17.8615	-10.3047
236.617	34.0299	9.72284	-2.43071	-36.4606	13.9766							236.617	10.3305	4.86142	12.1535	27.9532	2.43071							235.855	15.8014	27.8104	0	21.4899	10.1129	20.8578						235.093	10.5344	11.8512	18.4352	-5.2672	25.0192	11.1928	8.55921
237.378	0	-7.02554	12.2947	-7.611	-2.92731							237.378	25.7603	3.51277	-17.5638	9.36738	12.2947							236.617	7.29213	-15.7996	23.6994	-0.607677	7.8998	26.7378						235.855	10.7449	5.6885	12.6411	-5.05644	4.42439	5.6885	10.7449
238.14	18.6521	-10.1739	15.2608	-10.7391	17.5217							238.14	16.9565	24.3043	4.52172	-9.60866	6.21737							237.378	8.78192	11.1238	-17.5638	12.8802	8.78192	13.4656						236.617	17.015	4.86142	10.3305	21.2687	13.9766	-3.64606	5.4691
238.902	8.19896	19.6775	13.6649	6.55917	8.19896							238.902	-9.29215	0	1.63979	20.2241	-9.83875							238.14	-1.13043	8.47823	17.5217	9.04345	10.1739	1.13043						237.378	14.0511	22.2475	15.8075	16.9784	5.85461	-19.9057	14.6365
239.663	4.237	-1.58888	16.948	3.17775	5.29625							239.663	15.8887	9.00362	14.2999	12.1814	8.474							238.902	3.27958	20.7707	4.37278	10.9319	3.82618	1.63979						238.14	20.913	-1.69565	7.91302	0.565215	-0.565216	-3.39129	6.21737
240.425	13.8815	12.3391	6.16957	4.62718	-2.05653							240.425	23.1359	33.4185	-5.65544	4.62718	15.9381							239.663	12.711	7.94437	3.17775	2.64812	10.5925	5.29625						238.902	21.8639	9.29215	23.5037	11.4785	10.3853	12.0251	-5.46597
241.186	14.4922	-0.49973	-5.49703	0.999461	9.99461							241.186	16.9908	11.9935	23.4873	10.9941	11.4938							240.425	16.4522	18.5087	-4.11305	-7.19784	-3.08479	23.1359						239.663	8.474	0	5.29625	-6.88512	9.00362	11.6517	-10.5925
241.948	12.6456	-9.7274	-0.97274	-9.24103	3.89096							241.948	12.6456	11.6729	1.45911	10.7001	-4.8637							241.186	27.4852	3.99784	10.4943	-6.99622	25.986	19.4895						240.425	5.14131	11.3109	-10.2826	27.7631	0	5.65544	6.68371
242.709	15.1704	9.00743	-2.84445	3.7926	-2.37038							242.709	1.42223	2.84445	-7.11113	-4.74075	4.26668							241.948	9.7274	13.6184	10.7001	9.7274	5.35007	8.75466						241.186	34.4814	7.49596	28.4846	8.49542	12.4933	11.9935	10.4943
243.471	24.0494	26.3618	6.93731	1.84995	-6.01234							243.471	17.5745	1.38746	14.7996	-11.0997	7.3998							242.709	2.37038	9.48151	13.7482	-17.5408	3.31853	10.4297						241.948	12.1592	18.9684	8.26829	17.0229	4.8637	-4.37733	1.94548
244.232	10.8408	2.71021	3.61361	14.4545	13.0994							244.232	2.25851	-18.5198	6.32382	2.25851	1.35511							243.471	5.08736	0.924975	3.23741	9.24975	18.962	0						242.709	10.9037	26.0741	4.26668	5.21483	15.6445	0.474075	-12.326
244.993	11.9243	6.18295	5.29967	-6.18295	5.29967							244.993	8.39114	1.32492	-8.39114	-5.29967	8.39114							244.232	4.06532	7.67893	10.8408	9.03403	-2.71021	-1.35511						243.471	-1.38746	2.77493	-10.1747	23.5869	1.84995	6.93731	10.1747
245.755	6.05008	6.48223	8.21082	-6.05008	8.21082							245.755	23.336	6.48223	2.59289	12.9645	6.48223							244.993	16.7823	2.20819	1.32492	7.9495	-2.64983	-4.41639						244.232	-6.77553	-11.2925	2.25851	5.42042	4.51702	-12.1959	13.5511
246.516	14.8085	10.1544	5.92341	-3.3848	-1.6924							246.516	20.7319	2.9617	-0.4231	10.5775	-1.2693							245.755	16.8538	3.45719	-4.75363	-3.88934	0	5.61793						244.993	0.441639	8.83278	-5.29967	9.27442	27.3816	7.50786	5.29967
247.277	15.7539	6.21865	-0.414577	-6.21865	-8.70611							247.277	16.5831	1.24373	-1.65831	-0.414577	5.80407							246.516	8.03891	8.03891	2.1155	9.73131	-0.4231	-2.9617						245.755	-18.5824	-0.864297	-15.5573	-3.02504	-0.864297	-6.48223	2.16074
248.038	13.4086	15.4402	5.6885	4.46954	0							248.038	0.812643	2.03161	10.158	11.7833	-4.87586							247.277	7.0478	4.97492	-8.70611	14.0956	2.48746	10.3644						246.516	-13.1161	4.231	8.46201	-3.8079	6.76961	-5.07721	3.8079
248.8	5.57791	7.1716	4.78107	3.5858	7.1716							248.8	4.38265	7.1716	15.9369	1.19527	1.19527							248.038	10.9707	7.31379	7.72011	4.06321	17.0655	8.53275						247.277	6.21865	3.73119	-7.0478	5.3895	-1.65831	-5.3895	-7.87696
249.561	8.59897	-3.1269	4.29948	-7.42638	4.29948							249.561	8.59897	12.8984	7.03552	3.90862	6.25379							248.8	7.57003	3.98422	4.78107	4.78107	-12.7495	-4.78107						248.038	6.90747	5.28218	15.0339	-4.87586	2.43793	0	21.535
250.322	3.83669	-6.90605	-3.06935	5.75504	-9.9754							250.322	-1.91835	-0.767339	0.383669	-1.15101	11.8937							249.561	7.81724	10.1624	7.81724	6.64466	2.34517	1.56345						248.8	13.1479	-2.39053	24.7022	2.39053	-8.76529	8.36687	-0.398422
251.083	3.39104	11.3035	-6.02851	-9.41955	1.50713							251.083	11.6802	-1.13035	3.01426	11.6802	7.91242							250.322	7.67339	4.9877	-0.767339	13.8121	6.52238	13.0448						249.561	-1.56345	5.47207	14.071	4.69034	2.73604	7.03552	3.51776
251.844	17.4088	9.26	-1.852	1.1112	-6.6672							251.844	2.9632	20.372	0.3704	10.7416	11.8528							251.083	7.53564	8.28921	8.28921	5.27495	6.78208	6.4053						250.322	9.9754	-6.13871	-3.83669	7.67339	-6.90605	-1.53468	1.15101
252.605	-4.00941	5.83187	10.5703	-2.18695	-0.364492							252.605	17.8601	3.28043	-9.1123	-0.364492	1.09348							251.844	1.852	-5.1856	4.4448	0.3704	0.3704	5.1856						251.083	-7.15886	2.26069	21.8534	12.8106	-3.39104	3.01426	-1.88391
253.366	9.69287	4.30794	1.07699	-2.51297	4.30794							253.366	7.5389	1.07699	-2.15397	0.717991	3.23096							252.605	13.8507	-2.18695	10.2058	1.45797	7.65433	-0.728984						251.844	14.4456	9.26	4.4448	6.2968	-2.9632	7.408	-9.26
254.127	4.60187	1.76995	9.55773	-3.5399	7.78778							254.127	10.6197	8.49577	-15.9296	4.24788	-11.3277							253.366	-10.4109	1.07699	7.5389	7.17991	14.0008	2.87196						252.605	4.00941	-0.728984	8.38331	0	13.1217	14.9442	8.01882
254.888	-4.54342	5.94139	-5.24241	0	10.1353							254.888	11.1838	7.33937	8.03836	4.19393	1.39797							254.127	-0.70798	2.12394	-4.95586	10.6197	1.41596	3.5399						253.366	3.23096	-8.25689	3.23096	11.4879	10.0519	-3.94895	7.8979
255.649	16.238	17.9654	4.83684	12.4376	2.07293							255.649	-5.8733	3.80037	-5.52782	0	13.8195							254.888	-0.349494	5.24241	-1.04848	10.1353	5.94139	-4.19393						254.127	13.0976	10.2657	1.41596	7.78778	11.3277	2.12394	-5.30985
256.41	2.73479	-2.0511	-1.70925	4.10219	0.683698							256.41	10.5973	12.9903	-0.341849	-1.3674	5.46959							255.649	13.8195	-4.83684	8.9827	7.60075	5.52782	2.76391						254.888	11.1838	9.08684	-7.33937	12.2323	-10.4848	-0.698988	4.89291
257.171	12.8695	-1.01601	-0.677343	-1.35469	3.04805							257.171	17.6109	12.5309	1.69336	2.03203	-2.3707							256.41	10.5973	4.44404	5.81144	6.83698	3.76034	4.78589						255.649	12.4376	4.49135	-4.49135	6.56428	5.18233	4.49135	8.9827
257.932	5.37312	10.4104	7.38804	3.3582	-3.3582							257.932	7.72386	19.8134	5.70894	-3.3582	10.0746							257.171	6.09609	-1.69336	0.677343	4.7414	1.35469	1.69336						256.41	-1.70925	4.44404	2.39294	13.674	6.49514	-0.683698	14.6995
258.693	2.66634	8.33231	0.999877	6.66585	1.66646							258.693	-1.66646	4.99938	5.33268	14.9982	8.33231							257.932	7.72386	10.4104	-3.3582	8.73132	4.70148	-0.33582						257.171	12.1922	-0.338672	2.3707	3.38672	0.677343	6.43476	6.77343
259.454	8.93418	8.93418	1.98537	4.63254	2.31627							259.454	12.574	5.29433	-1.32358	6.61791	-0.330896							258.693	-4.3328	7.66572	-4.66609	6.33255	-8.33231	-1.66646						257.932	8.3955	-0.33582	-9.40296	4.02984	-2.68656	2.01492	4.70148
260.214	4.27294	-5.58769	8.21719	8.87456	11.8328							260.214	1.64344	0.328688	1.97212	5.259	0.986063							259.454	9.92687	16.2139	5.62523	-1.32358	-0.661791	9.59597						258.693	3.33292	7.33243	-5.66597	0.666585	3.99951	0.333292	6.33255
260.975	1.95967	2.28628	3.91934	-4.24595	11.4314							260.975	3.26611	0	3.26611	12.0846	3.26611							260.214	4.27294	5.91638	-2.95819	7.8885	3.94425	5.259						259.454	6.28702	9.26508	6.94881	-0.330896	-5.62523	5.62523	9.26508
261.736	-2.92218	4.54561	5.84435	4.87029	11.0393							261.736	7.79247	3.89623	2.59749	0.324686	-1.62343							260.975	1.63306	5.87901	-1.63306	9.47173	2.61289	3.59273						260.214	4.93031	-1.97212	13.4762	-0.328688	0.657375	2.30081	4.93031
262.496	11.3013	8.71817	11.6242	-9.68685	1.29158							262.496	0.64579	5.81211	0.64579	7.42659	-1.61448							261.736	7.46778	10.7146	7.79247	7.79247	-1.94812	0.974058						260.975	-3.26611	-3.26611	6.20562	-2.28628	-1.95967	-5.55239	4.24595
263.257	9.96077	13.4952	4.49841	1.28526	5.78367							263.257	2.57052	0.321315	-7.71157	-0.642631	1.92789							262.496	-5.16632	17.7592	-6.4579	7.42659	3.22895	1.29158						261.736	5.19498	12.0134	2.92218	-2.92218	-12.3381	5.84435	-0.324686
264.018	17.2776	6.3991	-2.55964	14.7179	-17.9175							264.018	6.71905	7.35896	-2.23969	-3.5195	3.19955							263.257	0.64263	-5.46236	8.67551	8.03288	2.89184	-4.49841						262.496	0	0.64579	9.36396	9.36396	-2.26026	-1.93737	-9.04106
264.778	8.61004	10.2045	1.59445	-1.27556	6.6967							264.778	14.669	9.24782	3.5078	6.05892	5.74003							264.018	3.5195	0.959865	8.31883	5.75919	-3.5195	4.79932						263.257	9.63946	8.3542	14.4592	-2.57052	1.60658	7.39025	1.92789
265.539	7.95357	-1.90886	7.63543	-2.54514	2.54514							265.539	13.0439	2.86329	13.362	5.40843	-3.81772							264.778	5.74003	-7.33448	7.33448	11.1612	-4.14558	5.10225						264.018	-0.959865	-4.79932	12.4782	9.9186	-1.59977	5.75919	-3.5195
266.299	9.84958	4.13047	13.3446	2.2241	-3.49501							266.299	12.7091	9.21412	11.1205	-4.4482	1.58864							265.539	3.81772	4.454	-0.954429	2.86329	4.454	1.90886						264.778	10.2045	0	15.3067	16.9012	4.14558	-0.637781	10.8423
267.06	9.52841	11.1165	8.25796	6.35227	5.39943							267.06	3.81136	4.12898	8.25796	3.81136	-0.952841							266.299	6.35457	16.2041	-1.58864	2.2241	9.53185	10.1673						265.539	8.58986	5.40843	1.90886	1.59072	5.09029	6.681	1.27257
267.82	7.94275	0.95313	0.31771	-8.57817	7.30733							267.82	13.3438	9.84901	-2.54168	8.57817	-0.63542							267.06	7.94034	5.39943	-3.17614	-1.27045	2.54091	6.03466						266.299	2.54183	1.58864	1.58864	6.03684	2.85955	6.35457	12.0737
268.581	1.58888	8.8977	0	4.44885	12.3932							268.581	20.3376	1.58888	6.03772	5.0844	5.40217							267.82	6.98962	2.22397	10.1667	4.44794	10.4844	2.22397						267.06	14.6102	13.3398	-0.952841	0.952841	4.12898	-12.3869	8.89318
269.341	10.8005	1.90598	6.98858	-0.317663	0.317663							269.341	7.62391	7.94157	9.21222	-5.08261	4.76494							268.581	5.0844	8.57992	1.58888	5.0844	5.0844	3.8133						267.82	5.08336	9.21359	-1.90626	4.13023	0	-1.27084	-0.95313
270.102	7.61467	-9.51834	-7.61467	-2.8555	5.711							270.102	17.133	8.88378	5.07645	2.53822	3.80734							269.341	3.49429	1.27065	-6.67092	-6.35326	-0.317663	4.44728						268.581	5.0844	-1.58888	-8.57992	1.58888	10.4866	6.3555	4.44885
270.862	11.0801	-2.84918	5.06521	3.48233	3.79891							270.862	7.28124	2.84918	2.5326	-1.89945	-2.5326							270.102	1.90367	4.12461	-1.58639	12.3738	-5.711	1.90367						269.341	7.30625	9.84755	6.67092	10.4829	3.17663	-1.27065	5.40027
271.622	12.6152	4.41533	3.46918	10.0922	13.5614							271.622	1.5769	13.246	-1.5769	2.20766	-9.46141							270.862	7.59781	0	9.81384	9.49727	-6.01494	12.9796						270.102	-0.317278	3.17278	-0.634556	1.90367	2.53822	12.3738	8.56651
272.383	5.96278	-2.19681	-3.45214	-2.19681	2.82448							272.383	12.8671	-1.88298	2.82448	-4.0798	7.84577							271.622	10.7229	1.26152	2.52304	4.09994	-1.5769	0.630761						270.862	3.48233	-5.69836	-0.949727	6.01494	-5.06521	3.16575	10.1304
273.143	0.623832	-7.17406	14.0362	-1.87149	-4.67874							273.143	12.7885	3.11916	0.311916	4.99065	-4.0549							272.383	6.90427	8.47343	5.96278	8.47343	-0.941492	6.59044						271.622	9.14603	-2.83842	1.89228	2.52304	2.20766	5.04609	5.67685
273.903	11.7637	9.2871	-3.0957	5.57226	1.54785							273.903	3.0957	4.02441	7.73925	0.30957	-1.23828							273.143	10.6051	7.79789	10.2932	3.11916	-5.61448	3.11916						272.383	0	0.313831	2.19681	-2.82448	4.0798	-7.21811	9.41492
274.663	1.84063	8.58961	3.06772	-11.3506	0.613544							274.663	5.21512	12.8844	-3.68126	-1.53386	5.21512							273.903	2.47656	3.71484	-4.64355	1.23828	3.71484	-0.30957						273.143	10.6051	5.30257	8.10981	4.99065	9.35747	3.43107	6.55023
275.423	0.607582	7.59477	-2.73412	3.03791	0.911372							275.423	5.46823	14.8857	1.21516	6.07582	-2.73412							274.663	-2.45418	4.90835	10.737	-5.52189	13.8047	7.36252						273.903	-0.61914	0	-5.57226	-1.85742	0	-8.04882	-11.7637
276.184	8.11556	8.11556	2.70519	3.30634	5.71095							276.184	5.71095	-0.300576	-1.20231	1.50288	0.901729							275.423	7.29098	7.59477	13.063	0.303791	3.03791	-1.82275						274.663	11.3506	8.89638	13.8047	-3.37449	5.21512	-2.45418	1.22709
276.944	13.0773	7.13309	12.1857	4.45818	0.594424							276.944	-2.08048	-2.08048	-8.91637	5.05261	2.97212							276.184	9.91902	15.0288	-1.80346	-3.60692	-1.20231	-2.70519						275.423	13.9744	-1.51895	13.3668	15.1895	-2.73412	3.64549	5.16444
277.704	10.868	11.1617	2.0561	1.76237	-0.293729							277.704	12.3366	3.81848	3.81848	9.98678	-10.5742							276.944	9.21358	3.56655	4.45818	9.21358	4.7554	-2.08048						276.184	4.80922	3.90749	2.40461	5.41038	7.51441	6.01153	2.40461
278.464	2.90221	5.22398	1.16088	-2.32177	6.38486							278.464	6.67508	5.5142	-1.4511	0.870663	0							277.704	3.81848	-4.40593	-3.23102	7.63695	0	0.293729						276.944	11.2941	4.7554	5.94424	-2.67491	-2.67491	1.78327	4.7554
279.224	8.02359	2.86557	-4.0118	2.0059	9.74293							279.224	8.5967	3.72524	-6.87736	-2.86557	5.73114							278.464	-1.16088	9.57729	3.48265	13.3502	-6.09464	-4.93375						277.704	6.16831	4.69966	14.6864	14.099	-6.46204	8.81187	-1.76237
279.984	1.13105	0.282762	4.24142	1.97933	5.65523							279.984	12.7243	12.1588	6.50352	2.26209	1.41381							279.224	5.44458	5.73114	1.43278	12.6085	3.43868	-0.573114						278.464	12.4795	6.9653	11.3186	4.35331	0.290221	8.70663	-4.93375
280.744	11.1539	1.39423	0.836539	-1.11539	-0.557693							280.744	7.8077	2.78846	1.11539	7.8077	-0.836539							279.984	11.5932	4.80695	1.69657	13.007	1.69657	-6.50352						279.224	7.45048	-0.573114	2.57901	3.15212	11.1757	8.88326	2.0059
281.504	1.64936	3.57361	-4.67318	2.74893	3.8485							281.504	11.5455	8.52168	3.02382	8.52168	-1.64936							280.744	-0.278846	1.67308	5.85577	6.69231	16.1731	-2.23077						279.984	16.9657	11.876	-3.11038	12.1588	12.1588	-2.82762	5.37247
282.264	12.73	-2.1668	2.1668	-1.89595	-0.5417							282.264	11.3757	9.2089	-1.6251	4.8753	-1.6251							281.504	-3.8485	-0.274893	-1.37446	3.8485	1.64936	7.42211						280.744	9.75962	3.90385	-0.557693	-2.50962	-2.23077	-5.01923	5.01923
283.023	6.13582	2.40097	-6.13582	4.00162	-0.266775							283.023	9.07034	5.86904	4.80194	2.93452	-4.26839							282.264	10.5632	8.6672	2.7085	-3.7919	0.5417	9.47975						281.504	8.79657	11.8204	2.19914	2.47404	10.4459	1.09957	4.39829
283.783	8.14407	4.72882	-0.262712	3.67797	2.1017							283.783	5.51695	8.14407	-0.525424	4.20339	0.262712							283.023	14.9394	-1.60065	1.86742	3.2013	5.86904	9.33711						282.264	5.417	4.60445	8.1255	16.251	8.39635	0.81255	5.68785
284.543	18.1056	4.13842	-1.29326	1.03461	3.62112							284.543	12.4153	-0.517303	-0.517303	16.295	4.13842							283.783	6.83051	2.1017	1.31356	8.6695	9.19492	3.67797						283.023	7.73646	6.40259	-2.66775	4.80194	2.1342	2.1342	9.60388
285.303	7.8945	3.05594	-6.36653	0.254661	2.03729							285.303	7.8945	6.36653	9.16781	-2.03729	1.52797							284.543	5.43168	6.20763	10.6047	4.39707	7.75954	0.258651						283.783	2.36441	7.61865	1.57627	5.51695	5.77966	-9.72035	4.72882
286.063	10.5318	-6.77047	2.00606	-8.02426	7.27198							286.063	18.3053	2.50758	4.7644	-1.00303	7.7735							285.303	9.16781	-0.763984	6.87586	7.38518	7.13052	2.29195						284.543	7.75954	10.6047	0	-4.39707	-3.36247	9.0528	3.10382
286.822	7.90238	-2.71644	-0.987797	-1.72864	3.70424							286.822	13.0883	6.17373	1.4817	4.19814	0.987797							286.063	2.50758	7.02123	8.77653	4.7644	-0.250758	-3.0091						285.303	0	0.509323	0.254661	-0.254661	0.254661	3.56526	0.509323
287.582	10.4588	-0.729685	-1.7026	0	1.45937							287.582	6.56716	1.7026	5.83748	1.21614	-1.45937							286.822	10.8658	5.92678	8.14933	2.46949	0.493899	10.6188						286.063	8.52577	6.51971	7.02123	-0.501516	-5.01516	-3.51061	0.501516
288.342	8.62414	7.18679	2.87471	3.83295	8.8637							288.342	12.2175	12.6967	11.978	-0.718678	1.91648							287.582	4.86457	1.7026	2.43228	5.10779	0.972913	0.486457						286.822	5.18594	7.16153	10.1249	5.67983	0.987797	-0.246949	2.71644
289.101	7.31496	10.6185	-1.88773	4.2474	-2.35966							289.101	8.96673	-2.1237	3.5395	12.0343	1.88773							288.342	3.83295	3.35383	3.59339	5.50987	2.15604	2.87471						287.582	11.4317	4.86457	7.54008	4.37811	-2.91874	6.32394	4.86457
289.861	4.88147	3.71921	2.78941	4.18411	0.929803							289.861	8.83313	3.25431	1.16225	8.36823	6.74107							289.101	4.48336	5.42723	7.31496	4.01143	8.02286	5.42723						288.342	12.6967	3.11427	12.2175	1.43736	2.87471	7.42634	-6.70767
290.62	4.80991	8.01651	-3.20661	3.43565	3.43565							290.62	7.78747	7.78747	4.35182	-0.458086	5.49704							289.861	9.53048	4.41656	5.57882	4.41656	6.97352	0.232451						289.101	11.3264	-0.707899	0.707899	-1.17983	3.30353	1.4158	-6.37109
291.38	9.03249	2.25812	0.451624	4.06462	2.25812							291.38	4.06462	-2.48393	-1.35487	1.8065	2.48393							290.62	14.6588	6.18417	-0.916173	1.14522	0.229043	5.26799						289.861	12.0874	7.90333	8.60068	-0.929803	0.929803	2.32451	1.16225
292.139	10.9138	1.33638	-1.55911	2.00457	0							292.139	6.6819	1.11365	2.67276	3.34095	0.44546							291.38	18.9682	9.70993	-0.903249	4.06462	2.48393	-1.8065						290.62	13.7426	5.03895	1.6033	8.70364	5.26799	2.51947	-2.29043
292.899	1.97879	1.97879	4.17745	0.439732	0.219866							292.899	10.9933	5.27678	2.41853	9.45424	5.49665							292.139	6.45917	4.00914	12.9183	-4.67733	6.45917	7.12736						291.38	11.2906	4.29043	-4.96787	4.74206	6.09693	4.96787	3.613
293.658	4.7774	6.08033	4.7774	8.68619	2.3887							293.658	14.3322	5.86318	0.43431	0	9.55481							292.899	5.71652	6.37611	1.75893	9.45424	9.01451	3.95759						292.139	2.67276	10.691	-4.23187	10.4683	5.79098	3.34095	2.00457
294.418	3.64714	-0.643612	-3.4326	2.14537	-2.35991							294.418	9.43965	-1.50176	10.7269	5.79251	4.93436							293.658	0.434309	4.56025	7.16611	-0.868619	1.73724	1.95439						292.899	3.51786	5.71652	2.41853	2.19866	6.81585	3.07812	-1.53906
295.177	10.5993	-0.635959	5.72363	3.81575	0.423973							295.177	9.32739	0.635959	2.75582	6.57157	6.1476							294.418	9.86872	2.14538	-1.07269	5.36344	0	3.4326						293.658	1.08577	5.42887	0.43431	4.7774	6.51464	5.42887	-1.95439
295.936	4.60824	6.0745	3.77038	-4.18931	8.79756							295.936	11.1017	7.95969	3.97985	-1.46626	0.418931							295.177	12.9312	4.87568	2.11986	6.78356	-2.11986	2.33185						294.418	10.7269	-1.7163	2.14537	3.4326	-1.50176	0	6.65066
296.696	7.86614	7.86614	-0.414007	3.10506	3.93307							296.696	7.65914	9.93618	-1.65603	5.3821	6.83112							295.936	0	4.18931	4.18931	-2.72305	1.67572	-1.25679						295.177	1.90788	5.08767	-0.211986	-0.423972	-2.96781	-0.635959	7.41952
297.455	16.3703	2.8648	2.45554	9.20828	0.818514							297.455	9.82216	9.00365	2.66017	-3.06943	2.66017							296.696	3.51906	8.90116	2.69105	2.48405	3.72607	5.5891						295.936	7.12183	6.0745	-2.72305	-3.14199	3.14199	2.09466	4.18931
298.214	7.08275	10.7253	2.02364	1.21419	1.82128							298.214	13.9631	-0.202364	-2.22601	5.46384	0.809457							297.455	2.45554	8.79902	-3.27405	2.66017	4.09257	5.32034						296.696	0.621011	9.52217	2.89805	3.10506	1.44903	0.414008	-6.00311
298.973	10.6102	3.40326	1.60153	-1.40134	4.20402							298.973	8.40805	9.20881	-1.60153	4.20402	3.60345							298.214	6.2733	-0.607093	-1.61892	7.08275	-2.63074	4.85674						297.455	7.16199	2.25091	1.4324	9.82216	-0.818514	4.09257	4.09257
299.733	9.91264	3.56855	1.58602	2.18078	5.55108							299.733	7.53361	8.52487	2.18078	2.57729	4.95632							298.973	5.60536	8.80843	0.600575	2.00192	-1.40134	4.00383						298.214	1.01182	-3.84492	4.45202	-0.202364	3.03546	-0.202364	10.5229
300.492	7.85459	2.74911	8.64005	4.32003	0.39273							300.492	8.05096	2.16001	5.49822	-6.08731	3.3382							299.733	-0.793011	0.991264	5.15457	7.93011	6.74059	-0.198253						298.973	4.8046	0.600575	1.00096	1.60153	-2.20211	1.80172	5.60536
301.251	5.25568	2.33586	-0.973274	6.42361	3.30913							301.251	5.06102	0.973274	3.11448	1.75189	7.20223							300.492	6.28367	3.3382	-3.73093	5.49822	-5.49822	2.94547						299.733	3.7668	4.55981	9.91264	1.98253	0.991264	4.36156	-1.78428
302.01	8.30397	1.15869	1.73804	6.1797	0							302.01	2.12427	6.1797	3.47608	-1.54492	0.772462							301.251	9.14878	4.28241	6.61826	3.69844	2.72517	3.30913						300.492	11.9783	2.35638	8.05096	3.9273	-1.96365	1.37455	3.3382
302.769	6.51553	1.34143	2.2996	-2.8745	4.79083							302.769	18.9717	8.81513	-0.383267	5.1741	-2.49123							302.01	8.11085	0.579347	3.08985	4.82789	2.89673	1.35181						301.251	7.20223	-0.973274	5.83964	5.25568	0.973274	-1.94655	-4.67171
303.528	11.2226	2.47278	3.61407	2.09235	-0.95107							303.528	7.41835	2.85321	6.08685	3.04342	-1.71193							302.769	13.606	0.958167	-4.40757	-4.0243	1.91633	-2.8745						302.01	9.26954	0.193116	11.2007	-0.386231	0	2.70362	1.35181
304.287	11.3347	0.944559	1.88912	9.44559	-0.377824							304.287	3.77824	9.6345	4.91171	-0.944559	2.07803							303.528	8.55963	9.13027	0.95107	4.37492	12.3639	2.663						302.769	9.00677	2.68287	4.98247	0.383267	4.98247	-1.53307	-1.53307
305.046	10.1304	0	-2.06361	5.25282	1.31321							305.046	3.37682	5.44043	4.31482	4.12722	0.750403							304.287	7.17865	7.74539	4.53388	2.07803	2.26694	0.755647						303.528	5.51621	6.08685	6.08685	1.14128	-0.95107	4.94556	-2.85321
305.805	3.72668	5.59002	2.60868	5.77636	0.372668							305.805	2.23601	9.31671	2.42234	3.72668	1.67701							305.046	11.4437	2.81401	10.318	10.1304	5.44043	2.25121						304.287	6.23409	3.02259	2.64477	9.82342	1.70021	4.15606	2.64477
306.564	5.37094	3.70409	0.185205	0.740819	5.18573							306.564	10.3715	2.03725	-0.926024	2.59287	1.29643							305.805	5.40369	-4.65835	2.60868	4.09935	2.23601	4.09935						305.046	13.8825	6.75363	1.31321	7.50403	5.81563	6.56603	0
307.323	5.7062	6.07435	1.65664	4.41771	7.73099							307.323	6.25842	6.25842	-0.368142	2.02478	5.7062							306.564	4.44491	5.92655	-0.185205	5.00053	6.29696	-0.185205						305.805	9.68938	1.67701	-0.931671	10.062	2.42234	5.21736	3.91302
308.081	2.74426	1.64655	5.85442	11.16	2.19541							308.081	6.22032	-0.548852	2.74426	6.22032	2.01246							307.323	4.04956	2.39292	2.577	5.15399	-2.76107	5.52213						306.564	6.85257	4.81532	-0.185205	0.555614	4.63012	3.51889	4.44491
308.84	8.73402	4.91289	-0.727835	5.82268	3.27526							308.84	7.27835	9.64381	2.91134	-2.72938	3.45722							308.081	2.74426	5.48852	6.03737	2.56131	-1.82951	0.182951						307.323	-0.368142	1.2885	5.15399	1.65664	9.75577	-3.49735	4.96992
309.599	9.58752	9.22573	2.35166	5.06511	5.6078							309.599	7.77856	10.492	-3.61793	0	5.96959							308.84	5.45876	3.82113	3.45722	3.27526	2.91134	7.27835						308.081	5.12261	6.95212	-5.30557	7.13507	6.58622	3.11016	1.64655
310.358	12.227	8.8106	4.49521	1.97789	0.179808							310.358	11.3279	5.75386	0.719233	7.55195	-1.61827							309.599	10.492	-2.53255	9.58752	3.61793	-3.07524	5.6078						308.84	6.00464	8.55206	4.73093	3.63917	2.54742	1.45567	5.09485
311.116	10.1919	8.04626	1.07283	2.86089	3.2185							311.116	5.36417	4.82776	-1.07283	1.60925	-3.0397							310.358	5.93367	5.57406	1.79808	3.77597	4.13559	-0.719233						309.599	7.05497	5.4269	-4.16062	-1.26628	1.08538	-0.180897	-0.904483
311.875	1.7787	3.5574	6.22546	1.7787	-1.06722							311.875	6.22546	6.93694	1.95657	6.75907	-2.66805							311.116	6.0794	6.0794	3.75492	0.178806	-0.178806	2.86089						310.358	8.27118	3.77597	1.25866	0.179808	3.23655	3.23655	1.25866
312.634	6.72266	0.884561	1.06147	3.00751	2.8306							312.634	12.2069	3.18442	0	0.884561	2.8306							311.875	11.028	0.533611	2.13444	4.26889	0.17787	0.35574						311.116	9.2979	2.50328	2.32448	4.82776	5.72179	-1.07283	2.50328
313.392	9.33285	7.04366	3.34574	-3.69792	4.93056							313.392	11.0938	4.75447	4.57838	-0.704366	4.93056							312.634	2.12295	8.13796	5.66119	5.30737	0	6.54575						311.875	5.51398	5.86972	5.51398	-1.06722	4.44675	1.7787	-1.24509
314.151	11.2266	7.01664	3.85915	3.68374	5.61331							314.151	18.4187	5.26248	2.28041	2.45582	8.24455							313.392	7.04366	6.51539	3.52183	4.57838	5.63493	3.87401						312.634	7.96105	2.29986	7.60722	2.65368	2.65368	-0.353824	-2.8306
314.909	9.61155	1.5728	-0.349511	4.01938	5.59218							314.909	3.32036	10.1358	3.32036	-2.62133	7.68924							314.151	6.84122	5.4379	7.01664	9.99871	1.75416	-1.75416						313.392	5.45884	5.10665	6.33929	3.69792	-0.880457	5.10665	-0.704366
315.668	6.09317	0.174091	5.5709	4.87454	5.5709							315.668	8.87862	6.78953	5.91908	2.78545	2.08909							314.909	4.36889	1.22329	-5.06791	4.36889	6.11644	10.1358						314.151	4.91165	6.66581	8.41997	2.10499	7.54289	1.75416	2.10499
316.426	11.7959	6.07141	2.7755	5.72447	-6.24488							316.426	10.5816	9.02038	0.346938	4.51019	-0.173469							315.668	2.61136	3.6559	3.30772	-0.522272	7.83408	1.39272						314.909	11.5339	-2.62133	2.62133	0.699022	3.66987	0.873778	-1.04853
317.185	10.371	8.12392	0.345698	8.29676	0.518548							317.185	5.87688	4.66693	6.56827	7.43252	4.32123							316.426	7.28569	4.51019	0.867345	-1.73469	-0.173469	1.56122						315.668	11.3159	1.74091	3.6559	4.87454	3.6559	0.696362	3.30772
317.943	8.77747	7.57272	3.61425	4.13058	6.19586							317.943	15.1454	2.58161	5.50743	-4.30268	1.89318							317.185	7.08682	6.39542	3.62983	0.518548	2.93844	0.345699						316.426	14.9183	3.98978	2.94897	2.7755	3.64285	5.551	2.2551
318.702	13.5352	5.99662	5.82529	-2.22732	5.65396							318.702	8.90926	2.39865	4.2833	2.56998	3.94064							317.943	11.187	3.95847	0.688429	6.19586	6.02376	8.60537						317.185	2.93844	4.66693	8.46961	5.87687	4.14838	7.25967	-4.83978
319.46	8.69733	1.53482	6.13929	3.75179	2.04643							319.46	10.4027	7.67411	-0.511607	0.170536	11.767							318.702	6.68195	10.1086	5.13996	4.45463	2.05598	3.94064						317.943	8.08904	2.75372	6.36797	1.20475	6.02376	2.23739	-3.78636
320.218	4.24248	4.07278	-7.12736	2.37579	0.339398							320.218	9.67285	4.75157	6.61827	-0.509097	-1.18789							319.46	10.7438	5.45715	3.06964	6.82143	2.3875	2.89911						318.702	10.9652	4.11197	4.2833	5.48262	8.22394	8.5666	0.685328
320.977	9.28513	5.40226	1.6882	-0.675282	6.41518							320.977	12.8304	-3.03877	1.18174	6.07754	0.337641							320.218	10.0122	4.75157	4.92127	1.86669	-3.05458	9.67285						319.46	11.5964	5.45715	-3.06964	2.72857	2.89911	2.21697	0.852679
321.735	13.1064	6.04912	2.6885	1.51228	-0.840155							321.735	10.0819	8.06549	4.03275	4.20078	0							320.977	8.10339	5.23344	2.86995	3.88287	-3.54523	7.93457						320.218	6.78796	4.58188	1.01819	2.20609	5.43037	2.37579	3.22428
322.493	13.7219	8.53438	1.33873	-2.00809	1.84075							322.493	11.5465	9.20375	4.01618	7.69768	-1.50607							321.735	8.90565	6.72124	2.6885	1.84834	8.40155	2.35243						320.977	7.59692	4.8958	2.70113	1.18174	5.23344	0.337641	5.40226
323.251	13.674	4.66917	-1.00054	-2.50134	-1.16729							323.251	10.0054	8.83807	0.500268	2.6681	5.83646							322.493	2.00809	6.19161	4.01618	2.51011	5.68959	1.33873						321.735	5.88109	4.53684	1.00819	0.336062	7.22534	0	-3.02456
324.01	6.48167	6.64787	3.15774	1.99436	6.64787							324.01	9.30701	5.65069	1.66197	5.1521	0.166197							323.251	9.67185	-0.667024	0.83378	8.3378	4.1689	2.16783						322.493	8.86907	5.18757	3.51416	4.01618	3.01213	1.50607	8.1997
324.768	9.77832	3.81189	-0.994406	0.994406	3.81189							324.768	10.9385	4.14336	5.46923	4.64056	5.96643							324.01	9.8056	5.98308	0.664787	9.9718	1.82816	2.49295						323.251	7.67078	6.33673	4.00214	2.16783	6.00322	-3.16837	1.83432
325.526	10.743	9.25547	3.80136	1.15693	6.77633							325.526	10.0819	10.0819	5.45412	0.330553	5.12357							324.768	7.95525	6.62937	1.32587	5.46923	1.16014	5.3035						324.01	10.6366	5.31829	3.65633	-0.332393	1.66197	1.49577	0.99718
326.284	8.57001	4.285	4.61462	0.824039	3.62577							326.284	13.5142	12.5254	0.164808	3.62577	6.92193							325.526	9.91658	6.44578	-1.48749	5.78467	0	7.60271						324.768	12.0986	4.64056	7.29231	-3.97762	1.65734	-4.47483	-2.48601
327.042	12.4892	7.39494	0.985992	3.77964	0.164332							327.042	16.2689	5.58729	4.6013	0.657328	7.06628							326.284	9.72366	3.79058	2.30731	6.59231	3.79058	-0.988847						325.526	7.60271	2.31387	6.2805	1.48749	0.991658	-4.29718	0.495829
327.8	12.1319	4.91833	5.24622	2.62311	4.26255							327.8	13.9353	7.04961	-0.163944	7.3775	-3.60678							327.042	13.8039	9.53126	10.1886	5.91595	7.39494	7.39494						326.284	9.55885	3.13135	7.25154	1.15366	-1.48327	7.74597	-2.1425
328.558	15.0454	10.3028	3.1072	0.817683	4.41549							328.558	10.4663	9.64866	0.327073	4.08842	1.47183							327.8	11.9679	12.1319	3.60678	10.0006	-0.163944	0.327889						327.042	9.20259	8.87393	11.9962	3.28664	1.15032	5.42296	4.1083
329.316	16.9662	9.62505	7.01487	6.68859	4.73096							329.316	10.4407	9.13564	5.54664	3.42586	5.3835							328.558	8.50391	6.705	3.76134	3.59781	6.37793	3.76134						327.8	10.1646	7.21355	9.01694	7.86933	2.29522	1.4755	4.75439
330.074	8.94984	15.4588	8.29895	-1.78997	6.18353							330.074	9.92619	8.6244	6.18353	4.23084	0.325449							329.316	13.5403	9.13564	6.03605	4.24155	1.63136	-1.30509						328.558	8.0133	0.654147	6.705	3.43427	2.28951	1.63537	-1.30829
330.832	9.25024	11.1977	4.86855	1.46056	0.973709							330.832	17.3645	9.08795	1.78513	3.73255	5.51769							330.074	12.6925	6.18353	4.39356	1.62724	3.90539	1.3018						329.316	11.2564	5.87291	3.09959	4.40468	5.70978	0.815682	-3.75214
331.589	18.6108	9.54817	1.61833	3.07483	7.768							331.589	17.8017	8.09167	4.04583	2.26567	8.57717							330.832	10.8731	5.03083	2.59656	12.0091	6.65368	-0.32457						330.074	9.92619	7.15988	1.78997	3.25449	0.162724	5.20718	3.90539
332.347	15.9793	11.1371	6.7791	3.22814	1.61407							332.347	16.7863	5.48784	1.45266	0.807036	1.61407							331.589	16.9925	4.04583	2.58933	5.66417	1.13283	1.4565						330.832	12.9828	11.8468	6.4914	6.00454	3.73255	-0.32457	3.2457
333.105	14.652	7.88952	3.0592	5.15234	4.02527							333.105	15.296	14.0079	11.4318	2.57617	4.02527							332.347	12.5898	10.9757	5.48784	5.81066	4.03518	2.42111						331.589	14.565	8.41533	-3.3985	4.53133	0.971	0.161833	3.72217
333.863	13.8165	11.0853	2.89183	2.2492	1.60657							333.863	14.1378	6.58695	5.94432	5.623	1.1246							333.105	12.7198	8.21154	5.79638	4.18628	9.33862	0.805053						332.347	13.7196	5.48784	0	3.87377	5.81066	2.42111	6.13347
334.621	12.5067	7.05507	10.5826	5.77233	2.2448							334.621	13.7895	7.5361	6.89473	4.32925	1.60343							333.863	10.2821	6.7476	3.69512	3.21314	4.81972	8.03286						333.105	12.8809	9.49963	1.77112	1.77112	2.41516	1.77112	3.86426
335.378	19.3589	5.11971	2.87984	2.71984	0.639964							335.378	11.3594	8.31953	3.5198	3.67979	3.5198							334.621	16.0343	4.32925	4.00856	4.97062	2.08445	1.28274						333.863	7.8722	7.71155	3.3738	5.94432	4.4984	-0.963943	4.33774
336.136	17.2363	7.66058	3.03231	6.06463	3.67069							336.136	14.204	10.8525	5.74543	4.78786	5.58584							335.378	14.0792	7.0396	2.55985	9.59945	2.55985	-0.799955						334.621	11.3843	8.81884	4.48959	6.89473	4.97062	-2.56548	1.92411
336.893	14.1655	6.20734	4.77488	3.66074	5.57069							336.893	12.8922	11.4597	9.23143	0.477488	8.75394							336.136	12.2888	9.57572	8.13936	2.39393	4.94746	2.87272						335.378	13.4392	3.35981	4.63974	3.35981	5.75967	7.51957	5.2797
337.651	20.6347	13.0158	6.34915	6.34915	4.44441							337.651	19.0475	8.57136	5.07932	2.69839	1.1111							336.893	14.3246	5.88902	6.52567	4.45655	-0.159163	7.00315						336.136	7.50098	4.14948	6.06463	5.26665	3.5111	2.55353	5.10705
338.409	12.0325	6.64954	4.11639	4.908	3.00813							338.409	19.4737	9.81599	7.44116	1.58323	4.74967							337.651	10.6348	8.41263	10.6348	1.26983	4.76186	4.60313						336.893	14.8021	6.04818	7.00315	2.06911	-2.38744	-0.63665	4.61571
339.166	21.8038	6.16195	2.84398	2.68598	0.631995							339.166	17.5378	8.37393	3.79197	6.95194	4.89796							338.409	15.0406	8.07445	6.3329	4.43303	5.38297	1.10826						337.651	11.9047	6.98407	4.92059	7.77771	5.55551	0.634915	1.42856
339.924	13.4123	4.26039	7.57402	6.94285	6.62727							339.924	16.2526	14.2013	7.57402	1.42013	6.31169							339.166	16.9059	7.42594	3.15997	6.79394	4.42396	0.631995						338.409	13.6157	12.0325	7.91613	0.949935	0	1.4249	5.38297
340.681	12.1384	8.03972	1.41877	0.945849	2.52226							340.681	14.3454	11.8231	6.14802	9.61613	6.30566							339.924	15.4636	10.7299	-0.315584	5.68052	7.73182	3.62922						339.166	15.9579	7.58394	4.58196	5.21396	7.74193	7.74193	1.73798
341.438	20.1637	10.8695	11.1846	4.72587	2.99305							341.438	16.0679	10.3969	9.76679	9.13668	3.93822							340.681	12.9266	5.51745	10.562	10.2467	9.14321	9.77378						339.924	20.3552	7.10065	5.20714	5.04935	1.42013	2.52467	-2.52467
342.196	17.322	6.9288	4.09429	2.67704	8.34605							342.196	20.9439	7.55869	4.09429	7.55869	5.03913							341.438	16.383	9.60926	4.41081	9.76679	7.40386	9.76679						340.681	16.71	10.8773	7.40915	7.40915	0	4.72925	0.315283
342.953	28.1806	13.6967	3.30611	4.88044	3.7784							342.953	18.5772	10.548	7.55681	6.76964	2.04664							342.196	18.8967	12.1254	11.1806	3.62187	7.24374	3.4644						341.438	19.8486	6.30116	12.1297	5.04092	4.09575	9.60926	-0.315058
343.711	21.7166	12.5894	6.45204	4.56364	1.10157							343.711	18.7267	8.49781	2.98997	4.72101	1.8884							342.953	15.9008	8.65884	4.88044	11.0203	1.25947	-0.157434						342.196	13.3852	9.60584	3.62187	6.14144	8.661	5.1966	5.66902
344.468	21.0815	6.45031	4.40509	3.77579	3.14649							344.468	16.9911	8.02356	8.81019	4.24777	5.66369							343.711	17.7825	12.7467	8.02571	11.6452	3.77681	3.3047						342.953	19.6792	9.44601	5.82504	10.2332	4.72301	5.03787	0.787168
345.225	21.8637	12.4261	5.50524	6.92087	4.40419							345.225	13.6844	15.2574	11.3251	4.40419	5.50524							344.468	15.1032	8.49554	6.76496	8.81019	5.34904	0.629299						343.711	16.9956	12.7467	5.50784	6.92414	5.19311	1.73104	5.19311
345.982	21.5343	11.3173	5.50145	5.65864	8.95951							345.982	26.5642	12.7319	4.87272	6.13019	5.81582							345.225	23.4366	12.898	5.81982	6.44899	8.02192	4.0896						344.468	19.6656	12.7433	7.07961	5.97834	4.40509	1.10127	3.30382
346.739	23.8669	10.5203	6.28077	8.00798	4.55356							346.739	18.0572	11.6194	8.165	3.92548	6.28077							345.982	16.19	11.0029	11.0029	5.18708	4.71553	4.40116						345.225	16.2011	9.90943	4.40419	6.60628	5.03336	5.50524	-0.62917
347.497	19.1316	19.602	8.31127	3.29314	7.52719							347.497	25.4042	14.1135	9.09535	6.27265	4.07723							346.739	18.5283	10.2062	7.06586	3.92548	9.57817	4.55356						345.982	17.1331	14.3038	10.217	6.28738	1.88621	2.9865	3.30087
348.254	22.0799	16.4424	6.26379	4.38465	7.20336							348.254	24.5854	12.6842	8.45612	2.50552	5.32422							347.497	14.5839	12.7021	4.39086	6.42947	6.89992	4.54767						346.739	13.3466	8.63605	6.43778	10.2062	5.02461	-0.785096	2.51231
349.011	25.6351	15.7875	1.71943	4.0641	4.22041							349.011	23.6031	17.3506	7.19033	6.09615	10.3166							348.254	21.1403	10.3353	7.51655	8.9259	4.38465	4.38465						347.497	18.0339	13.1726	4.39086	5.64539	5.64539	6.11584	5.17494
349.768	22.3146	15.9167	6.86603	9.8309	8.1144							349.768	17.4772	15.2925	7.95835	5.46161	5.14952							349.011	22.9778	10.9418	5.47091	6.56509	4.0641	3.75148						348.254	20.5139	14.0935	10.805	0.469784	2.81871	1.40935	5.16763
350.525	25.7114	17.92	2.49322	4.20732	5.92141							350.525	25.0881	14.6477	11.9986	9.66124	12.6219							349.768	24.4992	15.7607	8.1144	5.61766	12.7958	2.34069						349.011	21.8836	11.5671	7.34664	10.0039	-1.25049	1.4068	0.93787
351.282	22.8786	15.408	6.06982	9.64946	4.98037							351.282	25.9913	13.696	6.22546	7.15928	8.71564							350.525	18.855	11.687	11.2195	2.9607	6.54471	6.54471						349.768	16.2288	11.7035	6.24184	6.70998	0.468138	1.09232	6.0858
352.039	24.7207	16.6359	9.32855	7.30736	6.84094							352.039	27.8302	11.1943	8.86212	2.95404	5.1307							351.282	27.0808	14.3186	10.4276	12.6066	4.98037	6.53673						350.525	22.7507	14.8035	10.5962	2.49322	4.20732	9.66124	3.42818
352.796	33.8716	14.139	6.21496	2.64136	8.85632							352.796	27.5012	18.1788	8.54558	8.85632	8.3902							352.039	26.2754	14.7702	11.6607	9.6395	0	6.68546						351.282	24.7462	14.7855	13.2291	4.35782	1.712	4.6691	1.712
353.553	24.8539	19.2618	6.21348	0	5.12612							353.553	30.446	14.757	5.43679	8.69887	5.28146							352.796	18.0234	17.7126	4.97197	10.8762	9.16707	7.45796						352.039	18.8126	10.7278	16.4804	8.55117	7.61832	1.86571	3.57594
354.31	29.1981	19.8796	2.64026	7.29954	4.81459							354.31	33.2362	19.4137	9.9398	9.00794	9.31856							353.553	29.048	11.8056	15.3784	9.32021	6.52415	2.9514						352.796	25.0152	12.4299	16.1589	6.99184	6.68109	4.97197	1.08762
355.066	29.5119	19.5711	9.94085	7.61097	0.621303							355.066	31.5311	22.3669	12.2707	7.92162	6.05771							354.31	26.2473	13.2013	9.78449	6.83361	9.31856	6.83361						353.553	26.8733	14.1357	10.8736	12.427	4.50477	2.79606	0
355.823	30.1313	18.172	9.47429	3.41696	5.90202							355.823	29.5101	17.0848	9.94024	10.2509	12.4253							355.066	28.2693	12.1154	10.4068	11.8048	5.59173	4.8151						354.31	29.1981	15.065	11.1823	9.00794	6.98892	4.50397	2.95088
356.58	32.9197	23.9133	11.3355	4.03732	6.05598							356.58	34.6278	21.2736	13.1989	8.54048	5.12429							355.823	31.3739	15.6869	10.8721	11.6487	5.7467	4.97012						355.066	28.4246	16.6199	8.23227	13.358	7.76629	7.76629	7.92162
357.337	27.3034	17.53	10.0836	9.9285	4.18859							357.337	30.5612	21.5635	13.4966	6.36045	8.22204							356.58	31.8327	14.4412	12.2672	11.8014	6.21126	4.65844						355.823	29.6654	14.4444	9.47429	9.6296	12.4253	4.19354	8.69771
358.093	35.1629	21.9962	10.2236	2.47844	0.309806							358.093	28.3472	20.2923	8.82946	6.04121	10.5334							357.337	30.7163	18.1505	8.06691	14.1171	10.0836	4.34372						356.58	29.3482	17.081	11.4908	12.4225	7.76407	6.21126	2.4845
358.85	39.4102	21.9461	9.27299	3.70919	4.17284							358.85	30.6009	24.728	9.58208	11.9003	4.63649							358.093	32.8394	14.0961	10.3785	10.2236	7.74514	1.85883						357.337	27.7688	16.2889	13.8068	9.30797	11.0144	6.67071	0.620531
359.607	31.7524	24.1996	14.489	4.77827	2.46621							359.607	35.2976	21.271	12.331	6.31965	9.24827							358.85	27.2008	13.9095	14.064	9.42754	10.0457	8.50024						358.093	30.0511	15.8001	10.2236	4.02747	9.44907	6.50592	2.01374
360.363	38.7159	23.1988	17.5144	9.37171	3.07269							360.363	36.7187	19.5116	11.8299	9.52535	12.598							359.607	28.5155	17.5717	11.8686	4.62414	6.16551	9.86482						358.85	24.728	18.7005	5.71834	6.80019	5.71834	6.33654	8.80934
361.12	35.3636	23.2696	13.4719	12.0941	8.87918							361.12	34.292	26.9437	8.26683	11.1755	9.33845							360.363	30.1124	21.2016	13.5198	9.67898	8.60354	7.68173						359.607	30.5193	20.1921	12.9476	8.01517	7.39862	5.39482	6.47379
361.876	38.2733	23.9399	9.91141	10.3689	8.84403							361.876	34.6137	25.4647	12.6561	11.2838	12.0462							361.12	35.5167	23.4227	12.5533	10.257	9.18536	13.9311						360.363	35.0287	12.598	17.0534	9.37171	8.29627	3.68723	2.61179
362.633	37.8062	27.0261	9.26176	1.97382	5.76962							362.633	38.7172	25.5078	13.0576	10.0209	9.86908							361.876	34.4612	19.9753	19.5179	9.45396	13.266	8.84403						361.12	27.403	18.6769	8.72609	6.88902	2.9087	8.26683	6.42975
363.389	42.9074	27.0437	13.2952	7.10087	4.38139							363.389	36.8641	25.8351	12.6909	5.28788	10.8779							362.633	37.1989	23.6858	13.5131	11.6911	8.50259	11.0837						361.876	28.3619	21.5001	10.9788	10.2164	0.304966	4.11705	4.42201
364.146	35.3168	25.6986	10.9708	10.9708	7.36393							364.146	40.1259	25.2478	15.9301	10.2193	7.21365							363.389	33.8424	22.2091	15.2593	16.3169	11.1801	7.10087						362.633	35.8324	18.2198	15.1832	10.4764	8.50259	3.64397	6.83244
364.902	42.8872	19.5757	16.7365	14.6444	11.6558							364.902	44.3815	22.1161	15.9893	11.3569	12.8512							364.146	34.2648	22.8432	12.6239	11.121	5.41024	7.6645						363.389	39.8857	17.6766	16.9212	5.59005	6.64762	5.74113	2.87057
365.658	42.7845	28.6716	10.9932	7.72498	8.76488							365.658	41.7446	28.2259	13.9644	12.6274	14.4101							364.902	38.7031	17.6331	16.4376	13.5984	6.42561	7.62107						364.146	38.0219	19.2364	16.0804	8.26564	10.069	10.9708	3.60682
366.415	44.298	30.861	11.8128	13.7324	4.13448							366.415	45.7746	29.089	12.4034	9.74557	16.5379							365.658	36.248	24.2148	15.1528	17.5298	5.79373	6.23941						364.902	34.3695	21.5183	14.6444	9.41427	11.058	12.8512	6.42561
367.171	45.9433	29.6503	13.0637	4.69708	11.7427							367.171	46.5304	28.6228	15.9994	14.6784	13.2105							366.415	40.0159	22.4443	14.323	10.1885	9.89323	10.9268						365.658	39.6648	20.9466	16.4899	12.0331	9.95334	7.13075	6.09085
367.927	50.2114	29.1927	10.9473	12.9908	8.46588							367.927	49.9195	28.9008	15.4721	13.1367	5.54661							367.171	45.2094	24.9532	15.2655	15.1187	13.5041	7.77954						366.415	37.9486	23.6256	12.5511	8.71195	10.3362	9.00727	6.34938
368.683	57.3492	32.3769	17.4226	16.987	10.7439							368.683	51.1062	32.8125	16.4062	9.72759	12.341							367.927	49.1897	29.4846	15.6181	13.4286	7.5901	12.8448						367.171	43.0076	22.7515	20.2562	12.7702	6.01813	6.01813	10.1281
369.44	60.507	39.8566	16.8957	18.1954	7.94244							369.44	48.8099	35.6688	24.5494	12.7079	10.975							368.683	55.0262	28.8924	18.7292	15.5351	8.85647	13.2121						367.927	42.3294	25.6896	15.3262	17.8075	12.5529	9.04974	2.62734
370.196	65.9192	37.9143	13.6434	10.4839	17.0902							370.196	54.2864	41.2174	21.9731	15.5104	13.3562							369.44	50.6872	29.1704	22.8165	11.8415	13.8632	12.1303						368.683	47.6216	24.3916	13.6477	15.6803	10.5987	12.1958	8.4209
370.952	64.2682	39.5606	8.99755	13.7105	14.7103							370.952	64.5538	36.9899	20.1374	17.281	11.8539							370.196	59.1693	29.5846	22.6911	15.9412	15.2232	13.9306						369.44	48.2323	28.4484	17.329	15.1628	12.5635	15.7405	11.5526
371.708	73.6761	41.5936	18.0286	10.079	13.0601							371.708	69.5593	41.5936	21.0098	13.9119	13.7699							370.952	57.2701	28.7065	23.565	23.4222	17.8523	15.2815						370.196	49.8343	33.8931	20.6805	18.3827	13.787	6.17543	12.3509
372.464	71.0953	42.0365	18.7613	12.1313	13.8241							372.464	75.4682	48.1022	19.7487	20.5951	20.8772							371.708	70.2691	38.6125	25.5524	14.7636	15.7573	11.3566						370.952	55.2706	40.5604	17.281	17.281	15.9956	7.28373	11.5683
373.22	83.2619	49.9011	17.8018	15.1385	14.9984							373.22	76.3935	47.378	24.2497	22.848	13.1761							372.464	70.39	39.2152	23.4163	21.4414	13.683	9.87434						371.708	64.1649	32.7923	25.1265	19.1643	13.2021	11.2147	8.94334
373.976	84.8177	53.6204	22.0053	20.334	11.699							373.976	81.3359	52.3669	22.9802	19.7769	11.699							373.22	79.0568	38.1267	29.5762	22.7078	14.1573	13.1761						372.464	67.1455	37.3814	26.2375	17.0685	15.5168	11.5671	7.89947
374.732	93.0913	61.5537	26.0047	20.1951	16.3221							374.732	87.5584	58.0956	29.6011	24.8981	21.3017							373.976	82.7286	42.8963	31.7544	28.2726	21.7267	13.5096						373.22	66.8619	39.3882	30.2771	22.9881	16.1197	9.67184	13.1761
375.488	98.5777	60.547	26.2233	21.9672	18.1229							375.488	92.674	54.3687	29.5184	18.1229	24.0266							374.732	88.3883	51.0411	33.1975	30.9843	17.0137	14.1089						373.976	77.0184	37.7432	30.9188	23.2587	18.6627	15.1808	9.0528
376.244	103.501	67.4119	26.2839	18.5213	18.2489							376.244	101.322	62.5093	34.1826	26.1477	21.7897							375.488	91.1637	53.545	35.5594	30.8913	19.6332	17.5737						374.732	77.8758	46.0615	34.8574	17.7053	19.9185	19.0886	9.6826
377	112.561	69.2371	28.8825	20.1098	26.3182							377	104.598	66.2678	36.0357	26.7231	24.0238							376.244	100.505	53.521	36.4978	29.4161	23.4239	17.4318						375.488	88.8297	51.0737	39.8155	20.3196	16.6127	17.9856	11.9446
377.755	119.603	77.2411	32.0724	24.5889	20.1789							377.755	118.401	72.163	37.5515	24.3216	26.1925							377	104.058	63.1636	38.465	30.0972	25.3734	19.435						376.244	89.6102	47.5288	35.1359	27.5095	16.6147	16.0699	14.8442
378.511	120.197	80.6605	34.1154	28.5618	20.7602							378.511	118.611	79.206	33.9832	28.1651	24.3304							377.755	116.263	61.4722	40.7587	30.7361	24.3216	17.1053						377	98.6595	52.9063	43.3238	27.128	20.7846	19.0301	17.2755
379.267	142.294	82.656	37.5352	27.9879	24.8491							379.267	131.439	80.0403	46.167	26.9417	26.1569							378.511	117.421	61.2227	42.1815	39.9336	28.0328	22.0825						377.755	111.585	56.394	45.9705	28.9988	20.7134	20.3125	16.1699
380.023	147.159	87.6749	35.0441	30.0009	29.225							380.023	135.909	87.9336	46.2944	31.8113	30.3888							379.267	132.616	70.2314	44.99	37.666	29.165	24.0644						378.511	111.602	68.0986	47.3385	31.7353	23.537	21.0246	14.6776
380.778	149.936	94.7169	37.1965	28.2489	27.9932							380.778	142.906	89.604	46.3998	38.6026	32.4671							380.023	135.004	75.5194	52.2429	39.8287	31.8113	23.4058						379.267	119.668	66.3079	45.5131	34.658	25.6338	20.7948	14.5171
381.534	155.678	100.458	47.8912	29.4424	31.2114							381.534	152.772	97.0461	48.2703	37.0241	34.1178							380.778	140.733	81.2955	52.4074	40.2643	31.8279	24.6698						380.023	124.141	68.2778	51.3377	39.958	31.6819	26.6387	20.4316
382.29	166.399	100.439	44.5978	35.9781	32.4802							382.29	157.529	100.814	51.4686	38.4765	33.1048							381.534	156.563	81.7562	54.5884	43.4685	37.6559	27.2942						380.778	138.432	72.987	54.4526	38.8582	28.888	26.8428	18.2787
383.045	179.516	112.306	50.7785	33.2346	32.7404							383.045	166.791	102.422	55.844	39.412	32.3697							382.29	159.528	89.0707	59.9634	43.7233	33.6045	27.4832						381.534	140.009	81.5035	57.4947	42.3313	31.4642	27.6733	16.3007
383.801	185.514	117.443	54.872	37.5183	34.5853							383.801	178.915	109.133	63.6711	45.7063	38.3738							383.045	167.161	96.7386	58.562	48.0604	36.941	26.81						382.29	148.784	81.95	59.3388	41.2249	33.7294	25.7343	22.1115
384.556	201.564	125.388	53.9277	38.5716	37.8461							384.556	188.989	126.234	62.3916	53.5649	41.3526							383.801	176.104	101.923	67.4596	52.1834	42.0401	33.4854						383.045	155.301	91.0553	67.7046	47.1956	29.6517	26.81	22.2387
385.312	217.166	138.197	57.552	44.9887	44.869							385.312	210.585	128.505	68.6795	51.4498	41.9974							384.556	188.747	103.019	70.4929	55.0159	39.6598	35.186						383.801	164.25	93.1236	63.5489	50.7169	43.1399	32.2633	25.7862
386.067	240.358	152.621	64.8848	45.5851	44.0459							386.067	232.662	144.215	76.1331	57.899	48.19							385.312	211.423	113.788	75.2603	57.3127	51.0909	37.0917						384.556	175.93	98.545	73.0321	53.444	40.3853	34.3396	23.4573
386.823	270.045	168.002	69.3565	52.7203	48.3855							386.823	262.313	163.784	88.6873	63.3815	51.6659							386.067	233.017	131.309	84.6581	66.1872	47.598	43.4539						385.312	196.227	106.728	72.628	58.7485	43.9118	33.3826	24.4088
387.578	315.722	192.819	81.3943	64.698	57.3934							387.578	299.605	185.514	94.8441	67.8286	60.7559							386.823	255.401	146.445	93.3735	72.6369	61.6242	47.214						386.067	211.349	114.14	83.8293	59.2015	47.3612	38.7177	31.0216
388.333	356.123	223.223	92.1582	75.2874	64.4993							388.333	341.203	213.812	110.751	85.846	70.6967							387.578	287.663	160.818	110.961	81.7421	57.6253	53.3353						386.823	237.124	134.144	93.6078	66.3104	50.3772	42.5277	35.264
389.089	411.765	256.899	106.464	82.4894	74.195							389.089	380.633	253.717	127.256	103.169	80.4442							388.333	334.317	194.875	124.982	95.9455	70.582	60.1381						387.578	272.358	152.353	112.004	82.2059	60.6399	44.2915	36.9869
389.844	479.474	299.362	124.987	98.0997	86.2872							389.844	448.311	286.762	153.562	113.512	91.9122							389.089	384.042	221.108	138.505	111.69	86.0117	66.9232						388.333	307.921	171.577	125.441	89.7481	66.9094	54.9736	40.5129
390.599	556.187	346.586	146.23	114.044	103.575							390.599	532.019	339.125	178.082	135.984	107.584							389.844	452.024	253.349	165.262	132.412	101.025	78.8623						389.089	365.748	198.043	143.959	102.373	77.49	62.8328	46.8122
391.354	706.408	444.4	184.156	141.701	126.924							391.354	672.334	425.433	217.458	168.717	137.4							390.599	534.692	304.934	195.122	153.358	113.932	91.5469						389.844	419.286	232.649	173.137	119.587	92.5872	74.9248	54.6748
392.109	1000.15	621.627	266.037	197.453	178.122							392.109	947.62	598.037	314.09	236.113	184.238							391.354	669.908	377.574	244.034	187.795	144.016	122.513						390.599	495.155	274.418	196.236	141.998	104.911	89.8764	62.7018
392.865	1661.5	1018.3	428.439	332.906	292.55							392.865	1578.19	980.974	507.419	384.73	311.376							392.109	944.781	534.804	344.669	269.969	197.671	166.328						391.354	622.38	341.294	251.863	178.532	132.438	112.919	82.043
393.62	3136.85	1937.65	809.437	609.678	536.443							393.62	2964.43	1853.48	964.59	716.688	588.447							392.865	1580.46	878.949	571.36	438.825	333.338	269.181						392.109	883.405	487.625	347.071	254.788	193.194	160.976	112.487
394.375	6016.8	3729.25	1534.39	1181.89	1044.97							394.375	5690.45	3559.37	1845.54	1383.76	1124.59							393.62	2958.11	1655.87	1073.1	817.157	614.717	502.453						392.865	1464.81	797.805	576.121	415.348	308.995	258.903	185.332
395.13	10587.6	6546.38	2706.84	2071.22	1830.42							395.13	10021.3	6273.01	3266.55	2417.97	1972.54							394.375	5727.01	3170.41	2049.01	1586.58	1185.61	967.684						393.62	2771.43	1494.17	1079.96	779.628	579.226	478.328	343.118
395.885	16586.5	10257.7	4247.97	3257.23	2879.75							395.885	15674.2	9832.37	5131.6	3834.82	3112.37							395.13	10067.6	5582.57	3619.52	2767.99	2105.8	1696.64						394.375	5318.17	2882.54	2073.03	1486.98	1119.49	908.26	666.525
396.64	23557.5	14608.6	6099.65	4665.6	4121.84							396.64	22328.7	14024.6	7345.39	5465.26	4443.44							395.885	15713.3	8757.96	5677.7	4371.08	3311.83	2686.03						395.13	9335.35	5067.24	3643.87	2623.76	1956.62	1591.32	1176.57
397.395	31029.4	19290.8	8066.52	6167.24	5480.27							397.395	29370.6	18505.1	9709.78	7267.1	5911.93							396.64	22423.1	12482.8	8135.08	6255.27	4727.16	3850.26						395.885	14637.2	7978.82	5750.6	4127.06	3079.42	2522.97	1855.64
398.149	38078.5	23755.8	9992.81	7661.22	6775.9							398.149	36098.8	22793.7	11990.3	8990.06	7304.92							397.395	29553.5	16472.5	10742.6	8297.4	6283.29	5112.62						396.64	20842.2	11382.4	8172.15	5890.58	4427.77	3630.08	2649.37
398.904	43738.7	27388.8	11521.3	8868.14	7846.25							398.904	41538.7	26364.7	13892.7	10411.2	8487.12							398.149	36260.2	20340.7	13290.3	10298.3	7780.49	6342.3						397.395	27462.3	15029.6	10877.5	7805.23	5856.48	4814.12	3527.9
399.659	46929.2	29493.5	12458.3	9607.65	8498.1							399.659	44555.8	28333.5	15019.4	11272.4	9192.59							398.904	41675.2	23435.2	15344.7	11908.2	9052.09	7369.07						398.149	33701.7	18547.7	13413.9	9626.89	7258.95	5960.61	4383.59
400.414	47091.8	29634.5	12585	9700.64	8595.25							400.414	44646.4	28496.5	15146.8	11386.5	9330							399.659	44808.8	25256.4	16574.5	12859.9	9788.48	7969.87						398.904	38823.2	21409.3	15514.4	11218.8	8430.55	6925.07	5088.22
401.169	43981.6	27774.2	11884.7	9145.19	8130.65							401.169	41753.7	26730.1	14266.3	10773.1	8782.88							400.414	44908.8	25459.2	16738.7	12967.9	9892.5	8079.51						399.659	41628.6	23074.3	16752.7	12122	9137.68	7498.58	5537.36
401.923	38340.8	24273.4	10379.8	8048.55	7129.45							401.923	36467.2	23418.3	12541.6	9484.01	7731.39							401.169	42005.4	23898.4	15781.2	12244.6	9325.34	7629.39						400.414	41768.3	23278	16870.4	12202.2	9253.68	7603.59	5601.66
402.678	31142	19722	8539.57	6570.93	5846.33							402.678	29583.9	19066.7	10235.8	7748.06	6326.73							401.923	36626.4	20971.6	13791.3	10789.1	8232.03	6733.47						401.169	38998	21843.1	15871.4	11554.3	8751.89	7197.7	5311.1
403.433	23285.9	14793.3	6427.19	4970.89	4416							403.433	22173.4	14343.9	7732.64	5851.67	4806.46							402.678	29816.5	17076.1	11314.6	8796.52	6727.97	5528.01						401.923	34027.2	19088.4	13940.2	10150.5	7678.11	6335.69	4698.57
404.187	15788.7	10057.6	4381.74	3387.9	3029.9							404.187	15057.4	9741.29	5252.89	4008.49	3282.42							403.433	22284.7	12867.3	8524.29	6660.12	5096.59	4178.75						402.678	27680.2	15577.2	11372.8	8282.52	6296.98	5203.06	3835.69
404.942	9303.87	5973.37	2586.64	2008.34	1790.54							404.942	8896.19	5767.34	3129.82	2373.71	1943.65							404.187	15117.3	8727.02	5824.59	4539.63	3460.44	2866.25						403.433	20766.6	11750.8	8610.18	6278.99	4764.4	3947.01	2912.71
405.696	4603.03	2945.45	1285.15	993.077	893.847							405.696	4390.24	2873.61	1535.5	1170.05	960.356							404.942	8960.98	5183.2	3462.31	2690.63	2072.54	1705.13						404.187	14073.2	7947.67	5829.68	4283.1	3272.84	2697.13	2008.6
406.451	2013.97	1289.23	558.225	431.22	383.81							406.451	1922.9	1239.31	670.969	507.346	419.753							405.696	4422.86	2555.98	1695.63	1340.92	1022.22	837.988						404.942	8340.85	4716.96	3469.12	2532.36	1932.66	1611.85	1188.41
407.205	1099.33	697.623	300.708	225.507	212.654							407.205	1053.87	675.466	358.739	276.153	219.464							406.451	1935.05	1117.12	739.386	585.977	446.349	366.368						405.696	4115.1	2342.9	1718.67	1255.34	954.45	793.455	592.284
407.96	845.23	532.076	227.705	176.436	154.668							407.96	800.644	513.267	274.678	208.992	174.526							407.205	1041.97	600.457	395.572	305.792	239.415	192.319						406.451	1815.56	1025.77	754.129	544.253	413.393	344.205	260.852
408.714	735.014	459.443	195.845	152.419	134.46							408.714	695.769	445.664	238.226	176.27	143.107							407.96	800.739	455.983	304.371	238.494	184.36	146.934						407.205	983.08	556.142	404.397	293.226	220.999	189.058	135.151
409.469	636.504	406.364	176.129	131.387	118.144							409.469	607.276	387.351	208.574	159.481	129.968							408.714	694.343	392.831	257.991	204.778	155.27	128.948						407.96	752.429	419.608	306.089	223.791	167.939	137.864	101.584
410.223	562.864	350.507	152.464	119.598	105.19							410.223	535.366	340.713	185.801	136.172	114.701							409.469	615.6	358.784	234.87	179.44	137.536	113.509						408.714	645.691	365.274	261.032	190.904	147.288	124.482	88.3727
410.977	489.044	316.06	132.106	102.666	90.5707							410.977	472.074	305.371	159.671	123.011	100.415							410.223	538.473	302.574	203.128	155.572	120.351	98.5977						409.469	568.02	318.583	230.14	170.17	131.671	108.023	73.7811
411.731	430.554	268.174	115.412	89.5469	81.2365							411.731	415.053	260.517	140.53	107.755	88.5198							410.977	467.48	268.149	174.391	135.95	103.697	86.0703						410.223	499.675	281.856	201.998	147.19	113.477	93.2299	66.391
412.486	375.926	236.605	101.003	79.7982	69.5677							412.486	356.674	229.257	125.371	90.3078	75.241							411.731	419.162	235.773	156.31	118.493	92.3482	76.1942						410.977	439.915	240.584	178.985	131.824	102.384	79.5072	63.9433
413.24	332.446	204.34	86.0526	68.0825	60.0238							413.24	315.125	197.949	105.412	79.8464	68.9162							412.486	360.022	209.54	135.415	105.189	79.6122	67.3356						411.731	381.438	216.07	154.163	114.571	84.7848	71.0586	54.0643
413.994	291.593	179.882	76.1961	55.5328	51.6584							413.994	276.188	177.484	93.1696	70.2923	57.9312							413.24	313.921	180.257	116.805	91.7956	68.3604	56.5038						412.486	332.307	187.126	136.717	100.445	75.241	64.2664	45.1074
414.748	256.181	157.953	67.7206	50.2621	47.138							414.748	241.295	157.586	84.9034	56.1429	49.4351							413.994	280.8	152.946	103.686	79.7938	60.5141	48.2453						413.24	286.132	160.063	116.157	84.5705	65.211	55.1144	40.3864
415.502	226.684	140.202	59.8513	49.6015	40.0839							415.502	215.977	139.47	73.7617	52.6215	44.1106							414.748	245.705	135.625	91.6112	67.9963	49.8027	42.4517						413.994	258.292	146.304	109.59	71.7683	54.4258	46.1236	36.9911
416.256	200.983	128.702	50.6788	38.3737	37.6445							416.256	192.051	124.509	62.8016	50.4965	40.6524							415.502	220.004	120.984	81.9981	60.4919	45.5748	36.3317						414.748	233.209	123.955	91.6112	65.5153	46.9542	40.5221	29.7713
417.01	185.31	117.214	47.8482	38.7688	33.9568							417.01	176.684	114.763	56.9276	45.8507	34.7739							416.256	192.78	109.014	72.1899	54.3247	43.9337	33.3605						415.502	202.067	108.355	80.4423	58.387	45.2088	38.4366	28.5529
417.764	172.747	105.547	48.568	34.4589	35.0015							417.764	164.607	100.392	54.9895	40.6994	34.6397							417.01	179.59	101.87	67.8228	51.026	35.8635	31.3238						416.256	180.566	100.081	74.8332	52.5929	42.7488	35.3658	25.2482
418.518	161.962	97.2855	45.7602	32.6087	29.8162							418.518	152.324	97.3756	51.165	38.1936	32.1583							417.764	164.516	92.7043	59.4212	45.0407	36.0868	29.394						417.01	164.246	89.4316	66.7333	51.8431	36.6806	28.7816	20.3378
419.272	152.248	95.1888	44.0506	28.5297	24.7617							419.272	142.021	92.3179	48.4467	38.0396	28.5297							418.518	155.387	85.5752	57.4705	43.7785	35.7614	26.213						417.764	152.487	81.4893	59.1499	44.6789	35.3633	25.0528	20.1688
420.026	140.998	88.3696	38.5109	26.9844	22.4275							420.026	138.407	89.1737	45.3017	34.0433	27.7886							419.272	147.493	78.3222	53.74	41.1797	31.2212	26.0177						418.518	142.775	78.549	56.1193	42.8777	29.9964	27.8345	19.4571
420.78	138.024	85.0746	36.219	28.4769	23.4934							420.78	131.883	84.4517	41.4694	34.4392	28.5659							420.026	133.135	76.6644	50.3948	40.298	30.9159	25.108						419.272	140.226	75.8101	50.241	41.8974	31.7595	28.44	20.0964
421.533	132.322	78.0812	33.8559	23.2205	24.0182							421.533	121.332	77.0177	38.6418	31.8174	24.1954							420.78	127.79	72.438	47.1648	40.3126	22.8705	24.2053						420.026	128.936	70.4991	48.3397	37.7961	28.0567	21.802	17.8705
422.287	123.025	72.8087	32.7418	21.1807	22.328							422.287	119.141	75.015	35.0364	27.7997	22.2397							421.533	119.382	63.9894	44.2253	37.2237	27.6519	18.1687						420.78	118.98	67.8995	45.385	36.9309	28.7438	20.7347	18.599
423.041	118.537	72.405	29.788	20.5616	19.4193							423.041	110.277	70.6476	33.83	26.0096	20.6495							422.287	118.524	64.1599	41.8319	33.2714	25.5051	21.5337						421.533	116.9	63.9008	46.9728	35.8943	27.9178	21.3593	13.3828
423.795	113.367	64.9934	30.1787	19.3318	22.306							423.795	110.218	63.4189	36.0394	25.7175	22.6559							423.041	109.75	59.7517	41.4747	34.8845	22.4069	20.4737						422.287	107.933	59.1295	44.1265	32.6536	25.9464	17.2976	18.4449
424.548	100.389	65.3006	26.0332	19.8514	17.9359							424.548	102.653	63.8204	33.2598	27.5133	17.7618							423.795	104.882	58.2579	38.6637	33.4152	23.5306	19.6817						423.041	103.599	54.128	41.7383	28.9971	21.7918	17.9255	14.6743
425.302	102.618	64.1361	24.8744	20.1942	20.4542							425.302	93.7773	58.0691	26.9545	22.7076	21.1476							424.548	104.307	60.1636	37.8743	30.1253	21.1574	14.8885						423.795	96.8341	55.0214	36.6518	26.6797	21.6062	17.7573	11.984
426.055	98.4485	59.6213	22.6923	20.2764	17.7742							426.055	94.3069	58.2408	30.9755	21.1392	21.4844							425.302	93.9507	53.1289	35.7082	27.8212	16.3807	16.294						424.548	96.5578	48.5836	39.2674	24.3789	20.1126	15.3239	13.4084
426.809	91.5681	55.4906	23.3645	19.9285	16.7503							426.809	88.3039	50.1649	27.8312	20.1003	18.7259							426.055	87.5769	47.2829	32.356	23.814	22.7786	13.9778						425.302	87.1904	46.4553	33.8881	21.0609	20.8009	17.9408	12.7405
427.562	90.5585	51.3935	20.0956	18.7274	14.2807							427.562	83.2899	55.6691	28.6469	20.0956	17.2737							426.809	88.7334	44.8391	31.5248	24.8247	18.8118	15.0323						426.055	83.349	44.867	33.7365	25.6259	16.9114	17.6017	13.9778
428.316	83.3436	49.2911	21.8788	16.856	15.7493							428.316	78.8316	50.2275	25.7948	17.8776	16.7709							427.562	81.7507	46.5192	28.9035	22.49	17.5302	15.2214						426.809	80.6589	44.4097	31.6966	24.3093	16.7503	15.3759	11.9399
429.069	84.3049	49.2273	19.9112	15.8442	14.0649							429.069	81.5936	45.8381	24.8255	19.7418	16.3526							428.316	82.0666	49.4613	29.7108	21.7085	13.3656	14.6426						427.562	78.2446	41.4739	29.9296	22.2334	14.9648	12.3139	11.2877
429.823	78.7566	47.3889	20.0686	14.3347	13.7445							429.823	73.6973	46.7986	22.008	16.2741	15.5995							429.069	76.3404	44.2283	28.0451	22.8767	13.8108	12.4551						428.316	78.1506	38.5645	31.9243	20.2613	15.2385	14.7277	11.2373
430.576	77.116	45.9004	17.0343	14.3491	11.9996							430.576	72.2491	46.4878	22.4887	16.4469	11.7478							429.823	76.9858	42.3295	24.2004	22.5982	17.7919	14.1661						429.069	74.2222	39.3988	26.2659	20.6738	14.2344	14.2344	8.04921
431.329	72.9918	44.0958	18.6238	11.8591	16.87							431.329	69.7348	45.1815	23.4676	17.2875	12.1096							430.576	70.8226	38.0126	26.6843	20.8104	11.8317	14.6009						429.823	71.5892	38.1978	27.9105	18.8038	15.5152	12.4796	9.61269
432.083	69.3928	41.885	18.5324	12.0502	13.9617							432.083	65.1544	41.3863	19.8621	15.6238	13.0475							431.329	71.6556	36.3289	23.2171	20.2106	10.9404	12.6107						430.576	65.0326	36.1665	27.5235	19.7196	13.51	11.1604	7.97173
432.836	69.8812	41.7633	16.8707	12.7357	11.5779							432.836	64.423	38.9515	19.5998	16.2091	10.999							432.083	69.2265	37.3142	23.685	18.7818	14.0448	12.1333						431.329	65.8931	36.83	23.0501	18.2897	12.7777	12.5272	9.35365
433.589	66.4115	41.394	16.0474	10.7806	9.38155							433.589	61.6384	39.7481	19.0923	13.9077	13.4963							432.836	63.0998	34.1549	23.4867	17.1188	14.3897	9.01426						432.083	63.243	35.9845	22.6046	17.6183	11.053	11.6347	8.80914
434.342	63.6184	38.4003	15.5566	10.0709	11.5447							434.342	61.6534	38.7278	19.1592	15.311	11.8722							433.589	62.0499	35.798	21.3142	17.9402	12.6733	10.0399						432.836	59.5437	32.0047	21.8327	18.9382	13.48	12.4049	7.52566
435.096	60.9308	38.2039	14.2552	12.1373	10.5896							435.096	60.9308	36.5748	17.0248	14.0108	6.84249							434.342	63.2909	31.7683	22.4343	19.0773	13.8372	9.08835						433.589	58.5935	29.7082	22.6309	15.0599	14.3192	9.79302	6.33666
435.849	60.135	35.9027	13.5344	11.1841	11.0221							435.849	59.0004	35.4164	20.5853	14.0207	12.4809							435.096	59.8718	27.6958	18.491	14.7439	11.73	7.4127						434.342	54.2845	31.3589	19.7324	13.9191	13.8372	10.2346	8.02395
436.602	55.7986	33.0599	16.5299	9.83732	5.80563							436.602	56.5243	34.2694	17.8201	13.7077	11.9338							435.849	57.0553	31.6074	18.4781	15.5605	9.80639	7.05087						435.096	50.5041	28.3475	18.491	14.4181	13.3592	11.4856	6.10937
437.355	54.7888	33.13	13.4766	8.66353	7.29982							437.355	54.3877	32.3278	17.0864	11.3107	12.1931							436.602	57.0081	29.1088	19.5134	16.4493	10.9662	9.35352						435.849	52.3547	27.9604	18.4781	11.9135	10.86	8.91489	10.1306
438.108	54.2767	31.2889	12.4517	10.6957	10.2966							438.108	52.3611	30.1715	13.8086	13.1701	6.06623							437.355	51.8207	30.9641	18.2095	14.6799	8.9844	10.5085						436.602	49.5898	27.8187	20.2391	12.4176	11.2081	5.9669	9.59542
438.861	50.8249	29.939	9.60908	9.05318	8.25904							438.861	50.9043	29.0655	14.2151	12.6268	9.52966							438.108	51.6427	25.7815	16.6023	15.7243	7.74242	8.30115						437.355	49.1735	28.8784	17.7281	15.8029	9.62614	6.01634	8.34266
439.614	48.2023	28.0522	11.2999	8.2181	7.66495							439.614	46.938	28.2102	11.853	12.3271	10.4307							438.861	49.6337	26.286	16.121	13.9768	10.3238	8.65611						438.108	46.694	24.2649	17.4803	12.1325	12.6114	8.70024	8.46079
440.367	49.3848	26.8156	11.4812	9.0434	5.97651							440.367	46.4752	27.9166	13.7617	9.75114	5.26876							439.614	46.5429	24.6543	13.9866	10.7467	10.4307	7.42789						438.861	43.1217	21.2829	18.9005	12.0709	8.5767	7.94139	5.08249
441.119	45.5598	24.1107	9.70689	8.53267	6.41908							441.119	44.3073	25.9111	12.4467	10.02	7.82814							440.367	46.1607	24.1419	16.9072	13.1326	10.5375	5.58332						439.614	42.2758	20.9403	15.0928	8.6132	8.13908	7.11181	3.55591
441.872	42.3965	25.017	11.5343	9.04043	7.48173							441.872	40.6819	27.2771	11.1447	8.65075	7.94934							441.119	43.9941	23.5627	12.2119	11.5074	8.21955	6.65392						440.367	41.9142	21.1537	17.8509	9.27931	6.92017	6.21242	3.696
442.625	42.5282	24.6012	9.15753	9.85598	7.68301							442.625	42.6834	24.0579	12.1066	8.61428	6.44131							441.872	40.3702	22.2893	12.0799	13.2489	7.32586	4.13054						441.119	40.0018	20.5097	14.9517	11.4291	8.53267	6.57564	5.40142
443.378	43.4335	23.417	8.65579	7.57382	6.33728							443.378	38.4101	21.5622	13.5247	8.57851	6.10542							442.625	38.027	22.3506	12.9602	12.8826	10.0112	4.96679						441.872	40.6819	20.1072	14.1062	11.4564	6.62445	7.87141	5.53336
444.13	42.565	22.0137	8.62076	5.46495	7.92802							444.13	39.7171	23.0913	11.4687	7.6971	9.39047							443.378	39.0283	21.4849	10.5879	10.2015	8.42394	8.03752						442.625	36.2421	19.0911	13.4259	10.1664	7.6054	7.21737	2.09537
444.883	39.2487	23.4572	7.81907	6.82253	7.20581							444.883	36.259	20.3143	9.73551	7.97239	9.35223							444.13	34.7139	17.8573	13.239	9.23653	6.85042	6.69648						443.378	41.4241	21.0212	12.6746	8.96493	8.88764	6.41456	5.33259
445.636	39.7762	24.7361	9.16151	6.18402	6.33671							445.636	39.3945	22.2167	10.6884	9.77228	7.10017							444.883	36.259	19.931	12.2652	9.0456	5.82598	5.596						444.13	37.6388	18.55	12.6233	10.3141	8.00499	6.15768	4.31038
446.388	37.4872	18.4014	6.76746	6.61538	6.53934							446.388	36.2706	21.6711	9.27675	7.52785	5.93103							445.636	37.4095	18.0176	11.1465	8.39805	6.87113	6.79479						444.883	36.1057	17.6312	12.0352	8.73897	7.89573	5.67266	4.36948
447.141	37.1869	21.2064	8.48255	6.36192	7.27076							447.141	35.2178	22.6454	10.4517	8.25534	5.52881							446.388	36.8789	18.4775	12.1662	6.8435	9.42882	6.91954						445.636	34.5847	16.4144	10.4594	8.93247	5.19152	7.4819	4.42806
447.893	36.8884	19.6889	8.14713	5.95947	6.18578							447.893	36.4358	20.2924	8.97693	7.4682	7.24189							447.141	35.5207	15.8291	13.1025	8.55829	6.96781	6.28618						446.388	32.3926	16.7286	9.5809	9.5809	6.99558	6.8435	3.04156
448.646	36.2926	21.0392	9.54279	5.33494	4.58354							448.646	32.6859	20.7387	11.8721	7.81456	5.56036							447.893	34.2481	16.8223	9.65585	8.44887	5.58229	3.77182						447.141	31.5824	14.9959	11.6635	7.11929	7.19503	4.46849	3.63538
449.398	37.4997	19.3112	8.00891	8.30831	7.48496							449.398	37.1254	20.0597	9.3562	7.93406	3.51793							448.646	34.9401	17.1319	12.323	7.88971	7.21345	6.83774						447.893	31.9096	17.5767	11.3155	6.86471	6.94014	4.07356	5.20511
450.151	33.9267	18.7902	8.87313	4.9958	3.9519							450.151	32.7337	19.8341	9.24596	7.38185	7.38185							449.398	33.4578	17.7394	10.1795	8.9071	6.13767	6.66161						448.646	29.4549	14.1263	7.58915	6.98803	6.61232	5.48522	4.73382
450.903	35.1354	22.0618	6.6111	4.90261	5.42259							450.903	35.284	19.3876	10.6223	7.0568	4.60549							450.151	32.8828	17.0006	9.9916	5.44318	4.25016	7.68011						449.398	32.1105	15.5687	11.9011	7.70951	6.21252	4.79037	2.84429
451.656	34.4106	17.4643	6.80812	6.29012	7.17813							451.656	31.8946	20.6464	7.77014	7.99215	5.6241							450.903	32.387	17.2334	7.72533	8.31959	4.75405	5.57115						450.151	29.602	16.9261	10.1407	6.71077	7.75467	3.80277	1.41672
452.408	33.9886	19.5379	8.25754	7.15162	4.64487							452.408	31.3344	19.6117	9.51092	7.3728	8.405							451.656	29.8225	15.6883	11.1002	8.51015	4.14408	5.03209						450.903	31.5699	14.8564	13.0736	7.27964	5.34831	4.90261	3.41697
453.16	31.8091	17.9248	5.65659	6.17082	5.21581							453.16	31.8091	17.0432	8.22776	5.06889	5.58312							452.408	32.5141	18.2108	8.69991	7.15162	5.23469	6.63552						451.656	31.5986	13.5422	12.0622	5.4761	2.51605	4.21808	3.10806
453.912	33.1585	17.5674	7.31975	4.75784	5.19703							453.912	31.8409	15.3715	9.14969	8.05173	6.80737							453.16	29.9726	16.3086	10.5051	8.00737	5.28927	4.11388						452.408	28.0904	15.4092	12.3126	6.19316	3.24403	4.49741	3.39149
454.665	33.1885	17.2872	7.22123	6.27299	7.73182							454.665	29.4685	16.4119	8.3883	7.95065	5.90828							453.912	29.9378	14.7859	9.88167	6.66098	5.48982	3.29389						453.16	29.8256	13.3701	10.5051	7.5666	4.48119	5.28927	3.08541
455.417	29.0774	16.7195	6.6151	5.74278	5.74278							455.417	28.5685	17.3737	3.92544	7.34203	5.23393							454.665	28.9579	16.4119	9.33654	5.90828	6.92947	5.7624						453.912	31.5481	14.4199	9.58888	7.02696	4.24546	4.02586	2.70831
456.169	33.179	17.4588	5.07103	6.37501	6.23012							456.169	33.6137	15.7202	8.18609	4.70881	5.3608							455.417	31.1855	15.4837	10.9767	6.32433	5.5247	4.4343						454.665	28.9579	13.4213	8.89889	8.31536	5.90828	6.49182	2.04237
456.921	30.7525	16.3147	5.12541	5.63073	3.75382							456.921	29.5253	17.0366	7.29108	5.1976	6.56919							456.169	28.3253	14.2713	9.34518	8.11364	6.44745	4.56393						455.417	28.6412	15.1202	9.52284	7.77819	3.78006	3.70736	4.21622
457.673	29.2792	16.8337	7.05003	5.82707	6.83422							457.673	26.9052	18.9919	5.97095	5.89901	4.38828							456.921	28.4424	14.6543	9.67331	7.43546	1.2994	3.60945						456.169	28.8324	13.3296	10.2869	9.49007	3.76705	5.14347	3.1875
458.425	30.8991	13.9082	7.5993	5.59194	4.94672							458.425	26.3825	17.6361	8.96144	3.94304	5.0901							457.673	28.5598	13.1649	8.92045	7.40973	5.46737	3.09338						456.921	24.6164	12.994	10.1064	5.55854	5.34198	2.81537	2.81537
459.177	30.6499	16.3609	4.71537	4.35815	4.64393							459.177	26.5061	14.0032	7.1445	7.07306	6.21572							458.425	28.6766	14.0515	7.81438	8.53129	4.58826	4.51657						457.673	27.9124	13.8123	10.7909	5.82707	3.02144	4.38828	4.10053
459.929	26.7021	16.3773	6.55092	4.77078	5.55405							459.929	28.2687	15.7365	7.5478	4.77078	3.34667							459.177	25.7202	14.1461	9.71653	6.57294	5.35838	3.42936						458.425	24.5185	14.1232	9.17652	4.30149	3.72796	3.29781	3.22612
460.681	29.7391	12.7048	6.24591	6.10396	5.46518							460.681	25.3385	16.1116	6.67177	4.1876	4.89736							459.929	26.9158	13.9563	8.40227	8.90071	2.63461	4.41475						459.177	24.8629	12.7887	6.28716	6.57294	4.50104	5.42982	3.28647
461.433	27.0991	16.4151	7.00474	4.59907	3.53775							461.433	25.1887	15.7783	5.87266	4.52831	5.8019							460.681	29.4552	13.2726	8.23325	6.17494	7.23958	5.11029						459.929	23.5691	12.6034	6.2661	7.04936	2.84823	3.63149	4.20114
462.184	28.2863	12.9087	6.84233	5.07884	5.14938							462.184	27.8631	14.8838	8.60582	3.80913	6.13694							461.433	28.0897	14.6463	8.6321	8.77361	4.74058	3.82077						460.681	22.7124	9.22692	9.01399	5.96201	6.17494	4.61346	3.40686
462.936	27.502	14.4895	4.78296	3.79823	4.50161							462.936	25.3919	12.8014	6.89309	4.36093	2.32114							462.184	25.0415	12.415	6.41909	7.61827	6.48963	5.29046						461.433	22.217	13.1604	8.84436	6.36794	3.67925	4.66982	3.75001
463.688	26.1641	13.6783	7.43537	4.69972	4.34899							463.688	25.1119	13.8186	7.29508	6.94435	1.61333							462.936	24.8292	9.84726	8.58119	8.7922	4.57194	4.00924						462.184	26.6639	12.8382	8.0415	4.58507	2.3278	4.02075	1.83403
464.44	25.2566	15.8116	6.4366	5.03734	2.4487							464.44	26.0962	14.3424	9.79482	3.98789	4.12782							463.688	26.3745	12.4858	8.48755	6.80406	4.48928	3.08638						462.936	21.3123	12.1684	10.199	4.07958	3.37621	1.89912	3.86857
465.191	26.5195	13.9576	4.95495	5.79241	6.28093							465.191	22.4718	13.8878	6.00178	4.95495	4.6758							464.44	23.1578	11.8237	9.65489	6.57652	6.22671	1.67911						463.688	22.3061	12.8365	10.1009	7.22494	4.91015	0.491015	2.52522
465.943	24.9227	14.6891	6.3351	4.87315	5.4997							465.943	25.967	12.7398	5.70855	4.87315	4.94277							465.191	25.1237	10.6078	7.88605	7.32775	5.79241	5.02474						464.44	25.3966	9.58493	9.30508	5.03734	3.98789	4.5476	4.12782
466.695	26.529	14.7229	2.84735	2.84735	4.72243							466.695	25.6956	16.1813	7.0142	5.20857	5.34746							465.943	23.8785	10.0248	9.05015	7.30973	6.26548	3.13274						465.191	23.5186	11.0963	6.69966	6.42051	3.00089	2.58216	3.83835
467.446	26.4662	15.7966	5.47338	3.81058	4.64198							467.446	22.9328	15.3809	7.89829	4.57269	3.18703							466.695	23.3344	10.0004	8.54205	8.81984	5.20857	5.27801						465.943	22.4861	10.0944	7.24012	5.9174	3.20236	2.92389	3.20236
468.198	23.57	14.9991	3.38689	4.70017	4.07809							468.198	26.6804	16.8653	8.08706	5.52961	5.52961							467.446	24.0413	11.8474	9.35324	5.95836	2.84061	3.11775						466.695	23.6816	9.86155	5.5558	4.30575	1.94453	3.19459	2.98624
468.949	26.6887	14.827	7.24111	2.34474	3.79296							468.949	26.5507	17.3097	4.34467	4.2757	4.13778							468.198	25.2289	12.096	7.1885	4.83841	5.80609	4.21633						467.446	23.7642	10.1846	10.1154	6.72048	4.98839	2.21706	2.4942
469.701	23.1211	12.7992	6.4684	3.99114	4.54164							469.701	22.5706	13.8314	6.81247	7.08772	5.71146							468.949	23.7233	11.9306	8.55141	6.1377	4.20674	4.89637						468.198	24.8141	12.0269	8.36354	6.98114	5.52961	5.04577	2.90305
470.452	25.4062	14.6257	6.59187	7.00387	5.08124							470.452	22.8656	14.2137	6.38588	5.69922	4.73791							469.701	23.878	15.6893	7.43178	4.54164	3.57827	2.61489						468.949	24.8956	10.6203	6.27563	6.20667	3.37919	2.4137	2.75852
471.203	23.7076	15.4853	4.04263	3.08336	5.07041							471.203	21.7891	14.9372	6.57783	5.13893	4.79634							470.452	23.0029	12.3598	9.13249	5.1499	4.87524	4.53191						469.701	20.4374	12.1799	6.74365	6.39959	5.3674	4.33521	3.92233
471.955	23.5228	14.2915	5.74393	3.07711	6.15421							471.955	21.7449	13.4709	3.35063	3.69253	4.30795							471.203	23.0224	10.6205	6.78339	6.23524	4.59078	2.8778						470.452	23.2776	12.0851	6.86653	6.24855	6.79787	4.73791	2.47195
472.706	23.2702	13.9212	4.29919	2.52492	3.20733							472.706	18.4251	12.3516	5.45929	5.45929	4.84512							471.955	22.4971	9.9835	7.31668	6.01745	6.49611	3.89767						471.203	19.665	11.1686	7.46858	6.23524	1.71298	1.57594	3.56299
473.457	23.2254	12.8727	5.99365	3.74603	3.33738							473.457	20.4329	13.1452	6.60664	5.10823	4.69957							472.706	22.7925	9.28079	7.57476	5.25457	2.79788	2.72964						471.955	21.6081	9.57322	8.00048	3.55577	6.01745	2.0514	4.44471
474.209	24.2023	13.5968	3.87508	5.43871	4.48694							474.209	21.6869	13.5968	4.28299	4.89484	2.1075							473.457	21.5908	9.8078	6.67475	5.99365	3.26927	5.04012						472.706	22.2466	12.0104	6.4829	9.28079	4.02623	3.4803	4.36743
474.96	24.4332	11.6058	6.10831	3.59712	2.23971							474.96	21.7184	12.6917	6.85488	6.17618	2.57906							474.209	22.5027	11.1494	4.55492	6.93436	6.86637	4.48694						473.457	19.9561	10.8976	7.49207	4.15469	4.42713	1.63463	2.65628
475.711	23.9869	13.6197	5.28524	5.55628	2.5071							475.711	22.0219	11.1126	6.30164	3.59126	4.94645							474.96	18.6643	11.1986	6.5834	8.28015	3.93647	3.52924						474.209	19.3754	11.2853	8.09008	4.89484	3.8071	4.28299	2.85532
476.462	23.2078	12.3143	3.45072	3.92434	1.96217							476.462	20.2307	12.4496	5.95418	3.58604	4.39797							475.711	18.7694	12.129	4.47213	4.60765	3.59126	3.93005						474.96	18.5285	8.48376	6.44766	4.14008	2.7148	2.30758	3.05416
477.213	23.4436	13.377	4.6617	4.9995	3.98609							477.213	21.8897	12.2285	6.62096	5.74267	3.31048							476.462	18.8098	10.3521	6.90143	5.41289	5.14224	2.57112						475.711	19.718	8.60546	7.72459	4.13333	3.5235	1.49071	2.57486
477.964	23.746	9.44444	3.23809	3.37301	3.91269							477.964	20.9801	10.5913	4.99206	4.11508	5.32936							477.213	21.6195	10.5395	6.01292	5.81023	3.37804	5.81023						476.462	19.6894	8.38998	7.57804	5.34523	3.85668	1.62387	2.23282
478.715	20.2054	11.1803	3.97373	5.52281	2.42465							478.715	20.1381	13.4703	3.77168	3.70432	3.36757							477.964	21.0476	10.9286	6.34126	3.77777	4.25	2.36111						477.213	20.5385	10.5395	7.56682	6.14804	3.17536	5.33731	3.64829
479.466	20.7095	10.3548	5.78253	3.76537	3.02574							479.466	19.7682	11.4306	6.32044	6.79111	4.43775							478.715	20.6095	11.2477	8.21687	5.2534	2.492	2.69405						477.964	18.8889	7.55555	5.73412	5.32936	4.9246	5.39682	3.37301
480.217	21.5442	11.4768	4.76524	2.21483	1.54367							480.217	18.3227	11.3426	5.63774	2.9531	3.3558							479.466	18.4234	10.153	5.91701	6.99282	4.43775	3.89985						478.715	17.7134	8.48627	7.94746	5.72487	4.04108	2.2226	2.89611
480.968	19.4941	11.7903	4.89028	2.74659	2.47863							480.968	22.7096	13.1301	6.96697	4.89028	4.55533							480.217	20.5375	8.25527	4.83235	2.01348	5.10082	4.96658						479.466	19.9027	9.34618	6.58939	3.76537	3.2947	2.75679	1.41201
481.719	21.3293	12.9714	3.47688	3.87806	3.47688							481.719	20.5938	11.3667	5.21532	6.08454	4.14551							480.968	20.164	11.5893	5.89513	4.82329	5.09125	3.48348						480.217	17.3159	10.0003	7.9868	2.75176	4.96658	2.75176	-0.201348
482.47	19.1545	11.9465	3.40375	5.27248	4.4716							482.47	16.6183	10.545	5.73967	4.1379	3.87094							481.719	21.2625	9.49456	6.01768	4.21237	1.87217	5.75023						480.968	16.6135	10.1155	6.16309	5.69416	5.09125	3.68445	2.6796
483.22	20.1861	11.1923	4.13049	3.99725	3.13118							483.22	18.5872	10.6593	4.19711	3.86401	3.13118							482.47	18.0866	9.74408	5.27248	4.07116	4.00442	3.40375						481.719	17.6519	9.82888	5.28219	5.01473	3.27629	5.14846	2.34021
483.971	20.1519	11.9049	2.79333	1.99524	3.92397							483.971	18.1567	10.9073	5.38714	4.32302	3.52492							483.22	18.454	8.99381	6.3956	4.53022	3.33104	3.46428						482.47	17.8197	9.21016	7.00773	5.67293	4.93878	1.73525	1.26807
484.722	18.194	9.761	4.9801	4.11688	4.05048							484.722	17.1979	11.2882	6.57373	4.58169	1.52723							483.971	17.6911	10.7078	6.58429	6.38476	2.99286	3.72444						483.22	16.9217	8.46085	6.19574	4.13049	4.59684	2.53159	3.06456
485.472	19.0961	11.272	5.30447	2.78485	1.52503							485.472	20.0244	9.28282	4.84033	4.64141	2.58593							484.722	17.1315	6.64013	4.7809	6.04252	2.72246	3.98408						483.971	16.893	9.57714	6.51778	4.58905	3.3919	3.65794	0.266032
486.223	17.8781	9.33635	6.82017	3.31076	2.97969							486.223	17.6133	10.8593	2.97969	4.70128	4.43642							485.472	17.2395	7.62517	5.17186	4.64141	2.2544	5.30447						484.722	18.0612	6.83934	2.85526	4.31609	3.18727	4.8473	3.45287
486.974	17.3269	12.1024	3.90185	2.31466	2.57919							486.974	17.3269	9.9861	4.82772	3.04212	3.50505							486.223	16.3552	9.535	6.48909	4.10535	2.91347	4.83371						485.472	16.2449	8.81868	6.96211	4.11096	2.91746	2.51962	3.84574
487.724	19.0251	9.7107	4.95444	4.75626	2.51025							487.724	16.1845	10.8337	3.50114	5.48291	3.5672							486.974	15.0122	7.20851	5.42291	4.82772	4.95998	1.12426						486.223	14.8984	5.89316	4.96614	3.84049	3.50941	1.7216	4.10534
488.475	19.3374	9.43773	3.69589	4.88386	3.03591							488.475	18.9415	9.43773	6.46781	4.81786	3.10191							487.724	14.3348	8.32346	7.33257	5.87927	1.51936	0.198178						486.974	14.8799	7.53917	4.89385	2.51306	2.97599	1.25653	1.32266
489.225	17.8695	11.0778	3.0332	3.36289	5.60482							489.225	17.0123	7.84675	4.2201	2.37381	2.7035							488.475	17.6215	7.85377	6.26982	6.59981	4.42187	6.53381						487.724	13.41	7.06833	3.10478	3.17084	4.82232	2.51025	3.17084
489.976	16.5378	10.8715	5.20514	3.75561	3.22851							489.976	17.2626	8.6972	4.8757	5.20514	3.42617							489.225	18.2651	6.59391	4.94543	6.0664	3.16508	4.2201						488.475	17.2255	8.77775	5.47784	5.01586	3.76189	2.57393	0.923973
490.726	17.0526	10.4686	3.09448	3.16032	2.83112							490.726	17.0526	8.03248	6.97904	2.6336	2.43608							489.976	17.9874	6.25935	5.46869	3.36028	4.74392	2.96495						489.225	14.7044	6.33015	7.45112	2.90132	4.48386	3.09914	0.857208
491.476	16.778	10.2642	0.592165	3.22401	2.76344							491.476	16.778	7.76395	1.7765	4.07936	5.0663							490.726	13.2338	12.2462	4.14792	6.9132	4.08208	3.35784						489.976	17.4603	7.51121	6.65467	4.01916	1.77897	2.83318	3.75561
492.227	18.9379	10.3238	1.84118	2.69601	4.53719							492.227	14.7294	10.8498	5.39203	4.66871	3.87963							491.476	17.2386	9.01407	6.51382	3.75038	4.27675	4.21095						490.726	15.8674	6.45232	6.32064	3.6212	3.02864	3.55536	0.6584
492.977	17.4832	10.0561	3.22058	4.5351	4.33793							492.977	16.6287	9.53029	5.91535	4.20647	4.66656							492.227	18.2803	8.41683	6.70716	5.72081	3.48509	2.89328						491.476	16.6464	7.56656	8.15872	2.96083	1.25013	1.11854	2.10548
493.727	16.4256	9.13265	4.66488	3.08802	4.20496							493.727	14.126	8.73844	3.48224	5.1248	2.4967							492.977	15.117	10.9763	3.74639	5.19237	3.68066	2.49759						492.227	14.2691	8.02229	8.02229	3.74812	3.6166	3.15631	2.36723
494.477	16.3552	8.01339	4.66353	3.34986	3.34986							494.477	14.9102	9.78685	7.35656	3.54691	4.86058							493.727	13.7975	8.47563	4.07356	5.38761	2.82521	2.95662						492.977	13.2767	6.57261	5.98108	4.99519	3.94357	4.2722	3.28631
495.228	17.6649	8.93096	2.69242	4.0058	1.70739							495.228	17.6649	9.58765	5.31917	5.0565	2.42975							494.477	15.8954	10.0496	3.87533	6.43699	2.62734	1.51072						493.727	14.5203	8.54133	7.09588	4.59918	3.21943	1.24835	1.57686
495.978	15.1652	9.58495	2.49471	4.66118	2.16646							495.978	17.5286	10.1758	4.33292	2.62601	2.42906							495.228	16.9426	7.48624	3.41478	6.17287	4.79382	0.262675						494.477	14.1876	8.99865	6.17425	5.9772	4.4008	2.36461	1.77346
496.728	16.9346	9.51748	4.46337	1.18148	0.984567							496.728	15.4905	8.20472	4.20082	4.20082	2.88806							495.978	14.5744	7.02459	5.84288	5.51463	3.15122	3.21687						495.228	16.1545	8.2086	3.41478	6.96089	2.42975	4.59682	1.9044
497.478	17.721	9.25431	1.70647	1.83773	2.69097							497.478	15.8176	8.79488	3.80674	2.42844	3.01914							496.728	17.8535	8.53291	5.18539	5.51358	1.37839	1.83786						495.978	13.6553	9.1254	5.12073	4.39857	1.24736	3.41382	4.13597
498.228	13.7177	9.32016	2.36286	4.06937	1.77214							498.228	14.571	8.72945	5.38207	3.34738	4.33191							497.478	11.092	8.59797	4.92251	4.3318	2.3628	3.80674						496.728	14.5716	7.74526	5.11975	4.98847	2.9537	2.82242	2.49424
498.978	16.2139	6.89256	2.82267	4.06989	5.44841							498.978	15.2949	10.9625	4.66068	4.39811	1.90366							498.228	13.2583	6.49786	5.71024	4.20064	3.87246	0.39381						497.478	13.783	7.35094	6.76024	3.41294	2.49407	2.3628	3.41294
499.728	15.4957	10.5056	3.61129	2.88903	3.21733							499.728	15.7583	9.06105	4.66184	1.96979	2.03545							498.978	14.2446	8.07414	5.64534	3.08524	3.54475	2.75703						498.228	12.405	10.2391	3.60992	2.55976	2.16595	1.3127	1.77214
500.478	14.5118	9.45565	3.74286	1.77293	3.08622							500.478	13.7238	8.73334	5.25314	2.82356	1.96993							499.728	13.9855	6.69729	2.88903	5.44976	2.29809	2.36375						498.978	11.0281	6.56435	5.44841	5.44841	4.06989	2.42881	1.9693
501.227	15.6252	7.35304	2.95435	2.82304	1.51							501.227	15.2313	8.33782	4.13608	3.87348	3.41391							500.478	14.9058	7.55139	5.5158	1.96993	2.62657	1.77293						499.728	13.0663	7.55087	5.84372	4.7275	1.18188	2.62639	3.47997
501.977	14.5706	8.46672	5.05378	2.95351	0.525068							501.977	14.8988	5.31631	3.28167	2.55971	3.01914							501.227	15.0343	8.14087	3.47956	6.04	2.69174	4.72696						500.478	11.4256	7.3544	5.25314	4.85915	3.87419	1.31329	1.8386
502.727	15.6776	8.39635	3.21423	3.739	0.91835							502.727	14.8248	9.90506	4.59175	4.00138	4.19817							501.977	12.6016	7.67912	5.90702	5.05378	2.75661	3.87238						501.227	13.2617	4.92391	4.07043	0.262609	1.24739	0.196956	1.44435
503.477	13.3718	9.3078	2.62191	4.06397	1.70424							503.477	16.1903	9.70108	4.78499	2.81856	4.39171							502.727	14.7592	8.06836	4.00138	3.21423	2.55826	2.88624						501.977	13.3892	4.79125	6.36645	2.75661	2.75661	3.15041	2.23154
504.226	13.6888	8.38355	1.50642	3.7333	4.71575							504.226	13.6888	8.25256	5.37071	4.19178	2.68536							503.477	15.076	8.58677	4.26061	2.8841	2.8841	2.8841						502.727	12.1353	7.67478	5.18212	3.21423	3.6078	1.11514	1.8367
504.976	15.5094	10.7977	4.18819	2.15954	5.95509							504.976	13.3499	7.52566	5.69332	3.53379	3.27203							504.226	12.8373	6.94263	2.68536	2.22688	4.12628	2.09589						503.477	13.1751	3.67068	4.12951	3.67068	3.08075	1.37651	-0.589931
505.726	13.1396	8.23677	3.8569	2.02651	1.83039							505.726	10.8516	11.1785	5.16432	3.20319	3.59542							504.976	14.9204	5.1698	4.31907	4.44995	3.53379	3.0757						504.226	11.5929	7.40111	5.10873	1.24443	1.17894	3.01284	1.30993
506.475	10.5777	9.59831	3.33003	3.19944	1.89355							506.475	14.0383	7.11712	3.52591	1.69766	3.91768							505.726	14.447	9.28271	3.59542	3.46467	2.09188	1.96114						504.976	12.8918	7.06757	5.75876	3.73011	2.55218	1.04705	3.46835
507.225	13.3018	7.30294	2.80381	4.1079	1.89094							507.225	14.1494	6.97691	5.21638	2.80381	2.54299							506.475	12.0142	7.50889	4.24415	4.17886	-0.195884	3.7218						505.726	12.4205	8.629	6.14489	2.68022	3.33393	1.69965	4.11839
507.974	13.1499	7.68162	1.88786	0.455689	2.60394							507.974	13.866	6.96553	2.86433	4.94748	3.05963							507.225	11.8021	8.28101	4.43393	2.54299	3.26024	2.02135						506.475	12.9283	6.72535	5.22357	5.55004	2.22002	3.39532	2.28531
508.724	12.1506	7.47227	5.00317	2.59905	3.05389							508.724	14.3598	9.09668	2.98891	3.50872	3.89858							507.974	15.4283	4.42669	4.49179	3.77571	3.971	0.911378						507.225	13.1062	5.86843	4.43393	4.30352	0.847662	2.34737	3.65147
509.473	11.152	8.03978	1.16707	1.7506	4.86277							509.473	12.6432	7.45625	6.09467	2.59348	2.85283							508.724	13.5151	5.06815	3.44374	4.61332	2.92393	5.32806						507.974	13.866	8.78829	3.84081	4.49179	3.51532	2.86433	2.99453
510.223	14.3594	8.14991	4.85114	2.00514	3.49282							510.223	12.2249	9.44355	3.10473	2.65196	2.00514							509.473	12.7729	6.35402	4.47375	2.85283	2.9825	2.07478						508.724	14.1648	7.4073	1.75436	4.35341	5.13313	2.14422	4.22346
510.972	13.5487	9.09695	3.54846	3.87104	2.45166							510.972	13.8712	7.35498	3.80653	1.29035	1.80649							510.223	10.6078	8.79673	3.75155	2.00514	3.04005	2.65196						509.473	10.6333	7.00239	2.85283	2.72315	1.94511	1.68576	2.91766
511.721	12.354	6.24135	3.0885	2.83113	0.321719							511.721	12.0966	8.42904	3.86063	4.56841	2.059							510.972	11.7422	7.09691	5.9356	1.41938	2.38714	1.74197						510.223	11.3193	4.91582	3.36346	5.30391	3.04005	1.423	0.970228
512.471	10.2673	6.60956	2.31014	1.0909	2.50265							512.471	14.1817	7.25126	1.60426	3.52937	0.834216							511.721	12.4184	5.08316	5.40488	3.73194	3.53891	2.70244						510.972	11.0325	5.29043	6.45174	3.48394	1.61294	3.35491	2.5807
513.22	12.6719	7.03994	3.32797	2.23998	2.43198							513.22	11.3279	5.95195	4.54396	2.68798	2.49598							512.471	13.0266	7.31543	3.9144	3.72189	3.27269	2.50265						511.721	10.7454	6.7561	2.83113	1.35122	1.28688	3.34588	4.31104
513.969	12.2568	6.12842	2.68118	1.91513	2.74502							513.969	11.7461	7.46901	3.8941	1.40443	0.702215							513.22	9.91991	6.91194	3.00797	1.53599	1.66399	3.83997						512.471	9.5614	5.77534	4.94113	3.59355	4.49193	3.33686	3.33686
514.718	13.0528	8.21372	2.03751	2.86525	2.41954							514.718	9.48716	6.49457	3.11994	2.61056	2.2922							513.969	11.4269	6.83063	6.44761	4.34096	3.19189	3.3834						513.22	12.7359	5.31195	3.71197	1.34399	2.49598	2.04798	2.62398
515.467	10.8606	8.70121	2.47699	1.96889	1.33376							515.467	10.2255	6.41476	3.36616	5.71612	1.84186							514.718	11.2063	6.49457	3.11994	4.45706	3.4383	1.78282						513.969	10.0864	4.85166	4.46864	3.63875	0.638377	3.12805	2.93653
516.216	13.3668	7.34856	2.15389	0.886896	0.633497							516.216	11.1495	10.1993	2.78739	4.81458	3.92768							515.467	11.6863	5.97018	4.44588	2.28645	2.66752	1.14322						514.718	10.0602	3.88401	4.90276	3.94768	3.37463	3.31096	0
516.965	13.523	6.6351	3.41234	2.84361	4.86574							516.965	9.41552	7.45658	2.02212	2.52766	4.23382							516.216	10.0093	6.20827	4.94128	4.37113	4.68788	4.30778						515.467	9.90795	5.90666	4.95397	2.98509	1.33376	1.58781	2.09591
517.714	10.967	7.50039	4.15988	3.40354	1.95388							517.714	11.5342	6.74405	2.96234	0.756342	2.39508							516.965	9.66828	6.44552	3.6651	4.29702	2.02212	2.46447						516.216	10.1993	3.67428	4.81458	1.0136	1.83714	4.18108	-1.26699
518.463	10.2487	7.1049	3.52101	2.76651	2.76651							518.463	10.8145	7.73365	3.14376	3.08088	1.82338							517.714	10.2736	6.36588	5.16834	3.65565	2.96234	1.95388						516.965	10.4898	5.43446	5.8768	3.72829	2.97	3.28595	3.41234
519.212	10.0984	6.27229	0.43906	0.940844	3.26159							519.212	11.6037	8.90665	4.51605	4.76694	3.26159							518.463	10.3115	4.58989	3.58389	4.02401	1.06888	2.76651						517.714	10.4627	8.00462	3.02537	2.96234	1.19754	1.38663	2.07994
519.961	11.2636	6.195	3.00364	2.25273	0.938637							519.961	12.7655	6.44531	3.31652	2.69076	5.25637							519.212	11.0392	4.89239	3.95154	2.57164	-0.062723	0.313614						518.463	10.8145	6.09889	4.84139	3.83539	2.13776	0.251501	1.44613
520.71	12.1116	7.42928	4.55746	1.56077	1.49834							520.71	8.67789	4.18287	3.18398	3.68342	3.55856							519.961	7.94713	5.63182	1.56439	3.37909	4.75576	1.00121						519.212	8.78121	5.77051	5.26872	2.82253	1.56807	4.3906	0.752675
521.459	10.2787	6.7279	3.42624	1.74427	3.23936							521.459	9.65578	5.60658	2.6787	2.11804	1.3705							520.71	8.55303	6.0558	3.99558	3.55856	3.4337	1.24862						519.961	9.8244	5.13122	3.69197	5.00606	1.56439	2.12758	2.56561
522.208	10.4441	5.34636	2.05151	1.98934	2.36235							522.208	8.14388	6.46537	4.53819	2.85968	1.61634							521.459	10.6525	5.73117	3.61313	1.99345	2.36722	2.99018						520.71	7.49171	4.37016	2.6221	4.74475	2.18508	1.18619	3.99558
522.956	10.2389	6.6398	2.48217	4.03352	1.73752							522.956	11.5421	6.76391	3.22682	1.11698	2.42011							522.208	9.44938	6.2167	2.42451	1.86501	1.49201	2.23801						521.459	9.90496	4.29838	4.98363	4.42297	3.61313	0.93443	1.24591
523.705	10.4711	5.20458	2.78817	2.04466	1.61094							523.705	10.8429	4.46107	3.53168	2.23053	2.35445							522.956	10.1769	5.8331	4.03352	3.41298	1.73752	2.9786						522.208	8.45471	4.60036	3.54352	4.04085	1.74068	1.11901	1.24334
524.454	8.60147	6.8688	1.48515	-0.061881	0.928217							524.454	9.03464	5.50742	4.76485	1.73267	1.42327							523.705	8.61234	6.01005	4.21323	5.26654	2.04466	1.17723						522.956	8.25321	6.32953	3.41298	4.71612	1.4893	2.35806	2.10984
525.202	10.1396	5.68808	3.46231	0.247308	1.11289							525.202	9.58319	6.49184	2.2876	1.54567	2.47308							524.454	8.53959	4.5792	3.65098	1.98019	2.16584	2.53713						523.705	9.23193	4.95674	2.54033	1.3631	0.433715	0.991348	4.21323
525.951	8.28027	5.00524	2.71889	3.33683	4.26372							525.951	7.60055	6.92082	1.7302	2.34814	2.22455							525.202	8.09934	5.5026	1.05106	3.15318	2.90587	3.64779						524.454	9.22028	7.30197	4.08415	1.54703	3.15594	0.371287	0.804454
526.699	9.20467	6.98072	2.28572	2.90349	2.96526							526.699	9.94598	6.91895	3.3977	2.71816	2.47105							525.951	8.77461	2.71889	3.08965	3.02786	2.16276	1.17407						525.202	7.91386	3.8951	3.33866	1.54567	2.9677	1.36019	1.17471
527.448	9.88472	7.10464	2.28584	0.679574	2.47118							527.448	8.64913	4.44812	3.52143	2.84186	2.03872							526.699	9.6371	6.91895	4.38612	2.84171	2.53283	1.79151						525.951	7.1062	5.25241	5.93213	1.97738	0.370758	2.78069	0.988689
528.196	9.64191	5.2536	3.33758	1.42156	0.556264							528.196	11.0635	4.14108	3.58481	0.556264	3.64662							527.448	10.2554	5.68371	3.58321	2.28584	0.741354	2.1005						526.699	8.71046	3.52125	5.25099	0.864868	1.23553	2.16217	2.65638
528.945	7.85501	6.30875	0.927757	2.96882	1.29886							528.945	10.2672	5.8758	3.46363	2.96882	3.33993							528.196	10.8162	6.18071	3.58481	3.33758	2.41048	2.78132						527.448	8.83447	5.31304	4.38635	1.60627	0.494236	2.4094	1.66805
529.693	8.35834	3.90056	2.47654	3.34333	2.78611							529.693	8.04877	4.89117	4.82926	1.73358	3.46716							528.945	8.41167	4.94804	4.70064	0.989608	0.742206	1.66996						528.196	8.83841	5.31541	4.57372	2.34867	0.618071	1.60699	2.10144
530.441	10.85	3.72001	1.488	3.10001	2.91401							530.441	9.98202	7.00602	4.46401	3.28601	2.23201							529.693	9.53469	3.90056	4.58161	2.84803	2.41463	3.77673						528.945	8.28797	5.38099	6.1232	2.72142	1.85552	3.52548	2.53587
531.19	8.63293	4.65806	3.78855	1.11793	0.993718							531.19	8.50871	4.90648	4.78227	2.91905	1.6769							530.441	7.62602	3.10001	4.09201	2.23201	1.86	3.84401						529.693	10.0919	4.02438	4.14821	2.16698	2.7242	2.04315	1.17636
531.938	9.64684	3.04964	1.68042	1.80489	2.42727							531.938	8.33985	5.22796	1.99161	3.36083	3.2986							531.19	7.51499	3.72644	2.04954	4.09909	2.67062	3.72644						530.441	7.99802	6.63402	3.22401	2.91401	1.054	2.17001	1.736
532.686	10.3563	5.67723	2.68264	0	1.99639							532.686	9.54523	5.3029	3.18174	3.80561	4.42948							531.938	8.65103	4.66782	3.2986	4.48111	5.22796	2.61398						531.19	8.75714	5.8381	4.72016	1.80112	1.98744	3.04326	1.92533
533.434	9.75839	3.75323	2.94003	1.93917	2.81492							533.434	8.06944	4.8792	4.62898	2.31449	2.75237							532.686	8.2351	5.17813	2.37071	2.93219	1.12297	3.30652						531.938	11.0161	4.10769	0.248951	3.73426	2.92517	2.30279	2.92517
534.182	9.15895	4.26581	2.63477	3.45029	4.51674							534.182	9.91174	4.83041	3.13663	3.19936	0.564593							533.434	8.63242	5.8175	4.31621	2.06427	3.31535	2.00172						532.686	7.98555	4.61665	1.99639	1.934	0.43671	1.12297	3.68084
534.931	9.06116	7.04757	3.14624	1.95067	1.82482							534.931	8.87239	5.97785	2.39114	1.69897	2.45406							534.182	7.7161	4.20308	1.56831	4.01488	2.8857	2.76023						533.434	7.88178	4.94175	2.50215	4.44132	4.69154	1.00086	2.50215
535.679	8.33249	7.19624	3.72437	1.515	1.70437							535.679	8.45874	6.50186	4.16624	3.21937	2.71437							534.931	8.74654	4.65643	3.02039	3.52379	1.82482	2.70576						534.182	5.83413	4.01488	3.88942	3.82669	2.5093	2.00744	3.13663
536.427	8.17144	5.57432	2.91385	1.52027	2.72381							536.427	8.6782	4.5608	3.29391	1.96368	0.950167							535.679	8.14311	2.08312	3.78749	1.95687	1.07312	0.946873						534.931	7.1105	4.21596	3.46086	3.52379	3.39794	0.818022	3.46086
537.175	9.91987	3.17944	2.67073	2.92509	3.94251							537.175	9.09321	5.97736	3.81533	1.97126	0.826656							536.427	7.34796	3.54729	3.61064	3.67398	3.4206	1.45692						535.679	7.13311	3.53499	2.33562	1.64125	0.820624	-0.504999	2.71437
537.923	8.42976	6.13073	2.23516	0.957927	3.44854							537.923	9.64313	5.93915	1.21337	2.74606	1.91585							537.175	6.61325	5.1507	2.92509	3.81533	2.54356	2.22561						536.427	8.74154	4.62415	1.07686	4.05405	1.77365	1.20355	2.21706
538.67	9.68759	5.64575	2.50209	2.88703	3.65691							538.67	8.46862	4.68341	3.20781	1.53975	1.79638							537.923	6.57777	4.02329	1.97972	2.29902	2.87378	-0.191585						537.175	8.33015	5.08711	3.24303	0.953834	2.09843	1.33537	1.58972
539.418	9.4766	6.05987	-0.838066	1.1604	2.5142							539.418	10.8304	5.28627	1.86953	-0.128933	2.06293							538.67	9.04603	4.94003	3.0795	4.04184	3.14366	3.46444						537.923	7.40797	5.49212	1.66041	4.40646	1.72427	1.21337	2.10744
540.166	9.97587	7.12562	2.78547	3.17414	-0.129557							540.166	9.39287	6.73695	3.04459	0.647784	2.78547							539.418	8.1228	4.19033	2.57867	2.06293	3.15887	1.41827						538.67	5.32497	4.74756	4.55509	2.82287	2.95119	1.47559	1.47559
540.914	9.0458	5.85699	1.82218	0.325389	2.21264							540.914	8.72041	6.44269	3.18881	0.260311	0.520622							540.166	6.6074	6.08917	4.08104	3.04459	2.65591	3.04459						539.418	9.2832	3.73907	5.54413	2.3208	2.64313	2.7076	0.3868
541.662	10.1301	3.98668	2.28744	2.15673	0.326777							541.662	8.03871	4.96701	3.00635	3.20241	3.6599							540.914	5.5316	4.68559	2.9285	3.12373	0.911088	1.82218						540.166	7.38474	4.72882	3.69237	2.65591	0.518227	0.647784	0.323892
542.409	8.59539	7.34873	3.47753	3.01823	0.131227							542.409	6.10207	4.39612	3.08384	1.96841	1.50911							541.662	7.38516	4.44417	4.31346	4.96701	0.718909	1.63389						540.914	8.06963	2.9285	3.38404	3.25388	0.195233	2.53803	1.36663
543.157	8.62598	4.80684	2.17296	2.43635	1.84372							543.157	8.49428	2.63389	1.90957	3.09482	1.97541							542.409	9.05469	4.72419	3.54314	1.9028	3.93682	0.393682						541.662	7.77729	4.77094	1.7646	3.46384	1.7646	1.43782	3.26777
543.905	6.73718	6.40693	2.57598	0.132102	1.78337							543.905	9.51131	5.01986	4.22725	4.75566	2.11363							543.157	8.29674	5.59701	2.3705	1.38279	1.64618	1.64618						542.409	6.16769	4.3305	2.75577	2.16525	1.77157	3.14946	2.75577
544.652	8.80979	7.22005	3.31195	2.18589	2.91452							544.652	7.22005	4.10682	3.04699	2.11965	1.85469							543.905	5.01986	2.64203	2.70808	4.2933	1.25497	1.32102						543.157	7.11149	3.62159	4.01668	3.81914	1.84372	2.43635	0.592624
545.4	8.10332	4.71587	2.12546	3.98524	4.05166							545.4	7.97048	4.58303	1.52767	2.85609	2.59041							544.652	9.3397	3.31195	2.78204	2.45084	1.85469	2.3846						543.905	10.2379	2.44388	4.09515	2.24573	5.28406	0.79261	1.91547
546.147	8.85703	7.05898	0.732536	2.13101	1.86464							546.147	7.52515	4.595	2.79696	2.13101	5.79369							545.4	7.30627	5.18081	4.25092	3.12177	2.45756	1.32841						544.652	6.35894	3.84186	1.98717	4.30553	0.397434	4.30553	0.728629
546.895	8.21238	6.14259	2.13655	1.40211	0.534138							546.895	6.40966	5.54169	0.801208	2.40362	1.40211							546.147	5.7271	6.06007	3.59609	1.66485	0.932319	2.3308						545.4	6.64206	4.58303	1.26199	4.11808	2.19188	2.65683	0.597786
547.642	8.43581	4.61961	3.74925	2.27633	0.200853							547.642	8.77056	4.88741	3.07974	4.2179	2.94584							546.895	7.47794	4.54018	3.8725	3.4719	1.93625	3.0713						546.147	5.59391	4.99456	1.73145	4.72819	0.066594	1.73145	3.72927
548.389	5.63873	4.56468	3.75915	0.201383	1.2083							548.389	6.98128	4.90032	4.96745	3.155	2.88649							547.642	7.29764	4.41876	-0.602558	2.87889	1.13816	1.60682						546.895	5.74199	5.27462	3.00453	3.53867	3.60543	1.66918	2.27009
549.137	8.14035	3.09468	2.89285	2.89285	2.62375							549.137	6.92939	4.57474	0.403654	2.42192	1.48006							548.389	6.84703	4.76607	5.5716	3.69202	2.81936	2.34947						547.642	6.42728	2.87889	2.74498	4.28485	1.94158	1.60682	1.94158
549.884	8.82753	5.25609	4.04314	0	1.68464							549.884	9.16446	4.64962	0.4717	0.336929	3.50406							549.137	5.04567	4.57474	4.03654	4.84385	2.2201	0.336378						548.389	4.76607	4.56468	3.82628	2.68511	2.14809	-0.067128	1.47681
550.631	6.00393	5.73409	5.39679	0.742059	1.95634							550.631	8.36503	2.6984	1.88888	2.0238	2.3611							549.884	6.40165	3.90837	2.08896	1.54987	2.89759	0.808629						549.137	6.18936	4.57474	4.30564	1.81644	1.61462	2.7583	1.27824
551.378	6.3444	6.00693	3.77964	0.202481	1.88982							551.378	8.09923	5.46698	1.28238	3.50967	1.82233							550.631	6.88091	3.0357	3.37299	2.96824	3.30553	2.90078						549.884	4.2453	3.57145	4.717	1.4151	0.943401	1.61726	0.741243
552.126	7.89635	3.23953	1.82224	1.88973	0.674902							552.126	6.95149	3.64447	2.56463	2.7671	3.64447							551.378	6.95184	4.2521	1.28238	1.82233	1.82233	1.0799						550.631	5.53171	3.30553	4.31743	0.674599	0.06746	1.75396	1.75396
552.873	6.94915	3.17097	2.96857	2.02402	2.36136							552.873	4.85766	5.3974	2.29389	1.34935	0.404805							552.126	5.87165	1.95722	2.0922	2.83459	2.7671	2.42965						551.378	7.55928	3.1722	4.85954	1.21488	0.404962	1.21488	2.15979
553.62	7.82253	4.31588	1.07897	4.99023	3.70896							553.62	8.29458	4.51818	0.876663	1.75333	2.29281							552.873	8.2985	3.77818	4.52032	3.98058	3.77818	3.1035						552.126	6.74902	3.64447	3.442	1.01235	0.539922	2.22718	2.42965
554.367	5.86293	4.0434	1.01085	0.943459	3.90862							554.367	8.6933	5.59337	0.876069	-0.13478	1.81953							553.62	6.74356	4.38331	4.9228	2.42768	3.30434	3.16947						552.873	6.67928	5.26246	2.63123	1.88909	3.1035	-0.53974	1.01201
555.114	6.12701	3.1645	1.95256	-0.269319	2.76052							555.114	4.84775	5.58837	3.56848	4.30911	1.21194							554.367	6.94116	4.38035	4.7173	2.56082	3.43689	0.60651						553.62	5.32741	3.0346	1.82076	3.64152	0.202307	2.49512	1.1464
555.861	6.32239	4.43912	1.21067	1.00889	2.01778							555.861	6.45691	3.63201	3.69927	-0.470816	2.95942							555.114	7.94492	4.24178	2.89518	2.76052	1.00995	3.23183						554.367	8.08679	3.30211	2.76299	2.22387	1.14563	2.49343	-1.48258
556.608	8.12838	4.36648	0.940473	2.68707	1.34353							556.608	8.39708	3.29166	2.48554	3.56036	2.8886							555.861	6.59143	4.43912	3.43023	1.61423	1.41245	1.74875						555.114	6.26167	4.57843	2.62586	2.96251	1.00995	2.76052	2.76052
557.355	8.18351	4.02468	1.2074	-0.402468	0.134156							557.355	7.51273	4.22591	2.34773	2.88435	3.01851							556.608	5.50849	4.97107	4.76954	4.0306	1.27636	3.09013						555.861	7.33128	3.09394	2.4886	5.78431	2.08504	2.95942	0
558.102	7.70063	4.28557	1.00443	3.28114	3.48202							558.102	5.29	2.54456	1.47316	3.3481	1.9419							557.355	7.84812	4.89669	1.34156	1.94526	1.87818	1.8111						556.608	6.71767	4.76954	2.28401	5.77719	1.27636	2.68707	1.00765
558.848	6.5491	5.14572	0.200482	2.87358	4.54427							558.848	7.08371	4.00965	1.26972	2.53945	1.13607							558.102	5.22304	3.08025	5.22304	0.937468	1.47316	4.7543						557.355	4.5613	6.70779	2.34773	4.89669	3.48805	1.2074	0.067078
559.595	7.7343	3.93383	0.066675	2.1336	2.20027							559.595	9.46785	4.93395	3.40042	2.53365	1.80022							558.848	6.0813	5.74716	1.938	3.20772	3.14089	-0.601447						558.102	5.95962	4.15164	2.41063	4.62038	2.8124	-0.066962	-0.468734
560.342	7.91372	4.58863	2.19456	1.13053	1.86205							560.342	6.05167	3.5246	2.46057	2.32756	-1.72905							559.595	5.80072	4.20052	3.53377	2.73367	2.80035	2.86702						558.848	5.27937	3.60868	0.200483	2.00482	2.94041	2.13848	2.73993
561.089	6.89561	3.77933	1.52499	1.52499	1.52499							561.089	4.57497	2.51955	4.11085	3.64672	0.464128							560.342	5.05414	6.18467	2.19456	3.85711	4.32262	2.26106						559.595	4.60058	3.00038	2.33363	2.20027	3.60045	1.6002	1.20015
561.835	6.67464	4.16339	2.97385	0.330428	2.70951							561.835	3.89905	4.36165	3.17211	2.64342	0.528684							561.089	7.29343	4.57497	0.795647	4.44236	3.3152	1.45869						560.342	4.38912	5.18714	2.66007	1.13053	1.66255	1.86205	1.26354
562.582	6.05802	5.72878	1.7779	0.987721	2.96316							562.582	5.13615	4.21427	2.10714	3.68749	1.05357							561.835	5.22076	1.25562	4.5599	2.70951	2.04865	2.64342						561.089	4.37606	5.96736	4.04454	2.12173	1.85651	1.45869	3.71302
563.328	4.72224	3.9352	0.131173	0.327933	3.14816							563.328	6.82101	3.27933	2.36112	3.47609	1.57408							562.582	5.26784	4.01673	2.17299	2.37053	2.83147	2.04129						561.835	7.3355	4.36165	2.51125	-0.330428	2.57734	0.991283	1.78431
564.075	7.83646	2.41624	-0.653038	2.02442	0.261215							564.075	5.0937	3.52641	0.587734	2.35094	1.43668							563.328	5.11576	4.13196	3.01699	5.11576	2.62347	-0.918213						562.582	4.47767	1.71205	4.80691	1.7779	0.921873	3.48995	1.05357
564.821	4.68018	4.09515	0.52002	4.03015	2.27509							564.821	7.15027	3.18512	1.43005	3.90015	1.43005							564.075	5.55082	3.98353	3.19989	5.55082	1.04486	1.30608						563.328	4.06637	3.54168	1.70525	2.16436	2.55788	2.55788	0.59028
565.568	6.27273	5.04405	2.06935	1.22868	3.81537							565.568	6.33739	6.5314	3.29803	1.09934	2.65136							564.821	4.55017	2.5351	1.62506	3.44513	1.49506	4.22516						564.075	4.57127	2.02442	3.59171	2.08972	2.74276	3.33049	0.653038
566.314	6.04414	2.89347	1.54318	1.47889	1.80038							566.314	5.52974	3.15067	1.60748	0.642993	1.35029							565.568	4.65605	3.10403	1.48735	2.78069	1.03468	1.09934						564.821	2.99011	3.31513	4.03015	2.34009	2.14508	2.92511	2.40509
567.06	6.45466	4.85697	1.91722	0.639075	0.639075							567.06	5.55995	3.451	1.46987	3.57882	2.17286							566.314	4.82245	4.43666	4.37236	3.27927	2.31478	1.02879						565.568	5.94939	2.78069	4.46204	2.32802	3.49203	2.9747	-0.129335
567.807	7.61888	3.87293	0.825378	1.52378	1.96821							567.807	4.0634	4.38086	3.80944	3.55548	1.39679							567.06	6.64638	4.79306	1.59769	3.32319	1.78941	2.49239						566.314	5.46544	2.37908	4.56525	3.02207	3.34357	1.28599	1.15739
568.553	7.75644	4.66648	1.57651	0.693665	3.15302							568.553	5.99075	4.91872	2.7116	2.64854	1.32427							567.807	5.90463	3.61897	1.65076	3.61897	1.90472	2.34915						567.06	4.15399	5.24041	2.49239	3.57882	1.53378	-0.447353	0.894705
569.299	6.32699	4.38504	1.94195	-0.689078	0.501148							569.299	7.204	3.50803	3.38275	3.3201	1.25287							568.553	6.49523	3.90975	4.16199	1.26121	0.378363	1.38733						567.807	6.53954	3.42849	2.66661	4.0634	1.14283	3.11104	2.60312
570.046	4.54415	3.11244	2.24095	2.98794	1.68071							570.046	5.97588	3.92167	1.99196	1.43172	0.995979							569.299	3.25746	3.75861	3.69596	2.69367	2.31781	1.12758						568.553	4.98178	3.84669	2.83772	5.1079	3.53139	2.45936	1.82875
570.792	6.31141	3.09383	3.21758	1.79442	3.27946							570.792	6.18766	4.33136	3.71259	3.27946	1.79442							570.046	4.66865	3.11244	3.36143	1.43172	3.73492	1.61847						569.299	5.32469	3.69596	2.69367	3.38275	3.00689	2.19252	3.3201
571.538	5.72214	3.87629	3.01489	2.76878	1.23057							571.538	7.93716	3.50712	3.261	1.53821	2.09196							570.792	6.43516	4.51699	4.08385	2.22756	2.9082	0.990025						570.046	4.79315	5.47789	2.67669	2.86344	2.05421	1.61847	1.80521
572.284	4.83492	3.9781	1.65244	0.367209	5.75295							572.284	4.40651	2.50926	3.12128	2.08085	1.16283							571.538	5.84519	4.86074	3.56864	3.50712	2.46113	1.10751						570.792	5.44514	2.9082	2.59882	4.57887	1.29941	2.97007	4.02198
573.03	7.61175	4.26258	1.33967	1.09609	2.25308							573.03	4.56705	5.48046	2.74023	2.86202	3.0447							572.284	5.81415	2.99888	0.79562	3.8557	1.77485	2.99888						571.538	6.15283	4.36851	0.184585	3.44559	1.78432	1.35362	2.33808
573.776	5.75722	5.1512	1.99988	-0.606023	0.060602							573.776	3.99975	4.12096	1.57566	3.51493	3.09072							573.03	5.84582	2.98381	2.37487	1.09609	2.55755	3.41006						572.284	4.83492	3.54969	2.57046	3.42729	2.26446	3.30488	0.734419
574.522	6.99797	5.61044	2.11146	1.93047	0.844583							574.522	6.15339	3.37833	3.19735	3.01637	0.241309							573.776	3.69674	3.69674	3.87855	3.03011	0.545421	2.06048						573.03	4.87152	4.62794	2.49665	3.16649	1.82682	0.426258	3.16649
575.268	5.94802	2.58349	1.14154	1.86251	3.00405							575.268	5.16697	3.4847	0.240324	1.62219	2.34316							574.522	5.7311	4.04193	3.98161	1.80982	1.50818	3.43866						573.776	5.69662	2.96951	2.78771	3.39373	1.69686	1.15144	2.06048
576.014	6.34568	5.02865	2.09527	1.25716	-0.23946							576.014	6.22595	4.66946	3.29257	2.57419	2.215							575.268	3.96535	3.84519	2.28308	2.28308	2.28308	2.34316						574.522	4.4039	2.83539	2.89571	2.29244	1.44786	1.02557	1.14622
576.759	5.0125	2.80461	1.84985	-0.059673	3.93839							576.759	5.54955	5.0125	1.25313	2.20789	1.55149							576.014	5.98649	3.65176	2.51433	3.71162	3.17284	3.83135						575.268	4.32584	4.446	4.02543	2.88389	2.82381	1.14154	2.16292
577.505	7.02195	3.6895	0.119016	1.42819	3.92753							577.505	5.65327	5.9508	1.01164	1.13065	1.60672							576.759	5.6689	3.87872	3.58036	3.28199	2.86429	3.22232						576.014	5.56744	2.63406	3.17284	2.87351	1.31703	1.55649	1.91568
578.251	5.46253	2.73126	4.8094	2.49376	1.54376							578.251	4.3344	3.85939	2.01876	2.96876	3.50314							577.505	3.92753	2.79688	4.04655	2.91589	2.14229	0.892621						576.759	6.743	4.29643	3.99806	3.58036	1.49181	3.10297	3.28199
578.997	3.37837	3.08202	4.26741	2.07444	2.25224							578.997	6.22331	3.61545	1.9559	2.13371	2.25224							578.251	5.16565	2.85001	3.91877	2.13751	2.96876	3.08752						577.505	4.58212	5.71277	2.67786	1.90426	-0.178524	2.26131	0.595081
579.742	4.43933	1.71654	4.85367	0.236764	1.3022							579.742	4.14338	2.54522	1.47978	3.37389	1.71654							578.997	4.62303	3.55618	2.07444	4.0896	4.44522	3.37837						578.251	6.88753	3.80002	4.69065	0.178126	1.72188	4.21565	0.771879
580.488	6.21026	4.37676	2.66154	0.88718	3.01641							580.488	4.31761	2.6024	2.77983	2.48411	2.48411							579.742	4.85367	5.14963	3.72904	4.26176	3.66985	3.43308						578.997	4.20814	4.86011	4.80084	4.20814	2.84494	3.02275	1.00758
581.233	5.97217	2.42434	4.02086	-0.05913	0.473043							581.233	6.38608	3.48869	1.53739	3.48869	2.77913							580.488	6.15112	2.66154	4.19932	1.3012	1.59692	2.24752						579.742	5.38639	4.02499	3.55147	3.19632	1.18382	4.14338	2.13088
581.979	7.03743	3.43001	3.25259	1.18276	1.00535							581.979	5.38156	5.08587	3.48915	2.06983	2.12897							581.233	5.85391	3.25217	3.3113	2.48347	3.07478	2.83826						580.488	5.50052	4.08103	2.42496	5.85539	1.9518	1.00547	3.31214
582.724	3.3728	1.53847	1.59764	1.77516	2.01185							582.724	3.66866	5.08878	2.24853	3.84617	0.887579							581.979	4.9676	5.32242	2.83863	3.54828	3.7257	2.60207						581.233	7.39129	1.24174	3.54782	5.85391	4.19825	2.60174	3.07478
583.47	4.79773	1.59924	1.18463	3.61311	1.77694							583.47	4.91619	2.66541	1.48078	1.30309	0.355387							582.724	4.79292	3.90535	2.18936	2.48522	3.01777	0.236688						581.979	4.43535	4.37622	2.4838	4.9676	3.13432	2.66121	2.24725
584.215	4.09276	5.21976	2.72851	2.66919	1.89809							584.215	5.93154	3.14372	0.237262	1.36425	1.5422							583.47	3.61311	4.38311	2.36925	3.25772	3.31695	3.37618						582.724	4.8521	5.32547	3.07694	3.25446	4.37872	5.02961	1.71599
584.961	6.35855	2.61473	1.36679	2.91186	4.57578							584.961	5.5266	1.72335	1.12909	0.772535	1.72335							584.215	4.6266	1.30494	3.38098	3.91482	0.533839	2.60988						583.47	3.90926	3.90926	1.77694	3.90926	3.02079	2.31002	2.01386
585.706	6.076	2.79973	1.9062	0.059569	3.33584							585.706	4.58679	2.79973	2.26361	3.21671	2.32318							584.961	6.59626	4.75406	2.85244	3.20899	3.98152	2.37703						584.215	3.55892	6.82127	4.86386	3.61824	1.00836	1.12699	4.6266
586.451	4.7786	3.40476	1.67251	1.01545	3.52422							586.451	4.36048	3.22556	1.13492	1.73224	1.19465							585.706	4.64635	4.05067	2.38275	2.74016	3.33584	2.79973						584.961	3.98152	2.73359	5.40774	3.74382	3.62497	2.37703	2.13933
587.196	5.45204	3.05554	2.09694	1.73746	1.9172							587.196	5.99125	3.11545	2.57624	1.4379	1.49781							586.451	3.82288	6.21218	1.91144	2.98663	2.7477	1.79198						585.706	4.64635	3.93153	2.85929	2.26361	3.15714	3.63369	1.66792
587.942	4.08713	3.60629	1.02178	0.661154	1.68294							587.942	3.00524	2.82493	0.841469	1.50262	2.82493							587.196	4.61326	3.29519	4.43353	1.49781	3.41501	5.21239						586.451	3.52422	3.34502	4.47994	4.06181	3.46449	2.26984	3.22556
588.687	5.24639	4.58305	1.56789	1.50758	1.68849							588.687	3.79911	3.6182	0.72364	0.844247	0.422123							587.942	3.48608	3.24566	4.02703	2.04357	2.10367	2.76483						587.196	3.47492	2.21676	5.81151	2.99562	2.99562	2.8758	1.79737
589.432	5.02177	5.08227	1.45208	1.08906	1.9361							589.432	4.11422	4.17472	2.96466	1.99661	1.33107							588.687	4.76396	2.71365	3.07547	3.31668	4.52275	4.16093						587.942	3.96692	3.12546	5.16902	3.42598	1.32231	3.7265	3.78661
590.177	3.27823	1.82124	2.18549	-0.910619	2.54973							590.177	4.73522	2.79257	1.15345	3.94602	2.91398							589.432	5.14277	3.08566	3.32768	4.96126	3.50919	2.42013						588.687	2.77395	3.01517	4.28154	1.92971	4.82427	2.77395	2.47244
590.922	5.36107	3.10699	2.5587	0.182764	2.8633							590.922	6.76226	4.63002	1.94948	1.94948	0.548292							590.177	4.00673	3.58177	3.70318	4.5531	3.8246	3.88531						589.432	5.56629	1.99661	5.50579	2.90415	4.53774	1.14956	2.78315
591.667	6.54161	6.17479	2.87342	1.40614	3.24024							591.667	3.97388	4.58524	2.5066	1.52841	2.26205							590.922	3.28975	5.17831	3.04607	4.08173	3.77712	2.92422						590.177	4.49239	3.52106	5.88867	2.18549	2.54973	4.43168	3.15681
592.412	6.19688	3.80403	2.69963	1.53388	2.39285							592.412	3.98809	0.797618	1.53388	3.98809	3.06776							591.667	3.66819	1.95637	2.75115	3.79047	3.79047	3.48478						590.922	6.33582	1.82764	5.30015	4.02081	2.07132	2.07132	2.92422
593.157	4.49476	3.63275	2.15502	0	1.41616							593.157	5.04891	4.37162	2.33974	1.72402	2.77074							592.412	4.23351	2.39285	4.1108	2.3315	1.2271	2.39285						591.667	5.44115	3.66819	3.79047	3.42365	3.79047	3.42365	4.27956
593.902	4.44902	5.06694	1.60659	0.679711	3.70751							593.902	2.90422	4.14006	2.03913	2.03913	2.2863							593.157	3.69432	2.89389	3.38646	3.14018	3.26332	1.29301						592.412	5.09249	3.19047	4.41758	5.03113	3.37454	3.74267	2.08608
594.647	5.14652	4.77448	2.91429	1.61216	2.66627							594.647	4.27843	2.23223	1.79818	0.930094	2.10821							593.902	3.27497	3.27497	3.70751	4.5726	3.8311	5.3141						593.157	4.00218	1.35458	2.95546	5.66463	5.84934	5.47991	2.09345
595.391	3.67099	3.11101	1.67994	3.42211	2.11548							595.391	2.55102	2.1777	0.995522	0.995522	2.98657							594.647	4.34044	1.73618	4.21643	2.91429	1.55016	1.86019						593.902	5.37589	2.53347	2.59526	5.19052	2.90422	4.81977	4.51081
596.136	5.55608	4.18267	1.68555	1.62312	2.37226							596.136	6.05551	1.81041	2.80925	3.05897	2.18498							595.391	3.11101	2.7999	4.47985	4.04431	2.98657	5.10205						594.647	4.71248	2.17022	3.78238	4.71248	2.48025	3.16232	5.45655
596.881	4.57237	3.82075	1.31534	1.31534	2.3175							596.881	5.07345	2.88122	3.25703	0.250541	1.44061							596.136	6.99193	2.55954	3.68325	2.49712	4.12024	5.43123						595.391	5.28871	4.04431	4.91539	5.78647	3.60877	1.74216	2.05326
597.625	4.20955	2.13619	0.376974	-0.188487	0.879607							597.625	4.02106	3.20428	1.9477	2.45033	3.70691							596.881	4.50973	2.06696	3.69548	3.00649	3.94602	5.07345						596.136	4.36995	3.74567	2.93411	4.68209	4.68209	4.61967	1.06127
598.37	2.58335	2.70937	1.89026	1.4492	1.4492							598.37	3.7175	4.34759	3.52848	2.45733	2.01627							597.625	2.95296	2.32468	3.51843	4.46086	3.32994	1.75921						596.881	3.25703	3.82075	3.1944	4.94818	4.69764	5.5119	1.87906
599.115	2.84257	3.34791	2.9689	1.13703	4.67444							599.115	2.9689	3.97959	1.26336	2.58989	2.02138							598.37	4.22157	5.9228	4.34759	4.28458	4.59962	5.60776						597.625	3.51843	3.76974	3.95823	4.83784	3.83257	3.20428	5.96876
599.859	4.24183	3.92528	3.41879	1.96264	3.41879							599.859	3.79866	3.79866	1.83602	2.40582	1.39284							599.115	2.84257	3.34791	3.60059	2.58989	3.79009	2.27405						598.37	2.83539	3.21344	2.9614	4.22157	4.09556	4.34759	4.59962
600.604	5.32825	3.55217	3.29844	4.12305	2.6007							600.604	5.51855	3.36187	2.34697	2.4104	2.22011							599.859	4.81163	4.0519	4.30515	5.95123	2.72237	6.26778						599.115	2.40039	2.21089	2.58989	4.99028	3.34791	5.43246	4.61128
601.348	6.16295	1.52485	1.14364	4.25688	2.6685							601.348	3.93921	2.79557	1.01657	1.71546	2.6685							600.604	4.05962	2.85442	4.56707	4.63051	3.67903	4.56707						599.859	3.35548	4.43177	5.06488	4.68501	2.72237	3.92528	4.6217
602.092	4.13589	1.59072	2.22702	1.14532	1.59072							602.092	4.77217	2.09976	2.09976	2.99056	1.20895							601.348	4.12981	2.41435	4.89224	3.93921	6.4171	4.44749						600.604	3.04472	1.39549	6.2163	4.44021	5.96257	4.88423	2.47383
602.837	4.39612	2.54848	2.35734	1.21053	2.99446							602.837	5.03324	4.58726	3.31302	2.54848	0.700831							602.092	5.28121	3.18145	4.58129	3.75411	4.58129	4.45403						601.348	3.11324	3.24032	6.09942	3.36739	5.65467	5.33699	5.01931
603.581	2.36003	3.12545	2.16868	2.61517	0.8292							603.581	5.67683	2.67896	1.72219	0.255139	3.44437							602.837	3.50415	3.24931	4.58726	5.86149	4.65097	4.77839						602.092	4.51766	3.88137	5.47209	4.13589	5.02669	4.58129	4.07226
604.325	3.25608	3.44761	3.06454	0.127689	0.446913							604.325	3.38377	4.53297	2.36225	2.04303	2.74532							603.581	5.23034	4.27357	4.20979	4.27357	5.23034	6.18711						602.837	4.14127	3.88643	5.3518	3.88643	5.73407	6.37119	4.58726
605.07	4.40864	3.38635	3.13077	0.894507	3.32245							605.07	3.13077	2.74741	2.49184	4.02528	2.04459							604.325	5.93755	3.70299	6.44831	5.10757	3.70299	5.17142						603.581	2.80653	2.23246	4.01843	6.88874	3.06166	6.05954	5.29413
605.814	4.60288	1.53429	0.57536	1.08679	2.4293							605.814	4.92253	4.15538	2.94073	1.02286	2.04573							605.07	4.53643	2.23627	3.32245	6.64491	5.55872	3.06688						604.325	5.10757	0.510757	4.97988	4.59682	4.59682	8.36365	5.49064
606.558	2.2385	3.51765	1.98267	2.43037	2.62224							606.558	6.07593	2.2385	2.87807	0.511658	2.62224							605.814	2.81287	3.38823	2.74894	5.24217	5.94539	6.2011						605.07	5.11147	3.51413	4.02528	7.85888	6.83659	5.68651	4.08917
607.302	4.41433	3.58264	1.15156	1.8553	2.62301							607.302	2.81493	2.62301	1.21554	0.575782	2.3671							606.558	2.04663	2.62224	6.20385	5.69219	3.32577	6.26781						605.814	4.79467	2.8768	5.43396	6.96825	7.28789	6.32896	5.17824
608.046	4.67161	2.81576	0.447963	3.5837	1.91984							608.046	4.60762	2.75177	2.68777	1.85584	2.17582							607.302	4.2224	2.94288	3.9665	4.4783	4.73421	6.97336						606.558	2.11059	4.28513	4.60492	5.11658	4.41305	6.77946	6.45968
608.79	6.14496	2.62441	3.13649	1.9203	2.5604							608.79	3.96862	4.73674	2.49639	1.21619	2.24035							608.046	3.13574	2.94375	4.92759	5.31156	4.54362	3.07174						607.302	5.75782	4.09445	3.51867	6.90938	4.79818	5.88577	5.18204
609.534	4.48166	4.41764	0.128048	2.30485	3.07314							609.534	3.64935	1.85669	3.00912	2.94509	1.98474							608.79	3.2005	1.98431	3.39253	5.95292	4.54471	5.56887						608.046	2.68777	2.87976	6.07949	5.05558	6.46346	6.52745	6.97542
610.278	1.4728	1.60087	1.2807	2.68946	1.21666							610.278	4.73857	3.07367	1.02456	2.36929	2.56139							609.534	0.960356	3.64935	3.00912	5.1219	6.72249	5.89018						608.79	4.60872	2.94446	3.07248	9.53748	6.08094	5.1208	8.12926
611.022	5.05967	2.04949	2.17758	1.66521	2.36972							611.022	3.13828	3.65065	1.08879	0.512372	3.7147							610.278	3.97016	3.52191	3.71402	2.88157	6.14734	6.21138						609.534	3.20119	1.92071	2.75302	8.06699	5.31397	4.60971	7.29871
611.766	2.8184	2.56218	1.85758	2.24191	2.24191							611.766	3.77922	4.9322	1.98569	2.30597	4.41977							611.022	2.36972	2.754	3.45851	4.48325	7.04512	3.77874						610.278	3.45788	3.26578	5.50699	6.01927	6.97979	6.72365	6.65962
612.51	5.25355	1.53763	1.7939	1.7939	4.10033							612.51	3.39559	3.9722	0.512542	0.83288	2.62678							611.766	3.26679	4.09949	3.58706	6.3414	4.61193	5.82897						611.022	4.35516	3.20233	2.43377	8.83842	6.3406	5.63609	6.14846
613.253	3.78072	2.69136	1.34568	2.94768	3.8448							613.253	6.27984	3.58848	0.3204	2.05056	1.98648							612.51	3.9722	3.65186	4.3566	4.99728	4.29254	4.67694						611.766	1.98569	2.62624	5.5087	3.84328	7.75061	6.78979	8.58332
613.997	5.06346	2.37149	2.3074	0.57685	2.43559							613.997	2.37149	4.10205	1.28189	0.640945	1.60236							613.253	3.5244	1.08936	4.74192	6.53615	4.93416	6.53615						612.51	4.29254	2.11423	1.85796	4.3566	5.31762	6.72711	6.47084
614.741	3.97501	2.50041	2.50041	2.30807	2.88509							614.741	2.75686	2.56453	1.02581	0.705245	1.66694							613.997	4.99937	3.90976	3.4611	7.17858	6.53763	6.40944						613.253	2.05056	1.85832	5.51088	4.1652	7.81775	5.70312	6.92063
615.484	2.30889	4.68192	2.75784	5.06673	2.82198							615.484	4.16883	2.37303	1.92408	1.53926	4.10469							614.741	4.23147	2.82098	3.46211	6.53954	6.73188	6.86011						613.997	2.49968	3.26882	3.07653	4.16614	8.01181	6.72992	7.24267
616.228	2.69469	3.27212	1.79646	1.60398	2.69469							616.228	4.68363	2.88717	3.33628	1.47566	3.84956							615.484	3.71988	2.24476	5.96463	5.32328	7.05494	5.45155						614.741	6.02664	4.03913	4.8726	5.51373	5.77018	8.33471	8.59116
616.972	5.07118	2.63188	3.33799	3.97991	3.08122							616.972	3.08122	4.75021	2.95284	1.02707	2.56768							616.228	1.92478	2.82301	3.27212	7.5708	5.00443	6.67257						615.484	3.78402	1.92408	3.27093	5.0026	7.6963	9.10729	8.14525
617.715	4.36777	2.50504	2.05542	2.56927	3.46852							617.715	2.95466	2.44081	2.69774	1.6058	2.44081							616.972	2.56768	1.73319	3.40218	6.03406	6.80436	8.53755						616.228	4.68363	5.00443	4.36283	6.80089	7.25	9.75221	7.31416
618.458	2.37824	3.72805	1.22126	2.57107	3.21383							618.458	2.05685	3.59949	1.15698	3.34239	2.31396							617.715	4.2393	2.95466	1.79849	5.6524	5.20278	6.23049						616.972	2.82445	1.669	4.8786	6.99694	7.25371	7.70305	7.38209
619.202	3.85986	2.89489	1.09363	2.63757	2.89489							619.202	1.8656	1.8656	1.09363	3.02356	4.05285							618.458	3.27811	3.8566	3.59949	6.68477	6.74905	6.36339						617.715	5.20278	2.50504	4.432	8.15744	6.93704	8.6713	5.90933
619.945	2.76886	2.89764	3.34838	3.34838	3.9923							619.945	2.06054	2.51129	1.73858	1.86737	1.15906							619.202	4.05285	2.63757	4.88916	3.92419	5.5968	4.50317						618.458	3.27811	5.27069	4.75647	6.81332	8.48452	7.07043	8.93445
620.689	2.90055	1.41804	1.4825	3.28728	3.22283							620.689	3.80294	0.966848	3.22283	3.15837	2.19152							619.945	2.89764	1.99615	4.57183	6.4392	6.11724	7.79143						619.202	3.53821	1.41528	6.24011	5.27514	8.10571	8.49169	6.94775
621.432	4.06485	4.19389	2.7099	4.12937	4.38746							621.432	4.25842	4.00033	3.35512	1.87112	1.16139							620.689	2.44935	2.12707	3.4162	6.51011	7.99261	6.51011						619.945	3.67034	1.99615	5.92406	5.79528	8.43535	7.66265	8.17778
622.175	4.19837	2.77738	2.06689	3.55247	2.45443							622.175	3.48788	3.3587	0.839674	0.645903	3.29411							621.432	1.54852	2.90347	3.93581	6.38762	8.77492	7.35544						620.689	0.902392	3.67402	3.48065	9.08837	8.12153	9.92631	7.67033
622.918	2.58632	1.68111	3.03892	2.78029	3.55619							622.918	4.84934	3.6855	2.457	1.42247	2.39234							622.175	1.93771	2.38984	4.13378	4.97345	7.62165	7.75084						621.432	0.516172	1.16139	4.12937	8.58135	7.74257	11.2267	10.4525
623.662	5.6316	1.29462	0.776773	1.68301	2.97763							623.662	3.23655	2.39505	1.68301	2.52451	3.62494							622.918	2.9096	1.61645	4.52605	4.914	6.98305	6.59511						622.175	2.71279	1.61476	3.68165	5.68395	8.0092	8.20297	9.94691
624.405	2.9163	3.75879	2.07381	2.26823	4.8605							624.405	4.27724	3.04591	2.59227	3.30514	5.89741							623.662	2.26559	1.0357	4.01333	5.69633	6.34364	6.40837						622.918	3.03892	2.457	4.72003	4.59071	7.62963	8.5995	8.72882
625.148	4.67201	2.46578	2.27111	2.01156	4.47734							625.148	3.43912	2.59556	3.04978	4.21779	0.64889							624.405	3.36995	2.52746	3.62917	7.90641	7.45277	7.32315						623.662	1.61828	2.33032	3.43075	4.91956	9.25654	7.63826	9.386
625.891	3.31372	0.779698	1.88427	6.04266	5.26296							625.891	4.28834	0.714723	2.85889	2.40407	5.91271							625.148	2.27111	2.72534	4.7369	5.84001	8.63024	8.88979						624.405	0.518453	4.34205	4.53647	6.67509	6.73989	8.87851	8.55448
626.634	2.99298	1.04104	2.79778	4.68466	4.87986							626.634	3.57856	3.70869	2.92791	2.79778	3.18817							625.891	2.72894	2.40407	2.92387	3.96346	8.64165	8.96652						625.148	3.24445	1.68711	4.02312	6.68357	6.74846	9.47379	10.7067
627.377	5.86385	3.19254	2.28039	3.97439	2.73646							627.377	3.06223	2.93193	2.41069	4.62593	3.2577							626.634	1.82181	2.08207	2.2122	4.81479	6.18115	9.2392						625.891	3.18377	3.31372	4.80814	7.2122	7.92693	9.48632	7.34215
628.12	3.45839	1.76182	3.19738	4.37193	5.35072							628.12	4.30668	3.45839	2.80587	1.95758	1.43556							627.377	2.28039	2.15008	3.51831	6.84116	6.05931	11.1413						626.634	2.47246	1.17117	3.77375	5.00999	8.52348	9.43439	9.044
628.862	0.196075	2.94112	3.26791	4.37901	5.81689							628.862	3.52935	3.00648	2.48361	4.7058	2.15682							628.12	3.65415	3.52365	2.67536	4.76345	7.24305	7.50406						627.377	2.93193	2.08493	5.99416	6.31993	7.75331	9.77309	9.31701
629.605	0.458257	2.81501	2.68408	6.21921	5.49909							629.605	5.1063	0.654653	2.68408	3.92792	2.94594							628.862	2.28754	2.54897	2.81041	4.05222	5.62081	9.93446						628.12	3.84991	1.50081	3.7194	5.87274	8.35235	10.3099	10.3099
630.348	2.88543	4.19699	2.16407	4.32815	7.27915							630.348	2.81985	4.32815	2.29523	1.37714	3.93468							629.605	1.57117	2.22582	3.14234	6.48107	7.98677	7.72491						628.862	1.50324	1.17645	5.55546	6.33976	7.12406	10.392	9.21552
631.091	2.36505	1.70809	1.70809	6.17541	5.84693							631.091	3.87606	4.53301	1.37961	2.49644	5.32136							630.348	2.75427	3.80352	2.49196	5.96759	7.60704	7.67262						629.605	5.1063	2.48768	5.49909	9.29608	9.09968	10.7363	9.75434
631.833	3.09302	0.65809	5.33053	6.05443	8.09451							631.833	2.23751	3.15883	0.460663	3.09302	3.88273							631.091	3.2191	1.70809	2.49644	6.83237	5.97832	8.60616						630.348	0.852513	3.34448	4.4593	4.91835	9.90227	11.4106	8.65629
632.576	3.03228	2.96636	5.60312	6.19639	6.39415							632.576	4.21882	5.8668	2.83452	4.21882	3.95515							631.833	3.48788	2.50074	3.94854	5.92281	6.64671	8.68679						631.091	0.394175	3.87606	5.84693	7.42363	8.08059	10.5113	10.8398
633.319	3.3676	1.51872	3.30157	7.26345	7.06536							633.319	3.96188	2.57523	2.77332	1.84888	5.61267							632.576	1.45022	0.791029	3.55963	7.11926	8.17397	9.88786						631.833	2.10589	2.69817	1.4478	7.04156	5.52796	8.95002	11.6482
634.061	3.17497	1.71978	3.10883	6.21766	7.07755							634.061	3.30727	3.37341	2.64581	4.69632	4.29945							633.319	2.70729	3.3676	3.43363	6.80123	7.85774	6.80123						632.576	4.02107	4.08698	3.0982	7.05334	10.4152	11.7995	11.3381
634.804	2.98178	2.31916	4.24075	4.70458	9.3429							634.804	4.57206	5.49972	2.51795	2.05411	6.95748							634.061	4.29944	1.19061	5.22548	5.55621	7.07755	11.1124						633.319	2.83935	3.3676	5.6787	7.32949	9.2444	9.57455	10.8292
635.546	2.12417	2.65521	3.65091	8.29752	10.4881							635.546	1.26122	4.71299	3.58453	3.58453	4.97851							634.804	2.65047	3.24682	4.63832	5.76477	7.75262	10.138						634.061	0.727598	3.10883	4.69632	7.80515	10.6494	10.2525	10.7817
636.289	2.19455	1.66254	4.5221	6.91616	11.2388							636.289	3.65758	3.25857	3.85709	4.05659	6.18464							635.546	3.65091	1.99141	5.17765	5.77507	8.032	10.2889						634.804	1.65654	2.58421	3.64439	8.08393	9.27664	10.2043	10.9994
637.031	3.26484	2.39866	2.59855	10.1277	10.794							637.031	0.599665	2.93169	3.59799	4.5308	7.19597							636.289	3.19207	3.45808	3.39158	7.18216	8.11318	11.5713						635.546	3.71729	2.3233	4.04919	6.43888	9.16046	11.0855	11.6165
637.773	2.40317	0.867812	4.60608	9.7462	11.8824							637.773	4.1388	3.00397	5.80767	4.8731	5.80767							637.031	1.53248	2.53192	4.73069	6.32979	8.46193	8.59519						636.289	1.26353	5.38662	2.85956	5.18712	9.24371	10.5737	12.9013
638.516	2.14005	3.21008	5.48389	9.22898	12.9741							638.516	3.67822	4.68137	4.21323	6.55392	7.35644							637.773	2.33642	3.538	4.93985	6.80899	9.07865	10.5473						637.031	1.26596	3.26484	4.19765	7.79564	9.99441	10.9939	9.99441
639.258	2.07705	3.21608	3.68509	9.78223	12.8643							639.258	3.41708	2.61306	5.29313	5.42713	7.03517							638.516	2.54131	3.67822	4.81512	6.8883	11.9041	11.6365						637.773	1.93589	4.20555	5.74091	5.40714	9.21216	9.54594	11.8156
640	3.2891	3.69185	5.77271	11.2769	11.4783							640	1.94661	3.02061	4.16172	5.16859	7.51795							639.258	2.88107	5.29313	3.28308	5.96314	8.64321	10.1842						638.516	1.73879	2.14005	5.28326	6.68767	8.62709	12.5059	11.3022
640.742	2.75694	1.14312	5.17766	12.3054	15.1295							640.742	1.88279	4.70697	4.90869	6.1863	7.66563							640	2.48361	3.42335	3.5576	6.91383	8.65907	14.6332						639.258	2.41206	2.94807	3.35008	8.3082	11.1223	10.9883	11.5913
641.484	1.14518	4.37862	7.7468	13.0011	13.7421							641.484	1.88618	5.79326	3.43554	4.85017	7.14053							640.742	0.067242	4.70696	6.11905	8.13632	9.41393	11.5657						640	2.88636	3.2891	6.98095	7.85357	8.65907	12.955	13.0893
642.226	1.75469	4.31925	6.95129	13.1602	16.8721							642.226	6.07394	5.87148	5.87148	7.55868	7.89612							641.484	1.88618	3.43554	5.92798	7.34262	12.4622	13.7421						640.742	3.16039	3.76557	6.45527	7.19493	11.2967	14.0537	10.6243
642.969	4.73269	4.1242	6.82859	14.1981	16.294							642.969	4.46225	2.43396	4.46225	8.31601	9.6006							642.226	2.2946	3.37441	6.34389	9.51584	11.5405	13.1602						641.484	0.875725	4.7828	3.90708	7.27525	10.5087	11.4518	12.1254
643.71	3.72537	2.09975	6.02832	13.8854	16.0529							643.71	4.67364	4.1995	3.7931	6.77339	9.82142							642.969	1.08176	2.23113	7.03142	6.22011	11.8993	13.7924						642.226	1.21479	4.38674	4.72418	9.98826	11.6755	13.1602	13.6326
644.452	2.85017	2.23942	8.14333	16.3545	16.8296							644.452	3.52878	4.34311	6.17536	6.17536	10.5185							643.71	0.338669	3.9963	7.9926	8.33127	9.88915	15.1047						642.969	4.59747	5.4764	5.74684	9.93865	13.7924	14.0628	13.7924
645.194	1.90357	4.28304	7.61429	16.1124	18.4918							645.194	2.99133	2.58342	4.35102	6.79847	10.2657							644.452	1.5608	4.75028	5.97178	9.50055	10.5185	16.4224						643.71	4.53817	5.55418	8.87314	8.06033	11.6502	14.2241	15.7143
645.936	2.04323	3.6097	7.76427	15.7329	19.3426							645.936	4.29078	3.95024	4.56321	9.8756	12.1913							645.194	3.33125	5.50676	7.95421	10.4696	13.529	17.2681						644.452	3.80022	6.4468	8.41478	10.1113	14.3187	13.7758	15.8116
646.678	1.15997	2.18348	7.23277	15.0796	20.9477							646.678	0.477636	3.20698	6.55043	11.8727	12.4185							645.936	2.79241	5.92536	8.30913	11.5102	13.8258	14.0983						645.194	1.22372	4.48699	5.43878	10.7416	16.3163	14.6847	17.2001
647.42	4.1699	3.82811	10.664	14.9706	19.7558							647.42	5.46872	4.92185	4.78513	9.43355	9.77534							646.678	3.07051	3.82108	7.5057	10.508	13.8514	16.9902						645.936	1.97512	4.63132	5.51672	10.4886	11.8507	15.188	18.7296
648.162	0.684784	2.25979	9.45003	18.6261	21.5022							648.162	1.09566	5.95763	4.65653	10.2033	14.1066							647.42	1.36718	6.35739	9.70698	12.5097	15.039	18.0468						646.678	2.79758	7.02807	8.39274	11.8727	14.3973	14.7385	17.7407
648.903	2.67547	4.25331	7.34039	18.5225	22.227							648.903	3.29289	5.21374	6.10556	10.1531	15.161							648.162	0.821741	7.80654	10.8196	12.4631	17.5305	18.9685						647.42	2.93944	5.6738	7.24606	12.373	15.7909	15.6542	20.3026
649.645	4.32966	4.39838	9.62146	20.7549	21.7857							649.645	2.06174	4.60456	7.28482	12.0955	15.0507							648.903	0.823222	6.92878	10.3589	13.2401	16.876	21.198						648.162	2.73914	6.57393	8.49133	11.7098	15.1337	16.5033	20.2011
650.386	1.03265	3.44217	11.2215	20.1022	23.8198							650.386	1.23918	4.75019	6.81549	11.0838	15.9716							649.645	3.09261	7.00992	10.3087	14.0198	18.8306	19.724						648.903	2.67547	5.21374	8.02641	11.9367	14.818	14.2692	18.9341
651.128	1.99983	4.34447	8.55101	18.0675	22.1361							651.128	2.75839	5.17199	6.82702	16.3435	16.6193							650.386	-0.344216	7.50392	11.9787	14.4571	16.3847	22.5806						649.645	2.81771	7.07864	8.86549	12.8515	17.7997	16.4939	22.7479
651.869	4.42106	4.83553	11.8125	22.6579	24.5921							651.869	2.00329	6.07895	9.60198	14.852	16.9244							651.128	1.58607	3.37903	10.8267	14.5505	18.826	23.8601						650.386	0.757276	7.50392	10.0511	14.1129	16.7978	20.0334	21.2037
652.611	2.07581	5.95066	13.562	24.7022	26.6396							652.611	2.97533	6.91937	9.9639	16.0529	19.3051							651.869	1.58882	6.28619	15.1283	16.5099	20.2401	22.7961						651.128	-1.65504	6.62014	9.72333	11.8611	17.7227	19.5156	21.9982
653.352	2.21779	5.19794	15.5245	21.8313	27.9303							653.352	0.900976	5.891	9.4949	15.6631	18.9898							652.611	1.38387	7.61131	11.5554	13.7696	19.651	26.0169						651.869	0.345395	6.49343	14.2994	14.6447	17.8224	21.6217	23.2105
654.094	2.01315	5.97002	15.9663	24.9908	29.6418							654.094	2.15198	7.77491	10.4128	20.2009	23.8106							653.352	1.24751	7.41573	15.5938	18.8512	21.2769	27.0293						652.611	1.45307	8.71841	13.216	14.0463	18.2672	20.6889	25.1865
654.835	4.72826	4.72826	14.6715	24.8234	30.5251							654.835	2.7118	5.4236	9.45653	20.0951	23.989							654.094	0.55535	7.49723	15.2027	20.548	23.6024	29.0171						653.352	3.32668	6.99989	12.1285	14.3463	17.9502	22.4551	25.2273
655.576	3.55205	5.3629	16.0887	29.2522	32.8043							655.576	3.69135	7.93988	10.5169	22.0088	25.2823							654.835	1.4602	7.37053	15.8536	18.2873	24.9625	31.4986						654.094	4.65106	6.52537	14.1614	16.5911	21.2422	24.0883	26.3791
656.318	3.06962	7.9531	16.9527	30.5567	34.1146							656.318	2.79056	8.86003	13.3249	25.4639	29.9985							655.576	2.99487	8.84531	14.6957	19.6408	24.5161	31.4809						654.835	1.8774	9.80419	13.2809	19.3998	23.7109	25.5883	30.1775
657.059	1.74701	4.82175	16.4918	31.2365	36.7571							657.059	1.60725	9.08445	15.2339	26.6943	27.1136							656.318	2.65103	8.23216	19.1153	22.1152	27.7661	33.3472						655.576	1.67155	8.70601	13.5814	20.6855	23.4714	25.8394	31.6899
657.8	2.65981	6.22956	17.7787	31.7078	38.9172							657.8	0.839941	9.58932	16.0289	26.8781	33.2476							657.059	1.60725	12.3688	16.9111	21.9424	30.0486	35.8486						656.318	1.25575	9.6972	13.6738	20.0223	27.6266	29.1614	32.0915
658.541	2.4537	8.5529	21.6627	35.2632	39.0489							658.541	2.3836	8.97354	16.7553	28.0423	33.4404							657.8	3.14978	11.4792	17.3588	23.3783	31.2178	38.0773						657.059	1.95665	12.7182	16.1424	21.593	26.2051	30.6076	36.3378
659.282	3.58089	6.60008	22.8194	39.2494	46.1303							659.282	2.31705	8.49585	17.4832	28.6471	37.7047							658.541	-0.49074	13.1799	18.9987	24.3968	33.5807	41.9232						657.8	1.60989	12.5991	18.2687	23.5883	29.0479	29.3279	35.2075
660.023	4.71138	6.39903	22.7834	39.8006	43.4572							660.023	2.25021	11.3917	16.6656	33.3312	39.0271							659.282	2.73833	11.9363	22.3981	27.8748	36.6515	42.9005						658.541	2.17328	12.9696	17.246	26.0793	28.1825	35.7539	37.0158
660.764	2.5352	8.09855	25.9858	40.7744	51.549							660.764	1.83098	11.6901	22.9576	33.4505	43.1688							660.023	0.632871	11.5323	22.7131	28.5495	39.3787	44.5823						659.282	3.01918	13.3406	20.3619	26.6812	31.3153	35.5983	38.1962
661.505	2.25691	8.18129	26.5187	43.3044	50.851							661.505	0.846341	11.9898	20.9469	36.2516	47.0424							660.764	0.704222	14.4365	23.2393	30.1407	42.535	50.1406						660.023	0.351595	13.22	18.9861	27.8463	33.8938	36.0034	43.2462
662.246	3.39059	8.12328	28.7494	47.115	57.4281							662.246	3.53186	14.7632	21.1205	38.4267	50.5056							661.505	3.59695	12.6246	25.1786	30.962	43.8687	55.1532						660.764	2.18309	13.4506	22.4647	25.5632	35.704	39.7885	49.0138
662.987	3.25438	9.83388	30.4921	52.636	60.6305							662.987	3.11288	15.0692	21.012	42.8729	53.485							662.246	2.40167	14.5513	25.4294	35.9544	46.6912	57.64						661.505	3.24431	15.3752	21.5817	31.1736	38.0148	44.0097	48.8762
663.728	4.03884	8.99883	31.1062	54.2764	61.9289							663.728	3.82627	14.1005	24.3748	46.4113	55.6935							662.987	5.87203	16.0596	29.8554	36.2934	50.7966	59.357						662.246	1.62466	18.3657	23.946	31.928	40.6871	44.2189	53.4724
664.468	2.90968	10.4323	33.0001	56.9872	68.6969							664.468	1.27742	14.1936	24.0581	48.9679	59.9679							663.728	0.708569	19.1314	31.6022	38.617	52.4341	62.2832						662.987	2.75915	18.748	24.6201	34.8784	42.3777	48.8864	56.2441
665.209	1.13726	10.2353	35.5393	61.1277	75.2723							665.209	1.42157	13.2917	27.0099	56.2233	65.1081							664.468	3.7613	18.9484	32.5033	42.6517	54.0775	67.2066						663.728	-0.141714	17.4308	26.5005	35.7827	45.3484	49.3873	58.8821
665.95	4.05795	13.8825	38.5149	64.9271	79.3079							665.95	0.925497	19.2219	28.9752	55.1738	67.7748							665.209	4.3358	20.4707	33.4781	43.9977	57.5737	69.515						664.468	4.32904	17.1742	33.142	39.3872	48.8969	53.013	63.0195
666.69	4.42113	13.9765	39.7189	68.5988	83.2171							666.69	3.13758	17.1854	29.9496	60.4697	74.4461							665.95	0.925497	21.0728	37.5182	45.9189	63.5745	75.1076						665.209	2.20344	23.527	30.5638	43.0737	51.1056	54.3041	66.2453
667.431	3.14309	11.5723	44.2175	74.5055	88.7208							667.431	2.42875	19.3586	32.5024	66.4334	77.5771							666.69	0.427851	22.5335	37.3657	48.4185	67.1727	78.8673						665.95	2.91887	24.6324	33.4603	44.7086	52.8245	58.6622	68.2732
668.171	0.071564	13.8118	44.8706	75.7146	93.6771							668.171	1.28815	21.6839	34.7801	69.2739	84.016							667.431	1.00007	24.6447	41.9316	48.575	71.2909	86.3635						666.69	2.4958	26.5981	36.3674	46.0653	55.1215	63.5359	75.801
668.912	2.50932	15.4144	49.4694	83.2376	97.4332							668.912	0.788642	23.0857	38.4284	72.4117	87.8978							668.171	2.07535	25.3336	42.008	54.3886	74.2118	86.9501						667.431	1.92871	25.4304	36.9313	48.0035	58.0042	66.0048	75.7198
669.652	3.30398	14.5806	50.2061	89.9257	105.296							669.652	1.93929	22.266	40.366	72.5439	94.2353							668.912	1.93576	30.2552	45.2394	60.7255	81.4452	98.4369						668.171	2.64786	25.8346	37.7857	51.5976	65.3378	67.9857	80.2947
670.393	4.67722	17.3417	53.824	93.9762	112.109							670.393	1.15132	22.4507	39.2887	80.4482	101.604							669.652	1.14921	28.3711	47.4768	58.0351	81.6658	101.202						668.912	2.7244	28.6779	42.4433	53.2692	64.2385	72.9853	84.1696
671.133	1.44175	15.4268	57.6702	98.1835	119.882							671.133	3.67647	24.0773	47.5058	85.9286	105.897							670.393	2.44655	32.5966	50.2981	65.0494	87.4281	105.489						669.652	1.79564	30.3822	41.8744	59.0407	67.6598	77.859	89.1356
671.873	-0.505563	15.9613	57.9231	99.957	124.152							671.873	2.81671	26.0004	45.5729	91.868	113.029							671.133	0.720877	34.9626	52.7682	67.402	90.6864	107.771						670.393	2.5185	33.5321	44.8294	63.1065	71.5255	79.7286	97.2142
672.614	2.60511	21.7092	59.5556	108.112	133.801							672.614	3.76293	26.8471	47.0366	93.8562	118.17							671.873	2.02225	35.895	53.8786	69.551	99.3793	113.391						671.133	3.17186	32.872	45.5595	63.0768	76.9897	85.424	102.869
673.354	3.69798	16.6772	68.0863	108.982	136.608							673.354	3.1179	28.1336	50.249	101.803	121.018							672.614	1.0131	37.8464	56.5163	73.3771	104.349	120.197						671.873	3.32227	35.245	48.0285	66.6621	80.2401	88.6902	102.268
674.094	4.14197	18.1665	66.8528	119.318	144.097							674.094	4.2873	27.8311	52.4649	105.293	129.854							673.354	2.24779	38.3574	62.1405	79.3252	104.994	128.777						672.614	0.072364	37.5569	51.6679	70.9168	79.2386	94.218	107.678
674.834	0.364167	21.1217	69.9928	121.413	152.804							674.834	4.66133	31.0998	52.9498	111.508	134.887							674.094	0.217998	40.257	61.5482	83.566	107.764	131.017						673.354	2.90037	42.563	55.6872	72.0743	84.8359	98.2502	111.519
675.574	1.46002	20.9513	69.278	128.117	160.164							675.574	3.21205	32.3395	55.5538	112.495	144.396							674.834	2.8405	39.5485	66.1327	84.4867	115.878	136.708						674.094	2.54331	38.295	59.9495	77.6801	90.4693	98.6079	118.736
676.314	1.68305	24.148	74.2004	131.131	167.866							676.314	2.48798	34.2463	57.5163	117.74	149.718							675.574	1.09502	43.6547	69.132	90.0834	116.729	145.637						674.834	2.4035	41.2965	59.5777	76.1109	92.2799	106.337	121.705
677.054	1.46716	22.6677	77.1728	138.867	167.843							677.054	2.2741	33.2312	57.5128	126.249	150.604							676.314	2.26845	45.0032	71.7856	90.0064	124.984	150.523						675.574	2.62804	41.3916	59.1309	79.8632	95.1204	106.144	129.431
677.794	0.514751	21.9137	79.7865	141.042	177.295							677.794	3.38265	35.812	62.1378	131.115	157.808							677.054	1.7606	43.9415	78.0531	92.6513	128.597	152.805						676.314	0.439055	44.5641	64.9802	84.2255	97.2508	113.276	132.522
678.534	2.50601	24.1019	85.794	146.97	182.275							678.534	2.72713	38.1061	65.8196	137.462	165.397							677.794	0.514751	49.8573	74.5654	97.6557	135.38	156.043						677.054	1.68724	46.4357	68.2964	90.2305	104.902	114.439	133.879
679.274	0.147763	24.3071	86.2938	154.487	192.536							679.274	1.18211	37.6797	70.4831	136.312	170.15							678.534	1.32671	49.0883	80.5608	99.9455	135.103	162.596						677.794	1.69133	49.6367	71.624	89.1255	104.936	123.982	139.939
680.014	3.40672	27.0316	89.0191	158.857	196.109							680.014	3.18454	40.1401	68.5047	144.86	176.705							679.274	2.14257	51.2	80.9743	103.139	142.887	171.701						678.534	3.24307	54.4688	72.0109	97.6606	111.739	124.342	144.317
680.753	2.96953	26.2803	92.2781	165.106	210.762							680.753	3.41496	41.128	67.5568	149.367	182.329							680.014	0.592473	55.0259	82.7241	107.46	143.453	174.261						679.274	2.73362	52.3821	76.172	97.8194	112.079	126.855	151.679
681.493	3.42363	28.0589	94.8941	168.13	209.139							681.493	3.20035	43.3908	73.9802	154.584	188.151							680.753	1.78172	57.6831	87.3041	112.991	148.328	178.097						680.014	1.85148	53.3226	76.355	100.35	117.458	134.417	153.154
682.233	2.76172	26.3483	98.153	173.167	218.698							682.233	2.23923	41.7243	74.7157	160.628	193.843							681.493	2.38166	59.3925	91.5449	115.957	156.594	185.174						680.753	2.44986	55.0847	81.8847	101.855	125.166	137.86	161.245
682.973	2.39621	30.5517	104.31	178.518	226.067							682.973	1.94692	41.9337	80.3479	161.819	199.035							682.233	2.5378	59.1904	94.2716	118.754	160.404	191.38						681.493	2.15838	58.1273	82.6137	110.598	124.218	142.527	163.441
683.712	2.2546	32.316	104.989	188.034	232.901							683.712	0.826688	47.497	78.2347	168.569	209.904							682.973	1.64739	63.2749	97.346	124.004	167.959	191.247						682.233	0.821052	64.4899	86.4343	113.977	131.219	148.909	171.077
684.452	1.35844	32.2253	110.336	193.427	234.331							684.452	1.35844	51.2435	83.3178	174.409	215.011							683.712	0.601228	67.2623	103.787	126.107	174.131	205.77						682.973	1.72228	63.6493	87.9109	115.243	135.086	150.212	174.174
685.191	2.95752	34.7319	113.372	193.528	242.062							685.191	-0.606671	50.7328	91.1523	179.195	221.738							684.452	0.150938	66.4127	105.808	132.297	177.654	213.124						683.712	2.85583	63.655	89.8084	120.095	140.011	150.006	183.149
685.931	4.04068	34.6126	114.969	203.864	250.827							685.931	3.04957	50.5467	92.707	189.683	228.718							685.191	0.530837	71.663	109.201	136.425	183.821	217.264						684.452	1.96219	67.2429	95.2419	122.335	146.033	160.523	186.786
686.67	4.14055	36.4982	121.686	209.711	261.545							686.67	5.21403	52.2169	96.3828	194.913	241.609							685.931	2.28718	74.4096	113.597	144.473	189.455	222.39						685.191	1.59251	70.2221	99.2665	126.415	154.17	166.986	192.39
687.409	2.77716	36.9516	127.981	217.235	268.458							687.409	1.23429	57.9345	98.049	201.267	242.23							686.67	4.06387	74.9133	114.479	147.22	193.302	230.337						685.931	-1.37231	73.5709	100.178	128.311	154.537	172.453	202.492
688.149	1.24187	36.1694	128.223	221.984	273.754							688.149	2.7942	59.2992	101.445	208.867	255.359							687.409	-0.848575	78.2232	120.266	154.209	200.264	241.304						686.67	0.306707	76.1401	105.277	138.248	163.092	176.203	207.488
688.888	1.79584	36.6195	138.202	230.024	281.713							688.888	3.20128	59.9654	113.372	215.579	263.052							688.149	2.87182	79.7125	122.557	160.512	211.583	254.117						687.409	1.62001	78.5318	108.926	142.252	170.024	186.147	215.307
689.627	2.74802	39.8071	145.096	241.433	294.117							689.627	1.88436	61.3201	112.826	226.987	273.938							688.888	2.42048	85.1853	129.769	166.935	220.654	261.88						688.149	-0.620934	82.9724	115.649	147.782	174.56	193.343	225.399
690.366	2.05199	41.5923	151.532	247.581	304.405							690.366	0.315691	67.6368	119.173	235.032	283.096							689.627	1.09921	90.6062	137.008	173.439	226.123	268.992						688.888	0.07808	85.5757	119.853	154.755	183.254	199.182	235.021
691.105	-0.792887	43.8467	150.966	259.115	316.838							691.105	2.61653	69.3776	122.739	239.769	294.32							690.366	0.55246	88.1568	140.246	181.365	237.873	282.07						689.627	2.74802	91.3128	123.033	161.898	189.378	211.048	243.239
691.845	3.5828	45.0636	157.882	268.71	324.363							691.845	2.54777	71.7356	128.264	255.414	300.398							691.105	1.58577	94.3536	150.173	187.994	242.861	287.184						690.366	2.92014	94.7863	132.511	167.237	197.307	221.221	250.975
692.584	2.31764	46.5925	163.513	278.756	332.94							692.584	0.799185	75.5229	134.902	260.854	314.239							691.845	1.3535	102.07	154.06	191.72	257.643	305.175						691.105	2.37866	100.3	136.297	174.832	203.058	224.863	264.904
693.323	0.160403	46.6772	173.155	285.356	343.021							693.323	1.12282	79.4795	137.225	272.765	329.467							692.584	0.479511	103.015	161.036	199.796	268.766	312.721						691.845	2.2293	98.4872	137.978	181.688	216.162	236.385	278.662
694.062	2.1726	53.3494	175.578	299.014	357.513							694.062	3.8624	79.501	147.978	284.61	338.282							693.323	0.882215	106.828	167.861	215.902	274.85	320.084						692.584	0.879103	108.369	146.091	192.044	224.891	245.43	283.471
694.8	2.09879	54.8916	180.819	301.661	367.289							694.8	2.50241	85.8892	149.337	299.159	355.504							694.062	-0.160933	117.723	174.773	220.318	287.024	330.637						693.323	1.04262	113.164	154.227	202.188	232.424	253.436	296.745
695.539	1.2956	54.9821	191.182	321.147	382.283							695.539	2.34828	88.5867	153.61	310.215	365.278							694.8	1.29157	115.192	171.859	228.204	297.302	351.79						694.062	2.73586	114.343	155.622	204.144	239.066	270.448	307.061
696.278	1.3809	57.0232	199.825	331.661	393.964							696.278	2.51812	90.1649	162.378	324.837	380.642							695.539	3.239	118.143	189.644	235.556	314.345	363.659						694.8	0.807229	117.452	161.042	214.561	248.223	274.458	319.098
697.017	3.91135	56.1441	202.738	338.169	406.862							697.017	5.3781	89.5536	168.921	326.923	393.09							696.278	1.13722	124.769	190.808	245.314	322.482	371.951						695.539	3.40095	128.588	171.991	227.216	256.691	289.729	331.836
697.756	3.35127	61.222	212.847	360.711	422.75							697.756	3.35127	98.7399	174.675	345.671	418.418							697.017	1.95567	130.46	202.249	252.363	338.82	387.549						696.278	-0.162459	129.643	182.767	233.616	276.749	302.743	343.52
698.494	2.29564	62.6383	225.055	368.451	437.812							698.494	3.68943	102.73	181.602	357.218	424.858							697.756	2.86084	137.484	203.283	267.529	347.96	405.422						697.017	0	133.801	184.485	237.533	278.032	308.752	361.8
699.233	2.30274	63.9832	234.879	379.623	454.791							699.233	0.822406	104.281	187.015	370.494	448.869							698.494	0.737885	137.001	215.79	269.328	361.646	420.677						697.756	1.0626	139.364	192.248	248.076	298.917	323.847	380.9
699.971	2.7218	71.5092	237.622	392.764	472.851							699.971	1.07222	112.666	196.712	384.186	455.448							699.233	0.082241	149.842	224.599	281.263	375.922	436.286						698.494	1.3118	144.953	205.624	258.014	301.795	335.82	386.816
700.71	7.11235	68.3116	247.443	413.922	487.113							700.71	2.06754	114.294	204.852	396.968	479.174							699.971	4.86625	153.081	234.322	296.347	395.816	456.355						699.233	-0.246722	151.323	210.207	264.486	317.284	343.93	407.831
701.448	3.31666	75.371	257.704	427.185	501.81							701.448	3.64832	119.565	215.085	407.617	494.43							700.71	2.15024	154.404	245.459	308.147	410.697	477.023						699.971	2.96924	159.844	222.775	277.294	327.688	357.463	412.724
702.187	1.41318	72.9035	268.504	441.993	524.706							702.187	2.07821	123.03	219.542	436.423	505.087							701.448	0.331666	164.092	256.875	323.042	419.972	499.24						700.71	0.99242	163.005	223.543	295.824	339.242	382.33	428.395
702.925	3.74931	79.5686	272.7	460.665	539.9							702.925	4.91576	126.893	229.708	450	532.402							702.187	2.99262	171.826	263.35	333.178	437.088	508.994						701.448	2.40458	168.735	235.068	304.552	355.794	385.976	448.744
703.664	2.25441	81.5764	290.986	480.19	560.848							703.664	3.92435	131.674	239.385	466.747	552.331							702.925	3.83263	175.301	271.95	348.102	450.833	521.737						702.187	1.33005	177.645	244.896	317.384	366.762	403.505	467.181
704.402	3.17937	84.4206	296.769	490.71	585.171							704.402	4.85272	133.45	245.23	479.332	566.262							703.664	1.41945	176.846	280.633	355.195	474.262	544.065						702.925	1.4164	180.467	253.37	327.856	376.93	417.256	483.577
705.14	4.35971	88.1165	303.168	501.954	604.826							705.14	3.94051	138.337	253.031	497.175	592.25							704.402	3.43037	188.67	294.259	369.727	488.2	564.589						703.664	2.83889	191.959	258.924	340.249	400.451	432.847	497.14
705.878	4.1164	90.0567	321.079	527.991	626.365							705.878	3.1083	145.922	259.081	508.753	606.455							705.14	-0.670725	197.277	305.767	380.301	495.749	590.406						704.402	3.51404	199.129	267.151	351.655	402.859	450.383	524.68
706.617	5.89267	94.5352	327.127	545.661	653.581							706.617	4.29323	154.64	265.759	530.593	640.617							705.878	-0.336033	205.4	316.459	394.67	521.775	609.311						705.14	2.6829	206.499	278.518	364.79	416.101	471.352	537.334
707.355	4.38687	96.1737	335.68	565.485	662.924							707.355	4.21814	158.096	285.568	546.587	658.79							706.617	2.86215	205.991	324.433	412.571	542.799	626.138						705.878	3.69636	210.02	289.408	381.061	438.523	481.955	554.958
708.093	3.80526	99.444	349.83	579.583	693.318							708.093	2.19859	160.751	290.214	569.605	674.291							707.355	1.01235	221.537	332.98	425.02	556.12	647.57						706.617	2.69379	220.386	299.263	391.105	454.745	503.318	577.313
708.831	3.64471	102.476	361.335	600.784	719.025							708.831	1.9495	165.029	298.188	584.256	705.125							708.093	2.53684	224.933	342.642	434.391	575.693	668.118						707.355	3.71197	228.117	310.118	400.724	473.36	517.229	598.639
709.569	2.80392	103.66	369.182	617.032	734.881							709.569	0.764705	170.954	309.196	604.287	724.685							708.831	4.49232	236.398	364.556	450.673	590.528	700.209						708.093	1.77579	233.304	321.671	415.619	484.113	533.497	621.525
710.307	3.83318	111.333	390.048	634.094	765.359							710.307	1.10736	183.311	317.813	633.497	749.089							709.569	1.95425	237.653	376.32	471.568	615.247	711.77						708.831	1.52569	242.67	337.517	429.907	507.971	548.572	637.147
711.045	6.14908	107.353	402.85	664.016	779.396							711.045	3.84318	186.522	331.965	641.896	762.999							710.307	3.57764	247.624	387.066	486.218	640.908	740.315						709.569	2.03921	253.202	346.496	449.137	530.45	572.254	671.156
711.782	3.93882	114.483	417.6	681.415	806.772							711.782	4.96633	192.488	341.906	669.171	788.448							711.045	2.73293	254.333	394.993	503.883	659.318	766.5						710.307	2.72582	256.312	350.523	465.348	535.027	588.181	685.458
712.52	0.772649	121.048	427.533	706.373	826.477							712.52	4.55004	193.592	357.05	693.667	819.695							711.782	4.02444	260.647	408.609	512.646	681.415	791.445						711.045	3.33075	265.606	370.653	475.444	557.261	608.332	704.326
713.258	3.70102	121.789	440.163	729.703	853.041							713.258	3.87316	198.65	361.409	713.522	847.188							712.52	3.17645	272.316	422.296	534.501	708.863	816.862						711.782	0.856264	274.69	375.215	492.609	570.101	621.049	731.336
713.996	4.31461	129.611	458.125	752.554	889.586							713.996	4.14203	203.65	373.214	733.484	869.825							713.258	1.03284	291.347	435.085	551.624	727.293	846.5						712.52	2.83305	285.365	392.248	509.777	587.042	649.283	747.667
714.733	4.15298	125.801	467.383	771.762	912.791							714.733	2.24953	217.772	383.978	768.129	897.736							713.996	3.88315	292.703	447.77	566.249	743.752	873.622						713.258	4.30351	296.598	408.919	515.818	602.921	680.643	781.861
715.471	3.03659	136.907	488.197	801.661	940.823							715.471	1.3014	216.379	393.629	779.016	935.618							714.733	4.93167	308.013	467.21	587.733	777.3	894.968						713.996	4.65978	303.921	415.756	535.184	637.009	694.911	807.005
716.209	3.30664	135.311	507.656	824.397	963.624							716.209	3.30664	225.461	413.33	801.164	958.055							715.471	0	312.682	473.969	605.67	799.752	918.352						714.733	1.81693	318.914	429.228	563.508	657.988	716.216	818.31
716.946	1.57152	142.31	515.11	844.17	989.361							716.946	2.44459	234.07	424.399	835.701	980.456							716.209	2.26244	325.356	498.954	625.738	823.005	950.572						715.471	2.77631	329.774	446.813	583.026	680.544	737.719	859.096
717.684	5.52081	148.448	532.977	874.303	1016.62							717.684	1.75264	240.374	436.67	858.88	1009.78							716.946	-0.087307	335.258	511.007	646.507	845.392	982.639						716.209	3.04559	332.665	455.707	598.153	696.221	770.273	879.131
718.421	1.49571	145.436	552.356	899.712	1048.49							718.421	3.43133	250.751	447.744	889.858	1045.76							717.684	0.788687	340.888	528.333	667.843	875.005	1007.68						716.946	3.7542	346.783	480.537	615.688	718.885	787.246	908.69
719.158	3.26875	150.627	558.073	924.349	1069.85							719.158	3.97551	259.998	461.335	912.069	1067.91							718.421	2.28755	350.172	547.077	687.146	899.36	1039.34						717.684	2.54133	356.399	487.847	633.053	740.051	814.1	943.445
719.896	1.59742	157.878	585.809	949.311	1111.18							719.896	2.75111	268.721	472.481	940.791	1116.33							719.158	3.26875	359.651	560.811	709.142	921.787	1074.98						718.421	3.69528	364.513	497.191	656.176	763.251	841.731	961.036
720.633	1.24862	163.659	602.103	982.04	1139.37							720.633	4.99448	273.537	481.165	965.095	1132.23							719.896	2.04115	371.4	573.651	723.276	953.482	1109.94						719.158	2.03193	383.68	515.225	671.419	788.033	867.013	995.29
721.37	3.76031	169.035	613.557	1008.03	1163.28							721.37	4.0289	277.278	501.375	989.946	1168.38							720.633	2.05131	384.932	586.049	749.351	986.054	1143.65						719.896	0.443728	387.818	531.763	688.931	807.939	885.946	1026.43
722.107	4.04199	172.907	640.252	1032.23	1213.5							722.107	2.15573	283.838	518.273	1021.91	1210.35							721.37	0.984843	397.16	610.782	760.12	1006.24	1176.26						720.633	3.12155	402.502	550.731	712.338	827.479	910.69	1057.58
722.845	0.53989	174.835	648.678	1060.7	1239.23							722.845	3.59927	290.731	536.561	1056.66	1240.94							722.107	3.14377	408.151	623.185	789.177	1041.31	1209.54						721.37	2.50687	416.32	566.285	736.305	849.562	936.765	1089.24
723.582	1.5365	182.03	677.506	1090.28	1270.69							723.582	2.34994	302.781	540.125	1079.71	1280.81							722.845	1.16976	412.656	638.6	804.797	1071.5	1238.87						722.107	1.70662	424.05	582.586	759.086	880.346	966.216	1111.37
724.319	0.543687	185.035	688.851	1114.29	1314.63							724.319	7.24916	310.264	558.276	1103.05	1303.67							723.582	1.89803	435.733	662.051	834.5	1107.55	1280.18						722.845	1.88962	433.442	599.458	771.414	902.247	997.088	1145.92
725.056	2.44664	189.57	702.821	1153.73	1337.86							725.056	5.16514	312.446	570.34	1134.97	1352.27							724.319	2.35598	443.014	672.903	858.753	1135.76	1312.37						723.582	1.71727	448.116	615.504	798.98	923.798	1036.41	1183.47
725.793	3.44369	198.828	720.003	1188.07	1371.95							725.793	4.2593	322.076	587.512	1173.3	1374.21							725.056	2.62788	445.47	701.281	871.458	1160.25	1345.93						724.319	2.89966	450.988	633.576	818.883	953.264	1051.22	1216.68
726.53	4.43796	194.546	741.773	1209.93	1406.29							726.53	1.99255	337.104	590.248	1189.64	1418.52							725.793	-2.44683	466.801	715.2	905.237	1191.97	1380.47						725.056	4.44021	467.762	649.357	838.746	969.505	1081.51	1253.13
727.266	3.2662	203.139	758.121	1234.71	1436.4							727.266	5.71584	337.416	612.775	1229.9	1439.76							726.53	1.90198	467.616	734.618	917.389	1217.72	1414.26						725.793	2.35621	485.379	668.438	855.213	1005.1	1108.32	1275.89
728.003	3.08366	206.968	778.625	1269.65	1465.19							728.003	2.72088	345.008	625.984	1260.49	1479.34							727.266	0.181455	478.589	745.963	944.385	1243.24	1451.46						726.53	3.71339	493.428	688.789	878.625	1030.87	1128.96	1310.01
728.74	0.543481	209.965	794.298	1300.28	1504.27							728.74	0.452901	355.89	629.895	1283.34	1505.08							728.003	3.62784	494.747	763.207	962.466	1272.92	1492.67						727.266	3.90129	501.089	704.773	907.186	1053.08	1156.42	1339.78
729.477	5.69983	207.908	811.185	1332.4	1531.54							729.477	2.62373	359.632	644.443	1321.55	1547.55							728.74	0.634061	504.532	783.519	992.216	1308.61	1525.91						728.003	7.07429	521.23	710.512	926.369	1075.65	1193.11	1380.57
730.213	3.43829	212.993	822.023	1360.3	1559.08							730.213	3.8907	353.873	663.681	1341.02	1579.8							729.477	3.70941	520.946	797.343	1010.05	1324.26	1555.87						728.74	4.61959	528.445	731.435	938.139	1114.77	1218.58	1407.8
730.95	1.99166	216.639	837.947	1383.75	1604.74							730.95	5.43181	375.247	671.643	1365.92	1608.18							730.213	2.35251	524.701	813.608	1028.95	1359.39	1585.23						729.477	2.44278	533.613	741.068	965.081	1125.58	1248.08	1445.59
731.687	-0.180937	220.2	853.297	1418.81	1637.84							731.687	4.88529	383.314	690.183	1393.48	1651.86							730.95	2.17272	537.025	826.992	1049.7	1386.92	1604.65						730.213	2.8954	553.384	763.572	982.446	1148.12	1274.97	1475.66
732.423	6.0528	227.567	876.843	1438.67	1664.79							732.423	3.16191	391.716	695.801	1425.84	1683.31							731.687	0.271405	545.524	844.793	1073.86	1426.87	1646.16						730.95	-0.36212	565.542	775.843	1000.72	1163.13	1287.61	1510.31
733.16	2.35058	230.628	880.292	1472.46	1694.13							733.16	1.3561	397.429	707.163	1453.65	1706.61							732.423	1.62613	560.833	860.311	1082.19	1442.46	1679.06						731.687	1.80937	574.474	785.898	1024.37	1200.6	1317.58	1537.51
733.896	2.71555	233.447	901.109	1493.55	1744.2							733.896	2.26296	401.358	731.75	1473	1739.22							733.16	3.79709	566.851	876.676	1114.72	1475.71	1724.33						732.423	1.62613	589.651	800.686	1044.24	1217.97	1346.79	1564.15
734.632	4.07552	229.225	914.004	1518.09	1753.47							734.632	3.89439	400.126	736.673	1500.43	1775.3							733.896	1.81037	567.278	889.704	1122.06	1501.61	1747.36						733.16	2.44099	590.809	819.81	1060.38	1237.04	1378.16	1592.79
735.369	3.34795	233.542	927.02	1542.59	1789.52							735.369	2.62407	409.355	734.83	1523.41	1808.16							734.632	3.71325	582.8	904.947	1142.6	1519.45	1772.67						733.896	3.34917	598.054	821.725	1081.33	1258.84	1394.25	1628.69
736.105	2.08598	233.448	938.691	1579.45	1807.27							736.105	3.4464	410.394	747.506	1541.54	1836.39							735.369	3.43844	588.244	918.786	1150.52	1548.38	1801.11						734.632	0.996239	616.762	849.882	1093.87	1282.16	1415.11	1659.55
736.841	2.90388	243.563	945.304	1587.51	1839.52							736.841	2.17791	417.705	759.092	1567.46	1858.57							736.105	2.81154	597.044	924.27	1186.2	1569.11	1847.45						735.369	4.52426	621.452	853.275	1114.78	1298.82	1446.59	1682.21
737.578	1.36483	241.665	966.662	1613.04	1861.35							737.578	5.36832	423.279	762.848	1600.03	1885.46							736.841	0.816716	602.101	941.492	1191.14	1605.03	1869.55						736.105	4.08126	623.708	870.942	1126.79	1327.14	1462.63	1706.15
738.314	3.097	246.029	971.275	1630.75	1888.72							738.314	6.10292	427.842	769.423	1605.89	1923.24							737.578	1.00087	613.899	955.106	1210.33	1621.6	1899.38						736.841	0.362985	629.325	880.148	1141.04	1340.5	1480.53	1735.89
739.05	1.72946	245.402	981.243	1665.56	1918.52							739.05	2.27561	427.724	788.544	1625.42	1937.91							738.314	-0.455441	613.571	963.077	1215.48	1644.33	1924.97						737.578	2.45669	633.644	893.325	1153.83	1347.54	1506.31	1753.26
739.786	4.65785	253.076	989.473	1683.58	1946.8							739.786	1.36996	431.445	789.094	1640.93	1959.13							739.05	4.18712	621.515	976.419	1235.02	1654.28	1953.11						738.314	2.55047	641.262	904.507	1169.85	1363.23	1526.46	1790.43
740.522	2.65535	244.292	1002.35	1705.19	1962.31							740.522	2.93004	436.119	789.647	1666.92	1971.1							739.786	2.28326	632.645	983.08	1251.23	1666.05	1970.63						739.05	6.28068	651.098	910.426	1175.4	1390.12	1538.4	1797.91
741.258	3.39955	251.75	996.067	1706.57	1977.71							741.258	4.9615	439.368	792.37	1684.8	1992.59							740.522	2.47222	632.89	983.396	1256.81	1684.59	1990.14						739.786	2.1006	648.263	917.779	1192.87	1400.82	1557.82	1840.49
741.994	-0.920454	249.443	1006.7	1731.47	2004.01							741.994	5.0625	441.726	792.327	1706.34	2022.7							741.258	5.32902	633.694	996.527	1262.52	1717.51	2018.04						740.522	3.20474	655.872	918.661	1209.47	1414.66	1568.76	1847.3
742.73	3.49839	247.005	1012.78	1741.46	2010.93							742.73	1.19682	439.877	794.411	1714.12	2033.95							741.994	1.19659	635.758	1006.15	1270.32	1730.64	2033.1						741.258	3.12391	657.215	923.207	1211.53	1436.35	1588.32	1875.91
743.466	6.74294	245.332	1017.17	1750.12	2021.59							743.466	3.51002	435.612	801.024	1722.87	2061.4							742.73	2.20951	641.403	997.502	1280.14	1726	2056.23						741.994	5.24659	671.563	935.549	1216.93	1420.08	1605.73	1884.54
744.201	1.48524	244.786	1020.64	1754.34	2054.36							744.201	2.97047	441.116	811.497	1745.06	2072.65							743.466	3.14055	642.426	1009.69	1286.42	1752.15	2052.72						742.73	3.2222	669.298	935.544	1225.36	1448.24	1608.34	1901.1
744.937	2.23648	247.318	1017.6	1790.86	2067.35							744.937	3.26154	440.121	807.557	1760.11	2095.49							744.201	4.17723	644.407	1003.37	1294.48	1752.49	2082.12						743.466	4.1566	670.229	940.501	1239.41	1455.18	1625.51	1921.18
745.673	3.54533	247.52	1026.65	1796.92	2077							745.673	3.91852	438.128	814.493	1756.62	2100.89							744.937	5.87077	649.233	1016.58	1298.75	1788.26	2099.97						744.201	3.43461	672.905	935.514	1244.07	1460.08	1638.59	1931.18
746.408	3.64506	243.939	1032.3	1802.16	2091.42							746.408	2.14965	439.557	809.764	1766.17	2113.11							745.673	3.63863	643.011	1020.22	1317.46	1787.87	2110.78						744.937	-0.186374	674.393	952.463	1253.46	1485.4	1644.75	1939.96
747.144	0.281779	247.59	1038.17	1814.47	2116.26							747.144	2.44209	447.747	807.016	1783.1	2139.74							746.408	0.841168	648.54	1025.66	1308.67	1809.26	2137.03						745.673	-1.67937	673.52	952.575	1246.18	1490.07	1658.38	1973.72
747.879	2.36077	246.653	1041.95	1831.01	2128.85							747.879	1.2276	440.425	805.589	1806.65	2144.81							747.144	2.34816	639.639	1017.22	1326.15	1810.15	2141.24						746.408	0.841168	676.579	962.576	1267.45	1487.56	1669.16	1972.54
748.615	4.54302	241.253	1046.03	1848.35	2137.4							748.615	5.39484	442.755	810.551	1791.37	2162.57							747.879	2.64406	647.323	1030.71	1329.11	1810.33	2168.6						747.144	1.50282	676.74	954.293	1271.2	1490.71	1679.31	1991.71
749.35	3.41568	244.885	1040.07	1851.87	2165.25							749.35	1.99248	436.732	814.923	1811.35	2164.78							748.615	1.13576	650.788	1030.79	1335.74	1820.9	2162.67						747.879	0.849877	676.502	958.661	1266.51	1495.12	1687.29	2010.15
750.086	5.14287	240.382	1039.81	1874.67	2167.62							750.086	2.57144	434.858	807.145	1818	2184.96							749.35	1.4232	651.54	1036.09	1332.68	1827.01	2186.13						748.615	1.04111	682.116	956.779	1281.79	1503.74	1700.7	2032.34
750.821	4.20712	240.858	1045.76	1875.99	2186.75							750.821	3.53781	434.863	817.138	1832.2	2206.54							750.086	2.85715	654.097	1028.1	1341.15	1848.67	2209.53						749.35	-0.759039	676.399	957.433	1267.97	1511.25	1708.22	2009.18
751.556	2.98131	242.928	1051.25	1882.94	2203.76							751.556	3.17365	438.252	806.588	1839.37	2204.92							750.821	-0.191233	648.184	1034.47	1340.54	1852.28	2209.31						750.086	6.47621	682.954	974.003	1275.91	1533.24	1708.48	2044.58
752.292	1.54453	233.803	1054.33	1883.84	2200.47							752.292	1.35146	434.302	794.371	1852.08	2222.1							751.556	1.05788	638.481	1029.42	1343.8	1869.09	2226.65						750.821	4.11151	676.486	965.534	1271.32	1519.73	1709.81	2052.69
753.027	1.35534	238.055	1040.61	1895.05	2206							753.027	4.64687	430.223	804.973	1841.13	2224.59							752.292	3.66826	649.475	1029.62	1350.02	1860	2229.63						751.556	5.6741	678.969	966.809	1284.46	1527.2	1732.14	2060.66
753.762	4.27541	230.775	1045.14	1893.04	2210							753.762	4.56692	426.181	791.243	1855.43	2227.2							753.027	2.22662	641.655	1021.83	1333.84	1878.69	2231.66						752.292	2.02719	674.477	966.779	1279.06	1526.77	1725.24	2070.15
754.497	5.576	235.072	1037.23	1895.45	2220.13							754.497	6.94554	429.547	783.966	1856.02	2221.5							753.762	1.06885	637.717	1033.48	1341.22	1867.19	2237.89						753.027	3.29153	680.088	961.321	1283.21	1533.47	1732.12	2072.6
755.232	0.590098	230.138	1031.79	1904.25	2208.84							755.232	5.70428	424.674	786.208	1839.83	2228.31							754.497	7.14119	639.772	1023.05	1343.62	1872.75	2250.94						753.762	1.94337	670.268	955.361	1275.34	1532.15	1719.98	2087.67
755.967	1.47846	227.584	1025.16	1888.98	2210							755.967	4.82964	420.967	767.124	1845.81	2213.06							755.232	3.93399	630.618	1014.38	1339.23	1859.1	2255.65						754.497	2.34779	666.772	952.908	1272.6	1515.89	1720.73	2076.23
756.702	0.988844	224.764	1013.37	1872.38	2207							756.702	4.15315	407.602	770.013	1835	2212.94							755.967	1.87272	624.699	1007.13	1326.77	1845.91	2239.97						755.232	2.36039	665.237	945.534	1271.27	1515.86	1717.97	2076.75
757.437	1.68993	217.802	1007.69	1874.03	2206.55							757.437	5.2686	406.975	767.228	1824.63	2210.63							756.702	4.54868	619.116	993.69	1315.76	1849.73	2228.26						755.967	0.887076	663.927	941.68	1271.77	1511.68	1706.34	2074.38
758.172	3.59766	211.462	999.15	1876.68	2182.98							758.172	3.9974	408.135	749.612	1799.13	2213.16							757.437	1.09348	610.462	986.919	1302.84	1829.99	2222.95						756.702	3.26319	651.055	925.558	1249.6	1495.92	1694.68	2066.59
758.907	1.20725	213.683	991.15	1865.7	2180.69							758.907	3.11872	399.901	740.445	1802.52	2190.35							758.172	2.29851	602.908	974.466	1298.16	1826.21	2204.87						757.437	4.27453	643.267	912.164	1230.47	1489.62	1702.95	2046.5
759.642	4.24308	206.093	978.333	1847.05	2182.76							759.642	4.64719	390.465	733.649	1788.26	2171.75							758.907	0.704227	597.587	968.413	1280.59	1815.6	2186.93						758.172	7.89487	637.186	912.706	1225.8	1481.84	1683.21	2042.97
760.376	6.18864	207.269	967.862	1824.73	2156.69							760.376	4.36248	387.855	719.404	1763.66	2156.49							759.642	1.41436	592.415	949.036	1264.34	1803.31	2183.37						758.907	4.82899	624.851	903.825	1222.64	1463.99	1673.04	2036.22
761.111	2.75496	203.459	950.563	1816.44	2156.62							761.111	2.65292	380.184	711.392	1751.64	2140.91							760.376	-0.405812	579.703	951.122	1253.25	1789.12	2163.18						759.642	-1.61641	625.046	892.967	1199.18	1445.98	1664.9	2022.03
761.846	1.33192	198.661	945.357	1811.52	2137.74							761.846	5.94242	370.992	694.649	1736.21	2117.45							761.111	4.38753	570.991	931.176	1246.06	1777.26	2146.52						760.376	3.75376	611.66	889.642	1183.65	1437.39	1645.57	2008.87
762.58	2.1607	195.08	924.986	1784.84	2126.64							762.58	6.4821	366.393	682.987	1722.8	2118.41							761.846	0.9221	560.739	921.383	1235.82	1752.5	2125.95						761.111	-0.102036	598.234	870.771	1172.39	1424.42	1637.98	1981.53
763.315	1.6533	191.266	920.991	1787.94	2106.61							763.315	0.723318	361.246	681.883	1719.95	2102.89							762.58	2.77805	552.625	901.836	1203.61	1729.9	2106.58						761.846	0.512278	596.394	857.553	1169.12	1415.63	1610.81	1963.97
764.049	3.93058	184.324	901.345	1745.08	2088.69							764.049	2.68935	358.097	666.751	1693.25	2091.17							763.315	3.61659	547.655	894.642	1182.94	1721.29	2085.74						762.58	1.74914	592.444	841.748	1152.48	1393.55	1591.41	1949.67
764.784	3.53521	182.479	892.226	1746.6	2076.73							764.784	3.11931	349.05	657.55	1670.7	2047.62							764.049	0.930928	541.283	888.932	1187.35	1707.22	2078.24						763.315	3.20327	575.761	843.803	1120.73	1360.77	1571.46	1945.11
765.518	0.627602	184.934	885.652	1728.42	2050.59							765.518	4.49782	348.319	649.255	1664.82	2041.59							764.784	3.32726	537.665	879.749	1154.14	1676.73	2065.71						764.049	6.72337	576.761	823.25	1119.08	1350.26	1559.1	1916.78
766.252	5.46055	178.833	867.702	1690.35	2038.15							766.252	5.9856	335.614	634.579	1639.32	2023.66							765.518	0.1046	520.596	857.828	1148.93	1655.09	2042.32						764.784	4.47101	561.891	817.778	1101.64	1329.14	1553.21	1896.02
766.987	1.36965	172.155	857.403	1689.84	2012.65							766.987	5.79468	326.504	616.344	1607.45	2001.48							766.252	4.09541	513.817	840.399	1132.75	1647.83	1998.56						765.518	5.96222	551.035	800.298	1088.37	1323.09	1527.69	1879.67
767.721	0	167.559	834.212	1678.55	2000.38							767.721	4.42888	318.774	610.131	1596.82	1964.21							766.987	-1.79108	505.823	828.745	1111.53	1615.56	1985.15						766.252	3.57036	544.06	788.314	1072.89	1321.56	1507.95	1846.19
768.455	4.03028	159.62	836.284	1649.34	1970.28							768.455	1.27272	314.044	607.194	1580.93	1945.35							767.721	0.738147	491.395	815.02	1085.6	1591.55	1965.9						766.987	3.16074	532.163	771.957	1049.58	1290.53	1478.28	1829.01
769.189	5.00762	156.302	806.973	1615.22	1940.72							769.189	5.22071	311.325	583.761	1544.48	1925.16							768.455	5.51513	491.589	798.951	1080.65	1564.39	1933.58						767.721	5.06158	527.143	758.394	1039.73	1260.97	1451.51	1802.13
769.923	5.78743	157.761	794.164	1596.79	1922.28							769.923	1.82197	300.518	581.744	1524.67	1884.13							769.189	1.06545	472.954	778.205	1048.51	1551.72	1912.27						768.455	1.90908	520.119	756.421	1017.01	1244.19	1440.4	1785.63
770.657	2.79901	153.946	777.371	1574.01	1909.14							770.657	2.36839	298.095	560.879	1495.86	1849.39							769.923	2.57219	470.818	768.549	1028.02	1513.95	1879.41						769.189	2.1309	505.876	731.752	1008.02	1221.65	1410.55	1749.9
771.391	2.3704	149.227	762.299	1546.9	1856.35							771.391	3.01687	288.111	541.205	1460.92	1820.25							770.657	1.50716	454.409	752.288	1007.75	1484.88	1839.06						769.923	1.17892	495.79	713.247	984.506	1203.25	1384.05	1727.44
772.125	6.05117	147.173	746.888	1513.55	1828.43							772.125	2.70142	279.11	531.963	1432.07	1777.53							771.391	1.50844	440.14	728.575	988.134	1457.58	1799.03						770.657	-2.79901	480.676	702.444	963.075	1180.64	1354.72	1699.75
772.859	3.37272	141.654	731.336	1492.37	1785.58							772.859	0.870379	274.713	520.378	1411.21	1754.79							772.125	2.91753	430.39	710.256	962.244	1430.02	1767.81						771.391	0.323236	470.201	681.382	944.066	1142.21	1332.6	1664.13
773.593	2.18868	135.48	713.402	1444.86	1752.15							773.593	2.73586	267.348	500.333	1378.98	1713.63							772.859	2.93753	426.159	691.516	947.081	1400.77	1729.55						772.125	4.10615	459.241	668.763	919.67	1141.51	1297	1628.63
774.327	3.95101	136.858	698.121	1438.83	1702.45							774.327	4.60951	262.632	495.412	1352.67	1673.58							773.593	2.51699	420.556	673.787	922.968	1370.99	1688.79						772.859	-0.326392	451.074	655.178	897.579	1092	1261.61	1588.55
775.061	0.879446	129.279	678.492	1388.75	1674.13							775.061	5.16674	254.05	467.535	1308.4	1632.91							774.327	0.658501	403.222	658.611	901.378	1333.9	1640.11						773.593	2.73586	434.782	637.892	877.663	1072.67	1233.43	1555.28
775.794	1.76546	120.603	662.156	1363.04	1641.32							775.794	3.19989	245.288	465.087	1267.6	1603.92							775.061	2.74827	391.243	642.105	877.907	1311.25	1620.05						774.327	2.63401	420.782	618.991	847.381	1041.42	1213.4	1513.57
776.528	0	125.944	640.456	1330.6	1593.56							776.528	2.10276	236.505	447.666	1232.55	1543.43							775.794	3.53091	379.132	621.551	848.964	1272.45	1579.97						775.061	8.13487	404.325	600.551	821.512	1017.3	1172.08	1486.04
777.262	7.01444	117.019	617.605	1300.79	1561.21							777.262	1.44742	228.916	436.231	1207.6	1509.33							776.528	2.65612	362.117	607.033	824.392	1222.04	1540.88						775.794	5.07569	408.703	588.228	804.165	992.517	1154.06	1440.5
777.995	7.26863	116.074	595.916	1243.27	1520.82							777.995	5.59125	216.158	421.245	1166.89	1475.64							777.262	2.89485	348.606	586.095	805.213	1194.12	1485.61						776.528	0.996044	388.125	566.085	786.985	961.404	1113.25	1396.79
778.729	0.784443	108.477	591.246	1220.59	1491.45							778.729	2.01714	214.937	408.695	1134.64	1432.95							777.995	2.2365	347.105	565.723	788.59	1159.18	1443.66						777.262	3.22887	376.442	544.009	755.333	927.019	1077.22	1361.47
779.462	1.34549	109.545	569.143	1196.25	1449.99							779.462	2.91523	200.366	390.417	1103.64	1385.07							778.729	5.4911	326.777	555.274	755.195	1118.73	1404.94						777.995	4.69665	367.457	531.84	734.691	901.31	1047.58	1332.51
780.196	1.23978	100.535	543.814	1168.21	1379.54							780.196	2.9304	199.042	372.95	1076.47	1346.07							779.462	0.78487	315.182	535.842	729.145	1097.02	1358.16						778.729	3.81015	352.887	506.302	714.404	880.481	1029.75	1290.07
780.929	4.98933	100.24	523.085	1114.43	1352.67							780.929	0.90715	194.697	362.973	1030.41	1305.84							780.196	3.60664	309.382	513.383	701.38	1067.34	1324.65						779.462	0.448497	344.67	492.338	696.741	853.715	986.022	1237.4
781.662	3.9868	96.4805	510.082	1081.11	1305.96							781.662	0.911268	181.57	356.648	994.079	1258.23							780.929	3.51521	293.463	493.149	685.352	1025.19	1275.45						780.196	0.112708	335.643	474.95	659.452	827.612	957.001	1196.96
782.396	0.798171	88.7111	489.621	1059.4	1267.61							782.396	3.53476	179.247	333.18	967.27	1217.9							781.662	0.683451	285.569	478.302	665.34	989.295	1237.62						780.929	1.36072	316.936	463.327	643.396	799.199	928.922	1163.19
783.129	1.36881	87.1473	478.511	1013.03	1235.23							783.129	3.65015	173.268	328.285	930.559	1172.27							782.396	2.05244	271.606	464.308	639.107	960.884	1191.9						781.662	-2.05035	305.161	454.153	631.395	767.06	900.447	1131.57
783.862	4.92307	84.0356	457.845	985.987	1196.65							783.862	1.60286	164.522	313.13	903.783	1131.05							783.129	2.16728	265.776	442.923	611.742	928.962	1147.97						782.396	-0.342073	306.156	429.644	597.944	746.404	858.376	1105.24
784.595	2.42025	82.6342	439.679	945.626	1155.38							784.595	4.8405	155.703	305.297	865.873	1090.5							783.862	-0.34347	256.686	430.139	595.119	891.189	1103.34						783.129	1.0266	286.651	418.854	576.723	720.79	832.462	1062.99
785.328	3.24988	80.8988	434.091	924.127	1115.52							785.328	2.08921	151.816	294.927	839.398	1059							784.595	2.65075	243.984	409.944	580.86	856.653	1077.7						783.862	0.11449	279.813	399.226	553.215	691.748	808.642	1019.07
786.061	4.06709	77.5072	419.143	886.394	1081.38							786.061	1.51063	146.88	276.214	810.165	1022.47							785.328	3.48202	239.795	398.459	546.56	830.809	1039.15						784.595	3.688	265.075	388.853	541.56	654.044	772.175	992.418
786.794	1.86026	71.0386	397.281	855.603	1047.56							786.794	7.09223	142.31	275.202	786.192	991.401							786.061	1.85924	230.895	382.772	526.166	806.911	1010.03						785.328	-0.232134	255.116	372.924	510.347	644.637	745.616	947.224
787.527	3.73606	70.6348	378.159	833.141	1006.17							787.527	2.45179	133.681	260.006	754.333	960.867							786.794	3.48798	226.486	365.773	512.85	775.263	962.916						786.061	4.76431	247.163	357.904	495.604	628.308	722.432	918.698
788.26	0.703611	67.1949	369.748	799.419	973.094							788.26	1.05542	130.52	248.961	715.103	919.385							787.527	1.28427	215.29	356.326	488.606	744.76	933.781						786.794	-1.74399	242.299	345.194	479.249	600.05	700.504	883.739
788.993	0.708074	67.7391	356.751	766.49	933.124							788.993	1.41615	125.919	238.267	685.416	881.08							788.26	2.69718	205.923	344.3	472.358	711.116	894.407						787.527	1.05077	227.666	334.144	456.266	573.018	667.82	853.572
789.726	0.59216	62.8873	345.466	742.923	895.819							789.726	1.77648	122.577	227.745	666.772	834.471							788.993	1.8882	193.422	324.298	454.466	692.378	860.31						788.26	0.586342	218.354	325.42	440.812	548.348	637.941	813.492
790.458	1.6596	59.8643	329.906	717.186	869.514							790.458	3.20066	116.054	222.624	635.273	803.723							789.726	-1.53961	191.149	315.621	430.618	660.258	823.22						788.993	5.42857	207.23	313.323	432.987	525.509	625.583	777.701
791.191	5.93511	53.2973	316.341	687.286	838.156							791.191	1.78053	111.936	218.649	620.456	772.158							790.458	-0.118543	187.298	300.27	418.22	634.087	788.786						789.726	5.68473	201.69	294.422	407.169	509.376	596.897	757.609
791.924	3.45534	56.8344	308.478	652.106	802.473							791.924	3.93194	104.375	203.865	592.055	752.787							791.191	6.17251	176.273	290.82	409.997	609.298	763.849						790.458	8.17948	198.678	286.163	398.068	483.3	571.259	718.49
792.656	6.72393	52.7108	287.808	629.408	774.213							792.656	5.88344	100.499	200.517	565.171	722.703							791.924	1.90639	167.286	279.168	388.07	594.08	735.868						791.191	6.52862	188.262	271.353	387.8	471.01	547.811	696.901
793.389	2.53424	50.2021	287.697	611.718	741.809							793.389	2.05153	98.9561	190.068	545.827	686.538							792.656	5.28309	162.095	267.997	365.974	561.569	705.293						791.924	5.12343	180.75	262.725	370.675	453.484	523.901	664.14
794.121	2.7816	47.5291	268.848	573.493	721.16							794.121	5.20038	98.4445	178.143	527.295	662.505							793.389	-1.0861	148.072	254.39	354.794	539.311	676.039						792.656	3.2419	172.661	247.585	349.645	434.414	503.815	643.577
794.854	6.0575	49.0658	257.565	562.985	685.467							794.854	4.6037	89.4088	171.67	502.167	645.367							794.121	2.66066	149.36	243.451	337.662	512.056	651.499						793.389	0.724069	164.967	235.926	334.278	414.288	479.937	617.872
795.586	-1.94091	47.067	245.646	537.267	656.148							795.586	3.03267	87.826	164.249	483.407	614.782							794.854	2.54415	138.838	236.848	327.226	502.894	621.015						794.121	0.725635	159.519	229.301	324.117	398.374	464.406	586.192
796.318	3.05052	46.0018	239.771	516.635	635.85							796.318	1.95233	78.9474	156.797	462.824	582.161							795.586	2.54744	138.047	222.234	307.027	475.279	589.065						794.854	1.09035	151.68	217.828	310.144	381.017	446.317	570.617
797.051	9.58839	43.0248	227.786	509.414	598.66							797.051	-0.61464	85.9267	149.112	443.033	560.921							796.318	1.22021	126.169	221.956	302.245	460.628	574.839						795.586	-1.33437	147.509	211.074	295.624	366.831	426.757	544.06
797.783	1.48381	37.7135	222.819	480.383	582.519							797.783	4.94603	77.4054	146.526	419.176	534.419							797.051	3.19613	124.772	204.675	291.463	442.418	546.661						796.318	2.80647	146.303	205.605	280.281	348.613	406.085	520.052
798.515	5.19456	37.8461	209.638	461.698	567.197							798.515	2.84464	73.837	145.077	408.268	514.756							797.783	3.70952	113.759	193.761	276.978	419.918	529.596						797.051	3.31906	135.344	198.652	271.917	330.308	394.476	503.759
799.247	-1.1144	42.9661	204.182	441.424	537.139							799.247	3.59083	69.7116	131.622	395.982	495.411							798.515	6.43136	113.909	188.612	274.199	402.208	497.317						797.783	4.57508	131.441	187.207	262.511	319.019	372.807	485.082
799.979	8.95509	34.8253	197.136	421.635	512.554							799.979	4.85067	66.9144	130.346	367.034	480.092							799.247	5.07669	108.22	187.218	258.54	382.114	483.524						798.515	3.83408	120.588	180.078	251.565	305.984	362.012	453.411
800.711	1.12685	32.6785	187.182	403.536	493.809							800.711	4.63259	66.1083	125.33	355.457	451.99							799.979	2.23877	108.705	175.992	244.399	368.651	461.063						799.247	9.41045	121.593	169.017	241.948	299.153	347.072	443.529
801.443	0.37886	32.582	181.095	392.625	473.828							801.443	2.02059	59.7336	117.32	340.848	436.068							800.711	1.12685	98.1608	169.653	232.881	346.317	446.481						799.979	1.99002	110.197	168.654	226.613	278.105	329.348	421.262
802.175	3.03567	27.4475	167.847	369.719	455.097							802.175	2.78269	59.7015	115.608	327.346	415.507							801.443	2.90459	99.5139	161.394	222.138	336.807	424.197						800.711	3.25533	105.297	155.004	220.486	271.82	314.265	404.412
802.907	2.78323	32.0071	160.162	361.061	437.346							802.907	0.885572	55.7911	104.877	312.607	393.321							802.175	-0.632431	93.2203	154.946	215.532	330.508	406.653						801.443	1.8943	102.797	151.923	205.216	259.645	308.14	387.826
803.639	4.05101	30.256	155.584	344.969	417.507							803.639	2.91166	48.4855	100.769	296.863	382.188							802.907	3.54229	85.774	149.156	198.621	305.776	386.236						802.175	4.30053	102.96	147.609	206.931	247.533	293.574	367.822
804.371	2.67619	29.693	148.465	325.349	401.557							804.371	-2.16644	55.1806	97.4899	288.137	369.315							803.639	2.65848	82.2862	141.659	198.753	294.078	368.136						802.907	5.81948	97.0334	135.872	196.977	232.906	277.564	354.735
805.103	6.2982	23.3933	141.388	312.853	376.735							805.103	2.18509	50	96.6581	275.321	348.2							804.371	0.509751	83.4718	137.888	186.442	283.167	356.826						803.639	2.78507	87.8563	131.531	184.827	233.946	270.278	336.234
805.834	0.775871	24.6985	135.907	292.891	363.495							805.834	3.75004	44.8712	86.1216	265.348	337.504							805.103	-2.05655	71.5938	129.691	183.676	269.537	340.488						804.371	2.67619	88.4418	123.36	180.452	218.046	259.463	325.221
806.566	1.55597	25.6734	135.369	282.408	360.206							806.566	0	44.9934	85.4485	251.029	323.9							805.834	4.52591	72.6732	122.975	173.148	261.727	325.478						805.103	-1.54242	85.2185	116.452	175.321	208.869	251.028	309.126
807.298	2.58977	26.1567	123.532	275.422	332.785							807.298	6.99238	37.9401	85.5919	236.317	307.276							806.566	3.11193	70.9261	121.106	172.583	248.825	321.955						805.834	0.387935	80.9492	113.148	161.122	198.623	226.166	297.934
808.029	2.46113	27.3315	118.652	266.19	325.257							808.029	1.68393	40.1552	79.0151	228.367	288.988							807.298	-0.776931	69.9238	118.223	160.954	236.705	300.284						806.566	0.259328	78.317	112.289	153.781	186.716	230.802	286.298
808.761	1.17423	19.9618	113.639	244.5	301.776							808.761	3.13127	39.9237	82.8481	219.841	274.638							808.029	0.518132	64.2484	105.828	151.295	226.553	291.708						807.298	3.23721	73.161	106.051	150.984	185.298	210.419	273.739
809.492	5.40413	22.9346	109.137	238.968	295.646							809.492	0.131808	37.8289	71.0446	209.838	267.043							808.761	4.30549	65.1043	102.158	144.43	213.709	277.117						808.029	2.07253	66.7095	97.0202	139.896	174.87	204.014	266.32
810.223	8.89529	17.6578	104.221	230.481	278.542							810.223	5.17786	35.1829	71.0295	205.388	253.848							809.492	8.96295	63.3997	103.997	136.421	208.916	255.049						808.761	-1.95704	67.0613	94.7208	134.905	165.566	196.096	251.806
810.955	7.03987	18.0646	104.535	223.948	267.117							810.955	1.99242	41.3094	70.3987	192.202	244.669							810.223	4.91232	61.0721	94.3963	134.226	203.662	249.732						809.492	3.03159	63.7951	94.2428	132.072	157.774	183.609	238.836
811.686	1.58962	19.7378	94.9797	211.287	259.903							811.686	1.98702	34.8391	65.5717	183.468	234.071							810.955	1.59393	54.1937	91.6511	127.647	187.951	241.215						810.223	-1.19489	60.1428	87.4925	120.02	154.008	179.366	225.834
812.417	4.38167	21.9083	95.2017	199.3	244.975							812.417	2.25722	35.5845	63.9989	170.088	223.996							811.686	-0.927277	49.9405	86.5017	117.632	182.011	231.289						810.955	-0.531311	59.1083	86.8693	116.357	146.243	174.536	215.447
813.148	1.73998	16.4629	88.2036	189.256	230.48							813.148	4.81841	31.5873	59.6947	171.856	214.151							812.417	1.32778	52.8456	89.0939	117.11	175.134	223.067						811.686	-0.662341	53.7821	85.3095	109.816	142.403	162.936	213.009
813.88	2.29758	13.7854	81.6315	184.347	219.081							813.88	-0.810909	33.6527	57.4394	160.019	205.025							813.148	1.60614	47.9164	76.5591	112.697	164.897	208.396						812.417	0.929445	47.6672	81.3928	104.231	130.919	160.13	199.3
814.611	2.58376	19.8542	83.6323	179.095	222.339							814.611	2.1758	25.0217	54.123	155.434	196.502							813.88	2.43273	45.1406	78.523	107.581	163.804	202.592						813.148	1.73998	53.1363	74.6853	101.856	131.302	155.26	189.925
815.342	1.76742	20.6652	74.9112	168.176	205.02							815.342	-0.679775	29.6382	53.5663	151.182	185.307							814.611	6.5274	48.0036	73.2972	104.846	155.434	194.734						813.88	2.16242	46.8976	67.9812	101.904	121.636	142.99	176.508
816.073	1.3585	15.3511	76.4837	164.243	193.587							816.073	6.65666	24.7247	50.9438	139.654	180.952							815.342	3.9427	43.0978	67.7056	98.8393	150.23	179.053						814.611	4.3516	46.6437	73.1612	96.5511	118.853	140.475	174.608
816.804	6.53496	14.7037	74.1991	147.581	187.88							816.804	4.08435	23.9615	49.0122	137.098	174.13							816.073	3.2604	45.1023	67.2458	92.2423	137.48	174.975						815.342	4.35056	40.7865	64.3067	92.1775	112.027	131.061	165.457
817.535	7.00628	13.1883	64.8425	148.918	183.125							817.535	-0.137378	24.7281	51.5168	132.707	165.128							816.804	2.17832	37.576	62.6267	88.9027	128.657	163.238						816.073	2.717	42.5211	66.159	87.08	113.163	130.688	158.13
818.265	2.08099	14.8444	58.1291	142.479	174.803							818.265	2.77466	25.1107	43.0072	121.807	151.774							817.535	2.06067	37.5042	62.6444	85.8613	133.944	162.244						816.804	2.31447	46.8339	60.04	91.8979	101.156	122.258	154.525
818.996	3.61777	15.7234	64.285	134.971	169.896							818.996	3.89606	25.0461	40.3521	122.309	149.164							818.265	-1.38733	36.7642	58.1291	79.6327	120.698	149.415						817.535	5.22037	43.6862	60.0342	84.6249	102.896	113.2	141.087
819.727	3.89495	15.5798	60.0936	133.68	157.885							819.727	0.834633	21.9787	39.0886	115.318	147.313							818.996	1.94803	26.855	60.6673	81.3999	115.351	144.989						818.265	5.82678	39.1227	55.6319	80.3263	95.4482	112.235	138.317
820.458	8.60357	18.8723	63.0003	123.919	158.611							820.458	6.10576	24.423	39.8262	109.626	144.734							819.727	1.25195	37.002	52.0254	76.9253	113.51	140.357						818.996	4.73093	30.0553	49.2574	76.1124	89.6094	104.22	134.136
821.188	5.84771	18.1001	63.3502	129.485	146.75							821.188	6.40464	22.8339	41.6302	109.297	137.282							820.458	2.22028	35.6632	52.454	76.4608	109.21	138.351						819.727	3.75585	35.8892	49.5215	69.5527	85.4107	99.1822	130.759
821.919	9.40387	19.2288	58.8093	122.671	142.742							821.919	9.26352	23.7202	37.6155	111.583	131.093							821.188	6.54387	34.3901	49.7056	73.2357	105.955	133.662						820.458	3.74672	34.6918	47.1809	67.4409	82.0114	96.9983	124.891
822.649	12.3427	17.4501	59.3018	126.406	143.715							822.649	9.93092	30.644	44.1217	106.687	127.825							821.919	8.9828	38.0366	51.23	72.0028	109.057	129.689						821.188	4.8731	31.4663	52.351	69.0587	83.8172	96.4873	120.574
823.38	18.9426	27.2033	59.8188	124.48	143.28							823.38	16.0941	30.0518	49.849	112.944	131.459							822.649	10.3565	34.9001	59.3018	75.9006	96.7556	131.514						821.919	2.66677	34.2469	52.0722	71.0203	78.7399	94.7405	119.724
824.11	19.03	30.5331	62.6284	115.6	138.322							824.11	21.4442	35.3616	44.5926	102.819	128.097							823.38	18.5154	44.5793	58.1097	76.9099	112.232	130.462						822.649	12.059	40.4331	52.492	65.8278	83.9872	91.932	116.476
824.841	14.0193	21.8079	59.3344	108.473	132.405							824.841	13.8777	34.4111	46.4479	98.7019	123.342							824.11	20.0241	43.7405	56.6638	75.8358	103.671	124.831						823.38	15.382	43.8671	60.3885	65.8007	86.31	95.995	113.656
825.571	12.8845	21.0966	53.945	100.244	120.35							825.571	12.3181	26.1938	34.1227	89.6251	110.014							824.841	13.8777	38.5178	55.3693	68.8222	96.5777	117.819						824.11	13.6334	43.4565	65.1847	70.4392	80.9483	92.4515	112.618
826.301	9.57614	15.4362	48.0236	96.7619	110.912							826.301	10.1478	28.2996	38.0187	89.7584	104.623							825.571	11.327	37.3792	51.1132	67.5374	87.9261	108.739						824.841	13.7361	40.7835	54.3781	60.8921	82.9832	85.8154	103.658
827.032	13.0017	15.3131	46.9505	91.1562	105.602							827.032	10.6903	21.9584	36.8381	82.6329	98.2349							826.301	10.7196	34.3026	48.0236	58.0285	84.4701	99.1916						825.571	18.1232	34.1227	47.8567	62.7234	75.0416	83.3952	98.1204
827.762	8.12492	18.8614	46.5732	89.6644	106.349							827.762	10.5914	19.5869	39.0287	78.7828	98.8049							827.032	10.8347	31.9263	44.0612	52.4401	82.9218	96.5013						826.301	13.2923	33.8738	41.0202	57.0281	65.3178	75.4657	93.6175
828.492	13.8865	14.7545	43.9741	92.2877	105.451							828.492	8.67909	25.0247	31.968	76.9546	96.6272							827.762	11.607	26.2609	37.4327	55.7138	74.1399	94.017						827.032	11.557	33.2265	40.7386	52.2956	56.6295	67.4642	93.7565
829.222	10.2278	15.9899	43.0719	79.6614	96.9477							829.222	14.6934	19.5912	28.6666	75.1957	84.5592							828.492	8.38979	29.7982	44.842	53.8104	83.6086	97.2058						827.762	13.3481	32.4997	42.6559	53.3924	64.419	72.6891	85.747
829.952	6.06582	15.0201	39.2834	76.5449	91.9983							829.952	7.51007	17.1865	29.0293	71.6345	82.1775							829.222	10.5159	26.9379	37.5979	57.1891	74.3314	89.7451						828.492	7.52188	28.9303	40.6471	52.0746	66.2504	71.1686	88.5267
830.682	9.87722	6.24589	32.8272	74.5149	83.6658							830.682	6.39114	15.9779	24.4025	64.0567	77.42							829.952	6.93237	22.9635	32.4955	44.3383	71.2012	83.6217						829.222	5.04186	25.7855	34.4287	47.3935	55.8926	75.0517	80.3816
831.412	5.43039	7.04483	30.3808	66.9258	80.5752							831.412	7.77866	16.2912	22.7489	63.1099	76.0254							830.682	4.50285	24.9836	32.101	44.4475	66.2355	76.2579						829.952	6.78794	27.0074	25.9964	47.9489	54.0147	58.203	73.0787
832.142	4.57395	6.63961	33.1981	69.347	78.9376							832.142	5.01659	15.4924	22.4271	55.3301	70.2323							831.412	7.04483	19.52	29.7937	45.7914	52.5427	74.411						830.682	1.01677	21.4975	29.4864	44.3022	50.8386	57.375	68.269
832.872	5.59097	6.62089	27.0721	63.7077	75.9195							832.872	7.06228	15.1545	23.8352	54.5855	69.74							832.142	5.75433	19.1811	28.0339	34.9686	54.0022	68.6093						831.412	1.46767	21.7215	27.4455	40.0674	44.0302	49.7541	68.2467
833.601	4.9762	9.9524	28.6863	61.9098	70.2522							833.601	6.58615	11.8551	22.9783	54.5918	70.6913							832.872	5.44384	13.9774	28.6905	35.8999	51.7901	67.5331						832.142	3.83622	19.4762	29.5094	36.4441	45.7395	51.789	63.2976
834.331	8.34638	12.7392	30.6034	58.5711	72.0424							834.331	5.2714	19.0356	21.232	48.3211	68.3817							833.601	1.02451	22.6856	30.0036	45.0785	55.47	62.6416						832.872	2.79549	15.743	25.1594	35.3114	47.229	48.7003	59.8823
835.061	13.3745	12.7866	28.8065	60.5525	65.1087							835.061	8.37741	14.1093	23.2216	44.5326	68.1951							834.331	10.6892	20.3534	29.432	42.1712	49.4925	61.2068						833.601	8.04973	17.2703	26.93	33.5162	40.9805	43.3222	62.0561
835.79	6.83081	8.76126	31.9266	54.9435	64.2987							835.79	7.57329	16.483	20.1954	47.9642	64.1502							835.061	10.1411	22.3398	24.2504	37.3309	58.7889	61.1404						834.331	3.95355	19.7677	30.0177	36.6069	41.8783	45.539	59.7425
836.52	3.58615	9.26421	27.3444	50.5049	66.792							836.52	3.58615	10.0113	15.0917	46.4705	55.2864							835.79	3.11842	19.0075	28.3627	43.3608	50.1916	58.2104						835.061	5.87889	21.017	28.8065	28.3656	42.328	46.4432	60.4056
837.249	2.69159	8.52337	25.1215	49.1963	56.6729							837.249	6.28038	8.82244	12.5608	48	55.7757							836.52	5.08037	19.7238	23.7582	30.034	44.9762	61.1139						835.79	7.2763	18.859	25.5413	32.3721	44.5488	44.5488	57.6164
837.979	7.14391	10.1205	20.6876	41.9705	48.9655							837.979	3.27429	9.52521	15.1808	46.5842	50.305							837.249	3.58879	17.0467	25.1215	32.5981	45.458	54.729						836.52	5.37922	16.7353	23.3099	21.0686	33.3213	43.9303	49.4589
838.708	1.63259	7.56928	24.0436	45.2673	50.1651							838.708	3.56202	9.49871	19.7395	38.5885	44.08							837.979	5.80443	12.353	21.4317	28.278	43.7564	49.8585						837.249	4.78505	18.8411	28.2617	25.271	35.5888	38.2804	50.9907
839.438	4.60408	7.72298	18.5648	41.7338	49.4568							839.438	1.93074	11.733	14.5548	34.3078	52.2786							838.708	5.49144	13.3576	16.3259	31.6129	41.26	46.3062						837.979	3.72078	17.1156	22.6224	30.3616	30.8081	40.7798	44.7983
840.167	10.6384	2.84691	17.8306	41.2052	50.4951							840.167	2.54723	16.0326	18.2801	40.6059	42.8534							839.438	4.01001	15.0004	21.6837	28.0701	34.1593	47.526						838.708	3.85885	10.8345	23.0047	31.7613	36.0654	36.6591	46.1578
840.896	4.5281	5.88652	20.2255	43.7716	55.0918							840.896	4.5281	9.20713	27.0176	34.7154	45.7338							840.167	2.09772	15.1336	21.5766	23.9739	32.5147	45.7003						839.438	3.26741	13.6637	22.7234	30.1493	27.6245	37.5753	35.199
841.626	3.03554	5.76752	22.6148	41.2833	47.9615							841.626	6.52641	13.6599	150.563	34.9087	39.0067							840.896	-1.35843	11.773	21.433	25.8101	32.1495	46.1866						840.167	4.94463	12.886	19.1792	24.873	29.6678	39.8567	35.6612
842.355	5.73615	6.49091	18.4161	36.9831	44.6816							842.355	9.81184	10.4156	26.2655	28.3788	35.7755							841.626	9.71373	10.1691	17.7579	24.1325	35.9711	42.8011						840.896	5.28278	16.1502	20.8292	29.4326	25.0555	30.3382	40.1491
843.084	2.40079	5.70187	20.2566	31.6604	46.9654							843.084	2.55084	10.5034	9.90324	26.4086	40.3632							842.355	1.81142	12.378	14.6423	26.4165	37.8888	41.2097						841.626	3.64265	37.7925	19.8828	28.2305	30.3554	27.1681	42.194
843.813	-0.746818	1.19491	11.9491	29.4246	44.9584							843.813	2.68854	7.16945	12.9946	27.3335	31.5157							843.084	2.10069	14.5548	17.7058	15.155	29.1095	39.763						842.355	3.32093	99.0241	15.0951	16.6046	26.4165	30.3412	38.1907
844.542	3.30145	5.7025	16.057	32.7144	38.1167							844.542	-0.450198	10.8047	10.6547	30.1632	32.5643							843.813	3.88345	12.8453	20.3134	18.5211	31.0676	36.146						843.084	5.40177	18.9062	9.00295	22.8075	25.0582	22.2073	38.2625
845.271	6.67176	5.9136	17.5892	28.9615	34.8751							845.271	2.57772	7.58154	13.0403	27.5968	34.1169							844.542	6.1527	13.0557	13.0557	20.8592	30.7635	39.0171						843.813	4.77963	13.4427	23.002	19.1185	20.6122	19.8654	35.9966
846	1.52858	4.43288	17.1201	29.6544	37.9087							846	5.65574	7.9486	12.6872	27.0558	30.7244							845.271	0.606523	8.94622	14.2533	21.0767	25.9289	31.8425						844.542	1.95086	12.1553	18.9083	22.0597	15.4568	28.3624	30.0132
846.729	2.4428	-0.152675	19.5424	28.8555	34.3518							846.729	2.74815	9.31316	7.78641	26.5654	31.451							846	-1.52858	8.86575	14.3686	16.3558	25.0687	39.2844						845.271	1.9712	13.3435	10.9174	15.3147	18.6506	21.8348	33.2072
847.457	3.48792	2.88133	11.9803	22.1407	37.3056							847.457	6.06595	3.79122	7.43079	20.3209	30.4814							846.729	-0.458024	5.95432	10.9926	14.5041	24.5806	33.1304						846	-1.68144	10.3943	13.2986	14.9801	21.4001	22.4701	29.043
848.186	4.06603	4.21662	10.9933	22.1373	31.0223							848.186	5.72255	3.46365	10.8427	23.1914	29.9681							847.457	0.454947	7.73409	11.9803	17.1363	23.6572	26.0836						846.729	0.458024	6.56501	11.4506	16.0308	17.0996	23.5119	27.3288
848.915	1.20647	9.19931	10.8582	20.5099	26.6931							848.915	0.754042	5.88153	7.088	24.8834	24.1293							848.186	-1.50594	7.0779	8.13205	17.4689	25.4503	29.2151						847.457	2.42638	8.34069	10.4638	15.4682	16.833	16.833	26.2353
849.644	3.79953	-2.73566	15.0461	22.4932	27.0526							849.644	4.25547	1.36783	11.3986	22.3412	24.165							848.915	2.41293	8.29446	10.7074	14.4776	26.0899	23.5261						848.186	2.4095	2.56009	15.3605	14.3064	12.4993	26.6551	28.914
850.372	3.51971	5.66214	8.72275	23.8728	28.0046							850.372	-0.306062	5.66214	8.26366	17.9046	27.8516							849.644	3.95151	5.47132	13.5263	17.1739	19.1496	26.7487						848.915	7.2388	9.19931	11.7631	14.4776	16.8905	19.3035	23.8277
851.101	1.84358	-1.68995	9.67878	21.2011	24.4274							851.101	4.14805	5.3771	7.06705	23.5056	23.5056							850.372	4.13183	6.12123	10.2531	17.7516	19.741	30.9122						849.644	7.59905	7.59905	14.4382	15.6541	22.9491	21.4293	22.4932
851.829	2.75513	4.59187	11.6327	21.8879	28.7757							851.829	10.1021	10.4083	6.58169	22.3471	22.041							851.101	1.68995	14.4414	8.14247	10.1397	22.8911	28.2682						850.372	5.66214	11.6303	12.7016	15.4561	12.2425	19.2819	24.3319
852.558	0.304445	1.52222	17.81	17.0489	24.8123							852.558	3.34889	6.85001	8.37223	20.7023	25.7256							851.829	5.20413	8.87763	9.64294	13.0103	17.2961	24.6431						851.101	7.37431	9.52515	9.83242	13.6732	15.0559	19.5112	24.8883
853.286	0.30358	0.15179	12.9022	22.465	23.9829							853.286	2.73223	6.52698	4.40192	15.4826	22.3132							852.558	0.152222	8.22001	9.28557	15.2222	17.81	21.0067						851.829	5.05106	9.94906	10.7144	12.245	7.65313	14.5409	22.9594
854.014	3.19706	-1.52241	5.9374	16.1375	23.7496							854.014	7.76429	8.22101	6.39412	17.66	16.5943							853.286	0.15179	3.33939	9.10741	14.7237	17.3041	20.4917						852.558	3.95778	8.37223	7.91557	15.9834	13.8522	15.2222	21.6156
854.743	0.153217	4.74974	7.35443	21.4504	24.3616							854.743	3.21757	8.42696	3.524	12.4106	18.999							854.014	-0.304482	-0.608964	10.2001	12.027	19.7913	23.5974						853.286	4.25013	4.25013	13.8129	15.0272	15.179	20.9471	15.179
855.471	-1.08115	6.02354	13.1282	14.9816	21.9319							855.471	6.17799	4.3246	8.34029	11.8926	22.0863							854.743	4.90296	5.66904	10.4188	12.8703	12.8703	19.6118						854.014	6.24188	1.97913	6.85084	16.442	14.6151	13.245	21.1615
856.199	7.42003	5.25585	5.10127	16.8496	27.3614							856.199	2.62793	4.32835	3.09168	24.888	17.6226							855.471	5.71464	6.64134	5.40574	10.1937	16.5261	20.8507						854.743	-0.61287	9.03983	5.82226	15.1685	14.7089	13.1767	21.2972
856.927	7.85865	1.23273	8.7832	13.2518	19.8778							856.927	4.62273	5.08501	8.01274	13.0977	25.8873							856.199	-1.85501	10.8209	7.26544	11.5938	14.0671	18.5501						855.471	5.25129	6.95024	10.1937	12.5104	11.8926	17.2984	17.1439
857.655	4.3009	2.30406	7.68018	7.68018	17.5108							857.655	5.37613	4.60811	2.76487	13.0563	24.1158							856.927	4.77683	5.2391	7.39637	12.6355	15.8714	20.1859						856.199	7.57461	6.64711	8.6567	10.3571	10.5117	14.9946	14.5309
858.383	2.90962	8.72887	11.0259	17.9172	12.251							858.383	2.29707	5.51297	4.90042	10.1071	17.764							857.655	-2.15045	5.83694	10.4451	11.6739	13.6707	21.5045						856.927	0.770456	9.86183	8.16683	10.4782	15.5632	17.2582	17.5664
859.111	5.84661	6.15433	6.15433	10.6162	23.0787							859.111	0.769291	2.46173	4.15417	11.3855	15.8474							858.383	1.37824	8.42259	5.20669	8.11632	15.1607	18.6828						857.655	1.84324	5.06892	7.52658	5.99054	14.2851	9.52343	17.9716
859.839	5.26823	1.39453	7.28256	14.5651	14.4102							859.839	-0.309896	8.67709	5.11328	11.4662	21.8477							859.111	5.84661	5.38504	4.30803	12.9241	12.0009	13.8472						858.383	0.306276	3.52217	4.13473	12.8636	10.5665	7.04435	16.5389
860.567	2.96885	1.25004	9.3753	15.4693	15.4693							860.567	6.87522	1.71881	7.96901	10.7816	16.4068							859.839	2.63412	8.21224	9.76172	10.0716	16.8893	15.1849						859.111	-2.15401	6.30818	2.46173	5.38504	9.84692	9.23149	20.9247
861.295	6.72673	6.72673	6.10099	12.8277	17.8337							861.295	2.65941	2.97228	4.69307	11.2634	15.0178							860.567	-0.468765	1.87506	5.31267	12.3441	13.9067	18.4381						859.839	3.40886	7.59245	7.12761	5.88802	5.42318	9.91667	15.9596
862.023	1.24781	0	7.48688	13.57	10.1385							862.023	-1.09184	1.24781	5.77114	14.9738	11.6983							861.295	2.97228	6.41386	6.57029	12.202	12.202	16.7386						860.567	-0.31251	6.09395	7.34399	13.7504	5.93769	12.6567	11.8754
862.75	6.66991	1.70626	4.49831	15.2012	10.858							862.75	2.01648	2.01648	9.46196	11.3233	11.1682							862.023	0.779884	-0.155977	6.23907	2.18367	14.3499	14.6618						861.295	1.09505	2.03366	8.60396	1.25148	7.97822	8.29109	11.8891
863.478	4.4902	4.18053	7.43205	13.3158	19.5091							863.478	4.33536	4.18053	5.10954	11.7674	13.0061							862.75	4.34319	6.82502	7.44548	11.6336	14.7358	13.0296						862.023	7.33091	-0.623907	1.09184	6.707	7.01895	12.6341	12.1662
864.206	8.87264	5.44811	7.16037	11.3632	16.3443							864.206	5.60377	7.31603	3.26887	14.0094	19.6132							863.478	0.154834	5.72887	4.18053	12.3868	15.4834	14.5544						862.75	1.0858	3.56762	5.42899	7.91082	9.46196	15.9768	10.0824
864.933	5.03008	1.72909	6.2876	11.1605	15.5618							864.933	4.7157	6.2876	4.55851	12.7324	13.9899							864.206	-0.311321	6.22641	4.98113	6.22641	8.40566	13.5424						863.478	2.16768	6.81271	6.34821	10.5287	8.36106	13.3158	5.57404
865.661	1.90279	4.12271	5.70836	14.9052	14.9052							865.661	-1.74422	5.0741	2.06135	9.03824	8.87967							864.933	4.08694	1.88628	8.95984	11.6321	13.204	12.8896						864.206	3.89151	3.89151	11.6745	10.4292	5.29245	12.9198	12.9198
866.388	0.794562	1.58912	8.58127	13.9843	13.8254							866.388	2.70151	2.70151	8.10453	7.78671	14.9378							865.661	-0.317131	5.70836	3.48844	8.87967	7.92828	13.7952						864.933	2.67223	5.97322	8.33108	9.27422	10.6889	6.2876	8.17389
867.116	5.54669	5.54669	7.60689	10.7764	9.35013							867.116	5.38821	8.2408	3.16954	8.08232	14.2629							866.388	1.43021	2.22477	9.21692	7.78671	13.6665	13.1897						865.661	2.85418	6.65975	5.86693	9.6725	4.91553	13.9538	11.2582
867.843	5.68139	5.99703	2.05161	8.04864	8.20646							867.843	7.73301	3.47196	7.57519	4.57668	13.4144							867.116	-1.42629	5.54669	6.49755	4.75431	13.1536	9.98404						866.388	1.58912	2.22477	0.158912	5.72085	10.4882	13.1897	13.1897
868.57	3.95046	8.53299	10.4292	12.7995	12.1674							868.57	7.42686	6.16271	8.37497	12.7995	9.63911							867.843	1.8938	4.41886	8.36427	13.0988	11.0472	11.5206						867.116	2.53563	5.22974	2.53563	11.7273	3.96192	8.08232	6.97298
869.298	4.61869	7.804	1.59265	5.41502	19.9082							869.298	6.37061	3.34457	-0.31853	10.193	10.6708							868.57	5.68866	5.68866	8.05893	8.05893	10.9033	8.53299						867.843	3.47196	7.41738	5.83921	9.62681	5.52358	10.5737	11.8362
870.025	-0.805266	-0.644213	9.50214	9.50214	12.7232							870.025	0.805266	3.86528	3.06001	10.3074	7.40845							869.298	0	5.73355	9.55592	6.05208	9.39665	10.6708						868.57	0.158018	4.26649	6.47875	8.21695	11.5353	10.7452	4.74055
870.752	3.08876	0.487698	5.68981	12.8427	12.355							870.752	1.4631	6.34008	5.85238	8.1283	9.1037							870.025	1.93264	2.89896	7.89161	8.85793	6.60318	9.82424						869.298	2.86678	-0.637061	6.84841	11.4671	9.55592	7.3262	9.23738
871.479	5.54135	1.14087	12.8755	10.9197	11.8976							871.479	0.814904	3.25962	0.651923	6.19327	7.6601							870.752	1.30053	3.57645	2.11336	11.0545	8.1283	7.15291						870.025	0.48316	4.18738	6.28108	1.93264	10.7906	6.28108	6.92529
872.206	2.93265	2.93265	1.9551	3.9102	11.5677							872.206	2.11802	2.11802	7.98332	8.63502	11.0789							871.479	1.95577	1.14087	5.70433	4.72645	4.07452	13.3644						870.752	0.487698	3.73902	3.57645	5.68981	3.41389	5.52725	13.8181
872.933	5.69746	5.3719	3.41848	7.32531	14.9762							872.933	0	0.651139	8.95316	12.6972	9.11594							872.206	0	5.21359	5.86529	8.14624	6.51699	8.96087						871.479	-1.46683	3.58558	2.44471	5.37837	3.4226	7.17116	11.4087
873.66	0.489997	5.38996	5.38996	9.79993	13.7199							873.66	5.71663	5.71663	5.22663	13.3932	3.26664							872.933	0.162785	1.30228	5.86025	10.9066	7.97645	14.4878						872.206	3.2585	-0.162925	8.30917	4.5619	1.3034	6.51699	10.4272
874.387	3.2919	4.27947	6.41921	8.06516	9.21732							874.387	0.822975	8.06516	4.44407	7.57137	11.8508							873.66	2.61332	7.83995	8.32994	7.83995	6.85995	14.6999						872.933	4.2324	4.55797	4.39519	4.88354	7.16253	6.51139	10.9066
875.114	7.16072	5.16238	2.83098	4.82932	7.99336							875.114	7.49377	4.32974	5.99502	9.65864	10.3248							874.387	2.63352	5.26704	3.4565	14.9781	10.8633	5.10245						873.66	4.89997	4.40997	6.20662	7.67661	7.51328	6.04329	12.0866
875.841	3.53479	2.69317	7.40622	10.0994	8.07951							875.841	6.56461	6.39628	3.87143	11.6143	9.59442							875.114	-3.49709	6.82766	3.16404	9.15906	7.32724	12.1566						874.387	4.60866	3.95028	7.40678	5.59623	1.64595	8.39435	14.1552
876.567	10.1171	6.07028	0.337238	15.8502	17.1991							876.567	1.18033	2.36067	3.541	7.082	8.26233							875.841	6.39628	9.08945	3.36646	10.436	8.07951	12.6242						875.114	2.49792	4.32974	10.8243	11.3239	5.99502	12.8227	10.6578
877.294	0.674083	6.57231	5.89823	9.26864	11.965							877.294	5.22415	10.9539	3.70746	10.2798	9.43717							876.567	4.88995	7.25061	8.43095	4.55271	11.1289	10.1171						875.841	6.56461	8.41616	4.71305	14.4758	3.87143	13.8025	8.41616
878.021	6.04303	2.01435	8.3931	10.0717	12.9254							878.021	13.2611	3.02152	5.03586	11.2468	11.7503							877.294	6.90935	11.965	9.77421	8.089	8.76308	8.9316						876.567	-0.168619	0.843095	5.56442	9.10542	5.73304	14.3326	4.38409
878.747	3.69135	5.8726	6.37597	13.5909	17.9534							878.747	11.5774	3.69135	8.8928	9.73174	11.5774							878.021	4.53228	2.68579	3.69297	7.55379	8.3931	10.911						877.294	5.39267	5.22415	6.74083	10.7853	7.75196	12.9761	11.1224
879.474	3.03235	11.7925	3.20081	13.6456	16.8464							879.474	15.3302	7.74934	8.42319	12.2979	12.8032							878.747	4.86587	5.53702	6.04039	12.0808	4.86587	8.8928						878.021	6.04303	12.2539	10.2396	8.05738	8.3931	6.71448	5.03586
880.2	13.2783	10.0438	2.04281	10.7247	17.1936							880.2	14.6401	8.5117	9.87357	10.0438	19.2364							879.474	3.7062	6.57009	10.6132	16.5095	14.151	11.4555						878.747	3.69135	10.9063	6.87933	17.2822	10.5707	10.4029	7.88606
880.927	15.7758	9.60269	15.2614	15.6044	20.7487							880.927	12.6893	13.3752	15.7758	16.2903	22.292							880.2	5.44749	10.3843	8.68193	12.5973	15.8318	14.2997						879.474	7.41241	13.6456	7.9178	9.09704	12.2979	10.1078	9.93936
881.653	25.2703	20.8007	31.287	21.6602	26.3017							881.653	27.8489	20.1131	22.5198	22.5198	21.6602							880.927	14.0611	15.0899	13.7181	11.6604	19.2054	20.7487						880.2	8.85217	10.7247	8.5117	13.108	11.7461	10.895	16.6829
882.379	30.151	22.7846	26.8961	28.9519	36.147							882.379	29.4658	23.1272	28.6092	26.3822	31.8642							881.653	19.9412	22.3479	24.7546	25.0984	22.0041	20.4569						880.927	14.404	16.1188	6.00168	13.7181	17.8336	17.1477	19.8913
883.105	25.093	26.4586	27.4828	30.214	32.6038							883.105	26.6293	25.7758	30.3847	28.8484	28.1656							882.379	23.9838	25.6969	22.0993	26.8961	27.5814	27.5814						881.653	15.6435	18.2221	17.5345	22.6917	21.4883	19.2536	17.7064
883.832	27.0603	23.9969	23.1459	25.6988	26.0391							883.832	27.0603	20.7632	22.8055	28.0814	26.8901							883.105	24.9223	23.8981	21.8497	26.8	30.7261	29.7019						882.379	24.3264	21.7567	26.8961	24.3264	16.7886	25.8682	26.7248
884.558	17.295	14.384	21.4047	25.5144	20.891							884.558	20.2061	17.1238	17.8087	19.3499	18.3224							883.832	26.0391	22.8055	19.5719	19.4017	31.315	29.7833						883.105	23.5567	23.2153	24.2395	25.9465	26.9707	18.7771	29.1898
885.284	18.1468	20.2208	19.1838	20.5664	14.1718							885.284	14.3446	17.2827	19.5295	13.999	11.9251							884.558	16.7813	16.6101	21.9184	22.4322	20.0348	21.2335						883.832	20.593	13.1047	28.0814	14.6364	14.296	20.593	23.3161
886.01	7.48956	14.9791	16.8951	15.1533	15.6758							886.01	14.6308	9.92802	10.1022	9.57967	14.1082							885.284	11.5794	12.6164	14.5175	15.036	19.011	17.4555						884.558	17.98	15.7539	19.8636	16.2676	16.4388	17.8087	21.0623
886.736	8.58521	5.08104	7.70917	12.2646	12.0894							886.736	5.95709	13.3158	2.27771	12.0894	14.8927							886.01	10.6247	9.92802	10.6247	13.7599	10.1022	16.5467						885.284	15.036	16.7642	13.8262	10.5425	16.5914	21.0849	18.4925
887.462	12.7849	17.5135	6.65514	11.0335	11.9092							887.462	7.88108	7.53081	6.30487	15.9373	11.2087							886.736	9.63646	11.0381	8.76042	8.05959	9.98688	13.4911						886.01	10.7989	2.26429	16.1984	17.0692	12.5407	13.9341	10.9731
888.188	10.3143	3.6712	12.2373	10.8388	14.3352							888.188	6.81795	9.78987	5.59421	10.3143	3.6712							887.462	6.30487	8.9319	11.0335	11.5589	10.5081	8.05622						886.736	9.46126	6.3075	16.2944	13.6663	8.41001	10.6877	10.6877
888.914	10.6719	10.8468	10.147	4.37372	12.0715							888.914	13.4711	7.8727	6.82301	12.2464	6.82301							888.188	6.99277	6.29349	12.2373	6.81795	11.1884	10.1395						887.462	9.63244	3.5027	9.98271	12.0843	8.23135	12.2595	6.30487
889.639	9.31603	10.1949	11.4253	5.80055	12.1284							889.639	6.85519	4.57013	13.3588	6.50364	3.33971							888.914	9.97208	4.37372	5.07352	10.147	11.5466	7.69775						888.188	11.7129	8.39132	8.04168	11.0136	12.4122	7.51722	11.3632
890.365	4.08318	10.1192	5.14836	9.5866	13.3147							890.365	5.14836	9.23154	6.5686	9.94166	11.717							889.639	7.03097	7.38251	5.09745	3.16393	5.80055	5.27323						888.914	9.44724	10.8468	8.74744	8.2226	10.8468	11.1967	12.5963
891.091	11.4838	9.50998	5.92131	6.28018	11.4838							891.091	10.5866	7.53621	4.30641	3.05037	9.33055							890.365	8.87648	4.08318	4.61577	12.2495	8.34389	4.08318						889.639	8.08561	5.97632	12.3042	12.3042	13.3588	8.43716	16.347
891.816	8.12268	2.52705	4.5126	7.22016	10.8302							891.816	9.3862	8.48368	2.70756	7.40066	7.58116							891.091	5.20357	2.1532	9.50998	11.8426	10.2277	6.10074						890.365	5.14836	3.19553	4.43824	12.9597	6.21354	2.30789	3.72812
892.542	7.06159	5.79413	15.5717	8.32906	6.15626							892.542	7.96693	6.15626	7.96693	5.61306	9.23439							891.816	7.40066	0.541512	6.13713	14.8013	10.1082	9.2057						891.091	5.74188	8.43338	11.8426	9.86885	10.9454	4.48584	4.12697
893.267	5.43365	10.8673	5.97702	6.33926	10.3239							893.267	4.70917	6.33926	7.06375	14.852	4.34692							892.542	6.5184	9.41546	6.15626	6.69946	1.81067	10.5019						891.816	6.31764	7.76167	7.40066	15.3428	9.2057	8.66419	10.1082
893.993	7.42293	7.42293	5.61246	7.42293	16.2942							893.993	9.41445	6.69874	10.3197	13.5785	6.5177							893.267	5.7959	4.89029	6.88263	5.7959	12.8596	3.80356						892.542	7.96693	7.24266	6.15626	11.2261	8.14799	6.69946	6.15626
894.718	12.3465	9.44141	15.2515	7.26262	16.704							894.718	18.7012	14.1621	14.3437	14.1621	8.53358							893.993	9.5955	8.69026	12.1302	8.69026	10.5007	8.87131						893.267	1.08673	3.80356	7.60712	10.1428	15.5765	2.17346	12.6785
895.444	14.4351	14.6178	13.1561	19.0032	22.8404							895.444	14.8006	10.5979	14.0697	12.9733	12.9733							894.718	6.71792	6.71792	11.4386	19.6091	13.2543	14.3437						893.993	7.24188	16.1132	6.69874	6.1556	13.7596	10.8628	16.8374
896.169	17.7203	7.56806	14.3978	17.3512	16.7974							896.169	16.2436	15.8745	13.6594	15.1361	16.059							895.444	12.9733	14.2524	14.8006	17.9069	12.7906	18.2723						894.718	13.0727	7.08105	9.62297	9.44141	12.3465	13.2543	17.2487
896.894	12.6818	15.8522	10.8168	15.2927	18.4632							896.894	8.76534	12.3088	7.83286	15.6657	15.4792							896.169	8.67558	16.4282	15.1361	17.3512	11.2598	18.4587						895.444	9.5016	13.1561	9.68432	19.1859	12.6079	16.9932	11.877
897.619	10.5064	8.63027	7.50458	9.56834	16.5101							897.619	9.38073	5.25321	6.56651	14.2587	7.12935							896.894	7.45986	20.7011	13.0548	16.4117	17.7172	11.7493						896.169	8.12181	13.6594	12.3673	10.1523	10.5214	14.5823	16.6128
898.345	6.59002	6.59002	5.08373	11.1089	11.6738							898.345	12.6152	11.4855	3.76573	10.3558	12.2386							897.619	7.12935	12.9454	14.0711	17.2605	13.8835	11.8197						896.894	6.52738	13.0548	13.4278	7.83286	16.0387	8.76534	18.2767
899.07	10.7375	6.96994	9.98397	4.52104	11.6794							899.07	8.47696	0.941884	5.83968	4.52104	10.7375							898.345	8.09632	9.41432	3.76573	13.7449	9.79089	6.02517						897.619	11.6321	12.1949	7.31697	7.6922	12.5702	7.50458	8.25504
899.795	9.40663	-1.50506	7.5253	8.0897	2.06946							899.795	4.32705	1.12879	4.89145	11.0998	6.9609							899.07	1.69539	11.6794	10.1723	10.5491	10.1723	11.1142						898.345	12.8035	3.95401	12.6152	2.25944	10.7323	16.7575	6.40174
900.52	1.51232	4.72598	5.86022	2.45751	8.69581							900.52	3.78079	9.07389	8.88485	1.51232	8.50677							899.795	5.64398	3.95078	4.89145	13.1693	13.5455	8.84223						899.07	8.28858	3.95591	9.98397	9.98397	4.70942	6.40481	8.47696
901.245	6.09093	8.56536	2.2841	1.52273	5.13922							901.245	7.04263	10.8495	8.94605	6.09093	3.80683							900.52	8.88485	10.9643	4.15887	6.42734	3.40271	7.93965						899.795	7.71343	10.3473	10.9117	12.793	9.21849	11.8523	8.84223
901.97	8.09712	6.7476	8.09712	6.94039	5.97645							901.97	8.09712	3.4702	7.13318	2.12067	5.59087							901.245	7.04263	1.71307	11.2301	12.3722	7.42331	9.32673						900.52	8.88485	5.86022	9.07389	10.2081	7.37254	6.61638	6.61638
902.694	9.52534	5.63745	12.2469	8.74777	13.802							902.694	3.8879	7.5814	6.02624	0.583184	9.13656							901.97	7.71155	5.97645	7.71155	4.24135	4.62693	12.7241						901.245	4.94888	10.4688	3.61649	7.42331	5.32956	6.85229	10.6591
903.419	3.1244	4.6866	5.4677	9.76375	9.95903							903.419	10.5449	13.8645	7.0299	5.66298	6.44407							902.694	3.11032	8.16458	8.74777	3.49911	6.22063	15.746						901.97	4.62693	-2.89183	1.34952	12.1457	6.7476	6.7476	9.83222
904.144	15.2337	12.4994	9.96048	16.0149	14.8431							904.144	15.0384	4.88259	13.2806	7.42153	18.3585							903.419	5.66298	14.2551	8.5921	7.811	3.51495	11.5212						902.694	2.52713	2.91592	5.44305	14.3852	4.27669	1.55516	8.74777
904.868	14.4369	14.4369	13.8517	16.9732	13.6566							904.868	15.6075	18.1437	13.8517	20.2898	17.9486							904.144	11.9135	11.9135	7.22623	10.7417	16.0149	13.6712						903.419	4.6866	9.76375	8.78738	16.7936	8.5921	4.49132	7.61573
905.593	16.8512	18.0268	17.2431	12.7364	12.7364							905.593	22.9254	14.8917	15.6755	15.0877	15.2836							904.868	12.6811	13.8517	10.9253	12.8762	17.9486	11.9007						904.144	15.8196	12.89	9.17926	10.3511	14.6478	7.61684	11.9135
906.318	8.8572	13.7779	8.66037	11.2191	17.1239							906.318	8.06989	13.9747	9.44767	13.581	14.762							905.593	14.3039	9.20936	15.8715	10.581	19.3984	13.7161						904.868	13.6566	15.6075	12.0958	14.0468	11.3154	14.632	15.9977
907.042	7.97226	6.1785	14.7487	6.1785	16.941							907.042	7.77295	3.78682	11.1612	5.77989	13.3535							906.318	13.3842	8.06989	10.0382	11.4159	10.235	13.3842						905.593	14.8917	17.2431	12.9323	18.0268	12.9323	18.2228	13.912
907.767	8.0496	4.42728	8.45208	8.65332	9.0558							907.767	10.4645	6.0372	5.43348	11.0682	6.0372							907.042	8.17156	10.1646	10.5632	13.1542	10.7625	11.5598						906.318	15.5493	9.84133	12.5969	9.25085	9.6445	8.06989	8.06989
908.491	0.607631	-2.02544	11.3424	6.07631	2.83561							908.491	13.1653	4.6585	4.86105	5.46868	1.82289							907.767	7.84836	6.64092	7.64712	11.6719	11.2694	10.2632						907.042	9.16809	8.17156	7.97226	7.77295	5.77989	8.37087	13.7521
909.215	-3.44696	5.88011	3.04144	8.1105	5.67735							909.215	6.69116	1.6221	-3.2442	7.50221	7.50221							908.491	9.11446	9.11446	1.62035	9.51955	7.29157	6.07631						907.767	3.82356	5.63472	6.23844	3.82356	1.0062	3.0186	6.84216
909.94	3.45288	3.04666	4.26533	4.87466	4.87466							909.94	2.43733	7.31199	3.8591	7.31199	7.10888							909.215	6.69116	2.63591	-4.8663	8.51603	0.405525	9.12431						908.491	6.27885	-1.21526	10.7348	3.64579	2.43052	4.05087	11.3424
910.664	-1.62762	4.67941	1.83107	7.93465	8.95191							910.664	2.84834	8.545	2.84834	7.93465	1.83107							909.94	3.24977	6.70266	-1.21866	3.24977	-0.406222	2.84355						909.215	-1.21657	6.89393	2.02763	6.08288	3.2442	5.88011	8.92155
911.388	4.69733	1.63385	9.39466	6.53542	2.04232							911.388	11.6412	5.51426	5.51426	0.612695	2.65501							910.664	0	-3.8656	11.1899	6.51048	7.32429	5.49322						909.94	1.01555	1.62489	1.828	4.26533	6.29643	-1.42178	1.828
912.112	3.91242	7.61893	3.08876	6.38343	13.1787							912.112	4.94201	5.76568	5.14793	5.55976	5.35384							911.388	4.69733	5.92272	-3.06348	2.65501	-1.02116	15.3174						910.664	5.69667	3.05179	3.8656	0.81381	-3.25524	2.64488	6.10358
912.836	6.8578	3.94843	7.06561	8.72811	1.24687							912.836	6.44217	-1.24687	-4.77968	7.68905	6.02655							912.112	7.82485	8.85444	6.17751	0.205917	5.35384	8.03077						911.388	8.16927	2.45078	1.63385	2.45078	4.08464	5.31003	6.53542
913.56	9.44851	1.67973	8.39867	1.46977	3.35947							913.56	3.98937	9.23854	2.93954	5.0392	-0.419934							912.836	2.49375	0.415624	9.76717	2.49375	2.90937	1.24687						912.112	7.00118	12.5609	8.64852	2.05917	2.67692	1.02959	3.50059
914.284	13.488	3.16125	8.64074	7.79774	10.7482							914.284	12.8557	9.69448	5.05799	8.42999	9.69448							913.56	-0.839867	6.92891	6.50897	7.13887	7.34884	7.34884						912.836	5.61092	11.4297	2.07812	4.57186	6.23436	14.9625	8.31248
915.008	9.94316	10.1547	5.50047	5.28892	12.4818							915.008	7.19293	6.55826	15.4436	8.25071	11.8472							914.284	1.89675	1.05375	7.16549	12.2235	1.47525	9.06223						913.56	2.93954	7.13887	7.34884	11.5482	4.19934	11.3382	4.82924
915.732	16.7482	11.6602	18.4443	17.3843	16.9602							915.732	12.5082	12.0842	18.4443	8.90413	15.6882							915.008	10.1547	7.40448	4.44269	9.73161	8.88538	11.6356						914.284	12.2235	16.4385	11.5912	8.00849	5.47949	10.3267	9.69448
916.456	16.1173	19.0862	12.3	18.6621	19.5104							916.456	10.3914	17.1776	12.7241	19.9345	17.3897							915.732	4.66407	10.8122	15.6882	16.5362	13.1442	20.1403						915.008	9.94316	9.52005	9.73161	6.3467	10.3663	9.94316	13.3281
917.18	17.465	19.5949	16.4001	16.4001	19.3819							917.18	17.891	14.4832	11.7144	19.1689	10.6494							916.456	12.5121	14.6328	21.419	15.481	14.2086	12.7241						915.732	10.1761	11.4482	10.6002	17.5963	18.8683	14.8402	20.1403
917.903	13.3396	15.4912	23.2368	12.2638	17.6427							917.903	17.2124	17.8579	5.59403	12.6942	12.0487							917.18	16.1871	17.891	17.465	25.1326	17.678	14.2702						916.456	16.1173	14.2086	16.9655	19.2983	17.8138	14.6328	23.1155
918.627	9.598	10.4705	17.669	17.4509	17.8872							918.627	10.6887	9.81614	12.87	8.94359	16.1421							917.903	14.2002	10.9729	11.4032	19.5791	18.2882	18.2882						917.18	18.104	8.51953	15.3352	15.3352	17.2521	13.6313	18.317
919.35	21.1437	17.6198	11.8933	9.47062	8.58963							919.35	9.03013	8.36939	10.5719	3.96445	11.6731							918.627	8.50732	14.397	14.1789	11.7794	18.1053	12.87						917.903	10.1123	5.16373	19.1488	12.6942	11.8335	10.5426	8.39105
920.074	5.97737	3.09938	13.5044	3.54215	15.0541							920.074	6.86291	0.664152	7.08429	10.6264	3.32076							919.35	0.220247	12.9946	4.18469	12.7743	11.2326	12.5541						918.627	10.4705	15.4877	11.5612	6.10782	9.81614	12.2156	15.7058
920.797	4.44729	-3.7802	10.8959	2.00128	4.89202							920.797	12.23	12.23	11.7853	3.7802	7.33803							920.074	4.42768	7.74844	10.1837	7.30567	10.1837	5.5346						919.35	2.20247	5.28593	15.6375	10.3516	5.28593	4.62519	8.80988
921.521	8.24747	1.78324	3.78938	0.891618	8.91618							921.521	5.79552	8.91618	-1.78324	10.0307	1.56033							920.797	-0.667093	10.0064	3.7802	10.8959	9.78404	-2.66837						920.074	6.42014	6.19875	9.96228	1.10692	6.19875	6.86291	9.7409
922.244	7.60532	8.05269	2.90792	6.71058	5.81583							922.244	6.71058	9.17112	4.92109	9.39481	8.27638							921.521	5.34971	2.89776	6.24133	3.34357	6.24133	6.91004						920.797	3.33547	4.00256	11.1182	9.78404	9.56167	5.33675	6.22621
922.968	7.44929	2.93457	5.86914	5.86914	3.61178							922.968	4.51472	11.5125	5.19193	6.77208	5.6434							922.244	5.14478	2.01317	6.48689	8.72375	3.35529	6.26321						921.521	7.80166	-4.45809	6.24133	8.69328	14.2659	4.681	6.91004
923.691	-2.96774	2.73945	15.9801	7.07692	2.28288							923.691	1.59801	9.35979	5.4789	9.81637	4.79404							922.968	-4.51472	9.93239	2.93457	12.867	-6.99782	4.28899						922.244	6.26321	5.59215	9.84218	7.82901	6.71058	7.82901	-0.447372
924.414	-1.15735	9.25881	4.86088	5.78676	5.09235							924.414	0.925881	3.00911	8.33293	9.95322	10.4162							923.691	3.19603	5.25061	1.59801	7.53349	15.067	2.96774						922.968	2.4831	5.86914	13.0927	12.1897	1.80589	2.93457	3.61178
925.137	-0.468585	3.98297	4.45156	3.98297	3.74868							925.137	5.38873	4.68585	1.64005	0.702878	4.21727							924.414	3.47205	0.462941	6.48117	6.01823	10.8791	-0.925881						923.691	8.21835	6.39205	0.91315	8.21835	-2.73945	5.4789	10.2729
925.86	12.0075	10.8303	0	12.4784	5.65061							925.86	9.18224	8.71136	4.4734	6.12149	2.58986							925.137	2.57722	3.51439	8.20024	4.92014	4.68585	12.4175						924.414	3.47205	2.77764	8.33293	3.24058	9.49028	2.3147	0.925881
926.583	1.18313	1.65639	9.46507	9.93832	7.0988							926.583	0.473253	1.18313	4.49591	6.15229	12.7778							925.86	5.17973	5.65061	-2.82531	1.41265	9.18224	6.59238						925.137	2.34293	7.26307	0	1.17146	6.79448	2.57722	4.68585
927.306	0	7.85711	9.04758	2.14285	-0.952377							927.306	1.42857	8.0952	3.33332	11.6666	3.57141							926.583	4.02265	4.02265	4.73253	0.946507	9.22844	5.20579						925.86	0.941768	1.17721	4.23796	7.76959	3.29619	5.41517	8.71136
928.029	4.79809	0.239905	-0.47981	9.59619	4.31829							928.029	4.31829	4.79809	6.95724	3.83848	3.83848							927.306	3.33332	0.714282	7.38092	5.47616	4.52379	3.09522						926.583	-3.5494	4.96916	-0.946507	13.0145	7.0988	6.62555	8.04531
928.752	-6.55309	-2.18436	8.73745	4.85414	12.6208							928.752	2.18436	3.3979	-0.242707	5.82496	6.31038							928.029	-3.59857	2.87886	6.23752	6.47743	5.51781	3.59857						927.306	6.66664	3.80951	4.76188	9.52377	4.76188	5.71426	3.57141
929.475	7.14967	3.20502	7.64275	-1.97232	6.16351							929.475	5.17734	1.47924	5.17734	1.47924	2.71194							928.752	-3.15519	-1.69895	4.85414	1.21353	-0.728121	4.61143						928.029	0.959619	0.239905	-2.87886	0.719714	8.39667	4.31829	5.75771
930.198	1.25568	4.52045	12.5568	0.502272	2.26023							930.198	2.7625	2.00909	11.05	2.00909	5.27386							929.475	4.93081	5.42389	2.21886	4.43773	-1.72578	4.68426						928.752	-0.242707	-0.728121	2.66978	15.0478	-0.242707	-2.91248	9.95098
930.92	-2.80694	7.91045	1.78623	4.84834	5.35869							930.92	3.06211	2.80694	-9.18633	3.82764	6.3794							930.198	8.28749	5.77613	3.26477	3.51591	1.75795	3.76704						929.475	0.739621	4.68426	0.49308	4.19118	1.97232	-0.24654	2.71194
931.643	4.40052	2.32969	1.29427	3.88281	8.54219							931.643	10.3542	7.76563	5.43594	8.02448	8.80104							930.92	2.55176	3.06211	-6.63457	-0.510352	6.12422	1.53106						930.198	0.502272	0.753409	1.25568	6.02727	6.78068	-3.51591	9.54318
932.366	1.04774	-1.57161	5.76258	10.7394	7.59613							932.366	2.88129	10.2155	9.95355	-1.57161	3.92903							931.643	0.517708	0.517708	3.3651	3.62396	1.55313	3.3651						930.92	0	6.12422	4.59317	-0.510352	-3.57246	-1.78623	9.18633
933.088	1.33076	0.532303	2.66151	-0.798454	5.58918							933.088	8.51684	7.98454	1.86306	7.18609	6.65379							932.366	-6.02452	0	4.71484	11.0013	10.7394	1.83355						931.643	4.65938	5.17708	9.31875	0.776563	1.55313	-2.8474	4.91823
933.811	6.28776	4.37409	7.38128	8.47481	3.82733							933.811	4.92086	-0.273381	9.56833	9.56833	3.82733							933.088	2.39536	9.3153	-0.266151	3.72612	12.5091	-3.19382						932.366	-1.57161	8.12001	4.71484	-1.30968	7.3342	0	2.09549
934.533	5.39236	-2.83808	0.283809	-0.567617	3.97332							934.533	9.08187	1.13523	5.10855	3.97332	2.83808							933.811	-2.46043	1.64028	4.92086	4.37409	2.46043	13.1223						933.088	-0.532303	2.92767	2.39536	1.86306	6.91994	4.52457	-0.798454
935.256	9.17571	3.55189	0.887971	16.5755	9.17571							935.256	3.55189	1.18396	5.62382	7.69575	9.76769							934.533	-5.67617	1.41904	2.55428	3.4057	9.9333	3.68951						933.811	5.46762	-2.18705	3.28057	3.82733	-4.37409	3.28057	13.1223
935.978	-0.927065	-8.03457	-4.3263	9.27065	10.8158							935.978	6.48946	2.47217	4.63533	-4.3263	16.0691							935.256	1.18396	0.591981	-0.591981	10.3597	9.4717	5.91981						934.533	6.24379	3.68951	3.4057	5.95998	6.8114	4.54094	-0.567617
936.7	2.90752	5.81505	-0.969175	13.2454	9.36869							936.7	0.323058	3.8767	13.5684	5.16893	0.323058							935.978	15.7601	-2.16315	9.8887	0.309022	-4.01728	6.18044						935.256	4.43986	-4.73585	3.84788	0	7.99174	-0.591981	-1.77594
937.422	4.75359	10.8653	9.84671	10.1863	12.9026							937.422	8.149	8.82809	9.50717	4.0745	5.43267							936.7	18.4143	-5.16893	2.58447	9.36869	5.49199	6.78422						935.978	6.48946	4.01728	11.1248	9.8887	-1.85413	10.1977	-0.618044
938.145	1.06696	4.6235	3.55654	-3.20089	0.711308							938.145	11.0253	-2.48958	2.13392	9.60266	8.89135							937.422	-1.69771	11.5444	3.73496	10.5258	13.2421	-4.75359						936.7	10.3379	7.43034	12.9223	8.07646	2.90752	12.9223	-7.43034
938.867	-1.86098	5.95512	3.72195	5.58292	20.0985							938.867	13.7712	5.58292	5.58292	2.23317	-1.11658							938.145	7.11308	2.48958	8.89135	3.91219	3.20089	16.3601						937.422	11.884	7.46992	7.46992	12.563	5.09313	4.0745	0
939.589	-4.29534	-6.63825	-3.90485	1.56194	10.1526							939.589	19.9148	7.41922	7.02874	14.8384	1.17146							938.867	-2.23317	10.4215	2.97756	-0.74439	15.6322	8.18829						938.145	3.55654	3.91219	0.355654	16.0044	2.84523	-6.75742	4.97916
940.311	11.8783	0.409596	2.04798	9.01111	5.73434							940.311	8.60152	8.60152	12.6975	13.1071	9.42071							939.589	4.29534	-5.85728	9.76213	12.4955	3.12388	1.17146						938.867	13.0268	-4.83853	-2.23317	28.659	21.5873	9.30487	4.09414
941.033	16.1771	2.97999	19.1571	-12.3457	16.6028							941.033	8.08854	5.53426	14.0485	5.10855	9.79139							940.311	7.78232	11.4687	9.42071	12.2879	8.19192	2.45758						939.589	12.4955	13.667	1.95243	12.886	10.1526	0	9.76213
941.755	11.4149	-6.14646	16.6833	8.78066	-3.9513							941.755	7.02453	-0.439033	-7.90259	-0.439033	13.171							941.033	17.0285	5.53426	0.425713	11.0685	10.6428	9.36568						940.311	1.63838	14.3359	-2.04798	28.6717	1.22879	10.2399	13.5167
942.476	12.0626	9.82883	11.6159	-5.80794	0							942.476	13.4029	10.7224	-4.46765	1.34029	2.68059							941.755	7.90259	11.8539	6.58549	8.34163	15.3662	14.9271						941.033	17.8799	12.3457	-0.425713	5.53426	5.53426	13.6228	10.2171
943.198	12.6584	15.8231	15.8231	6.78131	-1.80835							943.198	4.52087	4.52087	-5.87714	4.52087	-1.80835							942.476	-0.89353	11.1691	14.2965	7.595	5.36118	0						941.755	-1.3171	3.9513	-7.46356	-4.39033	9.65873	16.2442	5.70743
943.92	12.7265	-1.36356	-9.09039	6.81779	-1.36356							943.92	-9.09039	5.90875	9.99943	0.454519	14.5446							943.198	1.35626	1.80835	21.7002	4.06879	10.8501	18.0835						942.476	-5.80794	-4.46765	-2.23382	6.70147	10.7224	-6.70147	4.91441
944.642	22.2725	7.72719	-3.18179	5.45449	18.1816							944.642	8.18173	7.27265	1.36362	9.9999	-4.09087							943.92	-2.2726	-9.5449	11.363	0.454519	4.54519	9.09039						943.198	17.6314	8.58966	6.78131	0.904175	8.58966	-5.87714	7.2334
945.363	17.7293	8.18276	8.63736	20.9115	3.18218							945.363	-0.909195	-0.909195	8.63736	-2.27299	5.00058							944.642	-8.63627	4.99995	4.54541	2.2727	11.8181	3.18179						943.92	6.36327	23.635	-3.63615	2.2726	4.99971	0	6.81779
946.085	13.1258	6.33659	12.2206	19.915	4.07352							946.085	2.26307	-3.16829	6.33659	15.3889	7.69443							945.363	-5.90977	7.72816	-1.81839	18.6385	9.54655	-3.18218						944.642	-12.2726	6.81811	21.818	0.909081	9.54536	-2.2727	1.36362
946.806	9.39996	3.13332	4.02855	36.7046	5.37141							946.806	-2.6857	16.1142	4.47617	6.71426	13.4285							946.085	-9.95749	13.1258	-9.95749	6.33659	-3.62091	18.5571						945.363	16.3655	6.81897	10.4557	26.3667	-14.0925	26.3667	12.2741
947.528	3.51164	13.6076	5.70641	11.4128	-4.38955							947.528	-4.38955	15.3634	7.90118	21.0698	17.1192							946.806	0.895234	7.16188	14.3238	6.71426	18.7999	10.7428						946.085	10.4101	1.81045	17.6519	1.35784	1.81045	13.1258	9.50488
948.249	11.1838	6.88236	9.03309	6.02206	17.636							948.249	6.02206	-11.614	9.89339	12.4743	14.625							947.528	2.19477	19.753	9.657	-17.5582	26.3373	12.7297						946.806	7.16188	-5.37141	6.71426	-1.34285	-8.50473	10.2952	4.02855
948.971	14.3064	-6.31165	4.20777	2.10389	3.36622							948.971	5.89088	-2.52466	14.3064	-1.26233	6.73243							948.249	-15.0552	18.9265	0	2.15074	16.7757	15.9155						947.528	-9.21805	3.51164	8.34014	11.8518	0	14.9245	9.21804
949.692	21.0832	8.68132	4.96075	15.2957	13.2287							949.692	6.61434	6.20094	-3.30717	13.2287	-1.24019							948.971	6.73243	6.73243	6.73243	-4.20777	1.68311	14.3064						948.249	0.430147	2.15074	8.1728	19.3566	-4.30147	4.73162	3.44118
950.413	2.03758	5.29772	8.96537	14.2631	3.26013							950.413	24.451	9.37289	10.1879	12.633	8.55785							949.692	9.09471	15.2957	13.2287	5.78754	-1.24019	9.50811						948.971	6.31165	7.57399	3.36622	13.4649	-9.67787	10.0986	13.4649
951.134	5.22033	12.85	-2.00782	10.8422	-0.401564							951.134	5.22033	12.85	15.661	8.03128	-2.40938							950.413	8.15034	0.815034	4.48269	3.26013	14.6706	17.1157						949.692	16.9492	4.13396	16.5358	16.9492	18.1894	12.8153	10.7483
951.855	0.787551	9.84439	3.15021	-5.11908	-2.75643							951.855	-3.54398	11.8133	-16.1448	12.6008	9.05684							951.134	10.8422	-6.82659	10.8422	6.82659	16.0626	10.0391						950.413	4.48269	5.70524	4.48269	11.818	12.2255	11.818	8.15034
952.576	17.379	-12.3584	18.1514	15.0618	6.17922							952.576	16.9928	6.95162	6.17922	18.9238	17.7652							951.855	6.30041	3.54398	7.87551	8.26929	16.1448	7.48174						951.134	12.0469	8.03128	8.43284	13.6532	-4.81877	14.8579	3.61408
953.297	16.1598	9.77103	18.0388	0.751618	9.39523							953.297	1.50324	3.00647	2.63066	18.4146	5.26133							952.576	2.70341	3.08961	10.0412	-5.02061	15.8342	2.70341						951.855	-3.15021	21.6577	10.2382	24.0203	14.1759	13.3884	-2.36265
954.018	7.01144	4.05926	-0.738047	15.499	16.237							954.018	4.42828	9.5946	15.13	0.369023	0.738047							953.297	3.00647	13.9049	10.8985	0	7.51618	3.00647						952.576	2.70341	5.02061	3.08961	10.0412	16.9928	5.79301	3.86201
954.739	-0.729074	7.29074	2.9163	4.37445	16.7687							954.739	2.18722	8.74889	-4.00991	1.09361	9.11343							954.018	2.95219	7.01144	15.499	3.32121	7.38047	18.0821						953.297	6.76456	4.1339	8.2678	10.1468	4.88552	13.1533	24.4276
955.46	5.77999	2.1675	-3.6125	16.6175	2.1675							955.46	13.3662	13.005	2.89	7.22499	3.6125							954.739	10.207	4.00991	14.2169	7.29074	19.685	7.29074						954.018	-4.42828	0	3.69023	12.5468	12.5468	5.90437	11.4397
956.181	9.29314	5.71885	6.43371	20.7309	21.4457							956.181	8.22085	-2.85943	6.43371	6.43371	8.22085							955.46	5.05749	-1.08375	11.56	10.8375	17.34	0.36125						954.739	0	4.73898	8.74889	7.65528	0.364537	-7.65528	0.364537
956.902	9.15714	6.69176	4.22637	1.76099	5.28297							956.902	12.3269	-1.05659	4.57857	19.0187	0.704396							956.181	8.93571	12.51	9.65057	5.004	-1.42971	7.14857						955.46	9.03124	16.9787	5.41874	0.722499	6.14124	0.722499	19.1462
																								956.902	-8.10055	6.69176	5.63517	10.9181	2.46538	6.69176						956.181	9.65057	7.506	5.36143	11.0803	10.7229	-5.71885	16.7991
																																				956.902	8.45275	1.05659	7.39616	5.28297	0	-3.87418	-1.40879

## Sheet: PLQY_day 1_PQDs
QUA												QUA
4												4
27	1024	1	1	0	1	257	285	501	1023			14	1024	1	1	0	1	255	283	500	979
390.60nm	411.73nm	573.78nm	956.90nm									389.09nm	410.22nm	573.03nm	925.14nm
FAPbI3												FAPbSrI3 = 4, 7, 12, 6%
N o.	Cursor1-2: 390.60 - 411.73(nm)	Cursor3-4: 573.78 - 956.90(nm)	QuantumYield	Abs	Peak Wavelength	Peak Count	Peak FWHM	Peak Wavelength	Peak Count	Peak FWHM		N o.	Cursor1-2: 389.09 - 410.22(nm)	Cursor3-4: 573.03 - 925.14(nm)	QuantumYield	Abs	Peak Wavelength	Peak Count	Peak FWHM	Peak Wavelength	Peak Count	Peak FWHM
1	154960659	---	---	---	401.17	54534.9	6.77	882.38	25.18	4.16		1	102718223	---	---	---	399.66	36637	6.65	770.66	67.5	48.59
2	100287382	35368679	0.647	0.353	401.17	35351.1	6.76	776.53	708.19	58.68		2	31957948	44622033	0.631	0.689	399.66	11446.3	6.62	752.29	985.12	59.6
3	72216388	59805972	0.723	0.534	401.17	25440.5	6.77	778.73	1196.84	58.67		3	23114367	72660151	0.913	0.775	399.66	8283.79	6.63	754.5	1608.63	58.81
4	65932815	66089216	0.742	0.575	401.17	23260.4	6.75	778.73	1319.32	58.38		4	16141155	82805130	0.956	0.843	399.66	5799.91	6.62	755.97	1833.68	57.93
5	55955487	79338496	0.801	0.639	401.17	19737.4	6.76	780.93	1591.03	58.23		5	12668979	87406999	0.971	0.877	399.66	4551.29	6.63	755.23	1954.8	57.44
												6	10980674	90057186	0.982	0.893	399.66	3957.73	6.59	755.23	1998.17	57.72
												7	39565290	20692219	0.328	0.615	399.66	14125.4	6.65	745.67	482.44	56.74
Wavelength	1	2(QY=0.646910)	3(QY=0.722781)	4(QY=0.742343)	5(QY=0.801357)			FAPbI3				8	22912759	64761050	0.811	0.777	399.66	8200.76	6.63	753.03	1468.02	56.92
195.445	414.325	-239.034	318.712	478.068	-127.485							9	15125830	75666710	0.864	0.853	399.66	5423.89	6.64	751.56	1718.77	56.3
196.208	71.724	143.448	114.758	301.241	-200.827							10	15822174	40411246	0.465	0.846	399.66	5671.97	6.62	731.69	962.58	52.48
196.972	-52.2542	169.826	-26.1271	156.763	169.826							11	12246166	44488918	0.492	0.881	399.66	4409.3	6.61	732.42	1066.02	52.33
197.735	132.187	60.0851	372.528	168.238	240.341							12	19305485	74718585	0.896	0.812	399.66	6926.55	6.63	766.99	1601.86	59.22
198.498	88.8004	355.202	244.201	244.201	-122.101							13	13025654	81568385	0.909	0.873	399.66	4664.87	6.63	766.25	1759.77	58.58
199.261	30.526	223.857	142.455	-152.63	295.084
200.024	112.167	392.584	18.6945	102.82	46.7362
200.787	403.878	85.9316	189.049	214.829	85.9316							Wavelength	1	2(QY=0.630609)	3(QY=0.912772)	4(QY=0.956433)	5(QY=0.970658)	6Sr(QY=0.981683)	7(QY=0.327653)	8(QY=0.811486)	9(QY=0.863850)	10(QY=0.465053)	11(QY=0.491742)	12(QY=0.895769)	13Sr(QY=0.909422)
201.55	157.738	228.72	-118.303	-181.398	70.982							195.445	270.905	398.39	-95.6136	223.098	207.163	462.132	-79.678	159.356	-79.678	63.7424	-589.617	525.875	-175.292
202.313	79.5456	303.719	50.6199	-455.579	231.405							196.208	114.758	-272.551	-157.793	258.206	143.448	243.862	344.275	-28.6896	-272.551	114.758	301.241	286.896	-86.0688
203.076	92.9139	159.281	66.3671	199.101	99.5506							196.972	52.2542	169.826	300.462	26.1271	-274.335	-104.508	143.699	313.525	300.462	378.843	300.462	-65.3178	-39.1907
203.839	316.745	146.19	36.5475	36.5475	146.19							197.735	276.392	372.528	444.63	120.17	-48.0681	-276.392	12.017	156.221	336.477	72.1022	240.341	-24.0341	-156.221
204.602	39.1932	167.971	123.179	229.56	-11.1981							198.498	11.1001	-233.101	122.101	22.2001	155.401	455.102	310.801	99.9005	344.102	-22.2001	0	366.302	22.2001
205.364	-46.4303	61.907	51.5892	-87.7016	-87.7016							199.261	81.4026	-213.682	-376.487	376.487	396.838	396.838	244.208	284.909	213.682	305.26	172.981	264.558	-30.526
206.127	104.873	95.3391	66.7374	157.31	0							200.024	-18.6945	112.167	252.376	-186.945	56.0835	-93.4725	224.334	84.1252	327.154	168.25	140.209	168.25	28.0417
206.89	22.058	74.9971	101.467	-26.4696	57.3507							200.787	-120.304	17.1863	-180.456	68.7453	-111.711	51.5589	214.829	317.947	292.167	-60.1521	60.1521	266.388	60.1521
207.653	40.9766	176.199	73.7578	102.441	12.293							201.55	-165.625	149.851	-15.7738	-55.2082	102.53	126.19	118.303	-141.964	165.625	70.982	0	47.3213	-23.6607
208.415	-22.8895	26.7044	49.5939	-3.81491	45.779							202.313	-245.868	-137.397	7.23142	173.554	-65.0827	108.471	-130.165	108.471	0	-50.6199	202.48	0	57.8513
209.178	64.174	57.0436	17.8261	-46.3479	-39.2175							203.076	185.828	112.824	-59.7304	66.3671	59.7304	46.4569	59.7304	-59.7304	53.0936	199.101	146.008	159.281	19.9101
209.941	86.9008	120.324	-43.4504	50.1351	-33.4234							203.839	-6.09125	54.8212	79.1862	-24.365	79.1862	24.365	60.9125	-18.2737	6.09125	97.46	36.5475	-12.1825	-6.09125
210.704	-100.675	47.1916	-69.2143	53.4838	28.3149							204.602	-33.5942	145.575	55.9903	11.1981	173.57	-27.9952	195.966	240.758	111.981	5.59903	145.575	50.3913	95.1835
211.466	-35.6317	59.3862	95.018	95.018	106.895							205.364	51.5892	-36.1124	-51.5892	-25.7946	-67.0659	30.9535	10.3178	211.516	30.9535	-98.0194	103.178	-128.973	25.7946
212.229	-11.2486	50.6188	-53.431	134.984	36.5581							206.127	123.941	14.3009	-152.543	-9.53391	47.6696	9.53391	47.6696	71.5043	23.8348	95.3391	28.6017	-85.8052	95.3391
212.991	80.0762	120.114	40.0381	133.46	16.0152							206.89	163.229	4.41159	-4.41159	-8.82319	-4.41159	57.3507	-79.4087	185.287	39.7043	-123.525	61.7623	26.4696	66.1739
213.754	73.6446	-10.1579	-60.9472	58.4078	40.6315							207.653	49.1719	8.19531	20.4883	53.2695	-131.125	258.152	16.3906	0	73.7578	0	77.8555	73.7578	77.8555
214.516	91.8986	55.6228	-26.6022	7.25515	-41.1125							208.415	110.632	-72.4833	22.8895	-3.81491	-7.62983	72.4833	-26.7044	129.707	-7.62983	-30.5193	57.2237	15.2597	15.2597
215.279	83.0282	34.5951	46.1268	-41.5141	34.5951							209.178	39.2175	46.3479	67.7393	-7.13045	17.8261	-10.6957	49.9131	57.0436	85.5654	24.9566	49.9131	-14.2609	67.7393
216.041	70.4772	96.9061	46.2507	-4.40482	-15.4169							209.941	-63.5044	-46.7927	-80.2161	43.4504	-76.8738	6.68468	147.063	-30.081	133.694	116.982	-83.5585	6.68468	-16.7117
216.804	42.1041	0	-2.10521	37.8937	-12.6312							210.704	3.1461	-18.8766	-81.7987	100.675	-6.29221	-12.5844	-50.3377	34.6072	-15.7305	28.3149	-56.6299	9.43832	0
217.566	46.3077	42.2809	32.214	-38.2542	22.1472							211.466	23.7545	62.3555	32.6624	38.6011	-8.90794	8.90793	-11.8772	-5.93862	68.2942	29.6931	44.5397	47.509	35.6317
218.328	73.2611	42.4143	52.0539	44.3422	21.2072							212.229	22.4973	39.3702	-5.62432	11.2486	-47.8067	16.8729	28.1216	0	-11.2486	81.5526	61.8675	33.7459	-28.1216
219.091	27.7166	-1.84777	49.8898	-40.651	92.3885							212.991	48.0457	-37.3689	21.3537	-26.6921	56.0533	82.7454	-58.7225	53.3841	-2.66921	29.3613	42.7073	34.6997	-2.66921
219.853	21.254	1.77117	61.9908	-5.3135	-1.77117							213.754	-20.3157	-68.5656	17.7763	68.5656	-60.9472	55.8683	35.5526	-53.3288	27.9342	38.092	-68.5656	50.7894	35.5526
220.615	8.48805	-5.09283	-11.8833	37.3474	57.7187							214.516	14.5103	87.0618	48.3677	24.1838	2.41838	48.3677	-2.41838	31.439	53.2044	41.1125	38.6941	2.41838	-14.5103
221.378	17.9004	16.2731	55.3284	34.1734	14.6458							215.279	57.6585	18.4507	32.2887	43.8204	-78.4155	94.5599	50.7394	25.3697	18.4507	29.9824	11.5317	25.3697	4.61268
222.14	-3.11783	24.9426	-9.35349	18.707	23.3837							216.041	129.942	28.6314	4.40482	17.6193	-30.8338	-4.40482	44.0482	-6.60724	11.0121	-63.8699	0	28.6314	-4.40482
222.902	1.49211	43.2712	28.3501	14.9211	23.8737							216.804	35.7885	-14.7364	37.8937	16.8417	-23.1573	44.2094	10.526	14.7364	6.31562	44.2094	0	10.526	-2.10521
223.664	39.9344	22.8197	-47.0656	12.8361	14.2623							217.566	72.4816	10.0669	-32.214	-60.4013	12.0803	36.2408	50.3344	38.2542	44.2943	-36.2408	-14.0936	4.02676	44.2943
224.426	21.7714	0	-4.08215	-1.36071	-12.2464							218.328	25.063	-25.063	113.747	65.5494	52.0539	26.9909	40.4864	15.4234	25.063	42.4143	79.0448	-11.5675	73.2611
225.189	-29.7817	9.06401	-18.128	23.3075	16.8332							219.091	-9.23885	-18.4777	33.2599	7.39108	-29.5643	-36.9554	-18.4777	44.3465	29.5643	-16.6299	-22.1732	7.39108	38.8032
225.951	23.3533	29.4989	-23.3533	23.3533	3.68736							219.853	1.77117	31.881	1.77117	35.4233	-67.3043	28.3387	-17.7117	46.0503	5.3135	-15.9405	-38.9657	46.0503	-3.54233
226.713	-12.8005	11.6368	30.2558	4.65473	18.6189							220.615	16.9761	11.8833	15.2785	-3.39522	-1.69761	10.1857	35.6498	-27.1618	-27.1618	5.09283	18.6737	49.2307	32.2546
227.475	31.8865	12.0949	3.2986	-13.1944	3.2986							221.378	8.13653	58.583	-16.2731	-4.88192	-16.2731	89.5018	13.0184	27.6642	6.50922	48.8192	29.2915	-9.76384	22.7823
228.237	28.0301	51.9076	-3.11446	10.3815	-6.22892							222.14	53.0031	-15.5892	29.6194	-3.11783	53.0031	29.6194	45.2085	-51.4442	56.121	18.707	20.2659	7.79458	62.3566
228.999	25.4817	12.7409	27.4419	23.5216	-2.9402							222.902	17.9053	29.8422	-28.3501	10.4448	2.98422	32.8264	-41.779	25.3658	-20.8895	2.98422	11.9369	50.7317	-11.9369
229.761	6.48224	16.6686	37.0414	-12.0385	16.6686							223.664	21.3935	-22.8197	2.85246	2.85246	29.9508	5.70492	9.98361	-14.2623	28.5246	34.2295	-12.8361	1.42623	2.85246
230.522	4.3814	12.2679	13.1442	10.5154	14.0205							224.426	-13.6072	1.36071	24.4929	-8.16429	-38.1	44.9036	6.80358	6.80358	35.3786	-34.0179	24.4929	28.575	12.2464
231.284	19.9426	11.6332	14.9569	18.2807	9.97129							225.189	12.9486	41.4355	24.6023	23.3075	-53.0892	38.8458	10.3589	54.3841	5.17943	-14.2434	-15.5383	14.2434	-16.8332
232.046	1.57929	28.4271	22.11	-12.6343	45.0096							225.951	-2.45824	22.1241	56.5395	55.3104	11.0621	7.37472	-15.9785	-20.895	31.9571	17.2077	29.4989	45.4774	56.5395
232.808	22.5687	21.0641	9.02746	14.2935	8.27517							226.713	31.4194	2.32737	22.11	-30.2558	-32.5831	8.14578	37.2378	22.11	-1.16368	37.2378	3.49105	5.81841	5.81841
233.57	17.2353	18.6716	-10.0539	19.3897	19.3897							227.475	27.4884	-13.1944	27.4884	16.493	15.3935	16.493	7.69674	-12.0949	29.6874	12.0949	-8.79628	18.6921	-1.09953
234.332	3.4349	20.6094	15.1135	10.3047	-7.55677							228.237	6.22892	9.34338	18.6868	8.30522	-9.34338	3.11446	0	20.7631	-22.8394	-53.984	9.34338	-6.22892	3.11446
235.093	11.8512	-2.6336	4.6088	17.7768	14.4848							228.999	-7.84053	44.103	6.86047	32.3422	6.86047	6.86047	10.7807	28.4219	-10.7807	-27.4419	13.7209	-7.84053	-10.7807
235.855	3.79233	8.21672	4.42439	6.95261	16.4334							229.761	7.40828	-12.9645	0.926035	22.2248	21.2988	-0.926035	37.0414	8.33432	18.5207	-15.7426	-12.9645	32.4112	2.77811
236.617	-3.03839	10.9382	4.25374	-1.21535	1.21535							230.522	4.3814	0	6.13397	4.3814	13.1442	15.7731	24.5359	-3.50512	11.3917	-4.3814	4.3814	28.041	27.1647
237.378	5.26915	12.8802	-2.34185	1.17092	16.3929							231.284	27.4211	4.98565	-4.98565	7.47847	12.4641	19.1116	11.6332	19.9426	0	6.64753	9.97129	-5.81659	17.4498
238.14	11.8695	11.8695	9.60866	16.9565	-18.0869							232.046	-1.57929	10.2654	-3.94821	28.4271	12.6343	3.15857	-1.57929	-6.31714	22.11	-0.789642	-12.6343	3.15857	-5.5275
238.902	8.74556	12.5717	-2.18639	12.0251	6.01257							232.808	12.0366	24.8255	8.27517	8.27517	5.26602	6.7706	-15.0458	16.5503	12.7889	11.2843	1.50458	11.2843	27.0824
239.663	7.94437	8.474	5.82587	-9.00362	7.94437							233.57	35.9069	-12.9265	-0.718139	32.3162	-24.4167	-3.59069	26.5711	0	7.89952	-10.0539	-9.3358	-7.18139	-10.0539
240.425	13.8815	8.2261	6.68371	-2.57066	-1.02826							234.332	-3.4349	-16.4875	0.686979	25.4182	5.49583	7.55677	13.0526	11.6786	22.6703	-8.93073	6.86979	-2.74792	3.4349
241.186	-9.99461	0	3.99784	9.49488	11.9935							235.093	-1.3168	1.9752	18.4352	18.4352	-5.2672	5.2672	19.0936	-8.55921	-2.6336	32.2616	17.7768	11.1928	21.7272
241.948	5.83644	18.9684	25.2912	17.5093	0.97274							235.855	14.5373	11.377	13.9052	6.95261	13.2732	-13.2732	-9.48083	2.52822	3.16028	-6.32055	2.52822	20.8578	6.95261
242.709	26.0741	4.26668	16.1186	8.53336	5.68891							236.617	26.1301	9.72284	-12.1535	-6.68445	-8.50748	4.86142	4.86142	13.9766	-1.82303	-1.82303	12.1535	6.68445	5.4691
243.471	4.62488	-0.462488	9.24975	10.6372	6.93731							237.378	7.611	17.5638	9.95284	0	7.02554	10.5383	-1.17092	17.5638	-8.19646	12.2947	14.6365	-3.51277	-1.17092
244.232	4.51702	11.2925	-4.06532	-2.25851	-8.58233							238.14	7.3478	14.1304	-12.4347	7.3478	3.39129	-3.39129	-6.21737	9.60866	1.13043	3.39129	20.3478	1.13043	11.3043
244.993	15.899	3.09147	6.18295	8.39114	11.9243							238.902	16.9445	-1.09319	0	14.2115	-5.46597	-4.37278	-12.5717	7.10576	-4.37278	8.74556	6.01257	4.37278	10.3853
245.755	1.29645	-0.432149	6.05008	1.29645	4.32149							239.663	13.2406	3.17775	5.29625	-11.1221	2.1185	-19.5961	-3.17775	-5.82587	-3.17775	10.5925	3.17775	17.4776	-3.70737
246.516	12.693	11.4237	-4.65411	3.8079	6.34651							240.425	13.3674	5.14131	-5.65544	13.3674	-9.25436	19.537	6.68371	1.54239	19.537	4.11305	-6.16957	6.16957	3.59892
247.277	12.4373	4.14577	0	-8.70611	-3.73119							241.186	-2.49865	12.4933	-4.9973	-14.4922	4.9973	7.49596	8.99515	8.49542	2.99838	1.99892	0.49973	4.9973	1.49919
248.038	13.8149	-2.84425	14.2213	18.6908	3.65689							241.948	1.94548	4.37733	6.80918	-1.45911	10.7001	-1.45911	-15.0775	11.1865	-11.6729	13.132	5.35007	5.35007	10.7001
248.8	14.3432	7.57003	5.97634	-9.16371	0.398422							242.709	10.4297	-5.21483	-4.74076	-3.7926	-3.31853	-6.63706	7.58521	4.74075	-1.8963	-4.74075	6.16298	4.74075	0.948151
249.561	9.77155	5.86293	13.2893	0.390862	-1.17259							243.471	14.3371	10.1747	-6.47483	3.23741	-0.462487	5.08736	-17.5745	-6.47483	1.38746	2.31244	-2.77493	5.08736	-3.6999
250.322	9.59173	1.15101	1.15101	3.06935	-4.9877							244.232	14.9062	9.48574	-1.35511	-1.80681	3.61361	1.80681	14.9062	-1.80681	4.06532	-4.96872	12.6476	12.6476	-9.03403
251.083	1.13035	14.3177	2.26069	-3.76782	12.4338							244.993	0	-8.39114	-2.64983	2.20819	-2.20819	-4.41639	19.8738	11.041	2.20819	0.441639	-7.50786	2.20819	-0.441639
251.844	15.9272	-1.4816	-1.1112	0	1.1112							245.755	5.18578	0.864297	0.864297	9.07512	-8.21082	-4.32149	7.34652	16.4216	-1.29645	-6.91438	-3.88934	9.07512	11.2359
252.605	9.84128	3.64492	18.5891	0.364492	2.91594							246.516	0.4231	11.8468	2.9617	9.30821	-0.846201	-1.6924	-8.03891	-1.6924	16.5009	9.73131	-0.4231	13.5392	19.0395
253.366	9.69287	2.15397	2.15397	-4.66694	10.0519							247.277	5.3895	8.29153	-7.0478	9.94984	-6.63323	-5.3895	7.0478	2.90204	-1.24373	4.97492	0	6.21865	0.829153
254.127	2.12394	8.14178	4.95586	-2.47793	8.84976							248.038	9.34539	-13.0023	-3.25057	5.6885	-1.21896	-4.06321	3.25057	-4.46954	7.31379	-16.2529	9.75172	-0.812643	7.31379
254.888	11.5333	6.98988	5.5919	2.09696	-8.03836							248.8	3.5858	8.76529	16.7337	-5.57791	0.398422	10.7574	17.5306	3.18738	1.99211	6.77318	-7.57003	13.9448	-11.1558
255.649	2.07293	7.25526	-8.63721	3.80037	4.49135							249.561	12.5076	-6.25379	2.73604	7.81724	2.34517	5.08121	-0.390862	1.95431	0	7.81724	9.77155	5.08121	1.17259
256.41	4.10219	7.86253	5.81144	6.83698	-4.78589							250.322	12.6611	1.15101	12.6611	3.45302	-5.37137	5.75504	-6.90605	14.1958	-8.82439	9.9754	7.28972	10.3591	-3.45302
257.171	4.7414	11.1762	6.09609	13.2082	3.38672							251.083	10.5499	4.89817	6.4053	3.39104	-3.01426	11.3035	3.76782	7.91242	2.26069	16.9552	3.01426	9.41955	-2.63747
[truncated: 950 more rows]

## Sheet: PLQY_day 4_PQDs
QUA												QUA
[truncated: 1,046 more rows]

[truncated: 5 more sheets: PLQY_day 7_PQDs, PLQY_day 11_PQDs, PLQY_day 15_PQDs, PLQY_day 30_PQDs, Stability_PQDs]
